# Supplementary material for: Pd(ii)-catalyzed remote regiodivergent ortho- and meta-C–H functionalizations of phenylethylamines
Source: PubMed Central journal article supplement (PMC5949857; doi:10.1039/c5sc01737h), 2015-06-25
Supplement: SC-006-C5SC01737H-s001.pdf [file SC-006-C5SC01737H-s001.pdf]

## Electronic Supplementary Information

### Pd(II)-Catalyzed Remote Regiodivergent *ortho*- and *meta*-C–H Functionalizations of Phenylethylamines†

Shangda Li,<sup>‡a</sup> Huafang Ji,<sup>‡a</sup> Lei Cai<sup>a</sup> and Gang Li<sup>\*ab</sup>

<sup>a</sup> Key Laboratory of Coal to Ethylene Glycol and Its Related Technology, Fujian Institute of Research on the Structure of Matter, Chinese Academy of Sciences, 155 West Yang-Qiao Road, Fuzhou, Fujian, 350002, P. R. China

<sup>b</sup> State Key Laboratory of Structural Chemistry, Chinese Academy of Sciences, Fuzhou, Fujian, 350002, P. R. China

gangli@fjirsm.ac.cn

### Table of Contents

|                                                                                                                                |      |
|--------------------------------------------------------------------------------------------------------------------------------|------|
| 1. General Information.....                                                                                                    | S2   |
| 2. Experimental Section.....                                                                                                   | S2   |
| 2.1 Preparation and characterization of substrates.....                                                                        | S2   |
| 2.2 Optimization of olefination reaction conditions.....                                                                       | S11  |
| 2.3 General remote-selective <i>ortho</i> -C–H bond olefination procedure and characterization of olefinated compounds.....    | S14  |
| 2.4 General remote-selective <i>meta</i> -C–H bond olefination procedure and characterization of olefinated compounds.....     | S18  |
| 2.5 Sequential remote-selective <i>ortho</i> - and <i>meta</i> -C–H bond olefination and characterization of the products..... | S32  |
| 2.6 Removal of the directing group and characterization of selected hydrolyzed products.....                                   | S34  |
| 2.7 Hydrolysis of compound <b>4a<sub>mono</sub></b> to <b>S17</b> .....                                                        | S36  |
| 2.8 Reference.....                                                                                                             | S37  |
| 3. NMR Spectra of New Compounds.....                                                                                           | S38  |
| 4. X-Ray Crystallography data for <b>1a'</b> (CCDC 1056709) and <b>S17</b> (CCDC 1406595).....                                 | S117 |

## 1. General Information

Unless otherwise noted, commercial available reagents were purchased from commercial suppliers (such as Strem, J&K Chemical Co., Energy Chemical and Sinopharm,), and used as received. Solvents were generally distilled over CaH<sub>2</sub> or dried over 3 Å molecular sieves. THF was distilled over sodium under nitrogen. Hexafluoroisopropanol (HFIP) was distilled before use. Unless otherwise noted, all reactions were run under air and the indicated reaction temperature was that of the oil bath. The reaction vessels used for C–H functionalization were 38 mL sealed tube or 50 mL Schlenk tube (Synthware). Purification of products was performed by flash chromatography (FC) using silica gel or preparative thin layer chromatography. <sup>1</sup>H and <sup>13</sup>C NMR spectra were recorded on a Bruker AVANCE III spectrometer (400 MHz and 101 MHz, respectively). Chemical shifts are reported parts per million (ppm) referenced to CDCl<sub>3</sub> (δ 7.26 ppm) for <sup>1</sup>H NMR, CDCl<sub>3</sub> (δ 77.16 ppm) for <sup>13</sup>C NMR or tetramethylsilane (TMS, δ 0.00 ppm for <sup>1</sup>H NMR). The following abbreviations (or combinations thereof) were used to explain multiplicities: s = singlet, d = doublet, t = triplet, q = quartet, hept = heptaplet, m = multiplet, and br = broad. High-resolution mass spectra (HRMS) were obtained on an AB Sciex TripleTOF 5600 LC/MS equipped with an ESI source at the Shanghai Institute of Organic Chemistry (CAS). X-Ray Crystallography data was obtained at Fujian Institute of Research on the Structure of Matter.

## 2. Experimental Section

### 2.1 Preparation and characterization of substrates.

*General procedure for preparing substrates of remote-selective ortho-C–H bond olefination:*

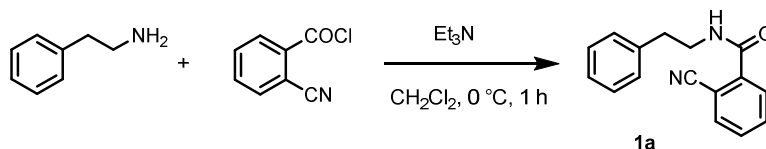

To a solution of 2-cyanobenzoic acid<sup>SI</sup> (441 mg, 3.0 mmol) and DMF (10 μL) in CH<sub>2</sub>Cl<sub>2</sub> (20 mL) under N<sub>2</sub> atmosphere was added oxalyl chloride (570 mg, 4.5 mmol) dropwise. The reaction was stirred until the solid suspension disappeared. Then the solvent was removed under reduced pressure. The residue was dissolved in CH<sub>2</sub>Cl<sub>2</sub> (10 mL). Then the above solution was added dropwise to a solution of 2-phenylethan-1-amine (363 mg, 3.0 mmol) and Et<sub>3</sub>N (0.5 mL, 3.6 mmol) in CH<sub>2</sub>Cl<sub>2</sub> (20 mL) at 0 °C. After stirring for 1 h at 0 °C, the reaction mixture was diluted with CH<sub>2</sub>Cl<sub>2</sub> (20 mL) and washed with H<sub>2</sub>O (20 mL). The organic phase was dried over anhydrous Na<sub>2</sub>SO<sub>4</sub> and concentrated under reduced pressure. The residue was purified by flash silica gel chromatography with petroleum ether/EtOAc (2:1) to afford compound 2-cyano-*N*-phenethylbenzamide **1a** (607 mg, 81%).

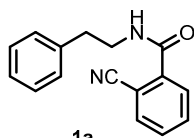

1a

**2-Cyano-*N*-phenethylbenzamide:**  $^1\text{H}$  NMR (400 MHz,  $\text{CDCl}_3$ )  $\delta$  7.81-7.67 (m, 2H), 7.63 (t,  $J = 7.6$  Hz, 1H), 7.55 (t,  $J = 7.5$  Hz, 1H), 7.38-7.30 (m, 2H), 7.30-7.21 (m, 3H), 6.24 (brs, 1H), 3.77 (dd,  $J = 13.1, 6.7$  Hz, 2H), 2.99 (t,  $J = 7.0$  Hz, 2H);  $^{13}\text{C}$  NMR (101 MHz,  $\text{CDCl}_3$ )  $\delta$  165.4, 138.8, 138.6, 134.1, 132.9, 131.0, 128.9, 128.8, 128.5, 126.7, 117.6, 110.6, 41.6, 35.4; HRMS ( $m/z$ , ESI-TOF): Calcd for  $\text{C}_{16}\text{H}_{15}\text{N}_2\text{O}^+$   $[\text{M}+\text{H}^+]$  251.1179, found 251.1180.

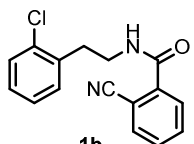

1b

***N*-(2-chlorophenethyl)-2-cyanobenzamide:**  $^1\text{H}$  NMR (400 MHz,  $\text{CDCl}_3$ )  $\delta$  7.74 (t,  $J = 8.2$  Hz, 2H), 7.65 (td,  $J = 7.7, 1.1$  Hz, 1H), 7.56 (td,  $J = 7.5, 1.2$  Hz, 1H), 7.38 (dd,  $J = 7.5, 1.6$  Hz, 1H), 7.33 (dd,  $J = 7.2, 1.8$  Hz, 1H), 7.25-7.16 (m, 2H), 6.27 (brs, 1H), 3.80 (dd,  $J = 13.0, 6.9$  Hz, 2H), 3.14 (t,  $J = 7.0$  Hz, 2H);  $^{13}\text{C}$  NMR (101 MHz,  $\text{CDCl}_3$ )  $\delta$  165.4, 138.7, 136.4, 134.3, 134.2, 133.0, 131.3, 131.1, 129.8, 128.6, 128.4, 127.3, 117.6, 110.7, 40.3, 33.2; HRMS ( $m/z$ , ESI-TOF): Calcd for  $\text{C}_{16}\text{H}_{14}\text{ClN}_2\text{O}^+$   $[\text{M}+\text{H}^+]$  285.0789, found 285.0790.

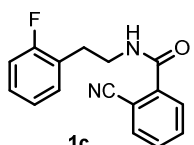

1c

**2-Cyano-*N*-(2-fluorophenethyl)benzamide:**  $^1\text{H}$  NMR (400 MHz,  $\text{CDCl}_3$ )  $\delta$  7.75-7.67 (m, 2H), 7.62 (t,  $J = 7.6$  Hz, 1H), 7.55 (t,  $J = 7.6$  Hz, 1H), 7.30-7.18 (m, 2H), 7.13-6.99 (m, 2H), 6.46 (brs, 1H), 3.74 (q,  $J = 6.6$  Hz, 2H), 3.02 (t,  $J = 7.0$  Hz, 2H);  $^{13}\text{C}$  NMR (101 MHz,  $\text{CDCl}_3$ )  $\delta$  165.4, 161.4 (d,  $J_{\text{C-F}} = 245.4$  Hz), 138.7, 134.2, 132.9, 131.3 (d,  $J_{\text{C-F}} = 5.1$  Hz), 131.0, 128.6 (d,  $J_{\text{C-F}} = 8.1$  Hz), 128.5, 125.6 (d,  $J_{\text{C-F}} = 16.2$  Hz), 124.4 (d,  $J_{\text{C-F}} = 4.0$  Hz), 117.6, 115.5 (d,  $J_{\text{C-F}} = 22.2$  Hz), 110.7, 40.6, 29.1; HRMS ( $m/z$ , ESI-TOF): Calcd for  $\text{C}_{16}\text{H}_{14}\text{FN}_2\text{O}^+$   $[\text{M}+\text{H}^+]$  269.1085, found 269.1085.

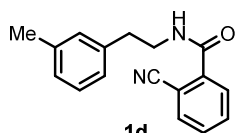

1d

**2-Cyano-*N*-(3-methylphenethyl)benzamide:**  $^1\text{H}$  NMR (400 MHz,  $\text{CDCl}_3$ )  $\delta$  7.79-7.66 (m, 2H), 7.62 (t,  $J = 7.5$  Hz, 1H), 7.54 (t,  $J = 7.6$  Hz, 1H), 7.21 (t,  $J = 7.5$  Hz, 1H), 7.15-7.00 (m, 3H), 6.35 (brs, 1H), 3.73 (q,  $J = 6.9$  Hz, 2H), 2.93 (t,  $J = 7.1$  Hz, 2H), 2.33 (s, 3H);  $^{13}\text{C}$  NMR (101 MHz,  $\text{CDCl}_3$ )  $\delta$  165.3, 138.8, 138.5, 134.1, 132.9, 131.0, 129.7, 128.7, 128.6, 127.5, 125.9, 117.6, 110.6, 41.7, 35.3, 21.5; HRMS ( $m/z$ , ESI-TOF): Calcd for  $\text{C}_{17}\text{H}_{17}\text{N}_2\text{O}^+$   $[\text{M}+\text{H}^+]$  265.1335, found 265.1336.

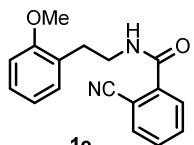

1e

**2-Cyano-*N*-(2-methoxyphenethyl)benzamide:**  $^1\text{H}$  NMR (400 MHz,  $\text{CDCl}_3$ )  $\delta$  7.73 (d,  $J = 7.7$  Hz, 1H), 7.66 (dd,  $J = 7.7, 1.2$  Hz, 1H), 7.61 (td,  $J = 7.6, 1.4$  Hz, 1H), 7.54 (td,  $J = 7.5, 1.3$  Hz, 1H), 7.26-7.17 (m, 2H), 6.92 (t,  $J = 7.4$  Hz, 1H), 6.87 (d,  $J = 8.2$  Hz, 1H), 6.54 (brs, 1H), 3.83 (s, 3H), 3.73 (q,  $J = 6.4$  Hz, 2H), 2.98 (t,  $J = 6.7$  Hz, 2H);  $^{13}\text{C}$  NMR (101 MHz,  $\text{CDCl}_3$ )

$\delta$  165.3, 157.6, 139.1, 134.2, 132.8, 130.9, 130.9, 128.5, 128.2, 127.3, 121.0, 117.6, 110.7, 110.7, 55.5, 41.1, 30.1; HRMS (m/z, ESI-TOF): Calcd for  $C_{17}H_{17}N_2O_2^+$   $[M+H]^+$  281.1285, found 281.1296.

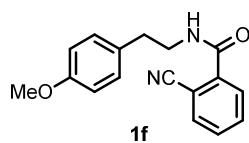

**1f** **2-Cyano-N-(4-methoxyphenethyl)benzamide:**  $^1H$  NMR (400 MHz,  $CDCl_3$ )  $\delta$  7.69 (dd,  $J = 7.6, 1.3$  Hz, 1H), 7.65 (dd,  $J = 7.8, 1.4$  Hz, 1H), 7.59 (td,  $J = 7.6, 1.4$  Hz, 1H), 7.52 (td,  $J = 7.6, 1.4$  Hz, 1H), 7.15 (d,  $J = 8.5$  Hz, 2H), 6.83 (d,  $J = 8.6$  Hz, 2H), 6.47 (brs, 1H), 3.76 (s, 3H), 3.67 (q,  $J = 6.9$  Hz, 2H), 2.88 (t,  $J = 7.1$  Hz, 2H);  $^{13}C$  NMR (101 MHz,  $CDCl_3$ )  $\delta$  165.4, 158.4, 138.8, 134.1, 132.9, 130.9, 130.6, 129.8, 128.4, 117.6, 114.2, 110.6, 55.3, 41.8, 34.5; HRMS (m/z, ESI-TOF): Calcd for  $C_{17}H_{17}N_2O_2^+$   $[M+H]^+$  281.1285, found 281.1295.

### General procedure for preparing substrates of remote meta-C–H bond olefination:

**Method A** (for substrates **3a-3n**, except **3e** and **3i**):

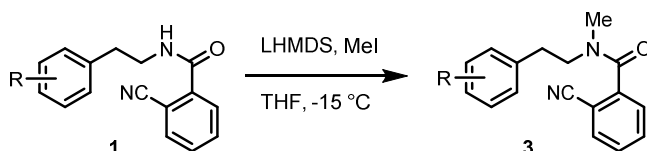

To a cooled solution of amide **1** (2.0 mmol, *directly synthesized as above without purification*) in THF (20 mL) at  $-15$  °C was added LHMDS (1.0 M in THF, 2.4 mL, 2.4 mmol, 1.2 equiv). After stirring at  $-15$  °C for 15 min, MeI (150  $\mu$ L, 2.4 mmol, 1.2 equiv) was added dropwise to the above solution. The solution was then slowly warmed to room temperature. After 1 h, the reaction was diluted with EtOAc (30 mL) and quenched with water (20 mL). After removing the organic phase, the aqueous phase was extracted again with EtOAc twice (30 mL  $\times$  2). The combined organic extract was washed with brine, dried over  $Na_2SO_4$  and concentrated *in vacuo*. The residue was purified by flash silica gel chromatography with petroleum ether/EtOAc to afford corresponding amide **3** in 70%-90% yields.

**Method B** (for substrates **3e** and **3i**):

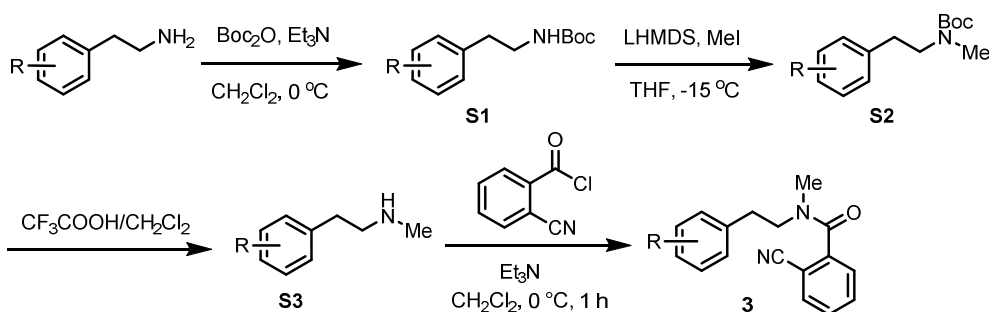

Step 1: To a solution of 2-phenylethan-1-amine (2.0 mmol) and  $Et_3N$  (404 mg, 4.0 mmol) in  $CH_2Cl_2$  (7 mL) was added  $Boc_2O$  (654 mg, 3.0 mmol, dissolved in 3 mL  $CH_2Cl_2$ ) at  $0$  °C. After stirring at  $0$  °C for 5 min,  $H_2O$  (10 mL) was added to quench the reaction. The aqueous phase was extracted with  $CH_2Cl_2$  (10 mL  $\times$  2). The combined organic phase was dried over anhydrous  $Na_2SO_4$  and concentrated under reduced pressure. The residue was purified by flash silica gel

chromatography with petroleum ether/EtOAc to afford corresponding carbamate **S1** in quantitative yields.

Step 2: similar procedure as **Method A**.

Step 3: To a solution of the crude product **S2** (without purification) from Step 2 in  $\text{CH}_2\text{Cl}_2$  (10 mL) was dropwise added  $\text{CF}_3\text{COOH}$  (10 mL) at room temperature. The reaction was then stirred for 10 minutes and the solvent was removed under reduced pressure. To the residue was added NaOH solution (1 N, 10 mL), and the aqueous phase was extracted with  $\text{CH}_2\text{Cl}_2$  (10 mL  $\times$  3). The combined organic phase was dried over anhydrous  $\text{Na}_2\text{SO}_4$  and concentrated under reduced pressure to yield **S3** in 80-90% yields.

Step 4: similar procedure as the preparation for substrate **1**.

Preparation for substrates **3o**:

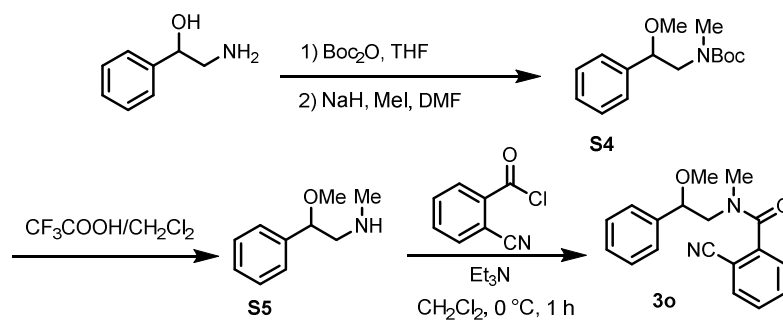

Step 1 and 2: To a solution of 2-amino-1-phenylethan-1-ol (548 mg, 4.0 mmol) in THF (10 mL) at 0 °C was added  $\text{Boc}_2\text{O}$  (959 mg, 4.4 mmol, dissolved in 5.0 mL THF). The mixture was then stirred at 0 °C for 0.5 h. After removal of the solvent, the residue was redissolved in DMF (20 mL) and cooled to 0 °C. To this solution was added NaH (60% in mineral oil, 480 mg, 12 mmol) and the reaction was stirred for 0.5 h at 0 °C. Then MeI (1.7 g, 12 mmol) was added dropwise to the reaction and the solution was stirred for another 2 h while gradually warmed to room temperature. The reaction was then quenched with water (40 mL). The aqueous phase was extracted with EtOAc (20 mL  $\times$  3). The combined organic phase was dried over anhydrous  $\text{Na}_2\text{SO}_4$  and concentrated under reduced pressure. The residue was purified by flash silica gel chromatography with petroleum ether/EtOAc (10:1) to afford product **S4** (890 mg, 84% for two steps) as a colorless oil. **S4**:  $^1\text{H}$  NMR (400 MHz,  $\text{CDCl}_3$ )  $\delta$  7.41-7.26 (m, 5H), 4.52-4.26 (m, 1H), 3.49-3.37 (m, 1H), 3.37-3.28 (m, 1H), 3.24 (s, 3H), 2.96-2.68 (m, 3H), 1.51-1.34 (m, 9H);  $^{13}\text{C}$  NMR (101 MHz,  $\text{CDCl}_3$ )  $\delta$  156.0, 155.7, 140.0, 128.6, 128.5, 128.0, 127.9, 126.8, 83.3, 82.6, 79.5, 57.2, 55.9, 36.7, 36.1, 28.5.

Step 3: To a solution of **S4** in  $\text{CH}_2\text{Cl}_2$  (10 mL) was dropwise added  $\text{CF}_3\text{COOH}$  (10 mL) at room temperature. The reaction was then stirred for 30 minutes and the solvent was removed under reduced pressure. To the residue was added  $\text{H}_2\text{O}$  (20 mL) and NaOH solution (1 N, 10 mL), and the aqueous phase was extracted with  $\text{CH}_2\text{Cl}_2$  (20 mL  $\times$  3). The combined organic phase was dried over anhydrous  $\text{Na}_2\text{SO}_4$  and concentrated under reduced pressure to yield **S5** (488 mg, 88%). **S5**:  $^1\text{H}$  NMR (400 MHz,  $\text{CDCl}_3$ )  $\delta$  7.40-7.29 (m, 5H), 4.40 (dd,  $J = 9.1, 3.5$  Hz, 1H), 3.27 (s, 3H), 2.92-2.71 (m, 3H), 2.51 (s, 3H);  $^{13}\text{C}$  NMR (101 MHz,  $\text{CDCl}_3$ )  $\delta$  139.9, 128.7, 128.2, 126.8, 82.4, 58.3, 57.0, 36.0.

Step 4: **3o** was then prepared with the same procedure as the preparation for substrate **1** in **Section 2.1**.

Preparation for substrate **3p**:

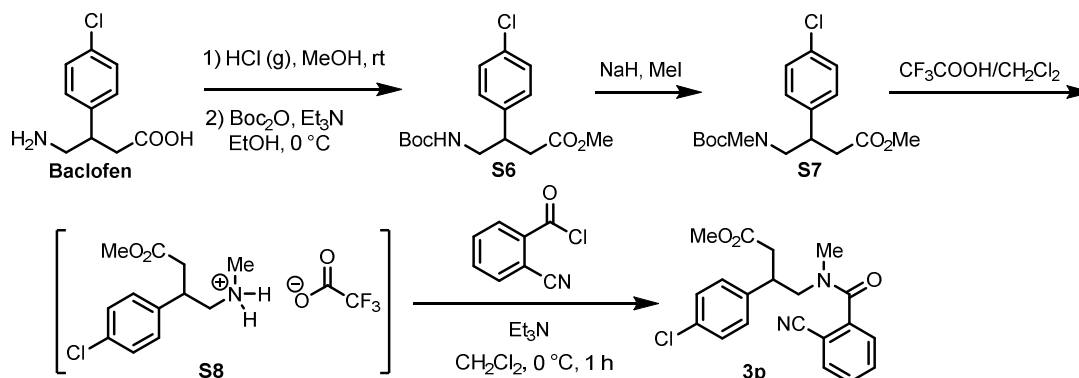

Step 1: To a suspension of baclofen [(*RS*)-4-amino-3-(4-chlorophenyl)butanoic acid] (500 mg, 2.5 mmol) in MeOH (10 mL) was bubbled with HCl gas (generated by adding concentrated H<sub>2</sub>SO<sub>4</sub> dropwise to NaCl solid) until a clear solution was observed. Then HCl was bubbled for another 10 min, and the solution was evaporated to give methyl (*RS*)-4-amino-3-(4-chlorophenyl)-butanoate·HCl (590 mg) as colorless crystal. Then the salt (590 mg, 2.2 mmol) was directly dissolved in EtOH (30 mL) without further purification. To this solution was added a solution of Et<sub>3</sub>N (1.0 mL, 7.5 mmol) and Boc<sub>2</sub>O (1.3 g, 6.2 mmol) in EtOH (8 mL) at 0 °C. The reaction was stirred at 0 °C for 2 h. After evaporation of EtOH, the residue was dissolved in a mixture of H<sub>2</sub>O (20 mL) and EtOAc (20 mL). The organic phase was separated and the aqueous phase was extracted with EtOAc (20 mL × 2). The combined organic phase was dried over anhydrous Na<sub>2</sub>SO<sub>4</sub> and concentrated under reduced pressure to yield **S6** (688 mg, 84%). **S6** is a known compound,<sup>S2</sup> a sample of **S6** was purified by silica gel chromatography with petroleum ether/EtOAc (10:1). **S6**: <sup>1</sup>H NMR (400 MHz, CDCl<sub>3</sub>) δ 7.29 (d, *J* = 8.4 Hz, 2H), 7.15 (d, *J* = 8.1 Hz, 2H), 4.59 (brs, 1H), 3.59 (s, 3H), 3.49-3.36 (m, 1H), 3.36-3.20 (m, 2H), 2.70 (dd, *J* = 15.7, 6.1 Hz, 1H), 2.58 (dd, *J* = 15.7, 8.1 Hz, 1H), 1.40 (s, 9H); <sup>13</sup>C NMR (101 MHz, CDCl<sub>3</sub>) δ 172.3, 155.9, 139.8, 132.9, 129.0, 128.9, 79.5, 51.8, 45.6, 41.9, 38.1, 28.4.

Step 2: To a solution of **S6** (656 mg, 2.0 mmol, directly synthesized as above without further purification) in DMF (8 mL) at 0 °C was added NaH (60% in mineral oil, 120 mg, 3 mmol, 1.5 equiv). After stirring at 0 °C for 0.5 h, MeI (250 μL, 4 mmol, 2 equiv) was added dropwise. The solution was stirred for another 2 h while gradually warmed to room temperature. Then the reaction was diluted with EtOAc (30 mL) and quenched with water (20 mL). After removing the organic phase, the aqueous phase was extracted again with EtOAc twice (30 mL × 2). The combined organic extract was washed with brine, dried over Na<sub>2</sub>SO<sub>4</sub> and concentrated *in vacuo*. The residue was purified by silica gel chromatography with petroleum ether/EtOAc (10:1) to afford **S7** (570 mg, 83%). **S7** (some peaks are broad due to existence of rotamers): <sup>1</sup>H NMR (400 MHz, CDCl<sub>3</sub>) δ 7.27 (d, *J* = 7.1 Hz, 2H), 7.21-7.08 (brm, 2H), 3.67-3.38 (brm, 5H), 3.37-3.20 (m, 1H), 2.83-2.64 (m, 4H), 2.59 (dd, *J* = 15.8, 8.2 Hz, 1H), 1.40 (s, 9H).

Step 3 and 4: **S7** (115 mg, 0.34 mmol) was dissolved in CH<sub>2</sub>Cl<sub>2</sub> (5 mL) and cooled to 0 °C. CF<sub>3</sub>COOH (5 mL) was added dropwise and the solution was stirred for another 30 min at 0 °C. Then the solvent was removed under reduced pressure to yield **S8**. [Note: attempt to neutralize and purify **S8** without forming a CF<sub>3</sub>COOH salt failed since a corresponding lactam would be gradually formed from attacking of the methyl ester by the free methyl amine.] Without further purification, the residue was dissolved in CH<sub>2</sub>Cl<sub>2</sub> (5 mL) under N<sub>2</sub> atmosphere and cooled to 0 °C. 2-Cyanobenzoyl chloride (prepared using the method described in **Section 2.1** using 2-cyanobenzoic acid and oxalyl chloride, 0.4 mmol, dissolved in 5 mL CH<sub>2</sub>Cl<sub>2</sub>) was added,

followed by the addition of Et<sub>3</sub>N (140 μL, 1 mmol) dropwise. After stirring for 1 h at 0 °C, the reaction mixture was diluted with CH<sub>2</sub>Cl<sub>2</sub> (20 mL) and washed with H<sub>2</sub>O (20 mL). The organic phase was dried over anhydrous Na<sub>2</sub>SO<sub>4</sub> and concentrated under reduced pressure. The residue was purified by silica gel chromatography with petroleum ether/EtOAc (2:1) to afford **3p** (103 mg, 81%).

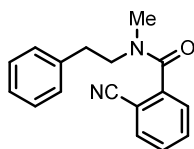

**3a**

**2-Cyano-*N*-methyl-*N*-phenethylbenzamide:** The two rotamers' ratio is about 1:1. <sup>1</sup>H NMR (400 MHz, CDCl<sub>3</sub>) δ 7.71 (d, *J* = 7.8 Hz, 0.50H), 7.63 (t, *J* = 7.1 Hz, 0.98H), 7.54-7.40 (m, 1.55H), 7.40-7.29 (m, 2.51H), 7.28-7.20 (m, 1.95H), 7.01-6.87 (m, 0.98H), 6.75 (dd, *J* = 6.4, 2.4 Hz, 0.49H), 3.82 (t, *J* = 7.6 Hz, 1.00H), 3.44 (t, *J* = 7.0 Hz, 1.00H), 3.21 (s, 1.52H), 3.05 (dd, *J* = 8.6, 6.7 Hz, 1.02H), 2.87-2.76 (m, 2.56H); <sup>13</sup>C NMR (101 MHz, CDCl<sub>3</sub>) δ 168.0, 167.6, 140.8, 140.4, 138.8, 137.7, 133.1, 133.0, 132.9, 132.6, 129.5, 129.2, 129.0, 128.9, 128.9, 128.6, 127.6, 127.4, 126.9, 126.6, 116.9, 116.8, 110.0, 109.8, 52.6, 49.5, 37.4, 34.5, 33.4, 33.0; HRMS (*m/z*, ESI-TOF): Calcd for C<sub>17</sub>H<sub>17</sub>N<sub>2</sub>O<sup>+</sup> [M+H<sup>+</sup>] 265.1335, found 265.1336.

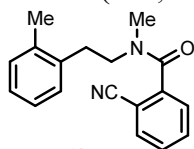

**3b**

**2-Cyano-*N*-methyl-*N*-(2-methylphenethyl)benzamide:** The two rotamers' ratio is about 1:1. <sup>1</sup>H NMR (400 MHz, CDCl<sub>3</sub>) δ 7.75-7.58 (m, 1.44H), 7.55-7.35 (m, 2.00H), 7.30-6.99 (m, 3.53H), 6.91 (d, *J* = 7.1 Hz, 0.51H), 6.85-6.78 (m, 0.50H), 3.80-3.69 (m, 0.93H), 3.38 (t, *J* = 7.2 Hz, 1.07H), 3.23 (s, 1.58H), 3.10-3.01 (m, 0.93H), 2.87 (s, 1.39H), 2.81 (t, *J* = 7.2 Hz, 1.07H), 2.43 (s, 1.38H), 1.93 (s, 1.55H); <sup>13</sup>C NMR (101 MHz, CDCl<sub>3</sub>) δ 167.9, 167.5, 140.7, 140.4, 136.8, 136.5, 136.1, 135.6, 133.1, 132.9, 132.6, 130.6, 130.5, 129.8, 129.6, 129.5, 129.2, 127.6, 127.4, 127.1, 126.8, 126.4, 126.2, 116.9, 116.8, 110.0, 109.8, 51.2, 48.4, 37.2, 33.1, 32.0, 30.8, 19.3, 18.8; HRMS (*m/z*, ESI-TOF): Calcd for C<sub>18</sub>H<sub>19</sub>N<sub>2</sub>O<sup>+</sup> [M+H<sup>+</sup>] 279.1492, found 279.1497.

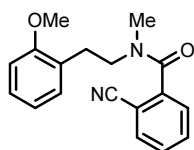

**3c**

**2-Cyano-*N*-(2-methoxyphenethyl)-*N*-methylbenzamide:** The two rotamers' ratio is about 2:1. <sup>1</sup>H NMR (400 MHz, CDCl<sub>3</sub>) δ 7.69 (d, *J* = 7.8 Hz, 0.32H), 7.66-7.58 (m, 0.96H), 7.50-7.39 (m, 1.63H), 7.35 (d, *J* = 7.7 Hz, 0.31H), 7.29-7.17 (m, 1.46H), 6.97-6.77 (m, 2.60H), 6.72 (d, *J* = 8.2 Hz, 0.64H), 3.86 (s, 0.97H), 3.84-3.77 (m, 0.69H), 3.54 (s, 1.97H), 3.43 (t, *J* = 6.9 Hz, 1.31H), 3.21 (s, 1.94H), 3.09-3.01 (m, 0.66H), 2.86-2.76 (m, 2.29H); <sup>13</sup>C NMR (101 MHz, CDCl<sub>3</sub>) δ 167.8, 167.3, 157.6, 157.4, 140.8, 140.4, 132.9, 132.8, 132.6, 132.3, 130.7, 130.6, 129.2, 128.8, 128.2, 127.8, 127.6, 127.2, 127.0, 125.7, 120.5, 120.5, 116.8, 110.2, 110.2, 109.8, 109.7, 55.2, 54.8, 50.6, 47.5, 37.1, 32.8, 29.4, 28.2; HRMS (*m/z*, ESI-TOF): Calcd for C<sub>18</sub>H<sub>19</sub>N<sub>2</sub>O<sub>2</sub><sup>+</sup> [M+H<sup>+</sup>] 295.1441, found 295.1442.

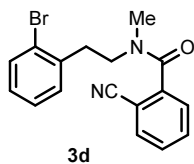

3d

**N-(2-bromophenethyl)-2-Cyano-N-methylbenzamide:** The two rotamers' ratio is about 1:1.  $^1\text{H}$  NMR (400 MHz,  $\text{CDCl}_3$ )  $\delta$  7.70 (d,  $J = 7.7$  Hz, 0.48H), 7.68-7.61 (m, 0.97H), 7.58-7.37 (m, 3.47H), 7.28 (t,  $J = 7.5$  Hz, 0.54H), 7.22 (t,  $J = 7.4$  Hz, 0.57H), 7.10 (t,  $J = 7.6$  Hz, 1.02H), 7.05 (d,  $J = 7.5$  Hz, 0.52H), 6.86 (d,  $J = 7.4$  Hz, 0.53H), 3.88-3.76 (m, 0.92H), 3.49 (t,  $J = 7.1$  Hz, 1.06H), 3.23 (s, 1.58H), 3.19 (t,  $J = 7.6$  Hz, 0.94H), 2.93 (t,  $J = 7.1$  Hz, 1.04H), 2.85 (s, 1.36H);  $^{13}\text{C}$  NMR (101 MHz,  $\text{CDCl}_3$ )  $\delta$  167.8, 167.4, 140.3, 139.9, 137.9, 136.6, 132.9, 132.8, 132.8, 132.7, 132.5, 131.2, 131.0, 129.3, 129.2, 128.6, 128.3, 127.7, 127.6, 127.3, 127.1, 124.3, 124.2, 116.7, 116.7, 109.6, 109.6, 50.2, 47.5, 37.2, 34.6, 33.4, 32.9; HRMS (m/z, ESI-TOF): Calcd for  $\text{C}_{17}\text{H}_{16}\text{BrN}_2\text{O}^+$   $[\text{M}+\text{H}^+]$  343.0441, found 343.0448.

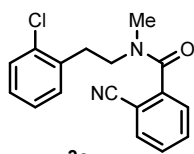

3e

**N-(2-chlorophenethyl)-2-cyano-N-methylbenzamide:** The two rotamers' ratio is about 1:1.  $^1\text{H}$  NMR (400 MHz,  $\text{CDCl}_3$ )  $\delta$  7.61 (d,  $J = 7.7$  Hz, 0.47H), 7.59-7.51 (m, 0.96H), 7.45-7.24 (m, 2.89H), 7.18-7.05 (m, 2.51H), 6.97 (dd,  $J = 6.2, 2.8$  Hz, 0.51H), 6.80 (d,  $J = 7.3$  Hz, 0.50H), 3.73 (dd,  $J = 8.5, 6.5$  Hz, 0.92H), 3.39 (t,  $J = 7.1$  Hz, 1.06H), 3.17-3.06 (m, 2.49H), 2.85 (t,  $J = 7.0$  Hz, 1.08H), 2.75 (s, 1.40H);  $^{13}\text{C}$  NMR (101 MHz,  $\text{CDCl}_3$ )  $\delta$  168.0, 167.6, 140.6, 140.2, 136.4, 135.1, 134.1, 134.0, 133.1, 133.0, 132.9, 132.6, 131.5, 131.2, 129.7, 129.6, 129.5, 129.3, 128.5, 128.2, 127.5, 127.3, 127.3, 127.2, 116.8, 116.8, 109.9, 109.8, 50.4, 47.7, 37.3, 33.1, 32.6, 31.2; HRMS (m/z, ESI-TOF): Calcd for  $\text{C}_{17}\text{H}_{16}\text{ClN}_2\text{O}^+$   $[\text{M}+\text{H}^+]$  299.0946, found 299.0957.

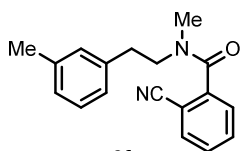

3f

**2-Cyano-N-methyl-N-(3-methylphenethyl)benzamide:** The two rotamers' ratio is about 45:55.  $^1\text{H}$  NMR (400 MHz,  $\text{CDCl}_3$ )  $\delta$  7.70 (d,  $J = 7.8$  Hz, 0.45H), 7.67-7.59 (m, 0.93H), 7.54-7.40 (m, 1.46H), 7.37 (d,  $J = 7.7$  Hz, 0.45H), 7.21 (t,  $J = 7.5$  Hz, 0.48H), 7.17-7.07 (m, 1.42H), 7.04 (d,  $J = 7.3$  Hz, 0.99H), 6.82-6.69 (m, 1.46H), 3.79 (dd,  $J = 8.4, 7.0$  Hz, 0.93H), 3.42 (t,  $J = 6.9$  Hz, 1.07H), 3.20 (s, 1.50H), 3.00 (dd,  $J = 8.8, 6.6$  Hz, 0.95H), 2.82 (s, 1.42H), 2.77 (t,  $J = 7.0$  Hz, 1.10H), 2.34 (s, 1.51H), 2.26 (s, 1.46H);  $^{13}\text{C}$  NMR (101 MHz,  $\text{CDCl}_3$ )  $\delta$  168.0, 167.5, 140.8, 140.4, 138.7, 138.4, 138.2, 137.6, 133.1, 133.0, 132.8, 132.6, 129.8, 129.6, 129.5, 129.2, 128.7, 128.5, 127.7, 127.6, 127.4, 127.3, 126.0, 125.9, 116.9, 116.9, 110.0, 109.8, 52.7, 49.6, 37.4, 34.4, 33.3, 32.9, 21.43, 21.36; HRMS (m/z, ESI-TOF): Calcd for  $\text{C}_{18}\text{H}_{19}\text{N}_2\text{O}^+$   $[\text{M}+\text{H}^+]$  279.1492, found 279.1492.

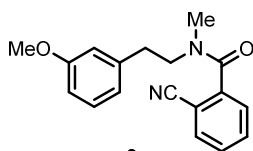

3g

**2-Cyano-N-(3-methoxyphenethyl)-N-methylbenzamide:** The two rotamers' ratio is about 1:1.  $^1\text{H}$  NMR (400 MHz,  $\text{CDCl}_3$ )  $\delta$  7.65 (d,  $J = 7.8$  Hz, 0.51H), 7.62-7.53 (m, 0.99H), 7.49-7.36 (m, 1.50H), 7.33 (d,  $J = 7.7$  Hz, 0.50H), 7.20 (t,  $J = 7.9$  Hz, 0.51H), 7.12 (t,  $J = 7.9$  Hz, 0.49H), 6.87 (d,  $J = 7.6$  Hz, 0.50H), 6.83 (s, 0.50H), 6.79 (d,  $J = 7.4$  Hz, 0.49H), 6.74



(dt,  $J = 8.0, 3.0$  Hz, 0.97H), 6.51 (d,  $J = 7.5$  Hz, 0.49H), 6.41 (s, 0.47H), 3.81-3.73 (m, 2.54H), 3.68 (s, 1.48H), 3.39 (t,  $J = 6.9$  Hz, 0.97H), 3.14 (s, 1.48H), 2.98 (t,  $J = 7.6$  Hz, 1.03H), 2.77 (s, 1.49H), 2.74 (t,  $J = 6.9$  Hz, 0.98H);  $^{13}\text{C}$  NMR (101 MHz,  $\text{CDCl}_3$ )  $\delta$  167.8, 167.4, 159.8, 159.7, 140.5, 140.3, 140.2, 139.0, 133.0, 132.8, 132.7, 132.5, 129.7, 129.5, 129.4, 129.1, 127.5, 127.1, 121.1, 121.0, 116.8, 116.7, 114.3, 112.1, 112.0, 109.7, 109.5, 55.1, 55.0, 52.4, 49.2, 37.2, 34.3, 33.3, 32.7; HRMS ( $m/z$ , ESI-TOF): Calcd for  $\text{C}_{18}\text{H}_{19}\text{N}_2\text{O}_2^+$   $[\text{M}+\text{H}^+]$  295.1441, found 295.1447.

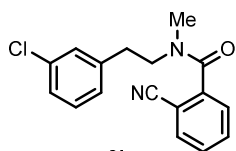

3h

***N*-(3-chlorophenethyl)-2-cyano-*N*-methylbenzamide:** The two rotamers' ratio is about 3:2.  $^1\text{H}$  NMR (400 MHz,  $\text{CDCl}_3$ )  $\delta$  7.71 (d,  $J = 7.7$  Hz, 0.57H), 7.65 (t,  $J = 7.9$  Hz, 0.97H), 7.56-7.44 (m, 1.51H), 7.39 (d,  $J = 7.7$  Hz, 0.58H), 7.34-7.16 (m, 3.39H), 6.91-6.79 (m, 1.26H), 3.80 (t,  $J = 7.5$  Hz, 1.14H), 3.45 (t,  $J = 6.7$  Hz, 0.88H), 3.20 (s, 1.33H), 3.02 (t,  $J = 7.5$  Hz, 1.14H), 2.84 (s, 1.67H), 2.80 (t,  $J = 6.8$  Hz, 0.91H);  $^{13}\text{C}$  NMR (101 MHz,  $\text{CDCl}_3$ )  $\delta$  167.5, 167.2, 140.5, 140.0, 139.7, 139.4, 134.0, 133.7, 132.8, 132.6, 132.6, 132.3, 129.7, 129.6, 129.2, 129.1, 128.6, 128.4, 127.0, 126.9, 126.8, 126.6, 126.3, 116.5, 116.4, 109.3, 109.2, 51.7, 48.6, 36.9, 33.6, 32.5, 32.4; HRMS ( $m/z$ , ESI-TOF): Calcd for  $\text{C}_{17}\text{H}_{16}\text{ClN}_2\text{O}^+$   $[\text{M}+\text{H}^+]$  299.0946, found 299.0946.

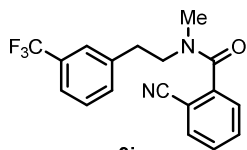

3i

**2-Cyano-*N*-methyl-*N*-(3-(trifluoromethyl)phenethyl)benzamide:** The two rotamers' ratio is about 3:2.  $^1\text{H}$  NMR (400 MHz,  $\text{CDCl}_3$ )  $\delta$  7.70 (d,  $J = 7.7$  Hz, 0.61H), 7.64 (t,  $J = 7.5$  Hz, 0.98H), 7.58-7.40 (m, 4.25H), 7.37 (t,  $J = 7.2$  Hz, 0.95H), 7.17 (d,  $J = 7.6$  Hz, 0.37H), 7.13 (s, 0.33H), 6.80 (dd,  $J = 6.6, 2.1$  Hz, 0.35H), 3.81 (dd,  $J = 8.7, 6.5$  Hz, 1.14H), 3.47 (t,  $J = 6.9$  Hz, 0.83H), 3.20 (s, 1.12H), 3.10 (t,  $J = 7.7$  Hz, 1.17H), 2.88 (t,  $J = 7.0$  Hz, 0.77H), 2.84 (s, 1.75H);  $^{13}\text{C}$  NMR (101 MHz,  $\text{CDCl}_3$ )  $\delta$  167.8, 167.6, 140.3, 140.0, 139.7, 138.6, 133.1, 132.8, 132.6, 132.4, 132.3, 130.6 (q,  $J_{\text{C-F}} = 32.0$  Hz), 130.5 (q,  $J_{\text{C-F}} = 32.1$  Hz), 129.5, 129.4, 129.2, 129.0, 127.1, 125.4 (q,  $J_{\text{C-F}} = 4.0$  Hz), 125.2 (q,  $J_{\text{C-F}} = 3.1$  Hz), 124.1 (q,  $J_{\text{C-F}} = 273.2$  Hz), 123.9 (q,  $J_{\text{C-F}} = 273.6$  Hz), 123.59 (q,  $J_{\text{C-F}} = 3.7$  Hz), 123.28 (q,  $J_{\text{C-F}} = 3.9$  Hz), 116.7, 116.7, 109.7, 109.6, 52.1, 49.0, 37.1, 34.1, 32.9, 32.7; HRMS ( $m/z$ , ESI-TOF): Calcd for  $\text{C}_{18}\text{H}_{16}\text{F}_3\text{N}_2\text{O}^+$   $[\text{M}+\text{H}^+]$  333.1209, found 333.1221.

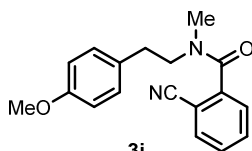

3j

**2-Cyano-*N*-(4-methoxyphenethyl)-*N*-methylbenzamide:** The two rotamers' ratio is about 1:1.  $^1\text{H}$  NMR (400 MHz,  $\text{CDCl}_3$ )  $\delta$  7.66 (d,  $J = 7.7$  Hz, 0.51H), 7.60 (t,  $J = 6.9$  Hz, 0.96H), 7.50-7.37 (m, 1.48H), 7.34 (d,  $J = 7.7$  Hz, 0.47H), 7.20 (d,  $J = 8.3$  Hz, 0.97H), 6.89-6.71 (m, 2.45H), 6.75 (d,  $J = 8.5$  Hz, 0.96H), 3.82-3.66 (m, 4.00H), 3.36 (t,  $J = 6.9$  Hz, 0.96H), 3.15 (s, 1.46H), 2.95 (t,  $J = 7.5$  Hz, 0.99H), 2.77 (s, 1.45H), 2.72 (t,  $J = 6.9$  Hz, 1.02H);  $^{13}\text{C}$  NMR (101 MHz,  $\text{CDCl}_3$ )  $\delta$  167.9, 167.4, 158.5, 158.2, 140.7, 140.3, 133.0, 132.9, 132.8, 132.6, 130.7, 129.8, 129.7, 129.6, 129.4, 129.2, 127.5, 127.2, 116.8, 116.8, 114.1, 114.0, 109.8, 109.6, 55.3, 55.2, 52.7, 49.6, 37.3, 33.5, 32.8, 32.4; HRMS ( $m/z$ , ESI-TOF): Calcd for  $\text{C}_{18}\text{H}_{19}\text{N}_2\text{O}_2^+$   $[\text{M}+\text{H}^+]$  295.1441, found 295.1443.

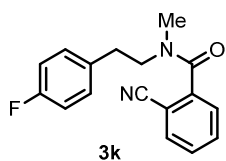

**2-Cyano-*N*-(4-fluorophenethyl)-*N*-methylbenzamide:** The two rotamers' ratio is about 54:46.  $^1\text{H}$  NMR (400 MHz,  $\text{CDCl}_3$ )  $\delta$  7.70 (d,  $J = 7.7$  Hz, 0.54H), 7.64 (t,  $J = 7.9$  Hz, 0.98H), 7.56-7.40 (m, 1.46H), 7.37 (d,  $J = 7.7$  Hz, 0.54H), 7.28 (t,  $J = 6.8$  Hz, 1.21H), 7.01 (t,  $J = 8.5$  Hz, 1.14H), 6.95-6.86 (m, 2.02H), 3.78 (t,  $J = 7.6$  Hz, 1.12H), 3.42 (t,  $J = 6.9$  Hz, 0.85H), 3.19 (s, 1.25H), 3.02 (t,  $J = 7.5$  Hz, 1.12H), 2.88-2.74 (m, 2.63H);  $^{13}\text{C}$  NMR (101 MHz,  $\text{CDCl}_3$ )  $\delta$  168.0, 167.6, 161.9 (d,  $J_{\text{C-F}} = 246$  Hz), 161.7 (d,  $J_{\text{C-F}} = 245$  Hz), 140.6, 140.3, 134.5 (d,  $J_{\text{C-F}} = 3$  Hz), 133.4 (d,  $J_{\text{C-F}} = 3$  Hz), 133.1 (d,  $J_{\text{C-F}} = 16$  Hz), 132.8 (d,  $J_{\text{C-F}} = 16$  Hz), 130.4, 130.4, 130.3, 130.3, 129.5, 129.4, 127.5, 127.3, 116.9, 116.8, 115.7 (d,  $J_{\text{C-F}} = 21$  Hz), 115.4 (d,  $J_{\text{C-F}} = 21$  Hz), 110.0, 109.8, 52.7, 49.5, 37.4, 33.7, 33.0, 32.6; HRMS ( $m/z$ , ESI-TOF): Calcd for  $\text{C}_{17}\text{H}_{16}\text{FN}_2\text{O}^+$   $[\text{M}+\text{H}^+]$  283.1241, found 283.1242.

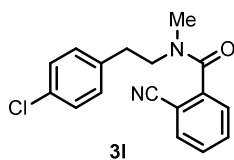

***N*-(4-chlorophenethyl)-2-cyano-*N*-methylbenzamide:** The two rotamers' ratio is about 56:44.  $^1\text{H}$  NMR (400 MHz,  $\text{CDCl}_3$ )  $\delta$  7.70 (d,  $J = 7.8$  Hz, 0.56H), 7.64 (t,  $J = 7.2$  Hz, 0.97H), 7.55-7.42 (m, 1.41H), 7.37 (d,  $J = 7.7$  Hz, 0.57H), 7.33-7.16 (m, 3.19H), 6.88 (t,  $J = 8.4$  Hz, 1.19H), 3.86-3.73 (m, 1.16H), 3.42 (t,  $J = 7.0$  Hz, 0.83H), 3.18 (s, 1.22H), 3.06-2.97 (m, 1.17H), 2.82 (s, 1.73H), 2.79 (t,  $J = 7.0$  Hz, 0.83H);  $^{13}\text{C}$  NMR (101 MHz,  $\text{CDCl}_3$ )  $\delta$  167.9, 167.6, 140.6, 140.2, 137.3, 136.2, 133.2, 133.0, 133.0, 132.8, 132.7, 132.4, 130.4, 130.2, 129.6, 129.4, 129.0, 128.8, 127.6, 127.3, 116.9, 116.8, 109.9, 109.8, 52.5, 49.4, 37.4, 33.9, 33.0, 32.7; HRMS ( $m/z$ , ESI-TOF): Calcd for  $\text{C}_{17}\text{H}_{16}\text{ClN}_2\text{O}^+$   $[\text{M}+\text{H}^+]$  299.0946, found 299.0947.

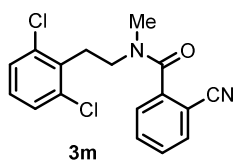

**2-Cyano-*N*-(2,6-dichlorophenethyl)-*N*-methylbenzamide:** The two rotamers' ratio is about 2:1.  $^1\text{H}$  NMR (400 MHz,  $\text{CDCl}_3$ )  $\delta$  7.74-7.61 (m, 1.28H), 7.57 (t,  $J = 7.6$  Hz, 0.63H), 7.54-7.43 (m, 1.32H), 7.32 (d,  $J = 8.0$  Hz, 0.65H), 7.28-7.23 (m, 1.23H), 7.20 (d,  $J = 8.0$  Hz, 1.20H), 7.15-7.04 (m, 0.99H), 3.83 (t,  $J = 7.3$  Hz, 0.68H), 3.48-3.35 (m, 1.96H), 3.29 (s, 1.87H), 3.15 (t,  $J = 7.8$  Hz, 1.28H), 2.93 (s, 1.04H);  $^{13}\text{C}$  NMR (101 MHz,  $\text{CDCl}_3$ )  $\delta$  167.9, 167.6, 140.6, 140.4, 135.9, 135.7, 134.9, 133.3, 133.1, 133.0, 132.9, 132.9, 129.5, 129.4, 128.7, 128.4, 128.4, 127.5, 116.8, 110.2, 110.0, 48.9, 46.1, 37.2, 33.3, 30.2, 28.9; HRMS ( $m/z$ , ESI-TOF): Calcd for  $\text{C}_{17}\text{H}_{15}\text{Cl}_2\text{N}_2\text{O}^+$   $[\text{M}+\text{H}^+]$  333.0556, found 333.0567.

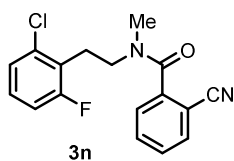

***N*-(2-chloro-6-fluorophenethyl)-2-cyano-*N*-methylbenzamide:** The two rotamers' ratio is about 3:2.  $^1\text{H}$  NMR (400 MHz,  $\text{CDCl}_3$ )  $\delta$  7.74-7.60 (m, 1.36H), 7.56-7.40 (m, 1.94H), 7.23-7.11 (m, 1.53H), 7.10-6.96 (m, 1.61H), 6.92 (t,  $J = 8.7$  Hz, 0.61H), 3.83 (t,  $J = 7.1$

Hz, 0.75H), 3.44 (t,  $J = 7.3$  Hz, 1.19H), 3.30-3.18 (m, 2.56H), 3.01 (t,  $J = 7.2$  Hz, 1.19H), 2.89 (s, 1.16H);  $^{13}\text{C}$  NMR (101 MHz,  $\text{CDCl}_3$ )  $\delta$  167.9, 167.6, 161.8 (d,  $J_{\text{C-F}} = 248$  Hz), 161.7 (d,  $J_{\text{C-F}} = 249$  Hz), 140.6, 140.2, 135.5 (d,  $J_{\text{C-F}} = 6$  Hz), 135.4 (d,  $J_{\text{C-F}} = 6$  Hz), 133.1, 132.9, 132.8, 129.5, 129.4, 128.8 (d,  $J_{\text{C-F}} = 10$  Hz), 128.5 (d,  $J_{\text{C-F}} = 10$  Hz), 127.4 (d,  $J_{\text{C-F}} = 4$  Hz), 125.4 (d,  $J_{\text{C-F}} = 4$  Hz), 125.3, 124.9 (d,  $J_{\text{C-F}} = 19$  Hz), 123.4 (d,  $J_{\text{C-F}} = 19$  Hz), 116.8, 114.2 (d,  $J_{\text{C-F}} = 23$  Hz), 114.0 (d,  $J_{\text{C-F}} = 23$  Hz), 110.0, 109.9, 49.4, 46.6, 37.2, 33.1, 25.3 (d,  $J_{\text{C-F}} = 2$  Hz), 24.3 (d,  $J_{\text{C-F}} = 2$  Hz); HRMS ( $m/z$ , ESI-TOF): Calcd for  $\text{C}_{17}\text{H}_{15}\text{ClFN}_2\text{O}^+$  [ $\text{M}+\text{H}^+$ ] 317.0851, found 317.0861.

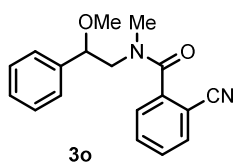

**3o** **2-Cyano-*N*-(2-methoxy-2-phenylethyl)-*N*-methylbenzamide:** The two rotamers' ratio is about 56:44.  $^1\text{H}$  NMR (400 MHz,  $\text{CDCl}_3$ )  $\delta$  7.72 (d,  $J = 7.8$  Hz, 0.56H), 7.70-7.60 (m, 1.00H), 7.59-7.35 (m, 4.39H), 7.36-7.26 (m, 1.91H), 7.18 (d,  $J = 7.6$  Hz, 0.44H), 7.09-6.97 (m, 0.88H), 4.72 (dd,  $J = 8.7, 3.9$  Hz, 0.56H), 4.29 (dd,  $J = 8.3, 4.2$  Hz, 0.44H), 3.95 (dd,  $J = 13.7, 3.9$  Hz, 0.56H), 3.55-3.43 (m, 1.03H), 3.38-3.17 (m, 4.86H), 2.93 (s, 1.73H);  $^{13}\text{C}$  NMR (101 MHz,  $\text{CDCl}_3$ )  $\delta$  168.6, 167.7, 140.6, 140.4, 139.4, 138.4, 132.9, 132.8, 132.6, 132.4, 129.3, 129.1, 128.6, 128.4, 128.2, 127.9, 127.8, 127.0, 126.6, 126.3, 116.8, 116.7, 110.3, 109.7, 82.0, 80.9, 57.2, 56.9, 56.8, 54.6, 38.9, 33.8; HRMS ( $m/z$ , ESI-TOF): Calcd for  $\text{C}_{18}\text{H}_{19}\text{N}_2\text{O}_2^+$  [ $\text{M}+\text{H}^+$ ] 295.1441, found 295.1447.

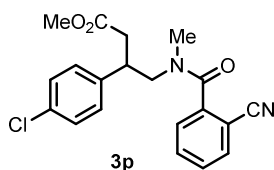

**3p** **Methyl 3-(4-chlorophenyl)-4-(2-cyano-*N*-methylbenzamido)butanoate:** The two rotamers' ratio is about 2:1.  $^1\text{H}$  NMR (400 MHz,  $\text{CDCl}_3$ )  $\delta$  7.69 (d,  $J = 7.7$  Hz, 0.68H), 7.67-7.56 (m, 1.04H), 7.55-7.42 (m, 1.42H), 7.36-7.28 (m, 2.68H), 7.22 (d,  $J = 8.3$  Hz, 0.68H), 7.16 (d,  $J = 7.6$  Hz, 0.69H), 6.88 (d,  $J = 8.3$  Hz, 0.65H), 6.83-6.74 (m, 0.29H), 3.99 (dd,  $J = 16.6, 10.5$  Hz, 0.71H), 3.73-3.63 (m, 1.47H), 3.63-3.56 (m, 3.00H), 3.56-3.30 (m, 1.09H), 3.14 (s, 0.94H), 2.92-2.82 (m, 0.75H), 2.78-2.63 (m, 2.80H), 2.59-2.42 (m, 0.69H);  $^{13}\text{C}$  NMR (101 MHz,  $\text{CDCl}_3$ )  $\delta$  172.1, 171.4, 168.1, 168.0, 140.4, 139.7, 139.6, 138.7, 133.5, 133.1, 133.1, 133.0, 132.6, 129.6, 129.5, 129.3, 129.2, 128.9, 128.2, 127.2, 116.9, 116.7, 109.9, 109.9, 56.5, 52.3, 52.0, 51.8, 39.9, 39.6, 38.3, 37.4, 33.6; HRMS ( $m/z$ , ESI-TOF): Calcd for  $\text{C}_{20}\text{H}_{20}\text{ClN}_2\text{O}_3^+$  [ $\text{M}+\text{H}^+$ ] 371.1157, found 371.1168.

## 2.2 Optimization of olefination reaction conditions.

### 2.2.1 Condition optimization for remote-selective ortho-*C-H* bond olefination: <sup>a</sup>

**General optimization procedure:** A 35 mL sealed tube or 50 mL Schlenk sealed tube (with a Teflon cap, Schlenk sealed tube was used when oxygen was the terminal oxidant) equipped with a magnetic stir bar was charged with amide **1a** (0.10 mmol, 1.0 equiv),  $\text{Pd}(\text{OAc})_2$  (2.3 mg, 0.010 mmol, 10 mol%), Ac-Gly-OH (2.4 mg, 0.020 mmol, 20 mol%), oxidant and solid additive (if additive was used) sequentially. The tube was then purged with oxygen (1 atm, if oxygen was used). *t*-Amyl-OH (0.5 mL) was added to the mixture, followed by ethyl acrylate (2.0 equiv) and HFIP (32  $\mu\text{L}$ , if used). And then another 0.5 mL of *t*-Amyl-OH was added along the inside wall of the tube. The tube was then capped under a flow of  $\text{O}_2$  (1 atm, if oxygen was used) and submerged into a preheated 90  $^\circ\text{C}$  oil bath. The reaction was stirred for 20–36 h and cooled to

room temperature. The crude reaction mixture was diluted with EtOAc (5 mL) and filtered through a short pad of Celite. The sealed tube and Celite pad were washed with an additional 20 mL of EtOAc. The filtrate was concentrated *in vacuo*, and crude  $^1\text{H}$  NMR spectrum was taken using  $\text{CH}_2\text{Br}_2$  as internal standard. (Note: all the chemicals are added as their pure form, for example, not in a solution.)

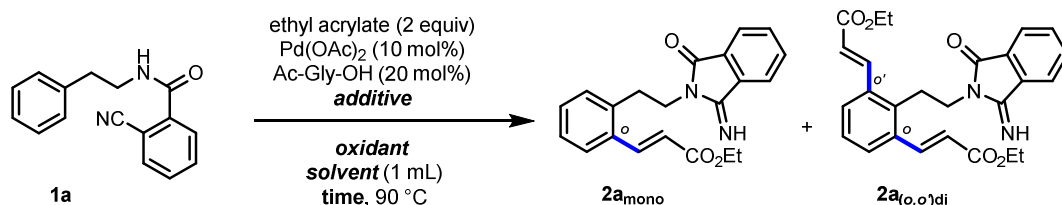

| Entry                 | t (h)     | oxidant (equiv)                         | additive (equiv)           | solvent                 | Yield of <b>3a<sub>mono</sub></b> (%) | Yield of <b>3a<sub>di(o,o')</sub></b> (%) |
|-----------------------|-----------|-----------------------------------------|----------------------------|-------------------------|---------------------------------------|-------------------------------------------|
| 1                     | 24        | AgOAc (3)                               | --                         | <i>t</i> -Amyl-OH       | 32                                    | 50                                        |
| 2                     | 24        | AgOAc (3)                               | --                         | toluene                 | 29                                    | 6                                         |
| <b>3</b>              | <b>20</b> | <b>Ag<sub>2</sub>CO<sub>3</sub> (3)</b> | --                         | <b><i>t</i>-Amyl-OH</b> | <b>40</b>                             | <b>55</b>                                 |
| 4                     | 20        | O <sub>2</sub> (1 atm)                  | Cu(OAc) <sub>2</sub> (0.3) | <i>t</i> -Amyl-OH       | 30                                    | 16                                        |
| 5                     | 20        | O <sub>2</sub> (1 atm)                  | HFIP (3)                   | <i>t</i> -Amyl-OH       | 33                                    | 40                                        |
| 6                     | 36        | air (1 atm)                             | HFIP (3)                   | <i>t</i> -Amyl-OH       | trace                                 | trace                                     |
| 7                     | 20        | O <sub>2</sub> (1 atm)                  | HFIP (3)                   | DCE                     | 0                                     | 0                                         |
| 8 <sup>b</sup>        | 20        | O <sub>2</sub> (1 atm)                  | HFIP (3)                   | <i>t</i> -Amyl-OH       | trace                                 | --                                        |
| 9                     | 36        | O <sub>2</sub> (1 atm)                  | HFIP (3)                   | <i>t</i> -Amyl-OH       | 33                                    | 34                                        |
| 10 <sup>c</sup>       | 20        | O <sub>2</sub> (1 atm)                  | HFIP (3)                   | <i>t</i> -Amyl-OH       | trace                                 | --                                        |
| <b>11<sup>d</sup></b> | <b>23</b> | <b>O<sub>2</sub> (1 atm)</b>            | <b>HFIP (3)</b>            | <b><i>t</i>-Amyl-OH</b> | <b>32</b>                             | <b>57</b>                                 |
| 12 <sup>d</sup>       | 23        | O <sub>2</sub> (1 atm)                  | --                         | <i>t</i> -Amyl-OH       | 40                                    | 14                                        |

<sup>a</sup> Conditions: **1a** (0.1 mmol), ethyl acrylate (0.2 mmol), Pd(OAc)<sub>2</sub> (10 mol%), Ac-Gly-OH (20 mol%). Yield was determined by  $^1\text{H}$  NMR analysis using  $\text{CH}_2\text{Br}_2$  as internal standard. <sup>b</sup> Ac-Ile-OH (20 mol%) was used instead of Ac-Gly-OH. <sup>c</sup> 10 mol% *p*-benzoquinone was added. <sup>d</sup> 0.2 mmol scale, Ag<sub>2</sub>CO<sub>3</sub> (30 mol%) was added and the isolated yields were reported for entry 11.

### 2.2.2 Condition optimization for remote meta-C–H bond olefination: <sup>a</sup>

**General optimization procedure:** A 35 mL sealed tube or 50 mL Schlenk sealed tube (with a Teflon cap, Schlenk sealed tube was used when the reaction was run under oxygen/nitrogen) equipped with a magnetic stir bar was charged with amide **3** (0.20 mmol, 1.0 equiv), Pd(OAc)<sub>2</sub> (4.6 mg, 0.020 mmol, 10 mol%), Ac-Gly-OH (4.7 mg, 0.040 mmol, 20 mol%) and AgOAc (100 mg, 0.60 mmol, 3 equiv). The tube was then purged with nitrogen (1 atm, if nitrogen was used). DCE (1.0 mL) was added to the mixture, followed by ethyl acrylate (2.0 equiv) [and DMF (77  $\mu\text{L}$ , 1.0 mmol, 5 equiv) when necessary as noted below]. And then 1.0 mL of HFIP was added

along the inside wall of the tube. The tube was then capped under a flow of nitrogen (if nitrogen was used) and submerged into a preheated 90 °C oil bath. The reaction was stirred for 24–48 h and cooled to room temperature. The crude reaction mixture was diluted with EtOAc (5 mL) and filtered through a short pad of Celite. The sealed tube and Celite pad were washed with an additional 20 mL of EtOAc. The filtrate was concentrated *in vacuo*, and crude <sup>1</sup>H NMR spectrum was taken using CH<sub>2</sub>Br<sub>2</sub> as internal standard. (Note: all the chemicals are added as their pure form, for example, not in a solution.)

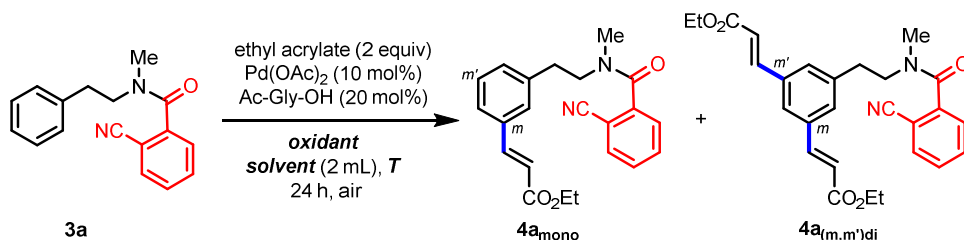

| Entry             | T (°C) | solvents [v/v]    | oxidant (equiv)                     | additive (equiv)                      | Yield of <b>4a<sub>mono</sub></b> (%) | Yield of <b>4a<sub>(m,m')<sub>di</sub></sub></b> (%) | <b>3a</b> (%) |
|-------------------|--------|-------------------|-------------------------------------|---------------------------------------|---------------------------------------|------------------------------------------------------|---------------|
| 1                 | 90     | <i>t</i> -Amyl-OH | O <sub>2</sub> (1 atm)              | Ag <sub>2</sub> CO <sub>3</sub> (0.3) | 10                                    | --                                                   | 90            |
| 2                 | 90     | HFIP              | AgOAc (3)                           | --                                    | 13                                    | 45                                                   | trace         |
| 3 <sup>b</sup>    | 90     | HFIP              | AgOAc (3)                           | --                                    | 17                                    | 24                                                   | trace         |
| 4 <sup>c</sup>    | 90     | HFIP              | AgOAc (3)                           | --                                    | messy mixture                         |                                                      | trace         |
| 5                 | 90     | DCE/HFIP [50/50]  | AgOAc (3)                           | --                                    | 32                                    | 39                                                   | trace         |
| 6                 | 90     | DCE/HFIP [85/15]  | AgOAc (3)                           | --                                    | 48                                    | 25                                                   | 10            |
| 7                 | 90     | DCE/HFIP [85/15]  | AgOAc (3)                           | KHCO <sub>3</sub> (2)                 | 26                                    | 0                                                    | 55            |
| 8                 | 90     | DCE/HFIP [85/15]  | AgOAc (3)                           | KH <sub>2</sub> PO <sub>4</sub> (2)   | 50                                    | 22                                                   | 15            |
| 9                 | 90     | DCE/HFIP [85/15]  | Ag <sub>2</sub> CO <sub>3</sub> (3) | --                                    | 40                                    | 31                                                   | 7             |
| 10 <sup>d</sup>   | 90     | DCE/HFIP [85/15]  | AgOAc (3)                           | --                                    | 44                                    | 27                                                   | 10            |
| 11 <sup>d</sup>   | 90     | DCE/HFIP [85/15]  | AgOAc (3)                           | DMF (5)                               | 44                                    | 42                                                   | trace         |
| 12                | 90     | DCE/HFIP [95/5]   | AgOAc (3)                           | --                                    | 32                                    | 7                                                    | 44            |
| 13                | 90     | DCE/HFIP [80/20]  | AgOAc (3)                           | --                                    | 42                                    | 33                                                   | 6             |
| 14                | 90     | DCE/HFIP [70/30]  | AgOAc (3)                           | --                                    | 43                                    | 31                                                   | trace         |
| 15 <sup>d</sup>   | 90     | DCE/HFIP [50/50]  | AgOAc (3)                           | --                                    | 46                                    | 37                                                   | trace         |
| 16 <sup>d,e</sup> | 80     | DCE/HFIP [50/50]  | AgOAc (3)                           | --                                    | 46                                    | 44                                                   | trace         |

|                     |    |                                                     |                          |         |       |    |       |
|---------------------|----|-----------------------------------------------------|--------------------------|---------|-------|----|-------|
| 17 <sup>d,f</sup>   | 80 | DCE/HFIP<br>[50/50]                                 | AgOAc (3)                | DMF (5) | 58    | 32 | trace |
| 18 <sup>d</sup>     | 90 | EtOAc/HFIP<br>[50/50]                               | AgOAc (3)                | --      | 42    | 18 | 15    |
| 19                  | 90 | CF <sub>3</sub> CH <sub>2</sub> OH                  | AgOAc (3)                | --      | 29    | 37 | trace |
| 20                  | 90 | CF <sub>3</sub> CH <sub>2</sub> OH/<br>HFIP [85/15] | AgOAc (3)                | --      | 34    | 35 | trace |
| 21                  | 90 | CF <sub>3</sub> CH <sub>2</sub> OH/<br>DCE [50/50]  | AgOAc (3)                | --      | 44    | 28 | 10    |
| 22 <sup>g</sup>     | 90 | DCE/HFIP<br>[50/50]                                 | Ag <sub>2</sub> O (3)    | DMF (5) | --    | -- | 95    |
| 23 <sup>g</sup>     | 90 | DCE/HFIP<br>[50/50]                                 | Cu(OAc) <sub>2</sub> (3) | DMF (5) | trace | -- | ~100  |
| 24 <sup>g,h</sup>   | 60 | DCE/HFIP<br>[50/50]                                 | AgOAc (2)                | --      | 61    | 14 | 25    |
| 25 <sup>g,h,i</sup> | 60 | DCE/HFIP<br>[50/50]                                 | AgOAc (2)                | --      | 61    | 13 | 25    |
| 26 <sup>e,g,j</sup> | 80 | DCE/HFIP<br>[50/50]                                 | AgOAc (3)                | --      | 54    | 8  | 32    |

<sup>a</sup> Conditions: **1a** (0.2 mmol), ethyl acrylate (0.4 mmol), Pd(OAc)<sub>2</sub> (10 mol%), Ac-Gly-OH (20 mol%). Yield was determined by <sup>1</sup>H NMR analysis using CH<sub>2</sub>Br<sub>2</sub> as internal standard. <sup>b</sup> Ac-Ile-OH (20 mol%) was used instead of Ac-Gly-OH. <sup>c</sup> Ac-Gly-OH was not added. <sup>d</sup> under N<sub>2</sub>. <sup>e</sup> 32 h. <sup>f</sup> 28 h. <sup>g</sup> 0.1 mmol scale. <sup>h</sup> ethyl acrylate (0.3 mmol); 48 h. <sup>i</sup> DCE/HFIP (0.25mL/0.25mL). <sup>j</sup> Pd(OAc)<sub>2</sub> (3 mol%), Ac-Gly-OH (6 mol%); DCE/HFIP (0.3mL/0.3mL).

### 2.3 General remote-selective *ortho*-C–H bond olefination procedure and characterization of olefinated compounds.

#### General remote-selective *ortho*-C–H bond olefination procedure:

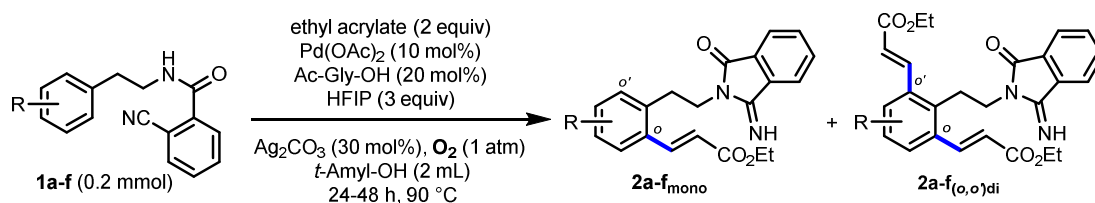

A 50 mL Schlenk sealed tube (with a Teflon cap) equipped with a magnetic stir bar was charged with amide **1** (0.20 mmol, 1.0 equiv), Pd(OAc)<sub>2</sub> (4.6 mg, 0.020 mmol, 10 mol%), Ac-Gly-OH (4.7 mg, 0.040 mmol, 20 mol%) and Ag<sub>2</sub>CO<sub>3</sub> (16 mg, 0.060 mmol, 0.3 equiv). The tube was then purged with oxygen. *t*-Amyl-OH (1.0 mL) and HFIP (63 μL) was added to the mixture, followed by ethyl acrylate (2.0 equiv). And then another 1.0 mL of *t*-Amyl-OH was added along the inside wall of the tube. The tube was then capped under a flow of O<sub>2</sub> and submerged into a preheated 90 °C oil bath. The reaction was stirred for 20–48 h and cooled to room temperature. The crude reaction mixture was diluted with EtOAc (5 mL) and filtered through a short pad of Celite. The sealed tube and Celite pad were washed with an additional 20 mL of EtOAc. The filtrate was concentrated *in vacuo*, and the resulting residue was purified by preparative thin layer chromatography using petroleum ether/EtOAc as the eluent.

### Preparation of Substrate **1a'**:

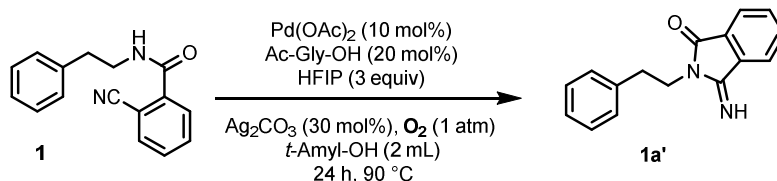

Substrate **1a'** was obtained in 85% yields (by <sup>1</sup>H NMR) using the above olefination procedure without adding ethyl acrylate in 24 h, or by heating with NaH (1.2 equiv) at 90 °C in THF for 1 h for large scale preparation in almost quantitative yield. The olefination reaction with **1a'** as the substrate using the above olefination procedure produced 32% of **2a<sub>mono</sub>** and 52% of **2a<sub>(o,o')di</sub>**, in 23 h, by <sup>1</sup>H NMR analysis using CH<sub>2</sub>Br<sub>2</sub> as internal standard.

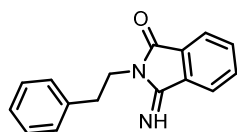

**1a'**

**3-Imino-2-phenylethylisoindolin-1-one:** <sup>1</sup>H NMR (400 MHz, CDCl<sub>3</sub>) δ 7.87-7.80 (m, 1H), 7.73 (d, *J* = 6.7 Hz, 1H), 7.65 (pd, *J* = 7.4, 1.3 Hz, 2H), 7.28 (d, *J* = 4.3 Hz, 4H), 7.25-7.16 (m, 1H), 4.06 (dd, *J* = 8.7, 6.8 Hz, 2H), 3.13-2.92 (m, 2H); <sup>13</sup>C NMR (101 MHz, CDCl<sub>3</sub>) δ 167.7, 160.2, 138.5, 132.9, 132.2, 131.0, 128.9, 128.5, 126.5, 123.1, 120.9, 39.7, 34.5.

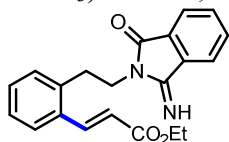

**2a<sub>mono</sub>**

**(E)-ethyl-3-(2-(2-(1-imino-3-oxoisoindolin-2-yl)ethyl)phenyl)acrylate:** The corresponding reaction was run with standard conditions for 24 h. <sup>1</sup>H NMR (400 MHz, CDCl<sub>3</sub>) δ 8.16 (d, *J* = 15.8 Hz, 1H), 7.80 (d, *J* = 7.1 Hz, 1H), 7.74-7.59 (m, 3H), 7.55 (d, *J* = 7.6 Hz, 1H), 7.32-7.21 (m, 3H), 6.27 (d, *J* = 15.7 Hz, 1H), 4.24 (q, *J* = 7.1 Hz, 2H), 4.03 (t, *J* = 7.3 Hz, 2H), 3.19 (t, *J* = 7.3 Hz, 2H), 1.35 (t, *J* = 7.1 Hz, 3H); <sup>13</sup>C NMR (101 MHz, CDCl<sub>3</sub>) δ 167.7, 166.9, 141.9, 138.4, 133.9, 133.0, 132.3, 131.1, 130.8, 130.3, 127.4, 126.8, 123.4, 120.9, 120.1, 60.6, 39.5, 31.9, 14.5; HRMS (*m/z*, ESI-TOF): Calcd for C<sub>21</sub>H<sub>21</sub>N<sub>2</sub>O<sub>3</sub><sup>+</sup> [M+H<sup>+</sup>] 349.1547, found 349.1547.

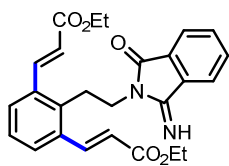

**2a<sub>(o,o')di</sub>**

**(2E,2'E)-diethyl-3,3'-(2-(2-(1-imino-3-oxoisoindolin-2-yl)ethyl)-1,3-phenylene)diacrylate:** <sup>1</sup>H NMR (400 MHz, CDCl<sub>3</sub>) δ 8.16 (d, *J* = 15.7 Hz, 2H), 7.77-7.72 (m, 1H), 7.68-7.55 (m, 3H), 7.52 (d, *J* = 7.8 Hz, 2H), 7.26 (t, *J* = 7.8 Hz, 1H), 6.21 (d, *J* = 15.7 Hz, 2H), 4.23 (q, *J* = 7.1 Hz, 4H), 3.99 (t, *J* = 7.0 Hz, 2H), 3.31 (t, *J* = 7.0 Hz, 2H), 1.34 (t, *J* = 7.1 Hz, 6H); <sup>13</sup>C NMR (101 MHz, CDCl<sub>3</sub>) δ 167.5, 166.5, 160.1, 141.9, 137.2, 135.3, 132.8, 132.2, 131.0, 128.5, 127.6, 123.3, 121.5, 120.9, 60.6, 38.5, 27.6, 14.4; HRMS (*m/z*, ESI-TOF): Calcd for C<sub>26</sub>H<sub>27</sub>N<sub>2</sub>O<sub>5</sub><sup>+</sup> [M+H<sup>+</sup>] 447.1914, found 447.1907.

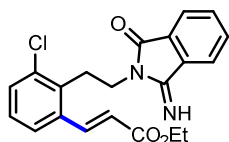

2b

**(E)-ethyl-3-(3-chloro-2-(2-(1-imino-3-oxoisindolin-2-yl)ethyl)phenyl)acrylate:**

The corresponding reaction was run with standard conditions at 80 °C for 36 h. <sup>1</sup>H NMR (400 MHz, CDCl<sub>3</sub>) δ 8.06 (d, *J* = 15.7 Hz, 1H), 7.75 (d, *J* = 7.0 Hz, 1H), 7.72-7.54 (m, 3H), 7.39 (d, *J* = 7.9 Hz, 1H), 7.36 (d, *J* = 7.8 Hz, 1H), 7.16 (t, *J* = 7.9 Hz, 1H), 6.07 (d, *J* = 15.7 Hz, 1H), 4.18 (q, *J* = 7.1 Hz, 2H), 4.05 (t, *J* = 6.5 Hz, 2H), 3.35 (t, *J* = 6.8 Hz, 2H), 1.31 (t, *J* = 7.1 Hz, 3H); <sup>13</sup>C NMR (101 MHz, CDCl<sub>3</sub>) δ 167.6, 166.3, 141.7, 136.5, 135.8, 132.9, 132.2, 131.0, 130.9, 128.1, 125.4, 123.2, 121.5, 120.9, 60.6, 37.3, 28.7, 14.4; HRMS (*m/z*, ESI-TOF): Calcd for C<sub>21</sub>H<sub>20</sub>ClN<sub>2</sub>O<sub>3</sub><sup>+</sup> [*M*+*H*<sup>+</sup>] 383.1157, found 383.1153.

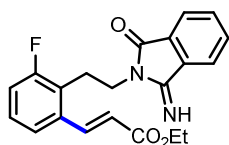

2c

**(E)-ethyl-3-(3-fluoro-2-(2-(1-imino-3-oxoisindolin-2-yl)ethyl)phenyl)acrylate:**

The corresponding reaction was run with standard conditions at 80 °C for 48 h in 0.1 mmol scale. <sup>1</sup>H NMR (400 MHz, CDCl<sub>3</sub>) δ 7.92 (d, *J* = 15.7 Hz, 1H), 7.68 (d, *J* = 7.0 Hz, 1H), 7.61 (d, *J* = 7.1 Hz, 1H), 7.59-7.48 (m, 2H), 7.19 (d, *J* = 7.7 Hz, 1H), 7.17-7.07 (m, 1H), 6.98 (t, *J* = 8.8 Hz, 1H), 6.04 (d, *J* = 15.7 Hz, 1H), 4.12 (q, *J* = 7.1 Hz, 2H), 3.97 (t, *J* = 6.7 Hz, 2H), 3.17 (t, *J* = 6.5 Hz, 2H), 1.25 (t, *J* = 7.1 Hz, 3H); <sup>13</sup>C NMR (101 MHz, CDCl<sub>3</sub>) δ 167.6, 166.4, 161.8 (d, *J*<sub>C-F</sub> = 246.4 Hz), 160.2, 140.8 (d, *J*<sub>C-F</sub> = 3.0 Hz), 136.3 (d, *J*<sub>C-F</sub> = 5.1 Hz), 132.9, 132.2, 132.1, 131.0, 128.3 (d, *J*<sub>C-F</sub> = 9.1 Hz), 125.7 (d, *J*<sub>C-F</sub> = 17.2 Hz), 123.2, 122.3 (d, *J*<sub>C-F</sub> = 3.0 Hz), 121.1, 120.9, 116.5 (d, *J*<sub>C-F</sub> = 21.2 Hz), 60.6, 38.1, 24.0 (d, *J*<sub>C-F</sub> = 4.0 Hz), 14.4; HRMS (ESI-TOF): Calcd for C<sub>21</sub>H<sub>20</sub>FN<sub>2</sub>O<sub>3</sub><sup>+</sup> [*M*+*H*<sup>+</sup>] 367.1452, found 367.1450.

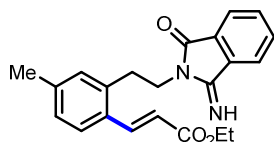

2d<sub>mono</sub>

**(E)-ethyl-3-(2-(2-(1-imino-3-oxoisindolin-2-yl)ethyl)-4-methylphenyl)acrylate:**

The corresponding reaction was run with standard conditions at 70 °C for 48 h in 0.1 mmol scale. <sup>1</sup>H NMR (400 MHz, CDCl<sub>3</sub>) δ 8.14 (d, *J* = 15.7 Hz, 1H), 7.81 (d, *J* = 6.8 Hz, 1H), 7.71 (d, *J* = 6.8 Hz, 1H), 7.69-7.59 (m, 2H), 7.46 (d, *J* = 8.0 Hz, 1H), 7.11 (s, 1H), 7.06 (d, *J* = 8.0 Hz, 1H), 6.25 (d, *J* = 15.7 Hz, 1H), 4.23 (q, *J* = 7.1 Hz, 2H), 4.01 (t, *J* = 7.6 Hz, 2H), 3.15 (t, *J* = 7.6 Hz, 2H), 2.31 (s, 3H), 1.34 (t, *J* = 7.1 Hz, 3H); <sup>13</sup>C NMR (101 MHz, CDCl<sub>3</sub>) δ 167.7, 167.1, 141.8, 140.6, 138.3, 132.9, 132.3, 131.5, 131.2, 131.0, 128.3, 126.7, 123.3, 121.0, 119.0, 60.5, 39.6, 31.9, 21.4, 14.5; HRMS (ESI-TOF): Calcd for C<sub>22</sub>H<sub>23</sub>N<sub>2</sub>O<sub>3</sub><sup>+</sup> [*M*+*H*<sup>+</sup>] 363.1703, found 363.1701.

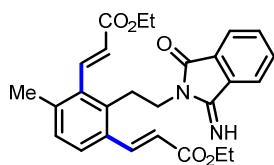

2d<sub>(o,o)di</sub>

**(2*E*,2'*E*)-diethyl-3,3'-(2-(2-(1-imino-3-oxoisindolin-2-yl)ethyl)-4-methyl-1,3-phenylene)diacrylate:** <sup>1</sup>H NMR (400 MHz, CDCl<sub>3</sub>) δ 8.64 (s, 1H), 8.16 (d, *J* = 15.6



Hz, 1H), 7.91 (d,  $J = 16.3$  Hz, 1H), 7.77 (d,  $J = 6.9$  Hz, 1H), 7.72-7.56 (m, 3H), 7.41 (d,  $J = 8.0$  Hz, 1H), 7.14 (d,  $J = 8.0$  Hz, 1H), 6.17 (d,  $J = 15.6$  Hz, 1H), 6.08 (d,  $J = 16.3$  Hz, 1H), 4.31 (q,  $J = 7.1$  Hz, 2H), 4.23 (q,  $J = 7.1$  Hz, 2H), 3.94 (brs, 2H), 3.20 (t,  $J = 7.1$  Hz, 2H), 2.33 (d,  $J = 9.2$  Hz, 3H), 1.40-1.32 (m, 6H);  $^{13}\text{C}$  NMR (101 MHz,  $\text{CDCl}_3$ )  $\delta$  167.5, 166.8, 166.3, 143.1, 142.1, 138.4, 136.3, 132.9, 132.4, 132.2, 131.1, 129.6, 126.6, 126.2, 123.3, 120.9, 120.0, 60.8, 60.6, 38.3, 28.6, 21.5, 14.5; HRMS (ESI-TOF): Calcd for  $\text{C}_{27}\text{H}_{29}\text{N}_2\text{O}_5^+$   $[\text{M}+\text{H}^+]$  461.2071, found 461.2064.

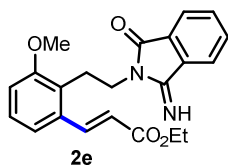

**(E)-ethyl-3-(2-(2-(1-imino-3-oxoisindolin-2-yl)ethyl)-3-methoxyphenyl)**

**acrylate:** The corresponding reaction was run with standard conditions for 24 h.  $^1\text{H}$  NMR (400 MHz,  $\text{CDCl}_3$ )  $\delta$  8.03 (d,  $J = 15.7$  Hz, 1H), 7.74 (d,  $J = 6.7$  Hz, 1H), 7.70 (d,  $J = 7.0$  Hz, 1H), 7.64-7.54 (m, 2H), 7.18 (t,  $J = 8.0$  Hz, 1H), 7.07 (d,  $J = 7.8$  Hz, 1H), 6.86 (d,  $J = 8.1$  Hz, 1H), 6.08 (d,  $J = 15.7$  Hz, 1H), 4.18 (q,  $J = 7.1$  Hz, 2H), 3.98 (t,  $J = 6.8$  Hz, 2H), 3.81 (s, 3H), 3.21 (t,  $J = 6.8$  Hz, 2H), 1.31 (t,  $J = 7.2$  Hz, 3H);  $^{13}\text{C}$  NMR (101 MHz,  $\text{CDCl}_3$ )  $\delta$  167.6, 166.6, 159.9, 158.1, 142.1, 135.3, 132.8, 132.1, 131.1, 127.9, 127.1, 123.1, 121.0, 120.5, 118.8, 111.5, 60.4, 55.7, 37.8, 24.7, 14.4; HRMS (ESI-TOF): Calcd for  $\text{C}_{22}\text{H}_{23}\text{N}_2\text{O}_4^+$   $[\text{M}+\text{H}^+]$  379.1652, found 379.1663.

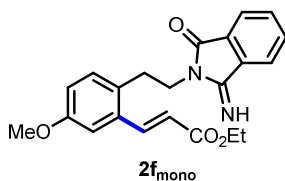

**(E)-ethyl-3-(2-(2-(1-imino-3-oxoisindolin-2-yl)ethyl)-5-**

**methoxyphenyl)acrylate:** The corresponding reaction was run with standard conditions for 24 h.  $^1\text{H}$  NMR (400 MHz,  $\text{CDCl}_3$ )  $\delta$  8.11 (d,  $J = 15.7$  Hz, 1H), 7.81 (d,  $J = 6.6$  Hz, 1H), 7.76 (d,  $J = 7.0$  Hz, 1H), 7.72-7.59 (m, 2H), 7.20 (d,  $J = 8.4$  Hz, 1H), 7.05 (d,  $J = 2.5$  Hz, 1H), 6.87 (dd,  $J = 8.4, 2.5$  Hz, 1H), 6.25 (d,  $J = 15.7$  Hz, 1H), 4.24 (q,  $J = 7.1$  Hz, 2H), 4.00 (t,  $J = 7.3$  Hz, 2H), 3.80 (s, 3H), 3.13 (t,  $J = 7.3$  Hz, 2H), 1.35 (t,  $J = 7.1$  Hz, 3H);  $^{13}\text{C}$  NMR (101 MHz,  $\text{CDCl}_3$ )  $\delta$  167.7, 166.9, 158.7, 141.9, 134.8, 133.1, 132.5, 132.1, 131.9, 131.0, 130.6, 123.4, 121.2, 120.1, 116.6, 111.3, 60.6, 55.4, 39.8, 31.1, 14.5; HRMS (ESI-TOF): Calcd for  $\text{C}_{22}\text{H}_{23}\text{N}_2\text{O}_4^+$   $[\text{M}+\text{H}^+]$  379.1652, found 379.1659.

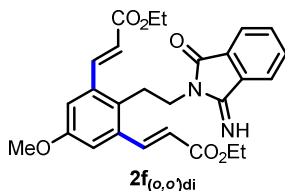

**(2E,2'E)-diethyl-3,3'-(2-(2-(1-imino-3-oxoisindolin-2-yl)ethyl)-5-**

**methoxy-1,3-phenylene)diacrylate:**  $^1\text{H}$  NMR (400 MHz,  $\text{CDCl}_3$ )  $\delta$  8.13 (d,  $J = 15.6$  Hz, 2H), 7.75 (dd,  $J = 6.3, 1.4$  Hz, 1H), 7.69-7.52 (m, 3H), 7.06 (s, 2H), 6.21 (d,  $J = 15.6$  Hz, 2H), 4.24 (q,  $J = 7.1$  Hz, 4H), 3.95 (t,  $J = 7.0$  Hz, 2H), 3.81 (s, 3H), 3.25 (t,  $J = 7.0$  Hz, 2H), 1.34 (t,  $J = 7.1$  Hz, 6H);  $^{13}\text{C}$  NMR (101 MHz,  $\text{CDCl}_3$ )  $\delta$  167.5, 166.6, 158.4, 142.0, 136.5, 133.9, 132.9, 132.2, 131.1, 129.9, 123.3, 121.9, 121.6, 120.9, 114.0, 60.7, 55.5, 38.8, 27.0, 14.5; HRMS (ESI-TOF): Calcd for  $\text{C}_{27}\text{H}_{29}\text{N}_2\text{O}_6^+$   $[\text{M}+\text{H}^+]$  477.2020, found 477.2029.

## 2.4 General remote-selective *meta*-C–H bond olefination procedure and characterization of olefinated compounds.

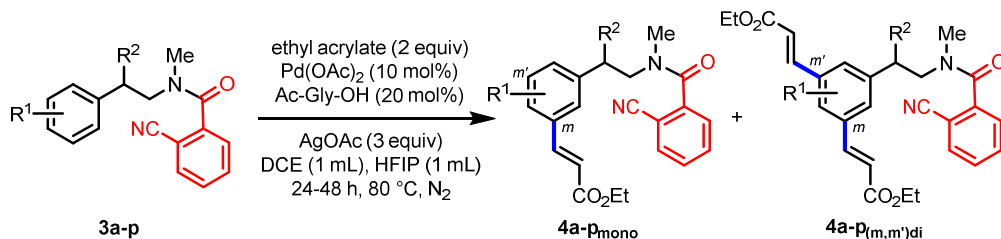

A 50 mL Schlenk sealed tube (with a Teflon cap) equipped with a magnetic stir bar was charged with amide **3** (0.20 mmol, 1.0 equiv), Pd(OAc)<sub>2</sub> (4.6 mg, 0.020 mmol, 10 mol%), Ac-Gly-OH (4.7 mg, 0.040 mmol, 20 mol%) and AgOAc (100 mg, 0.60 mmol, 3 equiv). The tube was then purged with nitrogen. DCE (1.0 mL) was added to the mixture, followed by ethyl acrylate (2.0 equiv) [and DMF (77  $\mu$ L, 1.0 mmol, 5 equiv) when necessary as noted below]. And then 1.0 mL of HFIP was added along the inside wall of the tube. The tube was then capped under a flow of nitrogen and submerged into a preheated 80  $^\circ$ C oil bath. The reaction was stirred for 24–48 h and cooled to room temperature. The crude reaction mixture was diluted with EtOAc (5 mL) and filtered through a short pad of Celite. The sealed tube and Celite pad were washed with an additional 20 mL of EtOAc. The filtrate was concentrated *in vacuo*, and the resulting residue was purified by preparative thin layer chromatography using petroleum ether/EtOAc as the eluent. The site selectivity was assigned by <sup>1</sup>H NMR analysis of the product or the hydrolyzed product with EtOH/HCl (see Section 2.6).

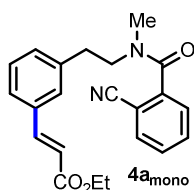

**(*E*)-ethyl-3-(3-(2-(2-cyano-*N*-methylbenzamido)ethyl)phenyl)acrylate:** The corresponding reaction was run with standard conditions for 32 h. The two rotamers' ratio is about 55:45. <sup>1</sup>H NMR (400 MHz, CDCl<sub>3</sub>)  $\delta$  7.73-7.66 (m, 0.85H), 7.68-7.58 (m, 1.37H), 7.56 (d,  $J$  = 16.1 Hz, 0.50H), 7.53-7.40 (m, 2.16H), 7.42-7.31 (m, 2.75H), 7.27 (t,  $J$  = 7.6 Hz, 0.74H), 7.02 (s, 0.44H), 6.98 (d,  $J$  = 7.6 Hz, 0.43H), 6.80 (dd,  $J$  = 6.0, 2.9 Hz, 0.46H), 6.45 (d,  $J$  = 16.0 Hz, 0.55H), 6.33 (d,  $J$  = 16.0 Hz, 0.44H), 4.26 (q,  $J$  = 7.1 Hz, 2.14H), 3.81 (t,  $J$  = 7.6 Hz, 1.12H), 3.45 (t,  $J$  = 6.9 Hz, 0.92H), 3.20 (s, 1.47H), 3.05 (t,  $J$  = 7.6 Hz, 1.13H), 2.83 (s, 2.67H), 1.37-1.30 (m, 3.28H); <sup>13</sup>C NMR (101 MHz, CDCl<sub>3</sub>)  $\delta$  168.0, 167.6, 167.1, 166.9, 144.5, 144.0, 140.6, 140.3, 139.6, 138.5, 135.1, 134.9, 133.2, 133.0, 132.9, 132.7, 131.0, 130.8, 129.6, 129.5, 129.4, 129.3, 128.6, 128.4, 127.6, 127.4, 126.6, 126.4, 118.9, 118.6, 116.9, 116.8, 110.0, 109.8, 60.7, 60.6, 52.4, 49.4, 37.4, 34.4, 33.2, 33.0, 14.4; HRMS ( $m/z$ , ESI-TOF): Calcd for C<sub>22</sub>H<sub>23</sub>N<sub>2</sub>O<sub>3</sub><sup>+</sup> [M+H<sup>+</sup>] 363.1703, found 363.1703.

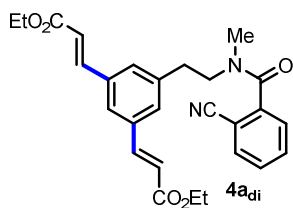

**(*2E,2'E*)-diethyl-3,3'-(5-(2-(2-cyano-*N*-methylbenzamido)ethyl)-1,3-phenylene)diacrylate:** The two rotamers' ratio is about 3:2. <sup>1</sup>H NMR (400 MHz, CDCl<sub>3</sub>)  $\delta$  7.74-7.59 (m, 3.17H), 7.57 (d,  $J$  = 16.0 Hz, 0.81H), 7.55-7.44 (m, 3.66H), 7.37 (d,  $J$  = 7.7 Hz, 0.61H),

7.06 (s, 0.72H), 6.92-6.84 (m, 0.38H), 6.49 (d,  $J = 16.0$  Hz, 1.17H), 6.37 (d,  $J = 16.0$  Hz, 0.78H), 4.27 (q,  $J = 7.1$  Hz, 4.27H), 3.82 (t,  $J = 7.6$  Hz, 1.19H), 3.49 (t,  $J = 6.9$  Hz, 0.79H), 3.20 (s, 1.30H), 3.08 (t,  $J = 7.6$  Hz, 1.24H), 2.91-2.79 (m, 2.69H), 1.39-1.30 (m, 6.41H);  $^{13}\text{C}$  NMR (101 MHz,  $\text{CDCl}_3$ )  $\delta$  167.9, 167.7, 166.8, 166.6, 143.6, 143.1, 140.5, 140.3, 140.2, 139.2, 135.8, 135.6, 133.2, 133.0, 132.8, 130.1, 129.7, 129.6, 129.5, 127.6, 127.4, 126.1, 119.9, 119.6, 116.8, 116.8, 110.0, 109.9, 60.8, 60.7, 52.2, 49.3, 37.4, 34.3, 33.1, 33.0, 14.4; HRMS ( $m/z$ , ESI-TOF): Calcd for  $\text{C}_{27}\text{H}_{29}\text{N}_2\text{O}_5^+$  [ $\text{M}+\text{H}^+$ ] 461.2071, found 461.2062.

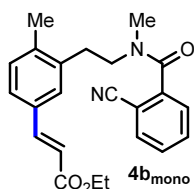

**(*E*)-ethyl-3-(3-(2-(2-cyano-*N*-methylbenzamido)ethyl)-4-methylphenyl)**

**acrylate:** The corresponding reaction was run with standard conditions and DMF (5 equiv) at 90 °C for 36 h. The two rotamers' ratio is about 54:46.  $^1\text{H}$  NMR (400 MHz,  $\text{CDCl}_3$ )  $\delta$  7.75-7.60 (m, 2.09H), 7.59-7.37 (m, 3.01H), 7.31 (t,  $J = 9.9$  Hz, 1.00H), 7.19 (d,  $J = 7.6$  Hz, 0.60H), 7.07 (d,  $J = 8.0$  Hz, 0.44H), 7.00 (s, 0.44H), 6.96 (d,  $J = 7.3$  Hz, 0.41H), 6.42 (d,  $J = 16.0$  Hz, 0.54H), 6.31 (d,  $J = 16.0$  Hz, 0.46H), 4.26 (q,  $J = 6.9$  Hz, 2.00H), 3.74 (t,  $J = 7.9$  Hz, 1.09H), 3.40 (t,  $J = 7.2$  Hz, 0.92H), 3.25 (s, 1.29H), 3.06 (t,  $J = 8.0$  Hz, 1.09H), 2.91 (s, 1.69H), 2.83 (t,  $J = 6.9$  Hz, 0.93H), 2.46 (s, 1.68H), 2.00 (s, 1.29H), 1.34 (t,  $J = 7.0$  Hz, 3.00H);  $^{13}\text{C}$  NMR (101 MHz,  $\text{CDCl}_3$ )  $\delta$  167.9, 167.6, 167.2, 167.0, 144.5, 144.0, 140.6, 140.3, 139.4, 138.8, 137.5, 136.4, 133.2, 133.0, 133.0, 132.8, 132.7, 132.5, 131.3, 131.1, 129.6, 129.4, 129.4, 129.3, 127.6, 127.4, 126.6, 126.5, 117.9, 117.5, 116.8, 116.8, 110.0, 109.9, 60.6, 60.5, 51.3, 48.3, 37.2, 33.2, 32.0, 30.8, 19.4, 18.9, 14.4; HRMS ( $m/z$ , ESI-TOF): Calcd for  $\text{C}_{23}\text{H}_{25}\text{N}_2\text{O}_3^+$  [ $\text{M}+\text{H}^+$ ] 377.1860, found 377.1857.

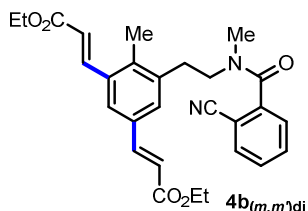

**(*2E,2'E*)-diethyl-3,3'-(5-(2-(2-cyano-*N*-methylbenzamido)ethyl)-4-**

**methyl-1,3-phenylene)diacrylate:** The two rotamers' ratio is about 3:2.  $^1\text{H}$  NMR (400 MHz,  $\text{CDCl}_3$ )  $\delta$  8.03 (d,  $J = 15.8$  Hz, 0.62H), 7.85 (d,  $J = 15.8$  Hz, 0.45H), 7.72 (d,  $J = 7.8$  Hz, 0.66H), 7.71-7.61 (m, 1.63H), 7.61-7.38 (m, 4.02H), 7.09 (s, 0.38H), 7.00-6.89 (m, 0.38H), 6.47 (d,  $J = 16.0$  Hz, 0.60H), 6.42-6.27 (m, 1.40H), 4.36-4.21 (m, 4.04H), 3.73 (dd,  $J = 9.0, 6.9$  Hz, 1.17H), 3.42 (t,  $J = 7.2$  Hz, 0.84H), 3.26 (s, 1.24H), 3.13 (dd,  $J = 6.5, 3.7$  Hz, 1.20H), 2.94 (s, 1.80H), 2.89 (t,  $J = 7.3$  Hz, 0.80H), 2.52 (s, 1.73H), 1.95 (s, 1.12H), 1.44-1.30 (m, 6.07H);  $^{13}\text{C}$  NMR (101 MHz,  $\text{CDCl}_3$ )  $\delta$  167.9, 167.7, 167.0, 166.8, 166.8, 166.7, 143.8, 143.3, 142.6, 142.1, 140.5, 140.2, 138.5, 138.5, 137.7, 137.4, 135.6, 135.5, 133.3, 133.0, 133.0, 132.8, 132.8, 132.6, 130.7, 130.7, 129.7, 129.6, 127.7, 127.5, 125.3, 125.2, 121.5, 121.2, 119.0, 118.6, 116.9, 116.8, 110.1, 110.0, 60.9, 60.8, 60.7, 51.2, 48.6, 37.4, 33.3, 32.8, 31.5, 15.6, 15.0, 14.4; HRMS ( $m/z$ , ESI-TOF): Calcd for  $\text{C}_{28}\text{H}_{31}\text{N}_2\text{O}_5^+$  [ $\text{M}+\text{H}^+$ ] 475.2227, found 475.2220.

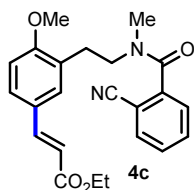

**(E)-ethyl-3-(3-(2-(2-cyano-N-methylbenzamido)ethyl)-4-methoxyphenyl)**

**acrylate:** The corresponding reaction was run with standard conditions and DMF (5 equiv) for 24 h. The two rotamers' ratio is about 2:3.  $^1\text{H}$  NMR (400 MHz,  $\text{CDCl}_3$ )  $\delta$  7.68 (d,  $J = 7.7$  Hz, 0.46H), 7.66-7.57 (m, 1.54H), 7.54 (d,  $J = 15.9$  Hz, 0.66H), 7.50-7.42 (m, 2.03H), 7.42-7.34 (m, 1.09H), 7.31 (d,  $J = 7.7$  Hz, 0.42H), 7.08 (s, 0.56H), 6.91-6.83 (m, 1.00H), 6.73 (d,  $J = 8.5$  Hz, 0.58H), 6.33 (d,  $J = 16.0$  Hz, 0.40H), 6.22 (d,  $J = 16.0$  Hz, 0.58H), 4.24 (q,  $J = 7.1$  Hz, 2.16H), 3.89 (s, 1.25H), 3.79 (t,  $J = 7.3$  Hz, 0.88H), 3.60 (s, 1.82H), 3.42 (t,  $J = 6.9$  Hz, 1.25H), 3.20 (s, 1.93H), 3.03 (t,  $J = 7.3$  Hz, 0.84H), 2.84-2.78 (m, 2.52H), 1.32 (t,  $J = 7.1$  Hz, 3.16H);  $^{13}\text{C}$  NMR (101 MHz,  $\text{CDCl}_3$ )  $\delta$  167.9, 167.6, 167.4, 167.2, 159.7, 159.4, 144.3, 143.9, 140.9, 140.6, 133.1, 133.0, 132.8, 132.6, 130.3, 130.2, 129.4, 129.1, 128.8, 127.9, 127.8, 127.4, 127.3, 127.1, 126.6, 116.9, 116.3, 116.0, 110.7, 110.6, 110.0, 60.5, 60.4, 55.7, 55.3, 50.8, 47.5, 37.3, 33.0, 29.5, 28.4, 14.4; HRMS ( $m/z$ , ESI-TOF): Calcd for  $\text{C}_{23}\text{H}_{25}\text{N}_2\text{O}_4$   $[\text{M}+\text{H}^+]$  393.1809, found 393.1805.

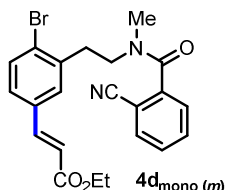

**(E)-ethyl-3-(4-bromo-3-(2-(2-cyano-N-methylbenzamido)ethyl)phenyl)**

**acrylate:** The corresponding reaction was run with standard conditions and ethyl acrylate (2.5 equiv) at 90 °C for 36 h using HFIP as the sole solvent. The two rotamers' ratio is about 54:46.  $^1\text{H}$  NMR (400 MHz,  $\text{CDCl}_3$ )  $\delta$  7.72 (d,  $J = 7.7$  Hz, 0.54H), 7.70-7.63 (m, 1.29H), 7.60 (d,  $J = 7.2$  Hz, 0.55H), 7.58-7.48 (m, 2.86H), 7.45 (d,  $J = 8.3$  Hz, 0.57H), 7.42 (d,  $J = 7.7$  Hz, 0.54H), 7.28 (d,  $J = 2.6$  Hz, 0.48H), 7.25 (dd,  $J = 6.0, 2.2$  Hz, 0.56H), 7.14 (d,  $J = 1.9$  Hz, 0.52H), 7.01 (dd,  $J = 7.4, 1.5$  Hz, 0.47H), 6.48 (d,  $J = 16.0$  Hz, 0.52H), 6.37 (d,  $J = 16.0$  Hz, 0.45H), 4.31-4.23 (m, 2.00H), 3.82 (dd,  $J = 8.4, 6.9$  Hz, 1.08H), 3.50 (t,  $J = 7.2$  Hz, 0.97H), 3.26 (s, 1.44H), 3.21 (dd,  $J = 8.7, 6.6$  Hz, 1.08H), 2.97 (t,  $J = 7.3$  Hz, 0.99H), 2.89 (s, 1.66H), 1.38-1.31 (m, 3.07H);  $^{13}\text{C}$  NMR (101 MHz,  $\text{CDCl}_3$ )  $\delta$  168.0, 167.8, 166.8, 166.6, 143.1, 142.7, 140.6, 140.3, 138.9, 137.7, 134.5, 134.4, 133.8, 133.6, 133.2, 133.1, 133.1, 132.9, 130.9, 130.6, 129.6, 129.5, 127.8, 127.7, 127.7, 127.5, 126.4, 126.4, 119.7, 119.5, 116.9, 116.9, 110.1, 110.1, 60.8, 60.7, 50.6, 47.8, 37.4, 35.1, 33.7, 33.3, 14.4; HRMS ( $m/z$ , ESI-TOF): Calcd for  $\text{C}_{22}\text{H}_{22}\text{BrN}_2\text{O}_3$   $[\text{M}+\text{H}^+]$  441.0808, found 441.0818.

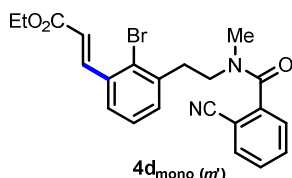

**(E)-ethyl-3-(2-bromo-3-(2-(2-cyano-N-methylbenzamido)ethyl)**

**phenyl)acrylate:** The two rotamers' ratio is about 1:1.  $^1\text{H}$  NMR (400 MHz,  $\text{CDCl}_3$ )  $\delta$  8.14 (d,  $J = 15.9$  Hz, 0.43H), 7.93 (d,  $J = 15.9$  Hz, 0.47H), 7.72 (d,  $J = 7.8$  Hz, 0.53H), 7.70-7.61 (m, 1.05H), 7.55-7.40 (m, 3.63H), 7.34-7.23 (m, 1.13H), 7.10 (dd,  $J = 7.5, 1.4$  Hz, 0.49H), 6.84-6.79 (m, 0.45H), 6.41-6.30 (m, 0.90H), 4.28 (q,  $J = 7.1$  Hz, 2.07H), 3.82 (dd,  $J = 8.5, 6.7$  Hz, 0.99H), 3.54 (t,  $J = 7.0$  Hz, 1.00H), 3.31-3.18 (m, 2.67H), 3.00 (t,  $J = 7.0$  Hz, 1.11H), 2.88 (s, 1.47H), 1.35 (t,  $J = 7.0$  Hz, 3.01H);  $^{13}\text{C}$  NMR (101 MHz,  $\text{CDCl}_3$ )  $\delta$  168.0, 167.6, 166.4, 166.3, 143.8, 143.4, 140.5, 140.0, 139.5, 138.2, 135.9, 135.6, 133.1, 133.0, 132.8, 132.7, 132.4, 129.5, 129.4,

127.9, 127.8, 127.5, 127.4, 127.2, 127.1, 126.8, 126.5, 121.7, 121.4, 116.8, 116.8, 109.9, 109.9, 60.8, 60.7, 50.1, 47.7, 37.4, 35.5, 34.3, 33.1, 14.3; HRMS (m/z, ESI-TOF): Calcd for  $C_{22}H_{22}BrN_2O_3^+$  [M+H<sup>+</sup>] 441.0808, found 441.0819.

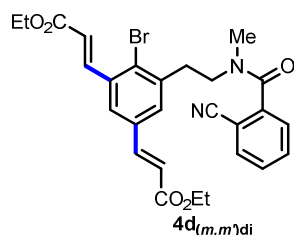

**(2E,2'E)-diethyl-3,3'-(4-bromo-5-(2-(2-cyano-N-methylbenzamido)ethyl)-1,3-phenylene)diacrylate:** The two rotamers' ratio is about 53:47. <sup>1</sup>H NMR (400 MHz, CDCl<sub>3</sub>) δ 8.10 (d, *J* = 15.9 Hz, 0.53H), 7.91 (d, *J* = 15.9 Hz, 0.47H), 7.73 (d, *J* = 7.7 Hz, 0.60H), 7.71-7.63 (m, 1.43H), 7.63-7.55 (m, 1.80H), 7.57-7.46 (m, 1.81H), 7.43 (d, *J* = 7.6 Hz, 0.60H), 7.20 (d, *J* = 1.6 Hz, 0.41H), 7.01-6.96 (m, 0.39H), 6.53 (d, *J* = 16.0 Hz, 0.52H), 6.48-6.33 (m, 1.37H), 4.34-4.23 (m, 4.10H), 3.90-3.80 (m, 1.07H), 3.54 (t, *J* = 7.1 Hz, 0.92H), 3.33-3.21 (m, 2.56H), 3.03 (t, *J* = 7.1 Hz, 0.94H), 2.92 (s, 1.52H), 1.40-1.31 (m, 6.18H); <sup>13</sup>C NMR (101 MHz, CDCl<sub>3</sub>) δ 167.9, 167.8, 166.5, 166.3, 166.2, 166.1, 143.3, 142.8, 142.4, 142.0, 140.5, 140.3, 140.1, 139.0, 136.7, 136.4, 134.3, 134.2, 133.2, 133.0, 133.0, 132.9, 131.3, 131.0, 129.6, 129.6, 128.6, 128.4, 127.6, 127.4, 125.9, 125.9, 122.6, 122.3, 120.5, 120.3, 116.9, 116.8, 110.1, 110.0, 61.0, 60.9, 60.8, 50.2, 47.6, 37.4, 35.7, 34.3, 33.3, 14.4; HRMS (m/z, ESI-TOF): Calcd for  $C_{27}H_{28}BrN_2O_5^+$  [M+H<sup>+</sup>] 539.1176, found 539.1185.

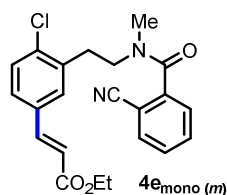

**(E)-ethyl-3-(4-chloro-3-(2-(2-cyano-N-methylbenzamido)ethyl)phenyl)acrylate:** The corresponding reaction was run with standard conditions and ethyl acrylate (2.5 equiv) at 90 °C for 48 h using HFIP as the sole solvent. The two rotamers' ratio is about 53:47. <sup>1</sup>H NMR (400 MHz, CDCl<sub>3</sub>) δ 7.72 (d, *J* = 7.7 Hz, 0.53H), 7.72-7.59 (m, 1.54H), 7.59-7.45 (m, 2.53H), 7.44-7.31 (m, 2.13H), 7.30-7.24 (m, 0.95H), 7.15 (d, *J* = 2.1 Hz, 0.50H), 7.01 (d, *J* = 7.6 Hz, 0.50H), 6.46 (d, *J* = 16.0 Hz, 0.53H), 6.35 (d, *J* = 16.0 Hz, 0.47H), 4.27 (q, *J* = 7.1 Hz, 2.00H), 3.83 (dd, *J* = 8.6, 6.5 Hz, 1.06H), 3.49 (t, *J* = 7.2 Hz, 0.94H), 3.25 (s, 1.38H), 3.20 (dd, *J* = 8.5, 6.6 Hz, 1.07H), 2.96 (t, *J* = 7.2 Hz, 0.94H), 2.88 (s, 1.61H), 1.34 (t, *J* = 7.1 Hz, 3.05H); <sup>13</sup>C NMR (101 MHz, CDCl<sub>3</sub>) δ 168.0, 167.7, 166.9, 166.7, 143.1, 142.7, 140.6, 140.3, 137.2, 136.0, 136.0, 133.9, 133.8, 133.2, 133.1, 132.9, 131.0, 130.7, 130.4, 130.3, 129.6, 129.5, 127.7, 127.7, 127.5, 119.6, 119.4, 116.9, 116.9, 110.1, 60.8, 60.7, 50.5, 47.7, 37.4, 33.3, 32.7, 31.3, 14.4; HRMS (m/z, ESI-TOF): Calcd for  $C_{22}H_{22}ClN_2O_3^+$  [M+H<sup>+</sup>] 397.1313, found 397.1324.

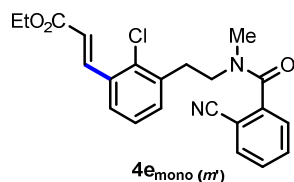

**(E)-ethyl-3-(2-chloro-3-(2-(2-cyano-N-methylbenzamido)ethyl)phenyl)acrylate:** The two rotamers' ratio is about 1:1. <sup>1</sup>H NMR (400 MHz, CDCl<sub>3</sub>) δ 8.17 (d, *J* = 16.0 Hz, 0.43H), 7.96 (d, *J* = 16.0 Hz, 0.47H), 7.72 (d, *J* = 7.7 Hz, 0.55H), 7.71-7.62 (m, 1.09H), 7.57-7.50 (m, 1.53H), 7.50-7.39 (m, 2.19H), 7.28 (t, *J* = 3.8 Hz, 0.57H), 7.23 (t, *J* = 7.7

Hz, 0.51H), 7.12 (d,  $J = 7.4$  Hz, 0.50H), 6.88-6.81 (m, 0.48H), 6.45-6.35 (m, 1.00H), 4.29 (q,  $J = 7.1$  Hz, 2.11H), 3.84 (dd,  $J = 8.6, 6.5$  Hz, 1.05H), 3.53 (t,  $J = 7.0$  Hz, 1.09H), 3.31-3.19 (m, 2.63H), 2.99 (t,  $J = 7.0$  Hz, 1.06H), 2.87 (s, 1.50H), 1.36 (t,  $J = 7.1$  Hz, 3.18H);  $^{13}\text{C}$  NMR (101 MHz,  $\text{CDCl}_3$ )  $\delta$  168.1, 167.7, 166.6, 166.4, 141.1, 140.6, 140.1, 137.8, 136.4, 134.8, 134.7, 133.9, 133.7, 133.2, 133.1, 132.9, 132.9, 132.8, 132.6, 129.6, 129.5, 127.6, 127.4, 127.3, 127.2, 126.7, 126.4, 121.6, 121.3, 116.9, 116.8, 110.1, 110.0, 60.9, 60.8, 50.1, 47.7, 37.4, 33.2, 33.2, 31.7, 14.4; HRMS ( $m/z$ , ESI-TOF): Calcd for  $\text{C}_{22}\text{H}_{22}\text{ClN}_2\text{O}_3^+$   $[\text{M}+\text{H}^+]$  397.1313, found 397.1324.

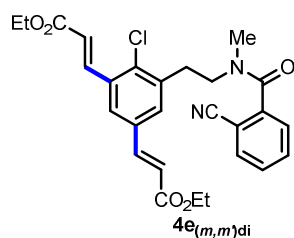

**(2E,2'E)-diethyl-3,3'-(4-chloro-5-(2-(2-cyano-N-methylbenzamido)ethyl)-1,3-phenylene)diacrylate:** The two rotamers' ratio is about 55:45.  $^1\text{H}$  NMR (400 MHz,  $\text{CDCl}_3$ )  $\delta$  8.09 (d,  $J = 16.0$  Hz, 0.52H), 7.89 (d,  $J = 16.0$  Hz, 0.43H), 7.69 (d,  $J = 7.7$  Hz, 0.58H), 7.67-7.56 (m, 3.05H), 7.53 (d,  $J = 16.3$  Hz, 0.64H), 7.51-7.43 (m, 1.28H), 7.39 (d,  $J = 7.7$  Hz, 0.56H), 7.19 (d,  $J = 1.8$  Hz, 0.47H), 7.02-6.93 (m, 0.45H), 6.48 (d,  $J = 16.1$  Hz, 0.51H), 6.46-6.34 (m, 1.42H), 4.31-4.19 (m, 4.00H), 3.85-3.77 (m, 1.09H), 3.49 (t,  $J = 7.2$  Hz, 0.91H), 3.26-3.17 (m, 2.47H), 2.98 (t,  $J = 7.2$  Hz, 0.91H), 2.87 (s, 1.55H), 1.36-1.27 (m, 6.01H);  $^{13}\text{C}$  NMR (101 MHz,  $\text{CDCl}_3$ )  $\delta$  167.9, 167.7, 166.5, 166.3, 166.3, 166.1, 142.4, 142.0, 140.5, 140.4, 140.1, 140.0, 138.4, 137.1, 136.1, 136.0, 134.5, 134.3, 133.7, 133.6, 133.2, 133.0, 132.9, 132.8, 131.5, 131.2, 129.6, 129.6, 127.5, 127.4, 125.9, 125.8, 122.5, 122.2, 120.4, 120.2, 116.8, 116.8, 110.1, 110.0, 61.0, 60.9, 60.8, 60.7, 50.1, 47.5, 37.4, 33.2, 33.2, 31.7, 14.3; HRMS ( $m/z$ , ESI-TOF): Calcd for  $\text{C}_{27}\text{H}_{28}\text{ClN}_2\text{O}_5^+$   $[\text{M}+\text{H}^+]$  495.1681, found 495.1689.

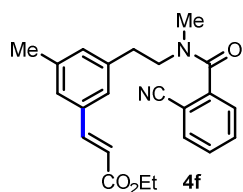

**(E)-ethyl-3-(3-(2-(2-cyano-N-methylbenzamido)ethyl)-5-methylphenyl)acrylate:** The corresponding reaction was run with standard conditions and DMF (5 equiv) for 32 h. The two rotamers' ratio is about 53:47.  $^1\text{H}$  NMR (400 MHz,  $\text{CDCl}_3$ )  $\delta$  7.69 (d,  $J = 7.7$  Hz, 0.61H), 7.68-7.58 (m, 1.54H), 7.53 (d,  $J = 16.4$  Hz, 0.66H), 7.51-7.41 (m, 1.34H), 7.37 (d,  $J = 7.7$  Hz, 0.57H), 7.27 (s, 0.57H), 7.20 (s, 1.01H), 7.16 (s, 0.49H), 6.86-6.69 (m, 1.39H), 6.43 (d,  $J = 16.0$  Hz, 0.50H), 6.31 (d,  $J = 16.0$  Hz, 0.44H), 4.25 (q,  $J = 7.1$  Hz, 2.02H), 3.78 (dd,  $J = 8.8, 6.5$  Hz, 1.05H), 3.44 (t,  $J = 6.9$  Hz, 0.95H), 3.19 (s, 1.43H), 3.00 (t,  $J = 7.7$  Hz, 1.05H), 2.83 (s, 1.58H), 2.78 (t,  $J = 6.8$  Hz, 0.95H), 2.35 (s, 1.57H), 2.28 (s, 1.44H), 1.36-1.28 (m, 3.03H);  $^{13}\text{C}$  NMR (101 MHz,  $\text{CDCl}_3$ )  $\delta$  167.9, 167.6, 167.1, 166.9, 144.6, 144.2, 140.7, 140.3, 139.4, 139.2, 138.9, 138.3, 135.0, 134.8, 133.2, 133.0, 132.8, 132.7, 131.9, 131.7, 129.5, 129.3, 127.7, 127.4, 127.2, 127.1, 125.8, 125.6, 118.6, 118.3, 116.9, 116.8, 110.0, 109.8, 60.6, 60.5, 52.4, 49.5, 37.4, 34.2, 33.1, 32.9, 21.3, 21.2, 14.4; HRMS ( $m/z$ , ESI-TOF): Calcd for  $\text{C}_{23}\text{H}_{25}\text{N}_2\text{O}_3^+$   $[\text{M}+\text{H}^+]$  377.1860, found 377.1856.



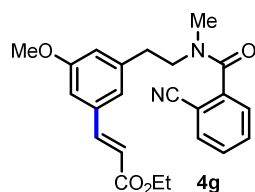

**(E)-ethyl-3-(3-(2-(2-cyano-N-methylbenzamido)ethyl)-5-methoxyphenyl)**

**acrylate:** The corresponding reaction was run with standard conditions and DMF (5 equiv) for 32 h. The two rotamers' ratio is about 54:46.  $^1\text{H}$  NMR (400 MHz,  $\text{CDCl}_3$ )  $\delta$  7.69 (d,  $J = 7.7$  Hz, 0.65H), 7.67-7.57 (m, 1.68H), 7.56-7.38 (m, 2.22H), 7.36 (d,  $J = 7.7$  Hz, 0.56H), 7.06 (s, 0.49H), 6.94-6.83 (m, 1.96H), 6.62 (s, 0.40H), 6.49 (s, 0.43H), 6.43 (d,  $J = 16.0$  Hz, 0.51H), 6.31 (d,  $J = 16.0$  Hz, 0.44H), 4.25 (q,  $J = 7.0$  Hz, 2.15H), 3.84-3.77 (m, 2.77H), 3.75 (s, 1.48H), 3.45 (t,  $J = 6.9$  Hz, 0.91H), 3.18 (s, 1.37H), 3.01 (t,  $J = 7.6$  Hz, 1.09H), 2.83 (s, 1.58H), 2.78 (t,  $J = 6.8$  Hz, 0.93H), 1.36-1.29 (m, 3.32H);  $^{13}\text{C}$  NMR (101 MHz,  $\text{CDCl}_3$ )  $\delta$  168.0, 167.6, 167.0, 166.8, 160.3, 160.3, 144.5, 144.0, 141.0, 140.7, 140.3, 139.8, 136.3, 136.1, 133.2, 133.0, 132.9, 132.7, 129.6, 129.4, 127.7, 127.4, 121.4, 121.1, 119.1, 118.9, 116.9, 116.8, 116.7, 111.4, 111.2, 110.0, 109.9, 60.7, 60.6, 55.5, 55.4, 52.3, 49.3, 37.4, 34.5, 33.4, 33.0, 14.4; HRMS ( $m/z$ , ESI-TOF): Calcd for  $\text{C}_{23}\text{H}_{25}\text{N}_2\text{O}_4$   $[\text{M}+\text{H}^+]$  393.1809, found 393.1805.

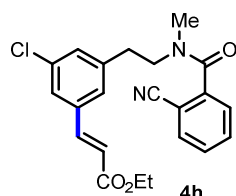

**(E)-ethyl-3-(3-chloro-5-(2-(2-cyano-N-methylbenzamido)ethyl)**

**phenyl)acrylate:** The corresponding reaction was run with standard conditions and DMF (5 equiv) for 32 h. The two rotamers' ratio is about 3:2.  $^1\text{H}$  NMR (400 MHz,  $\text{CDCl}_3$ )  $\delta$  7.73-7.57 (m, 2.11H), 7.56 (s, 0.38H), 7.54-7.44 (m, 1.93H), 7.41-7.32 (m, 2.15H), 7.30 (s, 0.56H), 6.95-6.83 (m, 1.07H), 6.44 (d,  $J = 16.0$  Hz, 0.58H), 6.33 (d,  $J = 16.0$  Hz, 0.38H), 4.24 (q,  $J = 6.9$  Hz, 2.07H), 3.78 (t,  $J = 7.6$  Hz, 1.28H), 3.45 (t,  $J = 6.8$  Hz, 0.78H), 3.17 (s, 1.32H), 3.02 (t,  $J = 7.6$  Hz, 1.26H), 2.84 (s, 1.79H), 2.84-2.76 (m, 0.87H), 1.31 (t,  $J = 7.0$  Hz, 3.15H);  $^{13}\text{C}$  NMR (101 MHz,  $\text{CDCl}_3$ )  $\delta$  167.9, 167.7, 166.6, 166.4, 142.9, 142.4, 141.4, 140.5, 140.3, 140.1, 136.7, 136.6, 135.3, 135.0, 133.2, 133.0, 132.8, 130.5, 130.3, 129.6, 129.6, 127.6, 127.4, 127.0, 126.7, 126.2, 126.1, 120.4, 120.1, 116.8, 116.7, 110.0, 109.8, 60.8, 60.7, 52.0, 49.2, 37.4, 34.1, 32.9, 14.3; HRMS ( $m/z$ , ESI-TOF): Calcd for  $\text{C}_{22}\text{H}_{22}\text{ClN}_2\text{O}_3$   $[\text{M}+\text{H}^+]$  397.1313, found 397.1309.

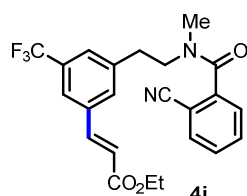

**(E)-ethyl-3-(3-(2-(2-cyano-N-methylbenzamido)ethyl)-5-(trifluoromethyl)**

**phenyl)acrylate:** The corresponding reaction was run with standard conditions at 90 °C for 48 h using HFIP as the sole solvent. The two rotamers' ratio is about 65:35.  $^1\text{H}$  NMR (400 MHz,  $\text{CDCl}_3$ )  $\delta$  7.80-7.60 (m, 3.97H), 7.58 (d,  $J = 3.1$  Hz, 0.70H), 7.55-7.45 (m, 1.61H), 7.39 (d,  $J = 7.7$  Hz, 0.76H), 7.25 (s, 0.32H), 7.15 (s, 0.33H), 6.95-6.88 (m, 0.30H), 6.53 (d,  $J = 16.1$  Hz, 0.59H), 6.43 (d,  $J = 16.0$  Hz, 0.34H), 4.34-4.22 (m, 2.00H), 3.89-3.78 (m, 1.30H), 3.51 (t,  $J = 7.0$  Hz, 0.71H), 3.22 (s, 1.03H), 3.14 (dd,  $J = 8.8, 6.6$  Hz, 1.31H), 2.95-2.83 (m, 2.74H), 1.40-1.30 (m, 3.00H);  $^{13}\text{C}$  NMR (101 MHz,  $\text{CDCl}_3$ )  $\delta$  167.9, 167.8, 166.5, 166.3, 142.6, 142.2, 140.7, 140.4, 140.1, 139.6, 136.0, 135.8, 133.2, 133.0, 133.0, 132.9, 131.9, 131.7, 131.6, 131.5, 131.3, 129.7, 129.6, 129.0, 127.4, 127.4, 127.1 (d,  $J_{C-F} = 3.7$  Hz), 126.7 (q,  $J_{C-F} = 3.6$  Hz), 125.6, 123.8

(d,  $J_{C-F} = 273.7$  Hz), 123.6 (d,  $J_{C-F} = 272.7$  Hz), 123.1 (q,  $J_{C-F} = 4.1$  Hz), 122.95 (q,  $J_{C-F} = 3.6$  Hz), 120.9, 120.6, 116.8, 116.7, 110.0, 109.9, 60.9, 60.8, 52.1, 49.1, 37.4, 34.3, 33.0, 33.0, 14.3; HRMS (m/z, ESI-TOF): Calcd for  $C_{23}H_{22}F_3N_2O_3^+$  [M+H<sup>+</sup>] 431.1577, found 431.1586.

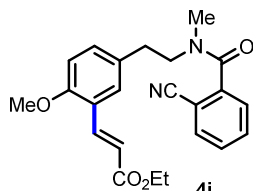

**(E)-ethyl-3-(5-(2-(2-cyano-N-methylbenzamido)ethyl)-2-methoxyphenyl)**

**acrylate:** The corresponding reaction was run with standard conditions and DMF (5 equiv) for 48 h. The two rotamers' ratio is about 55:45. <sup>1</sup>H NMR (400 MHz, CDCl<sub>3</sub>) δ 7.97 (d,  $J = 16.2$  Hz, 0.54H), 7.86 (d,  $J = 16.2$  Hz, 0.45H), 7.71 (d,  $J = 7.8$  Hz, 0.56H), 7.69-7.59 (m, 1.03H), 7.55-7.41 (m, 2.09H), 7.37 (d,  $J = 7.7$  Hz, 0.54H), 7.32 (d,  $J = 8.4$  Hz, 0.47H), 7.00-6.78 (m, 2.42H), 6.56 (d,  $J = 16.2$  Hz, 0.54H), 6.36 (d,  $J = 16.2$  Hz, 0.45H), 4.26 (q,  $J = 7.1$  Hz, 2.06H), 3.88 (s, 3.03H), 3.78 (dd,  $J = 8.8, 6.5$  Hz, 1.10H), 3.43 (t,  $J = 6.9$  Hz, 0.90H), 3.19 (s, 1.40H), 2.99 (t,  $J = 7.6$  Hz, 1.10H), 2.84 (s, 1.60H), 2.77 (t,  $J = 6.9$  Hz, 0.90H), 1.34 (td,  $J = 7.1, 3.0$  Hz, 3.03H); <sup>13</sup>C NMR (101 MHz, CDCl<sub>3</sub>) δ 168.0, 167.6, 167.6, 167.4, 157.4, 157.2, 140.7, 140.3, 139.9, 139.6, 133.2, 133.0, 132.9, 132.8, 132.0, 131.8, 130.9, 129.7, 129.5, 129.4, 129.3, 129.1, 127.7, 127.4, 123.8, 123.6, 119.4, 119.1, 116.9, 116.8, 111.6, 111.6, 110.1, 109.9, 60.5, 60.4, 55.8, 55.7, 52.7, 49.6, 37.4, 33.6, 33.0, 32.5, 14.5; HRMS (m/z, ESI-TOF): Calcd for  $C_{23}H_{25}N_2O_4^+$  [M+H<sup>+</sup>] 393.1809, found 393.1804.

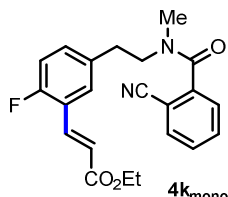

**(E)-ethyl-3-(5-(2-(2-cyano-N-methylbenzamido)ethyl)-2-fluorophenyl)**

**acrylate:** The corresponding reaction was run with standard conditions at 90 °C for 36 h. The two rotamers' ratio is about 3:2. <sup>1</sup>H NMR (400 MHz, CDCl<sub>3</sub>) δ 7.79 (d,  $J = 16.2$  Hz, 0.58H), 7.75-7.58 (m, 2.00H), 7.56-7.42 (m, 2.00H), 7.41-7.29 (m, 1.20H), 7.11-6.90 (m, 2.20H), 6.57 (d,  $J = 16.2$  Hz, 0.57H), 6.41 (d,  $J = 16.2$  Hz, 0.38H), 4.27 (q,  $J = 7.0$  Hz, 2.00H), 3.80 (t,  $J = 7.4$  Hz, 1.21H), 3.45 (t,  $J = 6.6$  Hz, 0.77H), 3.20 (s, 1.19H), 3.03 (t,  $J = 7.3$  Hz, 1.25H), 2.91-2.75 (m, 2.66H), 1.34 (t,  $J = 6.9$  Hz, 3.08H); <sup>13</sup>C NMR (101 MHz, CDCl<sub>3</sub>) δ 167.9, 167.7, 166.9, 166.6, 160.3 (d,  $J_{C-F} = 254$  Hz), 160.3 (d,  $J_{C-F} = 254$  Hz), 140.5, 140.2, 137.1, 136.7, 135.0 (d,  $J_{C-F} = 4$  Hz), 134.0 (d,  $J_{C-F} = 4$  Hz), 133.2, 133.0, 133.0, 132.8, 132.2 (d,  $J_{C-F} = 9$  Hz), 131.9 (d,  $J_{C-F} = 9$  Hz), 129.6, 129.5, 129.33 (d,  $J_{C-F} = 3$  Hz), 129.14 (d,  $J_{C-F} = 3$  Hz), 127.5, 127.4, 122.8 (d,  $J_{C-F} = 12$  Hz), 122.5 (d,  $J_{C-F} = 12$  Hz), 121.4 (d,  $J_{C-F} = 7$  Hz), 121.1 (d,  $J_{C-F} = 7$  Hz), 116.8, 116.7 (d,  $J_{C-F} = 5$  Hz), 116.5 (d,  $J_{C-F} = 3$  Hz), 116.3, 110.0, 109.9, 60.8, 60.7, 52.5, 49.4, 37.4, 33.7, 33.0, 32.5, 14.4; HRMS (m/z, ESI-TOF): Calcd for  $C_{22}H_{22}FN_2O_3^+$  [M+H<sup>+</sup>] 381.1609, found 381.1605.

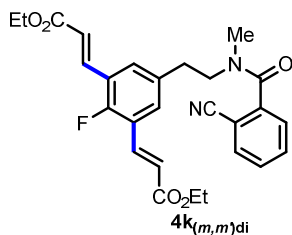

**(2E,2'E)-diethyl-3,3'-(5-(2-(2-cyano-N-methylbenzamido)ethyl)-2-**

**fluoro-1,3-phenylene)diacrylate:** The two rotamers' ratio is about 2:1. <sup>1</sup>H NMR (400 MHz,



CDCl<sub>3</sub>)  $\delta$  7.82 (d,  $J$  = 16.2 Hz, 1.30H), 7.77-7.61 (m, 2.50H), 7.57-7.46 (m, 2.75H), 7.39 (d,  $J$  = 7.7 Hz, 0.70H), 7.08 (d,  $J$  = 6.4 Hz, 0.70H), 7.01 (d,  $J$  = 7.3 Hz, 0.33H), 6.58 (d,  $J$  = 16.2 Hz, 1.27H), 6.42 (d,  $J$  = 16.2 Hz, 0.64H), 4.34-4.24 (m, 4.11H), 3.81 (t,  $J$  = 7.6 Hz, 1.34H), 3.49 (t,  $J$  = 6.9 Hz, 0.66H), 3.21 (s, 1.05H), 3.05 (t,  $J$  = 7.5 Hz, 1.37H), 2.92-2.80 (m, 2.84H), 1.40-1.31 (m, 6.21H); <sup>13</sup>C NMR (101 MHz, CDCl<sub>3</sub>)  $\delta$  167.9, 167.8, 166.7, 166.5, 158.6 (d,  $J_{C-F}$  = 263 Hz), 158.5 (d,  $J_{C-F}$  = 262 Hz), 140.5, 140.2, 136.4 (d,  $J_{C-F}$  = 4 Hz), 136.0 (d,  $J_{C-F}$  = 3 Hz), 135.2 (d,  $J_{C-F}$  = 4 Hz), 134.1 (d,  $J_{C-F}$  = 3 Hz), 133.3, 133.1, 133.0, 133.0, 130.7 (d,  $J_{C-F}$  = 3 Hz), 130.3 (d,  $J_{C-F}$  = 3 Hz), 129.7, 127.7, 127.4, 123.8 (d,  $J_{C-F}$  = 12 Hz), 123.6 (d,  $J_{C-F}$  = 13 Hz), 122.3 (d,  $J_{C-F}$  = 7 Hz), 122.0 (d,  $J_{C-F}$  = 6 Hz), 116.9, 116.8, 110.0, 61.0, 60.8, 52.3, 49.3, 37.4, 33.9, 33.1, 32.6, 14.4; HRMS (m/z, ESI-TOF): Calcd for C<sub>27</sub>H<sub>28</sub>FN<sub>2</sub>O<sub>5</sub><sup>+</sup> [M+H<sup>+</sup>] 479.1977, found 479.1966.

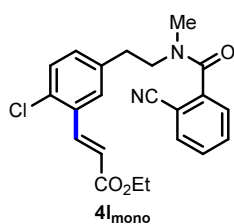

**(E)-ethyl-3-(2-chloro-5-(2-(2-cyano-N-methylbenzamido)ethyl)phenyl)**

**acrylate:** The corresponding reaction was run with standard conditions at 90 °C for 36 h. The NMR sample contains about 6% isomer. The two rotamers' ratio is about 5:3. <sup>1</sup>H NMR (400 MHz, CDCl<sub>3</sub>)  $\delta$  8.06 (d,  $J$  = 16.0 Hz, 0.57H), 7.99 (d,  $J$  = 16.0 Hz, 0.36H), 7.77-7.60 (m, 1.76H), 7.58 (s, 0.65H), 7.55-7.45 (m, 1.44H), 7.38 (d,  $J$  = 8.7 Hz, 1.21H), 7.34-7.25 (m, 1.23H), 7.13 (s, 0.36H), 6.92 (t,  $J$  = 9.7 Hz, 0.75H), 6.49 (d,  $J$  = 16.0 Hz, 0.57H), 6.24 (d,  $J$  = 16.0 Hz, 0.33H), 4.28 (q,  $J$  = 6.8 Hz, 2.02H), 3.81 (t,  $J$  = 7.5 Hz, 1.25H), 3.46 (t,  $J$  = 6.8 Hz, 0.75H), 3.20 (s, 1.16H), 3.04 (t,  $J$  = 7.5 Hz, 1.25H), 2.86 (s, 1.83H), 2.82 (t,  $J$  = 6.6 Hz, 0.83H), 1.39-1.30 (m, 3.03H); <sup>13</sup>C NMR (101 MHz, CDCl<sub>3</sub>)  $\delta$  167.9, 167.7, 166.6, 166.3, 140.5, 140.2, 140.1, 139.9, 138.0, 136.9, 133.5, 133.2, 133.2, 133.1, 133.0, 132.9, 132.8, 131.7, 131.4, 130.5, 130.4, 129.6, 129.5, 128.1, 127.9, 127.6, 127.4, 121.4, 121.2, 116.8, 116.8, 110.0, 109.9, 60.8, 60.7, 52.4, 49.2, 37.4, 34.0, 33.1, 32.7, 14.4; HRMS (m/z, ESI-TOF): Calcd for C<sub>22</sub>H<sub>22</sub>ClN<sub>2</sub>O<sub>3</sub><sup>+</sup> [M+H<sup>+</sup>] 397.1313, found 397.1309.

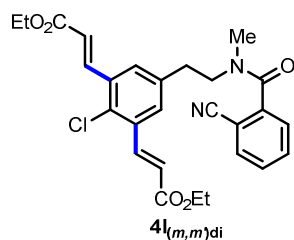

**(2E,2'E)-diethyl-3,3'-(2-chloro-5-(2-(2-cyano-N-methylbenzamido)**

**ethyl)-1,3-phenylene)diacrylate:** The two rotamers' ratio is about 65:35. <sup>1</sup>H NMR (400 MHz, CDCl<sub>3</sub>)  $\delta$  8.11 (d,  $J$  = 16.0 Hz, 1.23H), 8.04 (d,  $J$  = 16.0 Hz, 0.63H), 7.76-7.63 (m, 1.88H), 7.60 (s, 1.23H), 7.56-7.47 (m, 1.38H), 7.39 (d,  $J$  = 7.6 Hz, 0.71H), 7.15 (s, 0.65H), 6.98 (d,  $J$  = 7.3 Hz, 0.30H), 6.47 (d,  $J$  = 16.0 Hz, 1.29H), 6.24 (d,  $J$  = 16.0 Hz, 0.67H), 4.29 (q,  $J$  = 7.1 Hz, 4.00H), 3.83 (t,  $J$  = 7.6 Hz, 1.30H), 3.49 (t,  $J$  = 6.8 Hz, 0.70H), 3.22 (s, 1.00H), 3.06 (t,  $J$  = 7.7 Hz, 1.30H), 2.90 (s, 2.00H), 2.84 (t,  $J$  = 7.2 Hz, 0.73H), 1.41-1.31 (m, 6.02H); <sup>13</sup>C NMR (101 MHz, CDCl<sub>3</sub>)  $\delta$  167.9, 167.8, 166.4, 166.2, 140.4, 140.4, 140.1, 140.0, 137.9, 136.9, 134.6, 134.4, 133.6, 133.4, 133.3, 133.1, 133.0, 132.9, 129.7, 129.5, 129.1, 127.7, 127.4, 122.4, 122.2, 116.8, 116.8, 110.0, 110.0, 61.0, 60.9, 52.3, 49.1, 37.4, 34.1, 33.1, 32.8, 14.4; HRMS (m/z, ESI-TOF): Calcd for C<sub>27</sub>H<sub>28</sub>ClN<sub>2</sub>O<sub>5</sub><sup>+</sup> [M+H<sup>+</sup>] 495.1681, found 495.1669.

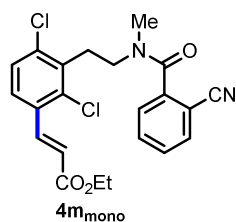

**(E)-ethyl-3-(2,4-dichloro-3-(2-(2-cyano-N-methylbenzamido)ethyl)phenyl)**

**acrylate:** The corresponding reaction was run with standard conditions at 90 °C for 48 h using HFIP as the sole solvent. The two rotamers' ratio is about 62:38.  $^1\text{H}$  NMR (400 MHz,  $\text{CDCl}_3$ )  $\delta$  8.08 (d,  $J = 16.0$  Hz, 0.36H), 7.90 (d,  $J = 16.0$  Hz, 0.59H), 7.75-7.63 (m, 1.45H), 7.58 (td,  $J = 7.7$ , 1.4 Hz, 0.65H), 7.55-7.38 (m, 2.47H), 7.35 (d,  $J = 8.4$  Hz, 0.40H), 7.32-7.21 (m, 1.34H), 6.44-6.30 (m, 0.97H), 4.33-4.22 (m, 2.00H), 3.82 (dd,  $J = 8.7$ , 6.3 Hz, 0.79H), 3.50-3.36 (m, 2H), 3.30 (s, 1.90H), 3.20 (dd,  $J = 9.4$ , 6.2 Hz, 1.30H), 2.96 (s, 1.16H), 1.39-1.30 (m, 3.03H);  $^{13}\text{C}$  NMR (101 MHz,  $\text{CDCl}_3$ )  $\delta$  167.8, 167.6, 166.2, 166.1, 140.5, 140.2, 139.7, 137.1, 136.8, 136.1, 135.8, 135.8, 134.2, 133.1, 132.9, 132.9, 132.9, 132.6, 132.4, 129.5, 129.4, 128.3, 128.3, 127.4, 126.7, 126.5, 122.0, 121.7, 116.8, 110.1, 109.9, 60.8, 60.8, 48.6, 45.9, 37.1, 33.3, 30.6, 29.3, 14.3; HRMS ( $m/z$ , ESI-TOF): Calcd for  $\text{C}_{22}\text{H}_{21}\text{Cl}_2\text{N}_2\text{O}_3^+$  [ $\text{M}+\text{H}^+$ ] 431.0924, found 431.0934.

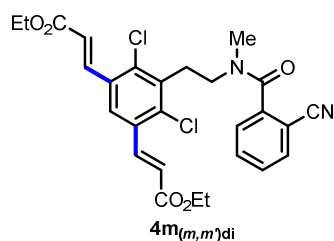

**(2E,2'E)-diethyl-3,3'-(4,6-dichloro-5-(2-(2-cyano-N-methylbenz**

**amido)ethyl)-1,3-phenylene)diacrylate:** The two rotamers' ratio is about 60:40.  $^1\text{H}$  NMR (400 MHz,  $\text{CDCl}_3$ )  $\delta$  8.04 (d,  $J = 15.9$  Hz, 0.74H), 7.88 (d,  $J = 15.9$  Hz, 1.11H), 7.73 (s, 0.40H), 7.71-7.61 (m, 2.12H), 7.57 (t,  $J = 7.4$  Hz, 0.63H), 7.49 (t,  $J = 7.6$  Hz, 1.06H), 7.43 (d,  $J = 7.8$  Hz, 0.40H), 7.29 (d,  $J = 7.6$  Hz, 0.58H), 6.46-6.33 (m, 1.80H), 4.32-4.19 (m, 4.00H), 3.80 (dd,  $J = 8.9$ , 6.2 Hz, 0.80H), 3.47 (dd,  $J = 8.8$ , 6.3 Hz, 0.80H), 3.39 (dd,  $J = 9.7$ , 6.2 Hz, 1.20H), 3.28 (s, 1.80H), 3.23 (dd,  $J = 9.9$ , 6.0 Hz, 1.20H), 2.96 (s, 1.20H), 1.40-1.30 (m, 6.04H);  $^{13}\text{C}$  NMR (101 MHz,  $\text{CDCl}_3$ )  $\delta$  167.9, 167.7, 166.1, 165.9, 140.5, 140.3, 140.0, 139.5, 137.1, 136.9, 136.7, 135.3, 133.2, 133.0, 133.0, 132.8, 132.6, 129.6, 127.5, 124.8, 124.6, 122.8, 122.5, 116.8, 116.8, 110.3, 110.0, 61.0, 61.0, 48.5, 45.8, 37.2, 33.4, 31.3, 29.9, 14.3; HRMS ( $m/z$ , ESI-TOF): Calcd for  $\text{C}_{27}\text{H}_{27}\text{Cl}_2\text{N}_2\text{O}_5^+$  [ $\text{M}+\text{H}^+$ ] 529.1392, found 529.1297.

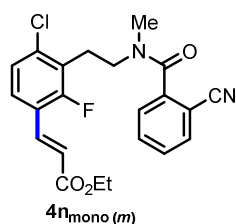

**(E)-ethyl-3-(4-chloro-3-(2-(2-cyano-N-methylbenzamido)ethyl)-2-fluoro**

**phenyl)acrylate:** The corresponding reaction was run with standard conditions and ethyl acrylate (2.5 equiv) at 90 °C for 48 h using HFIP as the sole solvent. The two rotamers' ratio is about 56:44.  $^1\text{H}$  NMR (400 MHz,  $\text{CDCl}_3$ )  $\delta$  7.78 (d,  $J = 16.3$  Hz, 0.43H), 7.73-7.59 (m, 1.98H), 7.59-7.45 (m, 1.73H), 7.44-7.32 (m, 1.39H), 7.23 (d,  $J = 8.2$  Hz, 0.42H), 7.14-7.06 (m, 1.04H), 6.52 (d,  $J = 16.2$  Hz, 0.41H), 6.44 (d,  $J = 16.1$  Hz, 0.52H), 4.28 (q,  $J = 7.0$  Hz, 2.00H), 3.83 (t,  $J = 6.9$  Hz, 0.89H), 3.45 (t,  $J = 7.0$  Hz, 1.17H), 3.33-3.21 (m, 2.61H), 3.04 (t,  $J = 7.0$  Hz, 1.16H), 2.93 (s, 1.31H), 1.34 (t,  $J = 7.0$  Hz, 3.02H);  $^{13}\text{C}$  NMR (101 MHz,  $\text{CDCl}_3$ )  $\delta$  167.9, 167.6, 166.6,

166.4, 160.1 (d,  $J_{C-F} = 257$  Hz), 159.8 (d,  $J_{C-F} = 256$  Hz), 140.5, 140.1, 137.2 (d,  $J_{C-F} = 6$  Hz), 136.9 (d,  $J_{C-F} = 6$  Hz), 136.2 (d,  $J_{C-F} = 3$  Hz), 135.7 (d,  $J_{C-F} = 3$  Hz), 133.1, 133.0, 132.9, 132.8, 129.5, 129.5, 127.6 (d,  $J_{C-F} = 4$  Hz), 127.4 (d,  $J_{C-F} = 3$  Hz), 127.4, 125.7, 125.7, 125.6, 125.6, 125.5, 124.14 (d,  $J_{C-F} = 19$  Hz), 121.71 (d,  $J_{C-F} = 6$  Hz), 121.58 (d,  $J_{C-F} = 14$  Hz), 121.4, 121.3 (d,  $J_{C-F} = 7$  Hz), 116.8, 116.7, 110.0, 110.0, 60.8, 60.8, 49.3, 46.4, 37.1, 33.2, 25.6 (d,  $J_{C-F} = 4$  Hz), 24.4 (d,  $J_{C-F} = 6$  Hz), 14.3; HRMS (m/z, ESI-TOF): Calcd for  $C_{22}H_{21}ClFN_2O_3^+$  [M+H<sup>+</sup>] 415.1219, found 415.1227.

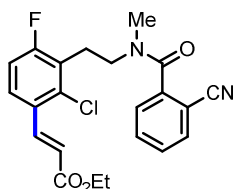

4n<sub>mono</sub>(m')

**(E)-ethyl-3-(2-chloro-3-(2-(2-cyano-N-methylbenzamido)ethyl)-4-fluoro**

**phenyl)acrylate:** The two rotamers' ratio is about 62:38. <sup>1</sup>H NMR (400 MHz, CDCl<sub>3</sub>) δ 8.06 (d,  $J = 16.0$  Hz, 0.35H), 7.87 (d,  $J = 15.9$  Hz, 0.57H), 7.75-7.58 (m, 1.60H), 7.55-7.43 (m, 2.63H), 7.40 (d,  $J = 7.7$  Hz, 0.40H), 7.08-6.93 (m, 1.50H), 6.39-6.27 (m, 0.90H), 4.26 (q,  $J = 7.1$  Hz, 2.00H), 3.81 (t,  $J = 7.2$  Hz, 0.84H), 3.45 (t,  $J = 7.2$  Hz, 1.20H), 3.33-3.19 (m, 2.72H), 3.07-2.99 (m, 1.21H), 2.90 (s, 1.20H), 1.32 (t,  $J = 7.1$  Hz, 3.03H); <sup>13</sup>C NMR (101 MHz, CDCl<sub>3</sub>) δ 167.9, 167.7, 166.4, 166.3, 162.4 (d,  $J_{C-F} = 254$  Hz), 162.2 (d,  $J_{C-F} = 254$  Hz), 140.5, 140.2, 140.1, 139.7, 136.2 (d,  $J_{C-F} = 6$  Hz), 136.0 (d,  $J_{C-F} = 5$  Hz), 133.2, 133.0, 132.9, 132.8, 130.0 (d,  $J_{C-F} = 4$  Hz), 129.9 (d,  $J_{C-F} = 4$  Hz), 129.6, 129.5, 127.5, 127.4, 127.3 (d,  $J_{C-F} = 10.0$  Hz), 127.1 (d,  $J_{C-F} = 10$  Hz), 125.8 (d,  $J_{C-F} = 19$  Hz), 124.2 (d,  $J_{C-F} = 19$  Hz), 121.3 (d,  $J_{C-F} = 2$  Hz), 121.0 (d,  $J_{C-F} = 2$  Hz), 116.8, 116.7, 114.7 (d,  $J_{C-F} = 22$  Hz), 114.5 (d,  $J_{C-F} = 22$  Hz), 110.1, 110.0, 60.9, 60.8, 49.1, 46.5, 37.2, 33.2, 25.7 (d,  $J_{C-F} = 2$  Hz), 24.7 (d,  $J_{C-F} = 2$  Hz), 14.4; HRMS (m/z, ESI-TOF): Calcd for  $C_{22}H_{21}ClFN_2O_3^+$  [M+H<sup>+</sup>] 415.1219, found 415.1227.

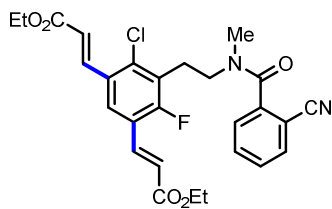

4n<sub>(m,m)</sub>di

**(2E,2'E)-diethyl-3,3'-(4-chloro-5-(2-(2-cyano-N-methylbenzamido)**

**ethyl)-6-fluoro-1,3-phenylene)diacrylate:** The two rotamers' ratio is about 56:44. <sup>1</sup>H NMR (400 MHz, CDCl<sub>3</sub>) δ 8.06 (d,  $J = 15.9$  Hz, 0.44H), 7.88 (d,  $J = 15.9$  Hz, 0.56H), 7.77 (d,  $J = 16.2$  Hz, 0.54H), 7.74-7.61 (m, 2.87H), 7.59-7.45 (m, 1.66H), 7.40 (d,  $J = 7.6$  Hz, 0.45H), 7.13-7.06 (m, 0.54H), 6.58 (d,  $J = 16.2$  Hz, 0.44H), 6.51 (d,  $J = 16.2$  Hz, 0.50H), 6.45-6.33 (m, 0.93H), 4.40-4.20 (m, 4.00H), 3.83 (t,  $J = 7.2$  Hz, 0.90H), 3.47 (t,  $J = 7.3$  Hz, 1.10H), 3.37-3.23 (m, 2.55H), 3.08 (t,  $J = 6.5$  Hz, 1.11H), 2.95 (s, 1.35H), 1.35 (t,  $J = 7.1$  Hz, 6.06H); <sup>13</sup>C NMR (101 MHz, CDCl<sub>3</sub>) δ 167.8, 167.7, 166.3, 166.1, 166.0, 160.4 (d,  $J_{C-F} = 260$  Hz), 160.1 (d,  $J_{C-F} = 260$  Hz), 140.3, 140.0, 139.6, 139.1, 137.3 (d,  $J_{C-F} = 6$  Hz), 136.9 (d,  $J_{C-F} = 6$  Hz), 135.7 (d,  $J_{C-F} = 2$  Hz), 135.2 (d,  $J_{C-F} = 2$  Hz), 133.1, 133.0, 132.9, 132.9, 130.9, 130.2 (d,  $J_{C-F} = 4$  Hz), 130.1 (d,  $J_{C-F} = 4$  Hz), 129.6, 129.5, 128.8, 127.4, 127.3, 126.5 (d,  $J_{C-F} = 19$  Hz), 125.9 (d,  $J_{C-F} = 4$  Hz), 125.8 (d,  $J_{C-F} = 4$  Hz), 124.9 (d,  $J_{C-F} = 19$  Hz), 122.6 (d,  $J_{C-F} = 6$  Hz), 122.3 (d,  $J_{C-F} = 6$  Hz), 122.1, 122.0, 121.8, 121.7, 121.6, 116.7, 116.7, 110.1, 110.0, 60.9, 60.8, 49.0, 46.3, 37.1, 33.1, 25.9 (d,  $J_{C-F} = 2$  Hz), 24.7 (d,  $J_{C-F} = 2$  Hz), 14.3; HRMS (m/z, ESI-TOF): Calcd for  $C_{27}H_{27}ClFN_2O_5^+$  [M+H<sup>+</sup>] 513.1587, found 513.1593.

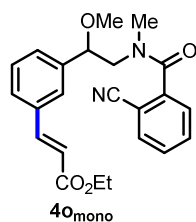

**(E)-ethyl-3-(3-(2-(2-cyano-N-methylbenzamido)-1-methoxyethyl) phenyl)**

**acrylate:** The corresponding reaction was run with standard conditions and DMF (5 equiv) for 48 h. The two rotamers' ratio is about 62:38. <sup>1</sup>H NMR (400 MHz, CDCl<sub>3</sub>) δ 7.80-7.59 (m, 3.35H), 7.60-7.37 (m, 4.62H), 7.33 (t, *J* = 7.7 Hz, 0.40H), 7.19 (d, *J* = 7.5 Hz, 0.38H), 7.13 (s, 0.35H), 7.06 (d, *J* = 7.4 Hz, 0.36H), 6.50 (d, *J* = 16.0 Hz, 0.58H), 6.35 (d, *J* = 16.0 Hz, 0.36H), 4.74 (dd, *J* = 8.6, 3.4 Hz, 0.60H), 4.39-4.22 (m, 2.42H), 3.99 (dd, *J* = 13.7, 3.5 Hz, 0.60H), 3.55-3.30 (m, 3.45H), 3.30-3.18 (m, 2.50H), 2.97 (s, 2.00H), 1.34 (t, *J* = 7.1 Hz, 3.06H); <sup>13</sup>C NMR (101 MHz, CDCl<sub>3</sub>) δ 168.7, 168.0, 167.0, 166.8, 144.3, 143.8, 140.7, 140.5, 140.5, 139.6, 135.2, 135.0, 133.1, 133.0, 132.9, 132.6, 129.5, 129.5, 129.4, 129.3, 128.7, 128.4, 128.4, 128.1, 127.9, 127.2, 126.1, 125.8, 119.1, 118.9, 116.9, 116.8, 110.5, 110.1, 82.1, 81.0, 60.7, 60.6, 57.4, 57.3, 57.2, 54.9, 39.3, 34.1, 14.4; HRMS (*m/z*, ESI-TOF): Calcd for C<sub>23</sub>H<sub>25</sub>N<sub>2</sub>O<sub>4</sub><sup>+</sup> [M+H<sup>+</sup>] 393.1809, found 393.1807.

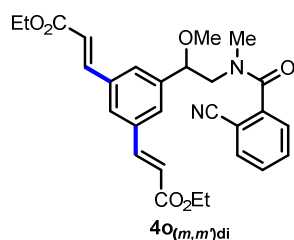

**(2E,2'E)-diethyl-3,3'-(5-(2-(2-cyano-N-methylbenzamido)-1-methoxyethyl)-1,3-phenylene)diacrylate:**

The two rotamers' ratio is about 68:32. <sup>1</sup>H NMR (400 MHz, CDCl<sub>3</sub>) δ 7.87-7.46 (m, 7.32H), 7.41 (d, *J* = 7.7 Hz, 0.68H), 7.24 (d, *J* = 7.6 Hz, 0.34H), 7.15 (s, 0.56H), 6.53 (d, *J* = 16.0 Hz, 1.29H), 6.38 (d, *J* = 16.0 Hz, 0.64H), 4.77 (d, *J* = 6.5 Hz, 0.68H), 4.46-4.17 (m, 4.32H), 4.03 (d, *J* = 12.7 Hz, 0.66H), 3.53-3.31 (m, 3.41H), 3.26 (s, 2.00H), 3.11-2.93 (m, 2.06H), 1.35 (t, *J* = 7.0 Hz, 6.07H); <sup>13</sup>C NMR (101 MHz, CDCl<sub>3</sub>) δ 168.7, 168.0, 166.7, 166.5, 143.4, 143.0, 141.5, 140.6, 140.5, 140.4, 136.0, 135.8, 133.2, 133.1, 132.7, 129.6, 129.5, 128.1, 127.5, 127.3, 127.2, 120.2, 119.9, 116.9, 116.9, 110.6, 110.1, 82.1, 81.0, 60.8, 60.7, 57.5, 57.4, 55.0, 54.9, 39.4, 34.2, 14.4; HRMS (*m/z*, ESI-TOF): Calcd for C<sub>28</sub>H<sub>31</sub>N<sub>2</sub>O<sub>6</sub><sup>+</sup> [M+H<sup>+</sup>] 491.2177, found 491.2166.

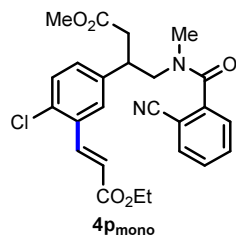

**(E)-methyl-3-(4-chloro-3-(3-ethoxy-3-oxoprop-1-enyl)phenyl)-4-(2-cyano-N-methylbenzamido)butanoate:**

The corresponding reaction was run with standard conditions at 90 °C for 48 h. The two rotamers' ratio is about 74:26. <sup>1</sup>H NMR (400 MHz, CDCl<sub>3</sub>) δ 8.06 (d, *J* = 16.0 Hz, 0.68H), 7.99 (d, *J* = 16.0 Hz, 0.24H), 7.80-7.55 (m, 2.72H), 7.53-7.44 (m, 1.33H), 7.40 (d, *J* = 8.3 Hz, 0.68H), 7.32 (dd, *J* = 8.3, 2.1 Hz, 0.94H), 7.17 (d, *J* = 7.7 Hz, 0.67H), 7.10 (d, *J* = 1.7 Hz, 0.24H), 6.93 (dd, *J* = 8.2, 1.8 Hz, 0.25H), 6.81 (brs, 0.22H), 6.51 (d, *J* = 16.0 Hz, 0.67H), 6.20 (d, *J* = 16.0 Hz, 0.25H), 4.36-4.23 (m, 2.00H), 3.97 (dd, *J* = 13.0, 6.9 Hz,

0.68H), 3.83-3.36 (m, 5.49H), 3.16 (s, 0.78H), 2.88 (dd,  $J = 16.3, 5.8$  Hz, 0.74H), 2.84-2.69 (m, 2.82H), 2.59-2.44 (m, 0.62H), 1.42-1.31 (m, 3.08H);  $^{13}\text{C}$  NMR (101 MHz,  $\text{CDCl}_3$ )  $\delta$  172.0, 171.3, 168.2, 167.9, 166.6, 166.3, 140.4, 140.3, 140.2, 139.8, 139.6, 139.5, 134.2, 133.8, 133.4, 133.2, 133.1, 133.1, 133.0, 132.7, 130.8, 130.6, 130.5, 129.7, 129.6, 128.2, 127.3, 127.3, 126.5, 121.8, 121.5, 116.9, 116.7, 110.0, 60.9, 60.8, 56.4, 52.1, 52.1, 51.9, 40.0, 39.7, 38.3, 37.4, 33.6, 14.4; HRMS ( $m/z$ , ESI-TOF): Calcd for  $\text{C}_{25}\text{H}_{26}\text{ClN}_2\text{O}_5^+$  [ $\text{M}+\text{H}^+$ ] 469.1525, found 469.1530.

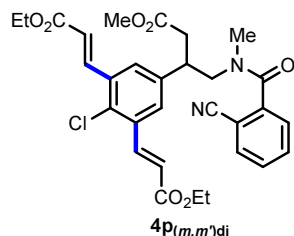

**(2*E*,2'*E*)-diethyl-3,3'-(2-chloro-5-(1-(2-cyano-*N*-methylbenzamido)-4-methoxy-4-oxobutan-2-yl)-1,3-phenylene)diacrylate:** The two rotamers' ratio is about 77:23.  $^1\text{H}$  NMR (400 MHz,  $\text{CDCl}_3$ )  $\delta$  8.11 (d,  $J = 16.0$  Hz, 1.44H), 8.05 (d,  $J = 16.0$  Hz, 0.44H), 7.72-7.56 (m, 3.41H), 7.53-7.42 (m, 1.36H), 7.17 (d,  $J = 7.7$  Hz, 0.72H), 7.14 (s, 0.43H), 6.81 (s, 0.18H), 6.49 (d,  $J = 16.0$  Hz, 1.42H), 6.21 (d,  $J = 16.0$  Hz, 0.45H), 4.30-4.23 (m, 4.00H), 3.94 (dd,  $J = 13.5, 7.5$  Hz, 0.71H), 3.85 (dd,  $J = 13.6, 8.1$  Hz, 0.71H), 3.77-3.41 (m, 5.11H), 3.18 (s, 0.72H), 2.90 (dd,  $J = 16.3, 5.7$  Hz, 0.76H), 2.82 (s, 2.05H), 2.75 (dd,  $J = 16.3, 8.8$  Hz, 1.06H), 2.52 (dd,  $J = 12.9, 6.5$  Hz, 0.45H), 1.41-1.32 (m, 6.15H); HRMS ( $m/z$ , ESI-TOF):  $^{13}\text{C}$  NMR (101 MHz,  $\text{CDCl}_3$ )  $\delta$  171.9, 171.1, 168.3, 167.9, 166.4, 166.1, 140.3, 140.2, 139.9, 139.5, 139.5, 134.9, 134.5, 134.2, 134.0, 133.3, 133.1, 132.8, 129.7, 128.6, 128.2, 128.0, 127.3, 122.7, 122.5, 116.9, 116.7, 109.9, 61.1, 60.9, 56.3, 52.2, 52.0, 51.8, 40.1, 39.7, 38.3, 37.4, 37.4, 33.7, 14.4; Calcd for  $\text{C}_{30}\text{H}_{32}\text{ClN}_2\text{O}_7^+$  [ $\text{M}+\text{H}^+$ ] 567.1893, found 567.1897.

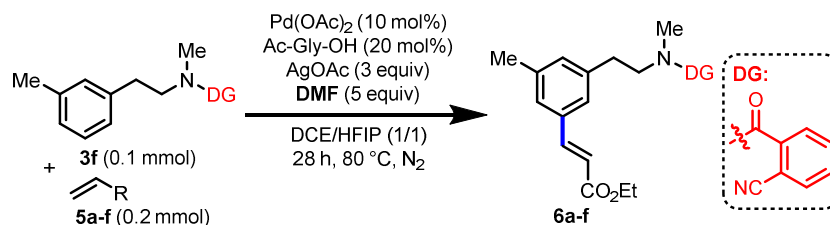

A 50 mL Schlenk sealed tube (with a Teflon cap) equipped with a magnetic stir bar was charged with amide **3f** (0.10 mmol, 1.0 equiv),  $\text{Pd}(\text{OAc})_2$  (2.3 mg, 0.010 mmol, 10 mol%), Ac-Gly-OH (2.4 mg, 0.020 mmol, 20 mol%) and AgOAc (50 mg, 0.30 mmol, 3 equiv). The tube was then purged with nitrogen. DCE (0.5 mL) was added to the mixture, followed by olefin **5** (2.0 equiv) and DMF (39  $\mu\text{L}$ , 0.5 mmol, 5 equiv). And then 0.5 mL of HFIP was added along the inside wall of the tube. The tube was then capped under a flow of nitrogen and submerged into a preheated 80  $^\circ\text{C}$  oil bath. The reaction was stirred for 28 h and cooled to room temperature. The crude reaction mixture was diluted with EtOAc (5 mL) and filtered through a short pad of Celite. The sealed tube and Celite pad were washed with an additional 20 mL of EtOAc. The filtrate was concentrated *in vacuo*, and the resulting residue was purified by preparative thin layer chromatography using petroleum ether/EtOAc as the eluent. The site selectivity was assigned by  $^1\text{H}$  NMR analysis of the product.

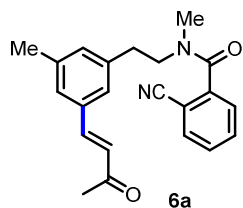

**(E)-2-cyano-N-methyl-N-(3-methyl-5-(3-oxobut-1-enyl)phenethyl)**

**benzamide:** The corresponding reaction was run with standard conditions and DMF (5 equiv) for 28 h. The two rotamers' ratio is about 57:43. <sup>1</sup>H NMR (400 MHz, CDCl<sub>3</sub>) δ 7.72 (d, *J* = 7.7 Hz, 0.61H), 7.70-7.60 (m, 1.10H), 7.54-7.43 (m, 2.24H), 7.42-7.34 (m, 1.00H), 7.32 (s, 0.56H), 7.24 (s, 0.94H), 7.20 (s, 0.54H), 6.89 (s, 0.44H), 6.87-6.81 (m, 0.44H), 6.79 (s, 0.43H), 6.74 (d, *J* = 16.3 Hz, 0.59H), 6.61 (d, *J* = 16.3 Hz, 0.43H), 3.80 (dd, *J* = 8.5, 6.9 Hz, 1.14H), 3.47 (t, *J* = 6.9 Hz, 0.86H), 3.20 (s, 1.33H), 3.07-2.99 (m, 1.15H), 2.86 (s, 1.72H), 2.80 (t, *J* = 6.9 Hz, 0.88H), 2.42-2.33 (m, 4.54H), 2.30 (s, 1.39H); <sup>13</sup>C NMR (101 MHz, CDCl<sub>3</sub>) δ 198.6, 198.3, 168.0, 167.6, 143.6, 143.1, 140.6, 140.3, 139.6, 139.3, 139.1, 138.5, 135.0, 134.8, 133.2, 133.0, 132.8, 132.8, 132.2, 131.9, 129.6, 129.4, 127.7, 127.5, 127.4, 127.3, 127.2, 126.2, 125.9, 116.9, 116.8, 110.0, 109.9, 52.4, 49.5, 37.4, 34.3, 33.2, 33.0, 27.7, 21.3, 21.3; HRMS (*m/z*, ESI-TOF): Calcd for C<sub>22</sub>H<sub>23</sub>N<sub>2</sub>O<sub>2</sub><sup>+</sup> [*M*+*H*<sup>+</sup>] 347.1754, found 347.1765.

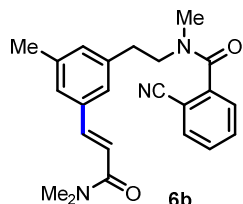

**(E)-2-cyano-N-(3-(3-(dimethylamino)-3-oxoprop-1-enyl)-5-methyl**

**phenethyl)-N-methylbenzamide:** The corresponding reaction was run with standard conditions and DMF (5 equiv) for 28 h. The two rotamers' ratio is about 55:45. <sup>1</sup>H NMR (400 MHz, CDCl<sub>3</sub>) δ 7.71 (d, *J* = 7.7 Hz, 0.56H), 7.68-7.58 (m, 1.53H), 7.57-7.41 (m, 1.97H), 7.37 (d, *J* = 7.7 Hz, 0.56H), 7.33 (s, 0.51H), 7.20 (d, *J* = 8.6 Hz, 0.95H), 7.14 (s, 0.51H), 6.93 (d, *J* = 15.4 Hz, 0.53H), 6.87-6.78 (m, 1.32H), 6.75 (s, 0.44H), 3.81 (t, *J* = 7.6 Hz, 1.11H), 3.46 (t, *J* = 6.8 Hz, 0.89H), 3.25-3.13 (m, 4.39H), 3.07 (s, 3.00H), 3.03 (dd, *J* = 8.6, 6.6 Hz, 1.18H), 2.83 (s, 1.65H), 2.79 (t, *J* = 6.8 Hz, 0.88H), 2.36 (s, 1.60H), 2.30 (s, 1.32H); <sup>13</sup>C NMR (101 MHz, CDCl<sub>3</sub>) δ 168.0, 167.6, 166.9, 166.7, 142.4, 142.0, 140.7, 140.3, 139.3, 139.0, 138.9, 138.2, 136.0, 135.8, 133.2, 133.0, 132.9, 132.7, 131.1, 131.0, 129.5, 129.4, 127.7, 127.4, 127.4, 126.9, 125.6, 125.1, 117.9, 117.6, 116.9, 116.9, 110.1, 109.9, 52.5, 49.5, 37.6, 37.6, 37.5, 36.0, 34.3, 33.3, 33.0, 21.3; HRMS (*m/z*, ESI-TOF): Calcd for C<sub>23</sub>H<sub>26</sub>N<sub>3</sub>O<sub>2</sub><sup>+</sup> [*M*+*H*<sup>+</sup>] 376.2020, found 376.2028.

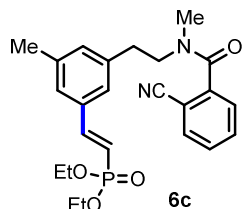

**(E)-diethyl-3-(2-(2-cyano-N-methylbenzamido)ethyl)-5-methylstyryl**

**phosphonate:** The corresponding reaction was run with standard conditions and DMF (5 equiv) for 28 h. The two rotamers' ratio is about 56:44. <sup>1</sup>H NMR (400 MHz, CDCl<sub>3</sub>) δ 7.71 (d, *J* = 7.8 Hz, 0.58H), 7.70-7.61 (m, 1.00H), 7.57-7.43 (m, 2.00H), 7.44-7.28 (m, 1.17H), 7.26 (s, 0.49H), 7.19 (s, 1.52H), 6.86 (d, *J* = 8.1 Hz, 0.45H), 6.81 (s, 0.42H), 6.78 (s, 0.41H), 6.28 (t, *J* = 17.7 Hz, 0.56H), 6.15 (t, *J* = 17.5 Hz, 0.44H), 4.20-4.07 (m, 4.01H), 3.87-3.75 (m, 1.10H), 3.46 (t, *J* = 6.9 Hz, 0.90H), 3.20 (s, 1.34H), 3.08-2.98 (m, 1.13H), 2.85 (s, 1.72H), 2.80 (t, *J* = 6.9 Hz, 0.88H), 2.36 (s, 1.70H), 2.30 (s, 1.34H), 1.44-1.30 (m, 6.08H); <sup>13</sup>C NMR (101 MHz, CDCl<sub>3</sub>) δ 167.9,



167.6, 148.8 (d,  $J_{C-P} = 7$  Hz), 148.3 (d,  $J_{C-P} = 7$  Hz), 140.7, 140.3, 139.5, 139.2, 139.0, 138.3, 135.6, 135.4, 135.3, 135.1, 133.2, 133.0, 132.9, 132.8, 131.9, 131.6, 129.6, 129.4, 127.7, 127.4, 126.9, 125.4, 125.3, 116.9, 116.8, 115.5, 115.0, 113.6, 113.1, 110.0, 109.9, 61.9 (d,  $J_{C-P} = 5$  Hz), 61.9 (d,  $J_{C-P} = 5$  Hz), 52.4, 49.5, 37.4, 34.3, 33.2, 33.0, 21.3, 21.3, 16.5 (d,  $J_{C-P} = 7$  Hz); HRMS (m/z, ESI-TOF): Calcd for  $C_{24}H_{30}N_2O_4P^+$   $[M+H]^+$  441.1938, found 441.1946.

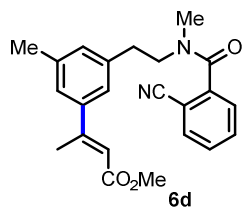

**6d (E)-methyl-3-(3-(2-(2-cyano-N-methylbenzamido)ethyl)-5-methylphenyl)**

**but-2-enoate:** The corresponding reaction was run with standard conditions and DMF (5 equiv) for 28 h. The two rotamers' ratio is about 52:48.  $^1H$  NMR (400 MHz,  $CDCl_3$ )  $\delta$  7.71 (d,  $J = 7.7$  Hz, 0.56H), 7.69-7.61 (m, 0.99H), 7.55-7.42 (m, 1.65H), 7.39 (d,  $J = 7.7$  Hz, 0.47H), 7.21 (s, 0.57H), 7.19-7.13 (m, 1.39H), 6.86-6.78 (m, 0.47H), 6.77 (d,  $J = 6.7$  Hz, 0.82H), 6.14 (q,  $J = 1.4$  Hz, 0.46H), 6.00 (q,  $J = 1.4$  Hz, 0.42H), 3.84-3.74 (m, 4.16H), 3.45 (t,  $J = 6.9$  Hz, 0.90H), 3.21 (s, 1.38H), 3.08-2.98 (m, 1.02H), 2.86 (s, 1.58H), 2.80 (t,  $J = 6.9$  Hz, 1.04H), 2.57 (d,  $J = 0.9$  Hz, 1.51H), 2.49 (d,  $J = 1.0$  Hz, 1.45H), 2.37 (s, 1.56H), 2.30 (s, 1.44H);  $^{13}C$  NMR (101 MHz,  $CDCl_3$ )  $\delta$  168.0, 167.6, 167.4, 167.2, 156.1, 155.6, 142.9, 142.6, 140.7, 140.4, 139.1, 138.8, 138.6, 138.0, 133.2, 133.0, 132.8, 132.7, 130.6, 130.4, 129.6, 129.3, 127.7, 127.5, 125.7, 125.5, 124.1, 124.0, 116.9, 116.9, 116.8, 116.7, 110.1, 109.9, 52.6, 51.3, 51.2, 49.6, 37.4, 34.5, 33.3, 33.0, 21.5, 21.4, 18.2, 18.1; HRMS (m/z, ESI-TOF): Calcd for  $C_{23}H_{25}N_2O_3^+$   $[M+H]^+$  377.1860, found 377.1868.

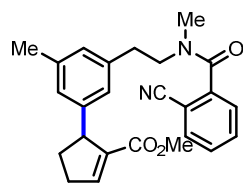

6e

**Methyl-5-(3-(2-(2-isocyano-N-methylbenzamido)ethyl)-5-methylphenyl)**

**cyclopent-1-ene-1-carboxylate:** The corresponding reaction was run with standard conditions and DMF (5 equiv) for 28 h. The two rotamers' ratio is about 50:50.  $^1H$  NMR (400 MHz,  $CDCl_3$ )  $\delta$  7.70 (d,  $J = 7.7$  Hz, 0.49H), 7.64 (t,  $J = 7.2$  Hz, 1.00H), 7.53-7.38 (m, 1.55H), 7.37 (d,  $J = 7.7$  Hz, 0.46H), 6.99 (t,  $J = 2.2$  Hz, 0.93H), 6.96 (s, 0.50H), 6.90 (s, 0.49H), 6.84 (s, 0.93H), 6.80 (d,  $J = 7.3$  Hz, 0.45H), 6.57 (s, 0.48H), 6.52 (s, 0.48H), 4.16-3.98 (m, 0.96H), 3.78 (dd,  $J = 8.8, 6.5$  Hz, 1.00H), 3.60 (s, 1.55H), 3.57 (s, 1.45H), 3.40 (t,  $J = 7.0$  Hz, 1.01H), 3.17 (s, 1.49H), 2.96 (t,  $J = 7.6$  Hz, 0.98H), 2.78 (s, 1.47H), 2.73 (t,  $J = 7.0$  Hz, 1.05H), 2.70-2.43 (m, 3.01H), 2.30 (s, 1.50H), 2.21 (s, 1.50H), 1.93-1.77 (m, 1.04H);  $^{13}C$  NMR (101 MHz,  $CDCl_3$ )  $\delta$  168.0, 167.5, 165.3, 165.2, 145.7, 145.5, 145.2, 145.1, 140.9, 140.6, 139.2, 139.0, 138.8, 138.5, 138.3, 137.7, 133.1, 133.0, 132.8, 132.6, 129.4, 129.1, 127.9, 127.8, 127.6, 127.5, 126.3, 126.0, 124.7, 116.9, 110.1, 109.8, 52.7, 51.5, 51.4, 50.1, 49.9, 49.7, 37.5, 34.5, 34.3, 34.3, 33.3, 33.0, 32.3, 32.3, 21.5, 21.4; HRMS (m/z, ESI-TOF): Calcd for  $C_{25}H_{27}N_2O_3^+$   $[M+H]^+$  403.2016, found 403.2024.

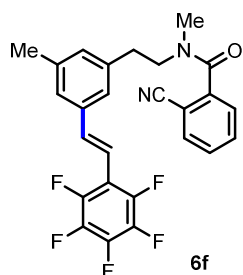

**(E)-2-cyano-N-methyl-N-(3-methyl-5-(perfluorostyryl)phenethyl)**

**benzamide:** The corresponding reaction was run with standard conditions and DMF (5 equiv) for 28 h. The two rotamers' ratio is about 55:45. <sup>1</sup>H NMR (400 MHz, CDCl<sub>3</sub>) δ 1.72 (d, *J* = 7.7 Hz, 0.56H), 7.69-7.60 (m, 1.12H), 7.55-7.36 (m, 2.69H), 7.29 (t, *J* = 9.1 Hz, 0.98H), 7.25-7.19 (m, 0.96H), 7.14 (s, 0.51H), 6.99 (d, *J* = 16.8 Hz, 0.55H), 6.89-6.80 (m, 1.29H), 6.74 (s, 0.46H), 3.82 (dd, *J* = 8.9, 6.6 Hz, 1.10H), 3.48 (t, *J* = 6.9 Hz, 0.90H), 3.22 (s, 1.39H), 3.04 (t, *J* = 7.6 Hz, 1.10H), 2.87 (s, 1.52H), 2.81 (t, *J* = 6.8 Hz, 0.93H), 2.39 (s, 1.63H), 2.32 (s, 1.33H); <sup>13</sup>C NMR (101 MHz, CDCl<sub>3</sub>, the signal of the peaks of the carbons on the pentafluoroarene are very low and not interpreted.) δ 168.0, 167.7, 140.8, 140.4, 139.5, 139.2, 139.0, 138.4, 137.4, 137.1, 136.9, 133.2, 133.1, 132.8, 132.8, 130.7, 130.5, 129.6, 129.3, 127.8, 127.5, 126.2, 126.0, 124.8, 124.6, 116.9, 116.9, 113.0, 112.7, 110.1, 110.0, 52.6, 49.7, 37.5, 34.4, 33.3, 33.0, 21.4, 21.4; HRMS (*m/z*, ESI-TOF): Calcd for C<sub>26</sub>H<sub>20</sub>F<sub>5</sub>N<sub>2</sub>O<sup>+</sup> [M+H<sup>+</sup>] 471.1490, found 471.1497.

**2.5 Sequential remote-selective *ortho*- and *meta*-C–H bond olefination and characterization of the products.**

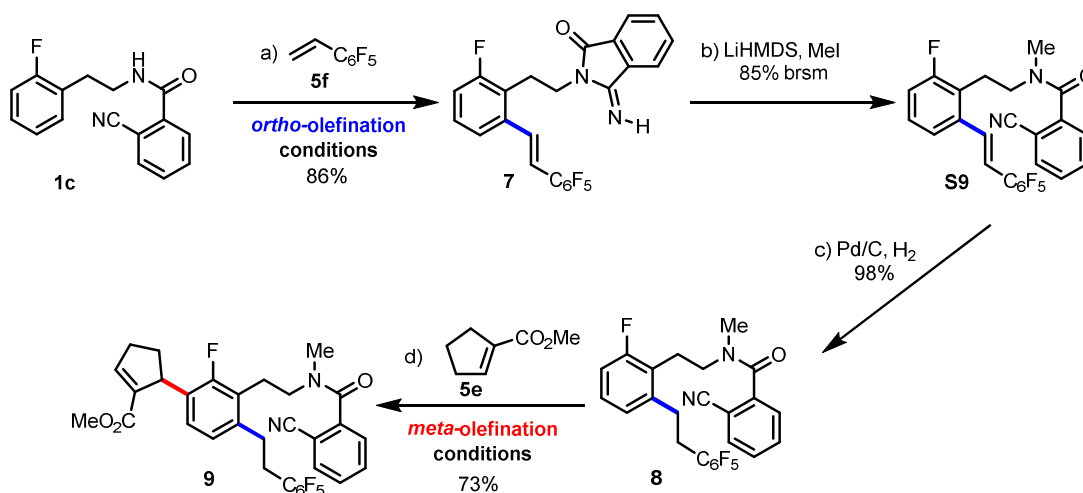

**Step a:** **7** was obtained in 86% yield using standard *ortho*-olefination conditions in 24 h.

**Step b:** LHMDS (0.6 mL, 1.0 M in THF) was added to a solution of **7** (110 mg, 0.24 mmol) in anhydrous THF (3 mL) at -15 °C. After stirring for 0.5 h, MeI (45 μL, 0.72 mmol) was added dropwise to the reaction. The reaction mixture was gradually warmed to room temperature and stirred for another 2 h. Then H<sub>2</sub>O (10 mL) was added slowly to quench the reaction. The aqueous phase was extracted with ethyl acetate (10 mL × 3). The combined organic phase was dried over anhydrous Na<sub>2</sub>SO<sub>4</sub> and concentrated under reduced pressure. The residue was purified by flash silica gel chromatography with petroleum ether/EtOAc (2:1) to afford compound **S9** (66 mg) in 58% yield, and 32% of substrate **7** (35 mg) was also recovered.



**Step c:** To a solution of compound **S9** (56 mg, 0.12 mmol) in methanol (5 mL) was added Palladium on carbon (10% w/w, 15 mg). The reaction was then stirred at room temperature under hydrogen gas atmosphere (1 atm) for 1 hour. The catalyst was filtered through a short pad of Celite, and the filtrate was concentrated under reduced pressure. The residue was purified by flash silica gel chromatography with petroleum ether/EtOAc (2:1) to obtain compound **8** (56 mg) in 98% yield.

**Step d:** **9** was obtained in 73% yield using standard *meta*-olefination conditions at 90 °C in 48 h.

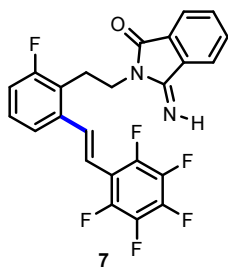

**(E)-2-(2-fluoro-6-(perfluorostyryl)phenethyl)-3-iminoisoindolin-1-one:**  $^1\text{H}$  NMR (400 MHz,  $\text{CDCl}_3$ )  $\delta$  8.53 (brs, 1H), 7.72-7.50 (m, 5H), 7.32-7.20 (m, 2H), 7.05 (t,  $J = 8.8$  Hz, 1H), 6.61 (d,  $J = 16.5$  Hz, 1H), 4.05 (t,  $J = 6.8$  Hz, 2H), 3.21 (t,  $J = 6.0$  Hz, 2H);  $^{13}\text{C}$  NMR (101 MHz,  $\text{CDCl}_3$ )  $\delta$  167.6, 161.8 (d,  $J = 245$  Hz), 146.1 (m), 143.6 (m), 138.75 (d,  $J = 4.5$  Hz), 133.8, 132.8, 132.1, 131.0, 128.4 (d,  $J = 9$  Hz), 124.8 (d,  $J = 15$  Hz), 123.1, 121.7, 120.6 (m), 115.7, 115.5 (d,  $J = 23$  Hz), 112.0 (m), 38.1, 24.2 (d,  $J = 4$  Hz).

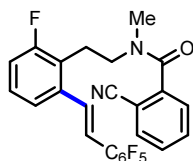

**S9**

**(E)-2-cyano-N-(2-fluoro-6-(perfluorostyryl)phenethyl)-N-methylbenzamide:**

The two rotamers' ratio is about 50:50.  $^1\text{H}$  NMR (400 MHz,  $\text{CDCl}_3$ )  $\delta$  7.84 (d,  $J = 16.5$  Hz, 0.48H), 7.69 (d,  $J = 7.7$  Hz, 0.47H), 7.64 (t,  $J = 7.7$  Hz, 0.51H), 7.58 (d,  $J = 7.6$  Hz, 0.51H), 7.54-7.36 (m, 2.71H), 7.36-7.23 (m, 1.94H), 7.07 (t,  $J = 8.9$  Hz, 0.49H), 7.02-6.90 (m, 1.47H), 6.67 (d,  $J = 16.5$  Hz, 0.50H), 3.83-3.70 (m, 0.95H), 3.43 (t,  $J = 7.0$  Hz, 1.02H), 3.32-3.16 (m, 2.49H), 3.01 (t,  $J = 6.9$  Hz, 1.02H), 2.93 (s, 1.40H); HRMS ( $m/z$ , ESI-TOF): Calcd for  $\text{C}_{25}\text{H}_{17}\text{F}_6\text{N}_2\text{O}^+$  [ $\text{M}+\text{H}^+$ ] 475.1240, found 475.1247.

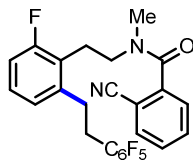

**8**

**2-Cyano-N-(2-fluoro-6-(perfluorophenethyl)phenethyl)-N-methylbenzamide:**

The two rotamers' ratio is about 57:43.  $^1\text{H}$  NMR (400 MHz,  $\text{CDCl}_3$ )  $\delta$  7.71 (d,  $J = 7.7$  Hz, 0.57H), 7.70-7.61 (m, 1.00H), 7.56-7.41 (m, 2.03H), 7.18-7.10 (m, 1.02H), 7.07 (d,  $J = 7.5$  Hz, 0.43H), 6.94 (t,  $J = 9.0$  Hz, 0.59H), 6.85 (q,  $J = 7.7$  Hz, 1.42H), 3.80-3.66 (m, 1.14H), 3.40 (t,  $J = 7.4$  Hz, 0.85H), 3.26 (s, 1.29H), 3.18-3.00 (m, 3.51H), 2.98 (s, 1.69H), 2.92 (t,  $J = 7.1$  Hz, 0.89H), 2.79 (dd,  $J = 9.6, 6.7$  Hz, 0.86H), 2.61 (dd,  $J = 9.9, 6.3$  Hz, 0.84H);  $^{13}\text{C}$  NMR (101 MHz,  $\text{CDCl}_3$ )  $\delta$  167.9, 167.7, 161.9 (d,  $J_{\text{C-F}} = 244$  Hz), 161.8 (d,  $J_{\text{C-F}} = 246$  Hz), 146.5 (m), 143.9 (m), 141.5, 141.5, 140.6, 140.6, 140.3, 138.8 (m), 136.5 (m), 133.1 (d,  $J_{\text{C-F}} = 27$  Hz), 132.9 (d,  $J_{\text{C-F}} =$

9 Hz), 129.6, 129.4, 128.5 (d,  $J_{C-F}$  = 10 Hz), 128.0 (d,  $J_{C-F}$  = 9 Hz), 127.5, 127.5, 125.4 (d,  $J_{C-F}$  = 3 Hz), 125.2 (d,  $J_{C-F}$  = 3 Hz), 124.0 (d,  $J_{C-F}$  = 15 Hz), 123.0 (d,  $J_{C-F}$  = 15 Hz), 116.8, 114.0 (d,  $J_{C-F}$  = 23 Hz), 113.7 (d,  $J_{C-F}$  = 23 Hz), 110.1, 50.8, 47.9, 37.1, 33.2, 32.2, 31.9, 24.4 (d,  $J_{C-F}$  = 2 Hz), 24.2, 24.0, 23.1 (d,  $J_{C-F}$  = 3 Hz); HRMS (m/z, ESI-TOF): Calcd for  $C_{25}H_{19}F_6N_2O^+$  [M+H<sup>+</sup>] 477.1396, found 477.1403.

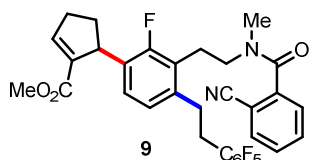

**Methyl-5-(3-(2-(2-cyano-*N*-methylbenzamido)ethyl)-2-fluoro-4-(perfluorophenethyl)phenyl)cyclopent-1-enecarboxylate:**

The two rotamers' ratio is about 57:43. <sup>1</sup>H NMR (400 MHz, CDCl<sub>3</sub>) δ 7.71 (d,  $J$  = 7.7 Hz, 0.57H), 7.69-7.61 (m, 0.99H), 7.55-7.39 (m, 2.01H), 7.07 (d,  $J$  = 7.6 Hz, 0.44H), 7.03 (t,  $J$  = 2.2 Hz, 1.00H), 6.84 (td,  $J$  = 7.8, 3.2 Hz, 0.99H), 6.80-6.69 (m, 0.97H), 4.48-4.38 (m, 0.53H), 4.37-4.27 (m, 0.42H), 3.82-3.68 (m, 1.17H), 3.61 (s, 3.00H), 3.39 (t,  $J$  = 7.4 Hz, 0.94H), 3.26 (s, 1.30H), 3.13 (t,  $J$  = 7.5 Hz, 1.08H), 3.01 (s, 2.08 H), 2.97 (s, 1.70H), 2.91 (t,  $J$  = 7.0 Hz, 0.92H), 2.74 (t,  $J$  = 8.1 Hz, 0.96H), 2.69-2.42 (m, 3.90H), 1.92-1.72 (m, 1.30H); <sup>13</sup>C NMR (101 MHz, CDCl<sub>3</sub>) δ 167.9, 167.7, 165.1, 165.0, 159.5 (d,  $J_{C-F}$  = 245 Hz), 146.2, 145.9, 143.9 (m), 140.7, 140.5, 139.0 (d,  $J_{C-F}$  = 4 Hz), 138.7 (m), 138.2 (d,  $J_{C-F}$  = 4 Hz), 137.8, 137.4, 136.3 (m), 133.2, 133.0, 132.8, 130.3 (d,  $J_{C-F}$  = 36 Hz), 130.1 (d,  $J_{C-F}$  = 36 Hz), 129.6, 129.3, 127.6, 126.7 (d,  $J_{C-F}$  = 6 Hz), 126.1 (d,  $J_{C-F}$  = 6 Hz), 125.0 (d,  $J_{C-F}$  = 3 Hz), 124.7 (d,  $J_{C-F}$  = 3 Hz), 123.9 (d,  $J_{C-F}$  = 17 Hz), 122.8 (d,  $J_{C-F}$  = 16 Hz), 116.9, 116.8, 114.2 (m), 110.1, 110.0, 77.5, 77.2, 76.8, 51.5, 51.5, 50.9, 48.0, 43.0 (d,  $J_{C-F}$  = 2 Hz), 37.2, 33.2, 33.0, 32.9, 32.2, 32.2, 32.1, 31.7, 24.6 (d,  $J_{C-F}$  = 3 Hz), 24.2, 23.8, 23.4 (d,  $J_{C-F}$  = 4 Hz); HRMS (m/z, ESI-TOF): Calcd for  $C_{32}H_{27}F_6N_2O_3^+$  [M+H<sup>+</sup>] 601.1920, found 601.1927.

**2.6 Removal of the directing group and characterization of selected hydrolyzed products.**

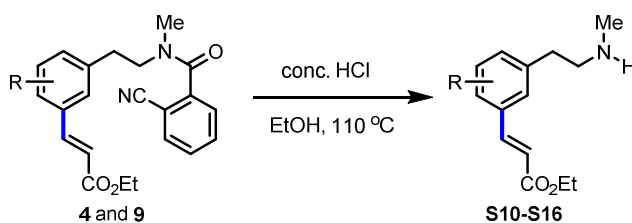

To a solution of **4** (0.1 mmol) in EtOH (1 mL) was added HCl (aqueous solution, 1 mL, 36 wt%) dropwise at 0 °C. After stirring for 10 min at 0 °C, the reaction mixture was allowed to reflux at 110 °C under nitrogen atmosphere. After the reaction was completed, the reaction mixture was diluted with 5 mL of water. After basification with ammonium hydroxide solution at 0 °C under inert atmosphere until pH value reached about 10, the solution was extracted with EtOAc (20 mL × 2). The combined organic phase was washed with brine, dried over Na<sub>2</sub>SO<sub>4</sub> and concentrated *in vacuo*. The crude mixture was purified by preparative thin layer chromatography using EtOAc/Et<sub>3</sub>N (50/1) as the eluent to yield the product in 70% to 90% yield.

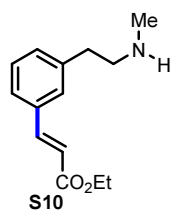

**S10 Ethyl-(*E*)-3-(3-(2-(methylamino)ethyl)phenyl)acrylate:**  $^1\text{H}$  NMR (400 MHz,  $\text{CDCl}_3$ )  $\delta$  7.63 (d,  $J = 16.0$  Hz, 1H), 7.43-7.35 (m, 2H), 7.31 (td,  $J = 7.4, 1.1$  Hz, 1H), 7.24 (dt,  $J = 7.5, 1.5$  Hz, 1H), 6.42 (d,  $J = 16.0$  Hz, 1H), 5.63 (brs, 1H), 4.25 (q,  $J = 7.1$  Hz, 2H), 3.02 (s, 4H), 2.58 (s, 3H), 1.32 (t,  $J = 7.1$  Hz, 3H).

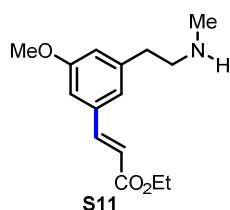

**S11 Ethyl-(*E*)-3-(3-methoxy-5-(2-(methylamino)ethyl)phenyl)acrylate:** Note: one drop of  $\text{D}_2\text{O}$  was added to the sample solution to suppress the NH peak in the NMR spectrum.  $^1\text{H}$  NMR (400 MHz,  $\text{CDCl}_3$ )  $\delta$  7.59 (d,  $J = 16.1$  Hz, 1H), 6.98 (s, 1H), 6.90 (t,  $J = 1.7$  Hz, 1H), 6.80 (s, 1H), 6.40 (d,  $J = 16.0$  Hz, 1H), 4.25 (q,  $J = 7.1$  Hz, 2H), 3.80 (s, 3H), 2.99 (s, 4H), 2.56 (s, 3H), 1.32 (t,  $J = 7.1$  Hz, 3H).

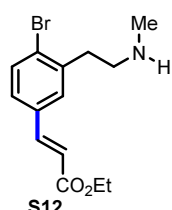

**S12 Ethyl-(*E*)-3-(4-bromo-3-(2-(methylamino)ethyl)phenyl)acrylate:**  $^1\text{H}$  NMR (400 MHz,  $\text{CDCl}_3$ )  $\delta$  7.58 (d,  $J = 16.4$  Hz, 1H), 7.55 (d,  $J = 8.6$  Hz, 1H), 7.43 (d,  $J = 2.2$  Hz, 1H), 7.26-7.22 (m, 1H), 6.43 (d,  $J = 16.0$  Hz, 1H), 4.25 (q,  $J = 7.1$  Hz, 2H), 3.78 (brs, 1H), 3.11 (dd,  $J = 8.7, 6.3$  Hz, 2H), 2.99 (dd,  $J = 9.1, 6.2$  Hz, 2H), 2.59 (s, 3H), 1.33 (t,  $J = 7.1$  Hz, 3H).

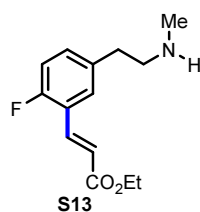

**S13 Ethyl-(*E*)-3-(2-fluoro-5-(2-(methylamino)ethyl)phenyl)acrylate:**  $^1\text{H}$  NMR (400 MHz,  $\text{CDCl}_3$ )  $\delta$  7.74 (d,  $J = 16.2$  Hz, 1H), 7.38 (dd,  $J_{F-H} = 6.9, J_{H-H} = 2.3$  Hz, 1H), 7.20 (ddd,  $J_{F-H} = 4.9, J_{H-H} = 8.4, 2.3$  Hz, 1H), 7.02 (dd,  $J_{F-H} = 10.4, J_{H-H} = 8.4$  Hz, 1H), 6.52 (d,  $J = 16.2$  Hz, 1H), 5.07 (s, 3H), 4.25 (q,  $J = 7.1$  Hz, 2H), 2.98 (s, 4H), 2.57 (s, 3H), 1.32 (t,  $J = 7.1$  Hz, 3H).

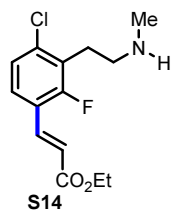

S14

**Ethyl-(*E*)-3-(4-chloro-2-fluoro-3-(2-(methylamino)ethyl)phenyl)acrylate:**  $^1\text{H}$  NMR (400 MHz,  $\text{CDCl}_3$ )  $\delta$  7.75 (d,  $J = 16.2$  Hz, 1H), 7.34 (t,  $J_{F-H}$  and  $H-H = 8.1$  Hz, 1H), 7.18 (dd,  $J_{H-H} = 8.4$ ,  $J_{F-H} = 1.2$  Hz, 1H), 6.49 (d,  $J = 16.2$  Hz, 1H), 4.26 (q,  $J = 7.1$  Hz, 2H), 3.05 (td,  $J_{H-H} = 7.5$ ,  $J_{F-H} = 2.3$  Hz, 2H), 2.86 (dd,  $J = 8.4$ , 6.6 Hz, 2H), 2.53 (brs, 1H), 2.51 (s, 3H), 1.33 (t,  $J = 7.1$  Hz, 3H).

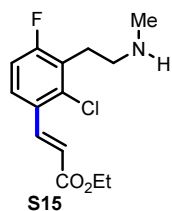

S15

**Ethyl-(*E*)-3-(2-chloro-4-fluoro-3-(2-(methylamino)ethyl)phenyl)acrylate:**  $^1\text{H}$  NMR (400 MHz,  $\text{CDCl}_3$ )  $\delta$  8.05 (d,  $J = 15.9$  Hz, 1H), 7.50 (dd,  $J_{H-H} = 8.8$ ,  $J_{F-H} = 5.9$  Hz, 1H), 7.01 (t,  $J_{F-H}$  and  $H-H = 8.7$  Hz, 1H), 6.33 (d,  $J = 15.9$  Hz, 1H), 4.27 (q,  $J = 7.2$  Hz, 2H), 3.72 (s, 1H), 3.14 (td,  $J_{H-H} = 8.2$ ,  $J_{F-H} = 2.0$  Hz, 2H), 2.92 (dd,  $J = 8.7$ , 6.6 Hz, 2H), 2.56 (s, 3H), 1.34 (t,  $J = 7.1$  Hz, 3H).

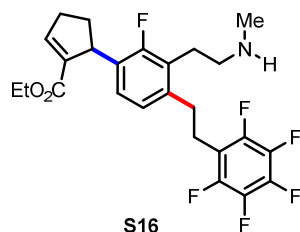

S16

**Ethyl-5-(2-fluoro-3-(2-(methylamino)ethyl)-4-(perfluorophenethyl)phenyl)cyclopent-1-enecarboxylate:**  $^1\text{H}$  NMR (400 MHz,  $\text{CDCl}_3$ )  $\delta$  7.01 (s, 1H), 6.84 (t,  $J_{F-H}$  and  $H-H = 7.7$  Hz, 1H), 6.78 (d,  $J = 8.0$  Hz, 1H), 4.41 (d,  $J = 8.4$  Hz, 1H), 4.14-3.99 (m, 2H), 3.01-2.78 (m, 8H), 2.71 – 2.43 (m, 8H), 1.14 (t,  $J = 7.1$  Hz, 3H).

## 2.7 Hydrolysis of compound $4a_{\text{mono}}$ to S17.

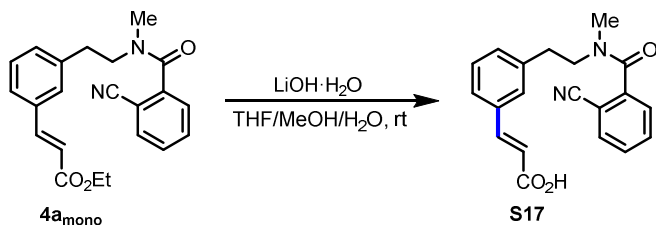

$4a_{\text{mono}}$

S17

Compound  $4a_{\text{mono}}$  (22 mg, 0.06 mmol) was dissolved in a solution of THF (1.5 mL), MeOH (1.0 mL) and  $\text{H}_2\text{O}$  (0.5 mL). The solution was cooled to 0 °C and  $\text{LiOH}\cdot\text{H}_2\text{O}$  (10 mg, 0.24 mmol) was added. The mixture was stirred at room temperature for 2 h and then  $\text{H}_2\text{O}$  (10 mL) was

added. The solution was extracted with Et<sub>2</sub>O (5 mL × 2) and the aqueous phase was acidized with 1N HCl (1 mL). The aqueous phase was extracted with CH<sub>2</sub>Cl<sub>2</sub> (5 mL × 4). The combined organic phase was dried over anhydrous Na<sub>2</sub>SO<sub>4</sub> and concentrated under reduced pressure to give compound **S17** (17 mg) in 85% yield. **S17**: <sup>1</sup>H NMR (400 MHz, CDCl<sub>3</sub>) δ 7.78 (d, *J* = 16.0 Hz, 0.63H), 7.74-7.59 (m, 2.09H), 7.56-7.28 (m, 5.50H), 7.12-6.95 (m, 0.88H), 6.89-6.77 (m, 0.42H), 6.49 (d, *J* = 15.9 Hz, 0.56H), 6.35 (d, *J* = 15.9 Hz, 0.42H), 3.83 (t, *J* = 7.4 Hz, 1.14H), 3.48 (t, *J* = 6.5 Hz, 0.86H), 3.22 (s, 1.36H), 3.08 (t, *J* = 7.3 Hz, 1.26H), 2.89-2.79 (m, 2.61H); <sup>13</sup>C NMR (101 MHz, CDCl<sub>3</sub>) δ 171.3, 171.1, 168.1, 167.8, 146.9, 146.3, 140.6, 140.2, 139.7, 138.6, 134.8, 134.6, 133.3, 133.1, 133.0, 132.8, 131.5, 131.3, 129.65, 129.62, 129.5, 129.4, 129.0, 128.7, 127.7, 127.5, 127.0, 126.8, 117.9, 117.6, 116.9, 116.9, 110.1, 109.9, 52.5, 49.5, 37.5, 34.4, 33.3, 33.1.

## 2.8 Reference.

<sup>S1</sup> 2-Cyanobenzoic acid was synthesized in large scale as reported: Goossen, L. J.; Melzer, B. *J. Org. Chem.* **2007**, *72*, 7473. 2-Cyanobenzoic acid could be stored as a solid at -18 °C for a few months.

<sup>S2</sup> Karla, R.; Ebert, B.; Thorkildsen, C.; Herdeis, C.; Johansen, T. N.; Nielsen, B.; Krogsgaard-Larsen, P. *J. Med. Chem.* **1999**, *42*, 2053.

### 3. NMR Spectra of New Compounds

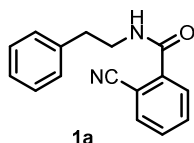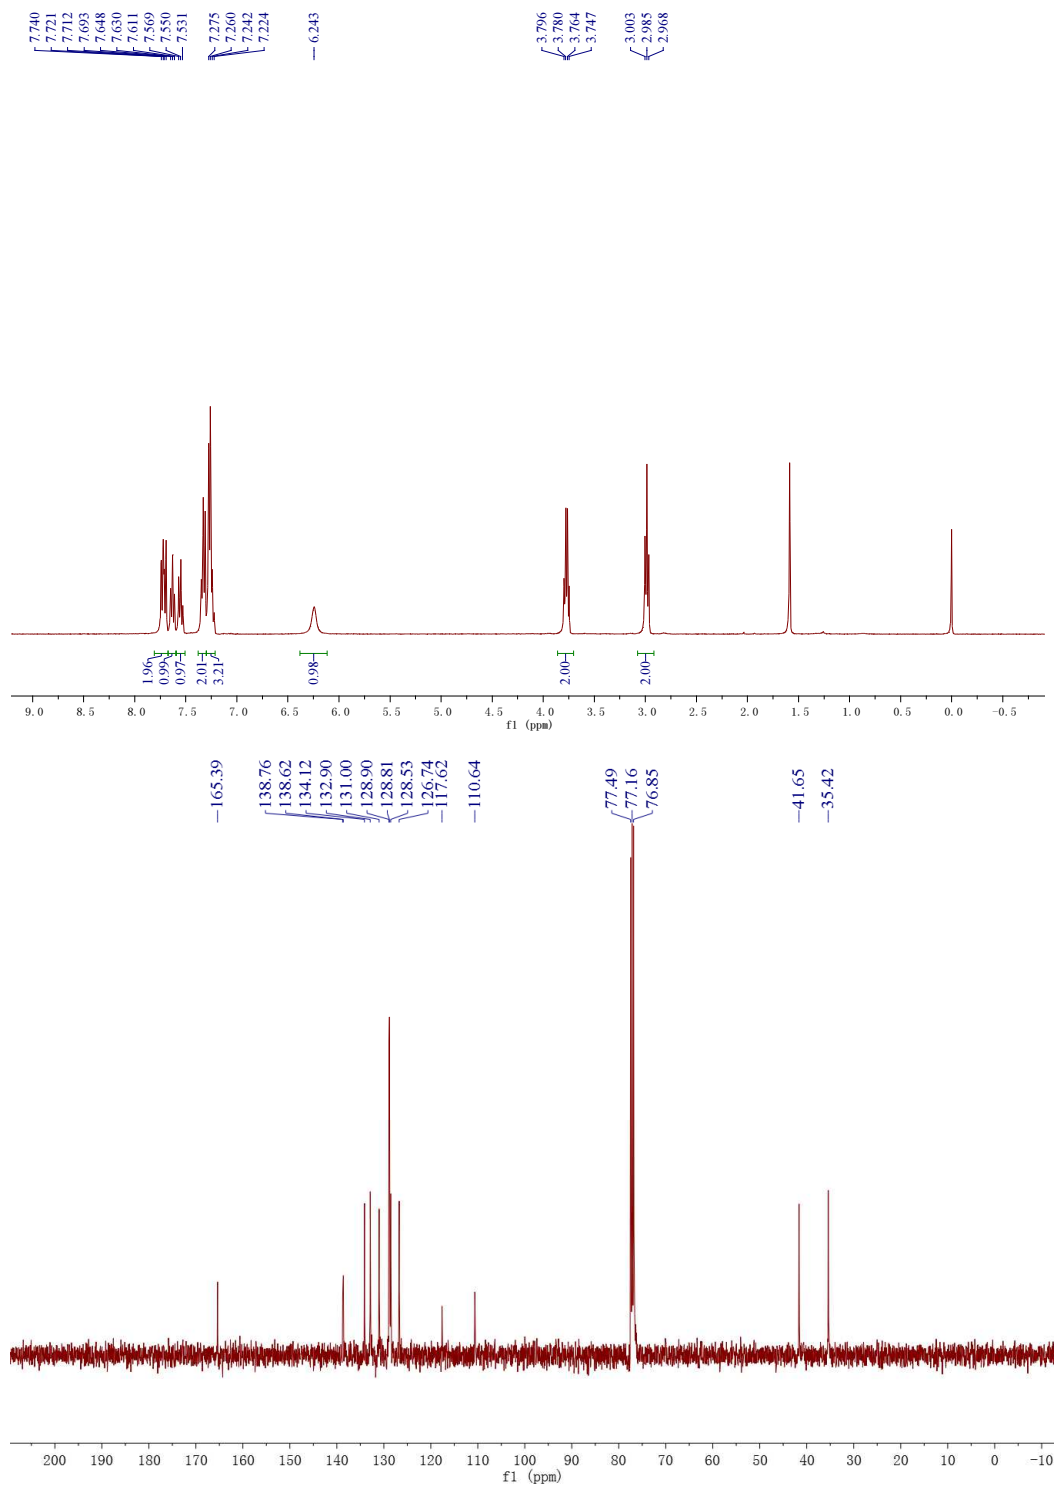

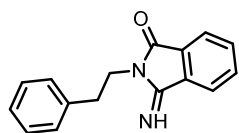

1a'

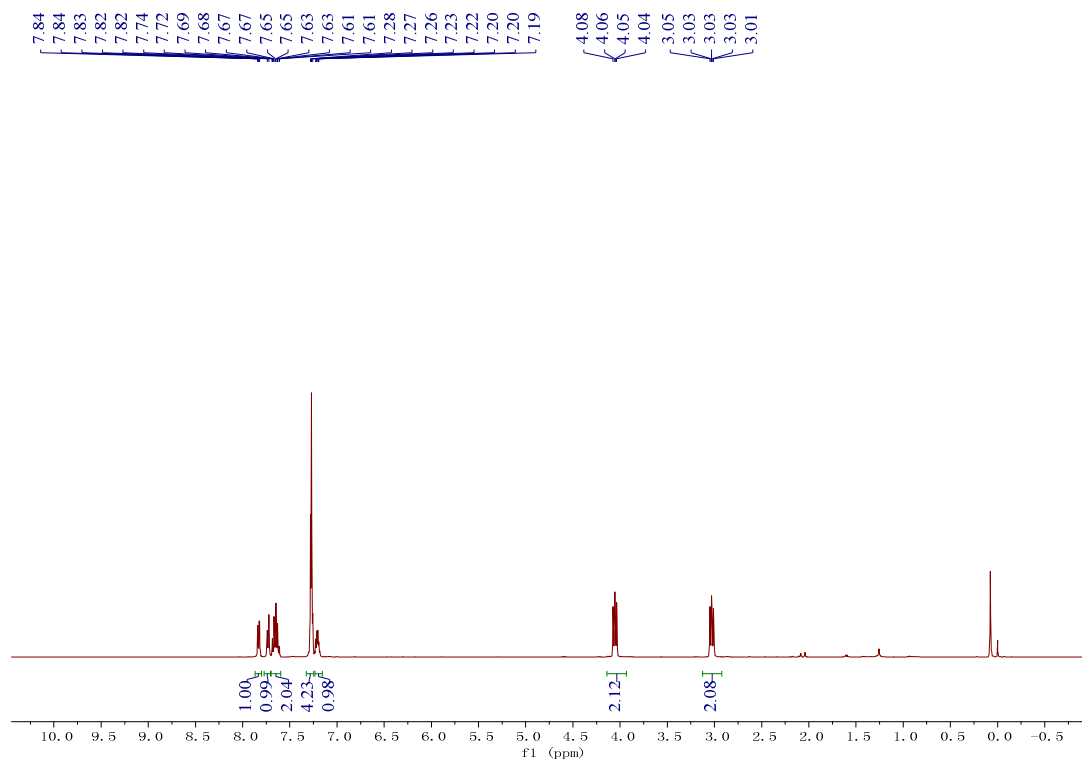

jhf-3-9-c

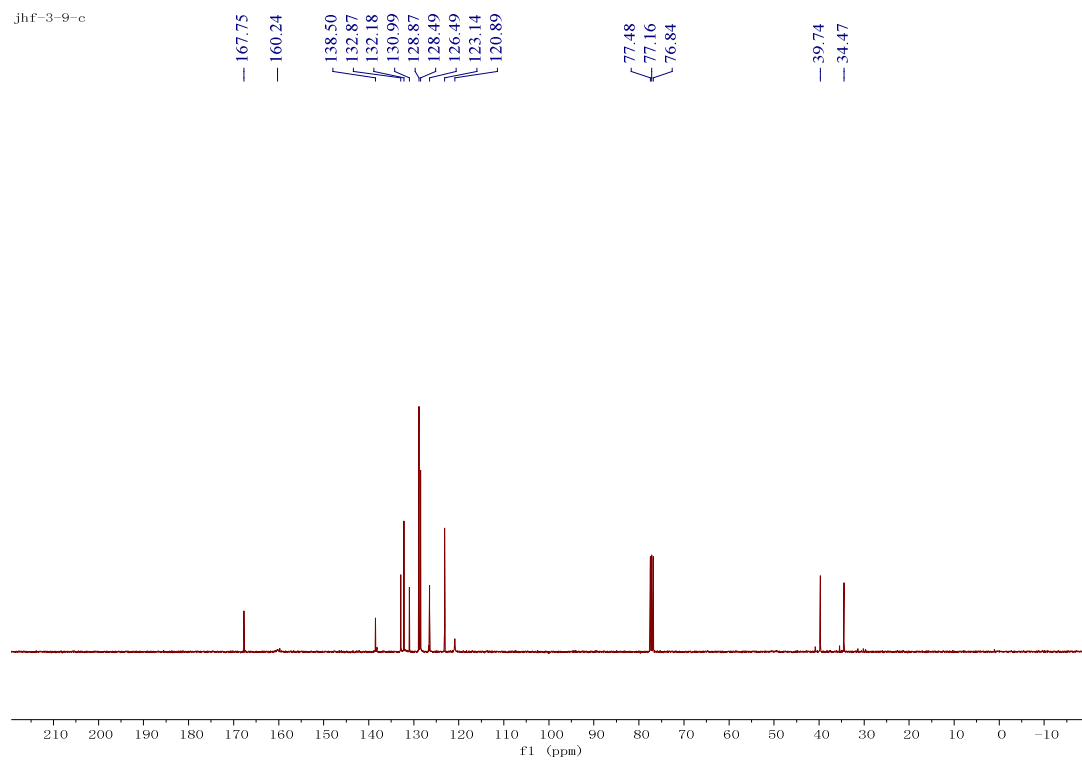

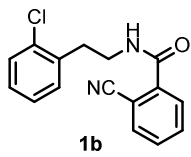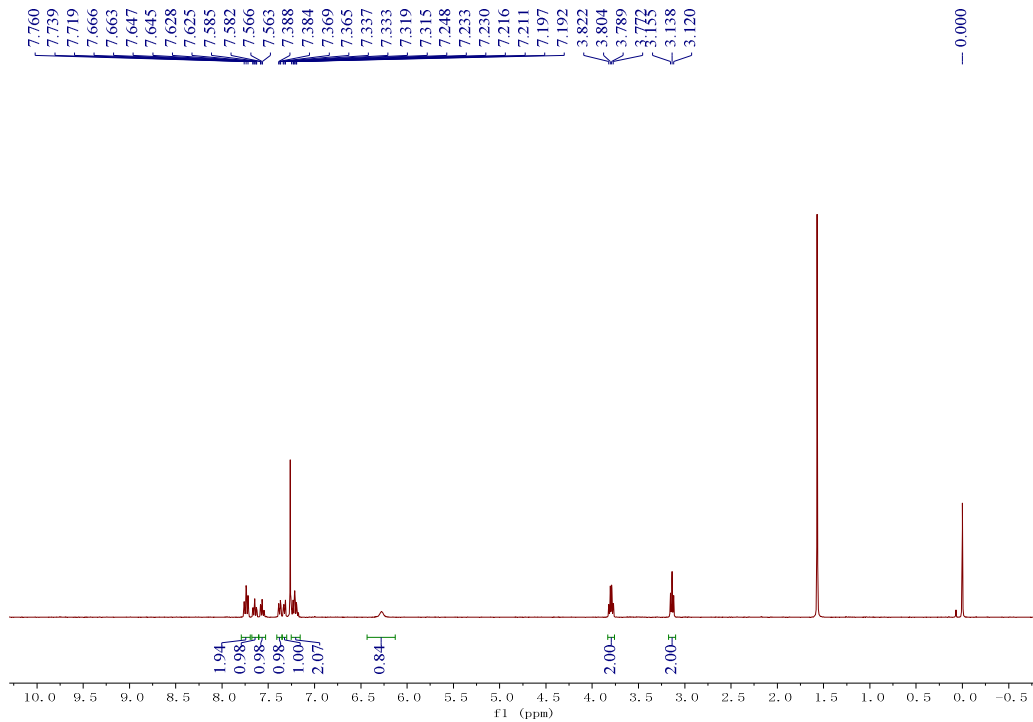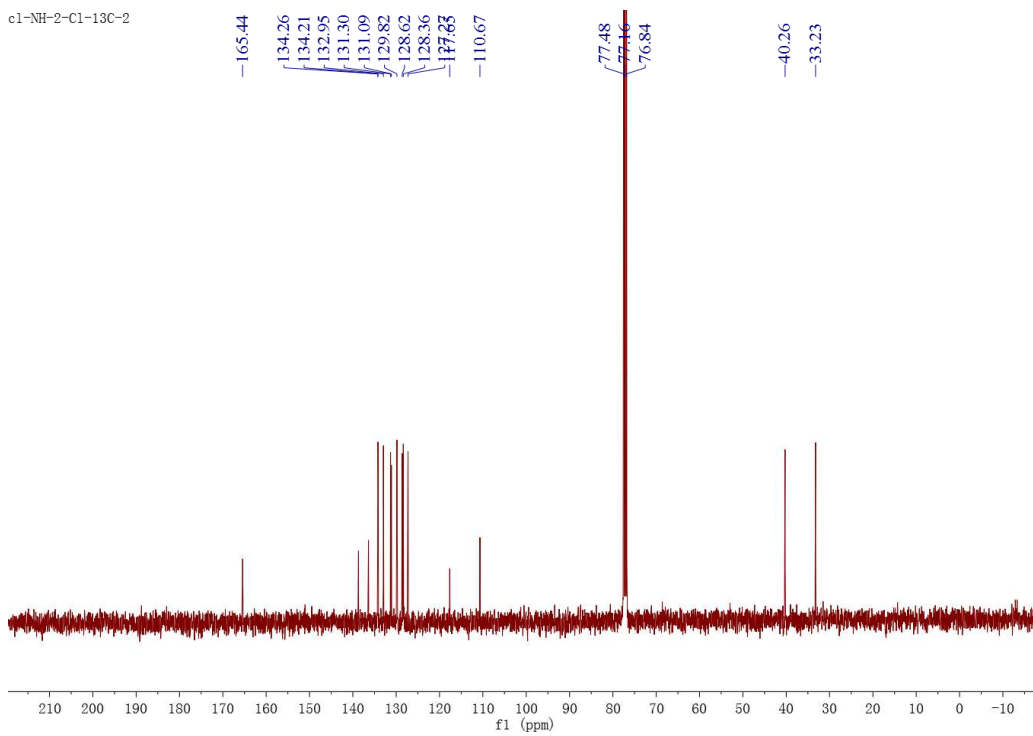



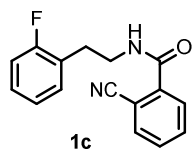

7.684  
7.644  
7.625  
7.605  
7.564  
7.545  
7.527  
7.250  
7.195  
7.072  
7.010  
6.457

3.764  
3.747  
3.731  
3.714  
3.034  
3.017  
2.999

-0.000

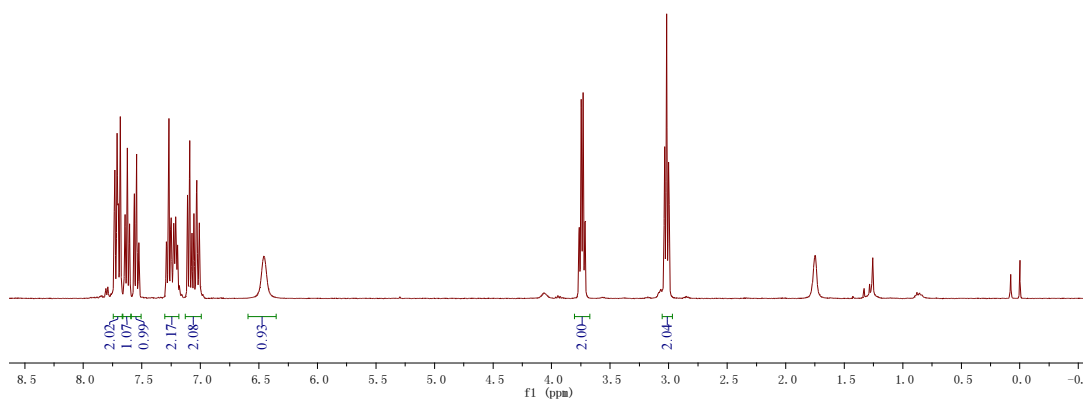

1sd-3-11a-pure

165.44  
162.63  
160.20  
138.71  
134.17  
132.92  
131.40  
131.35  
131.04  
128.66  
128.58  
128.52  
125.69  
125.53  
124.48  
124.44  
117.60  
115.63  
115.41  
110.68  
77.48  
77.16  
76.84  
40.58  
29.09

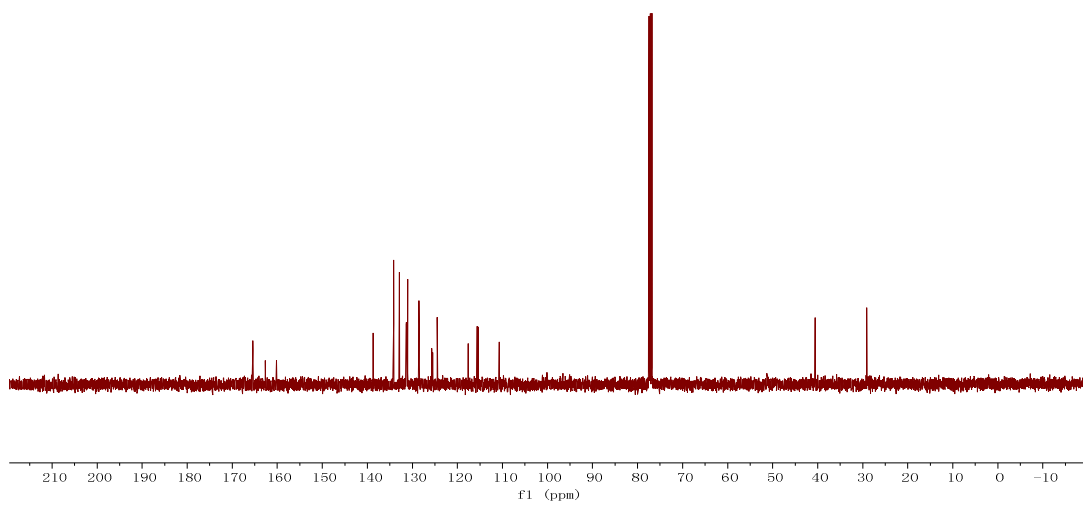

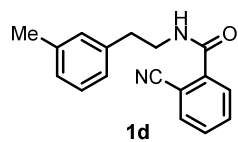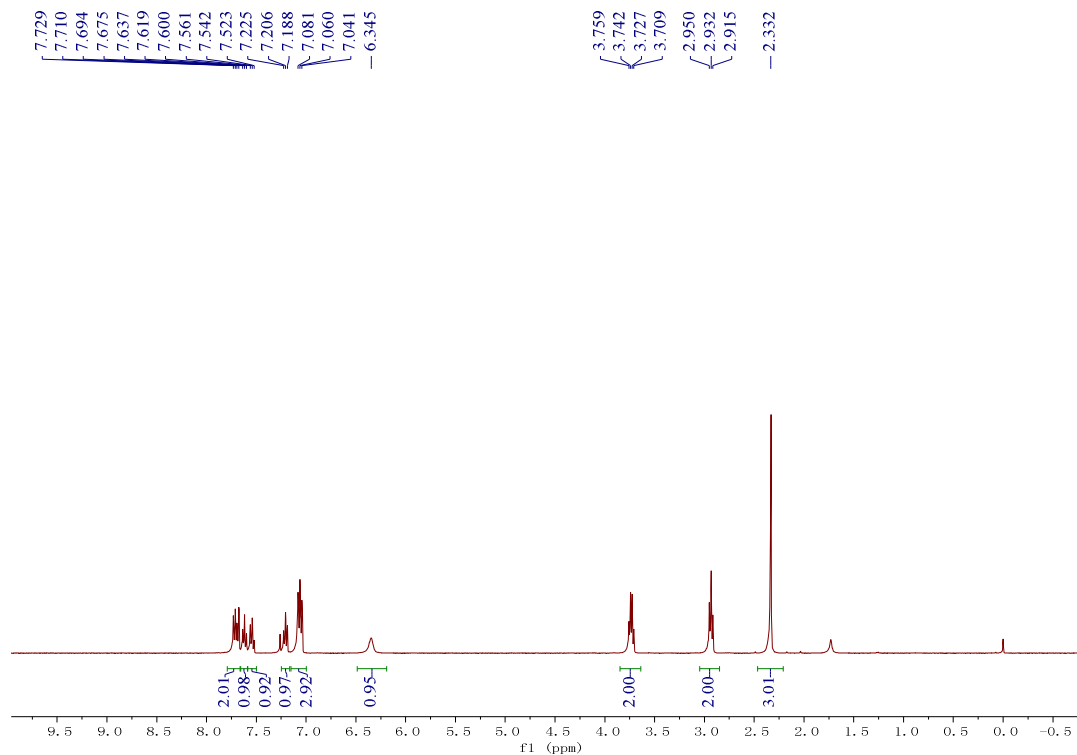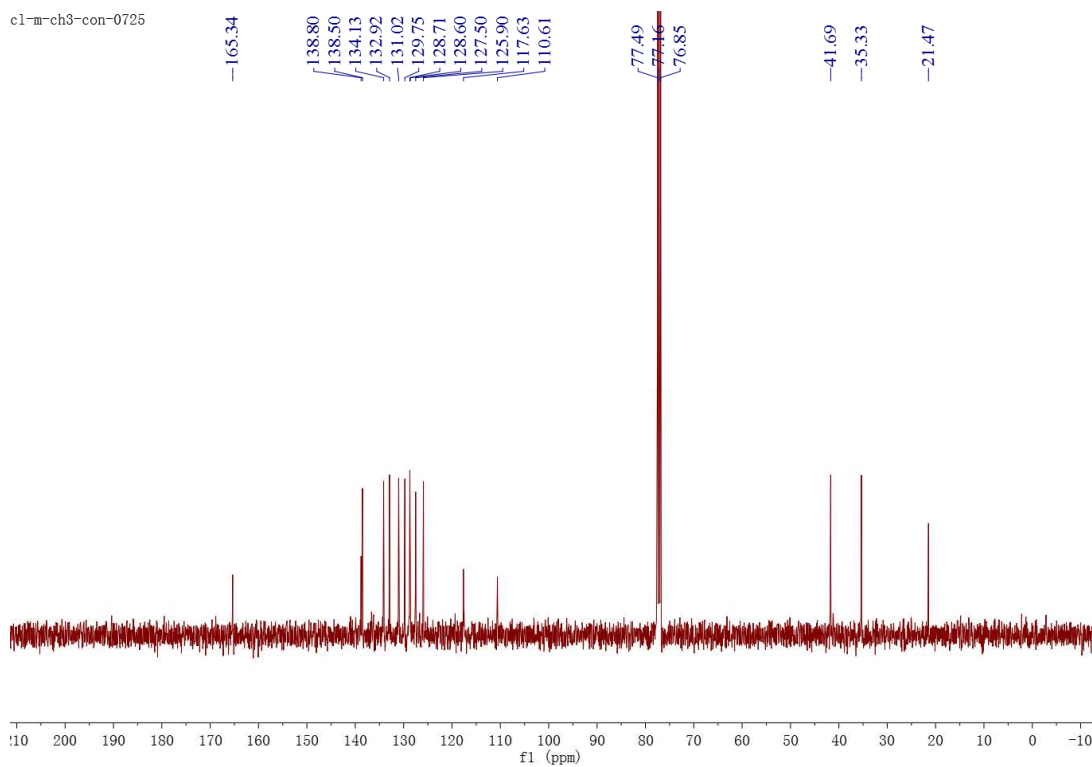

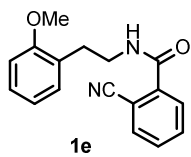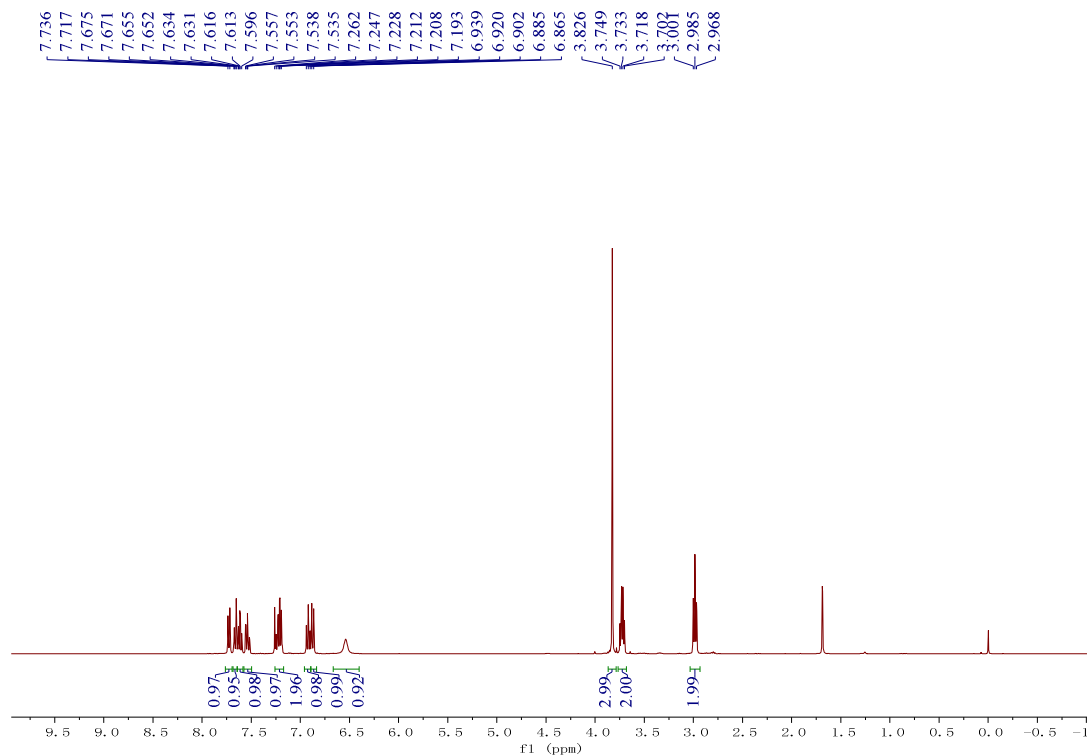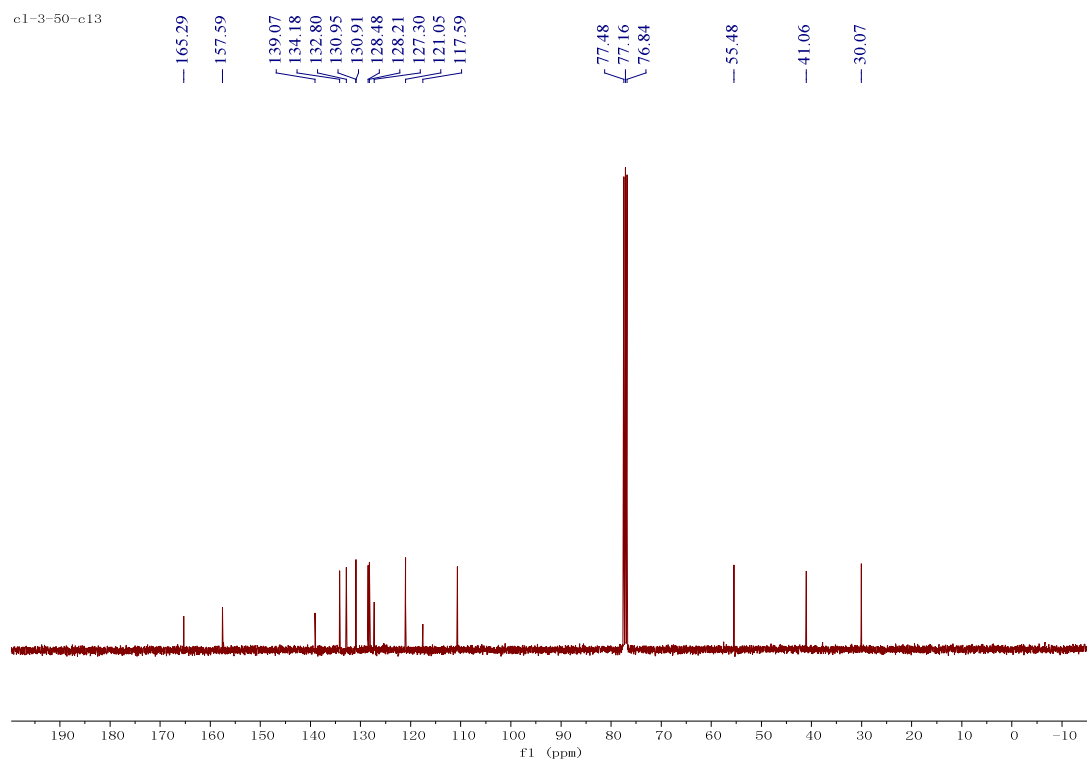

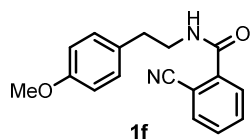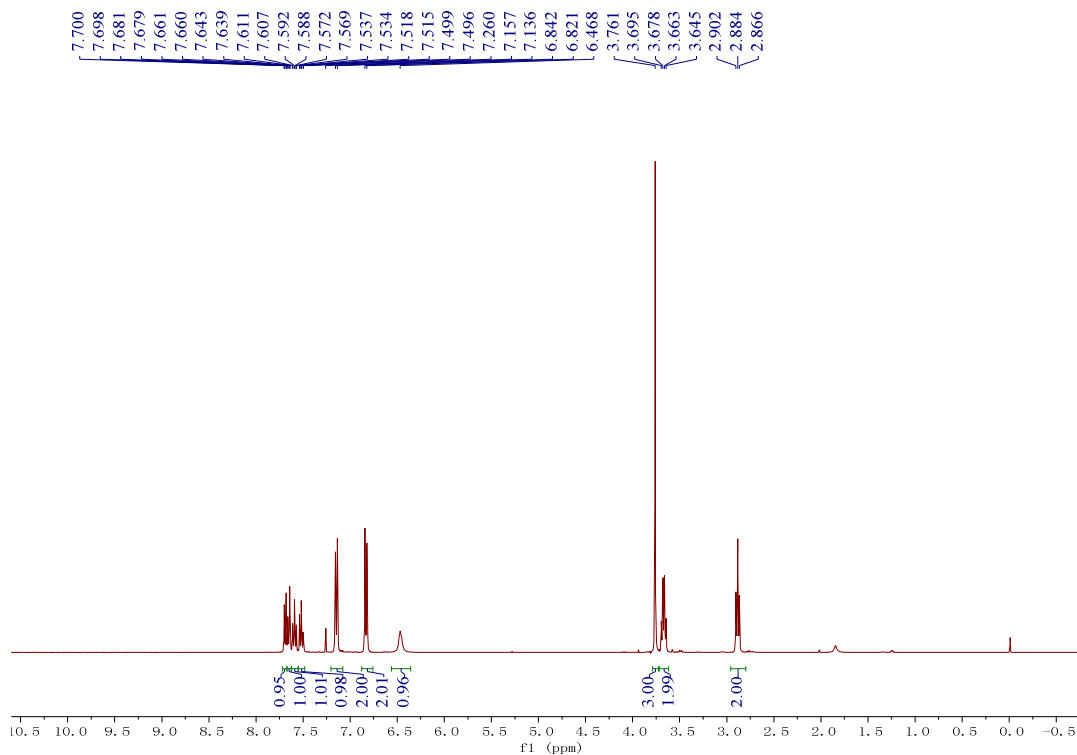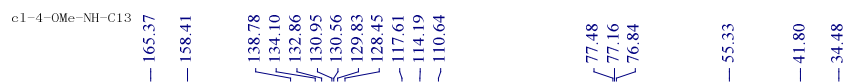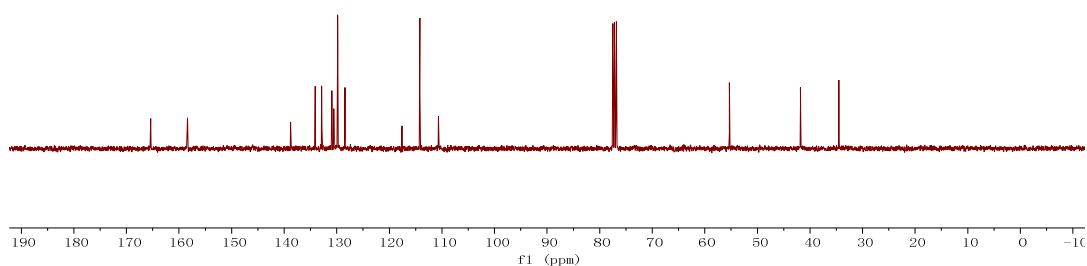

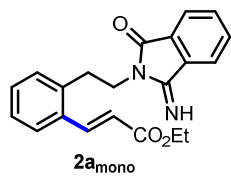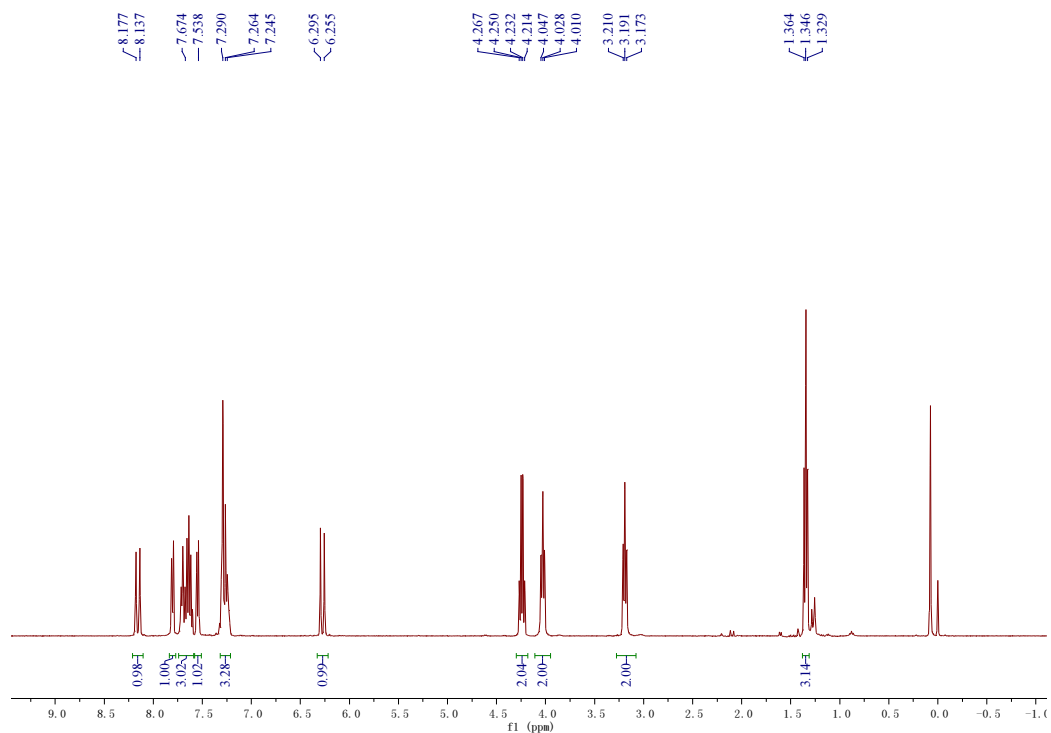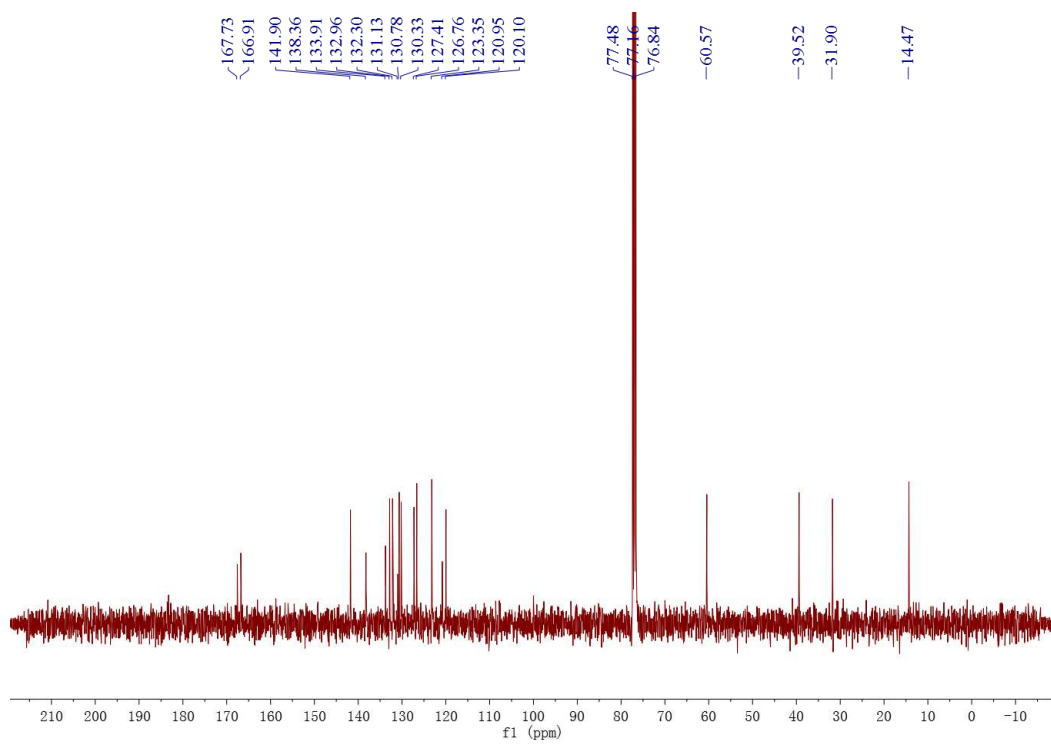

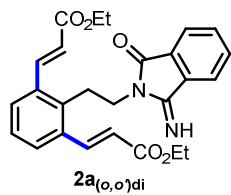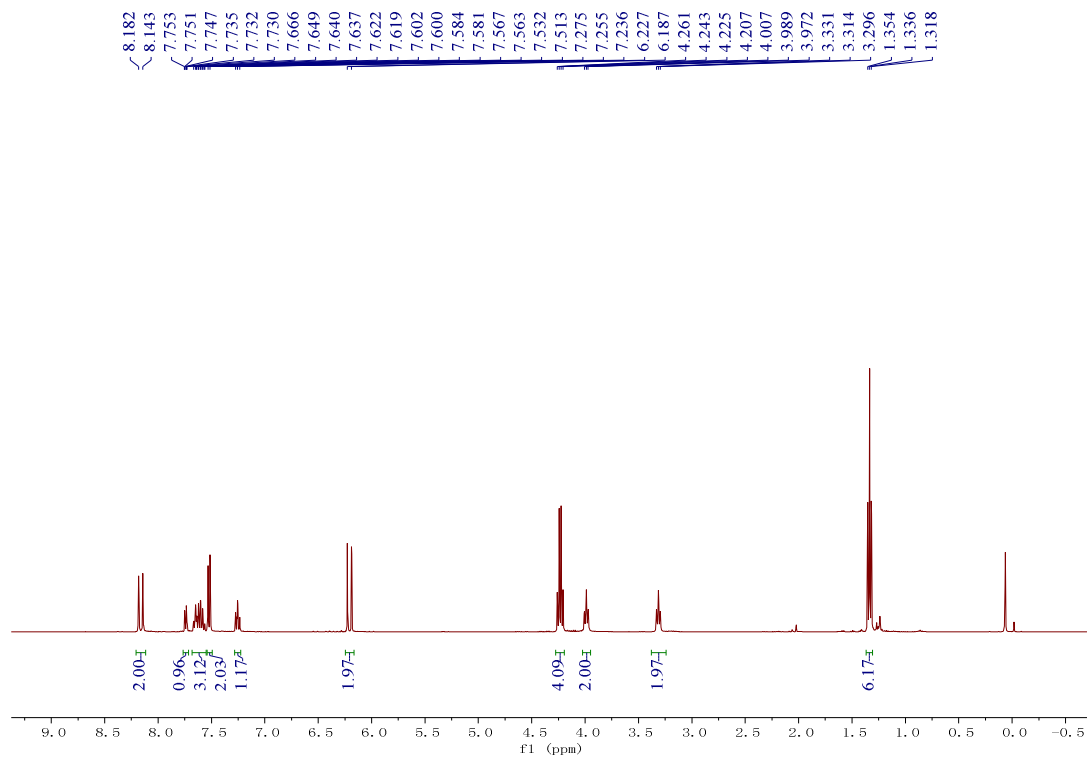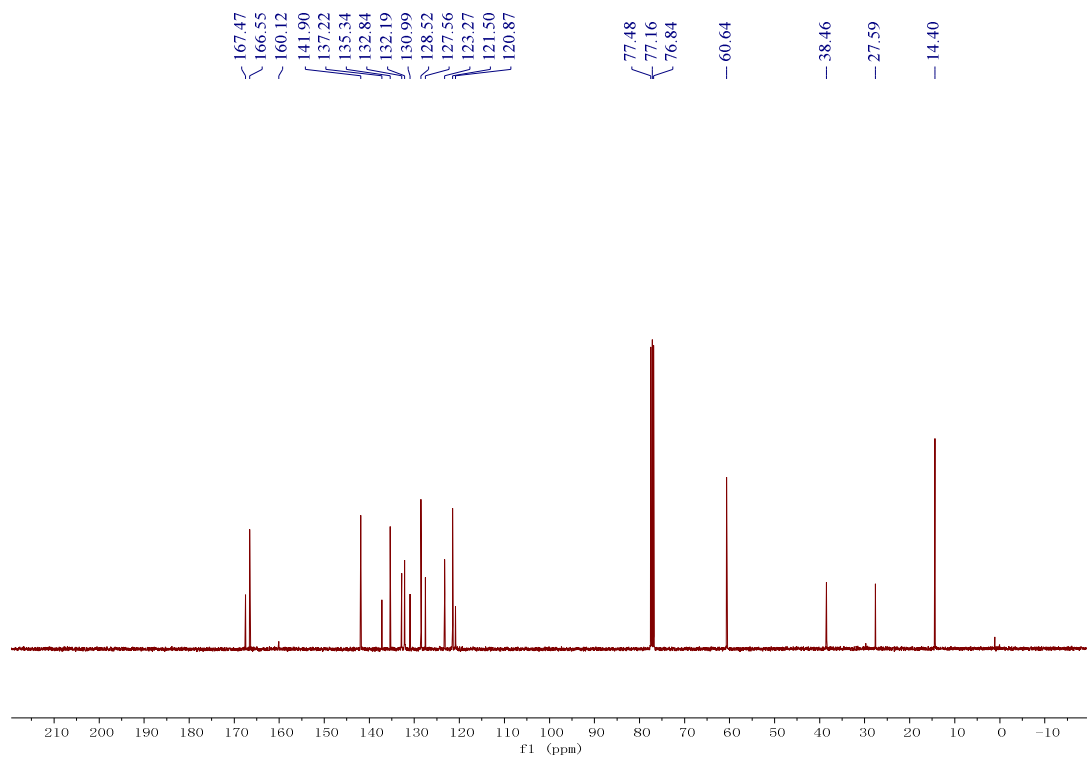

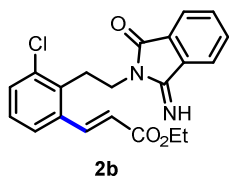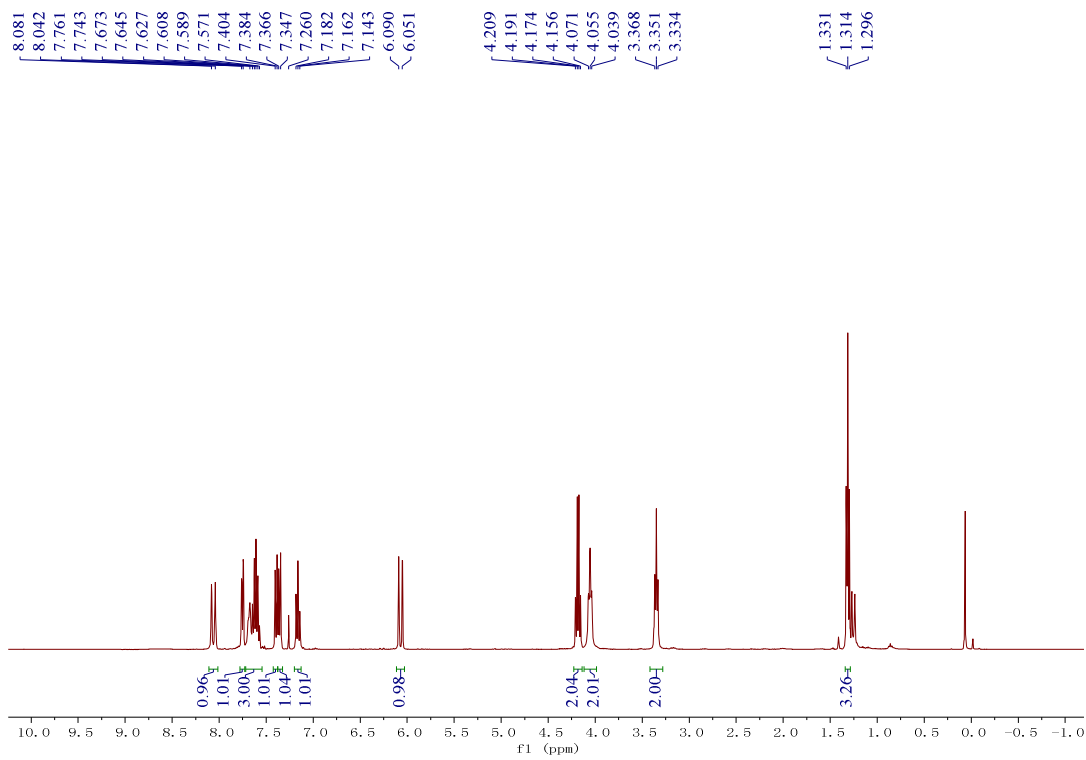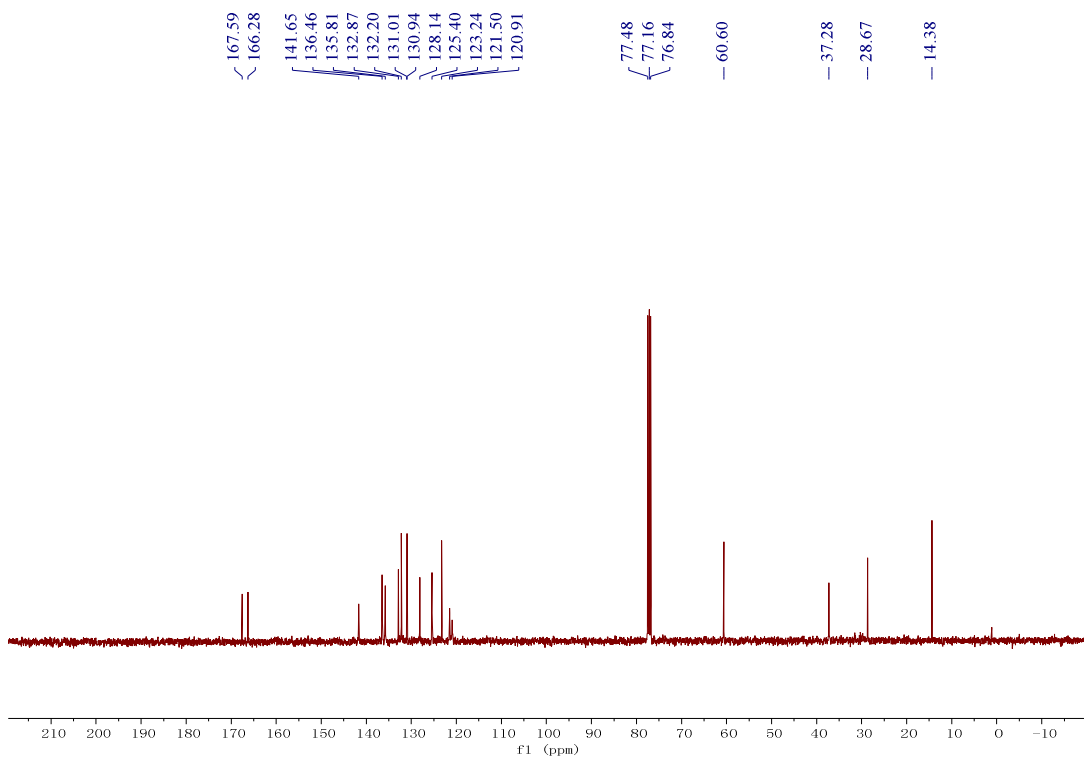

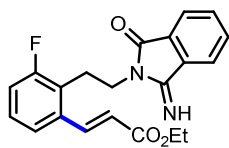

**2c**

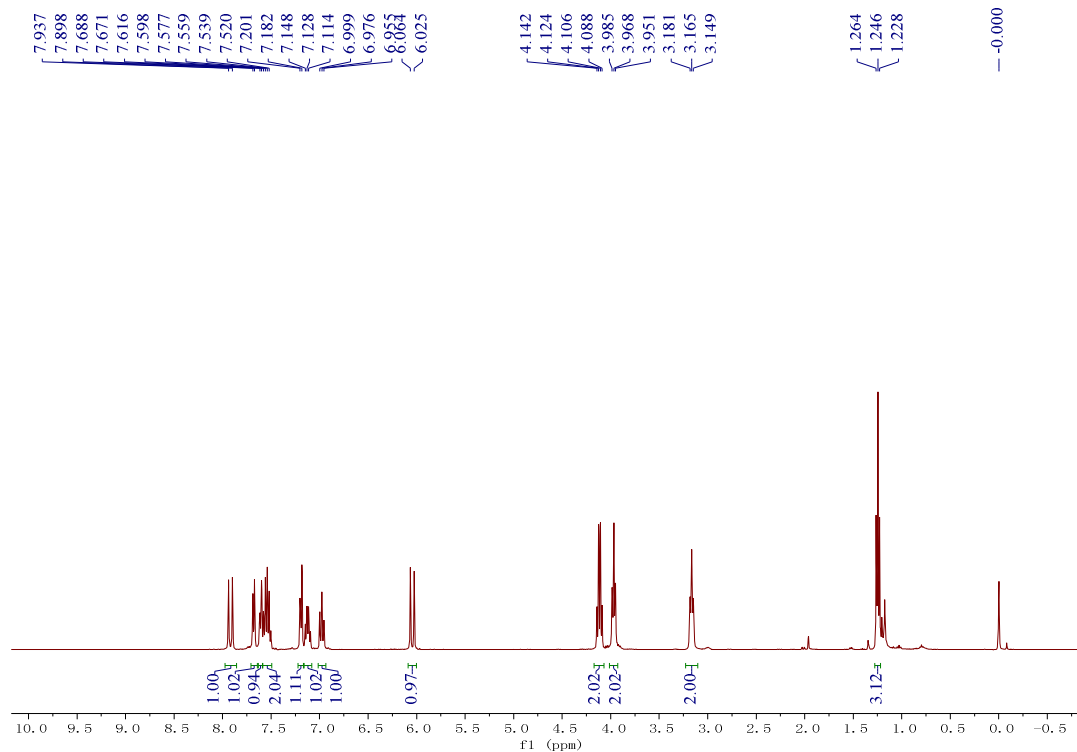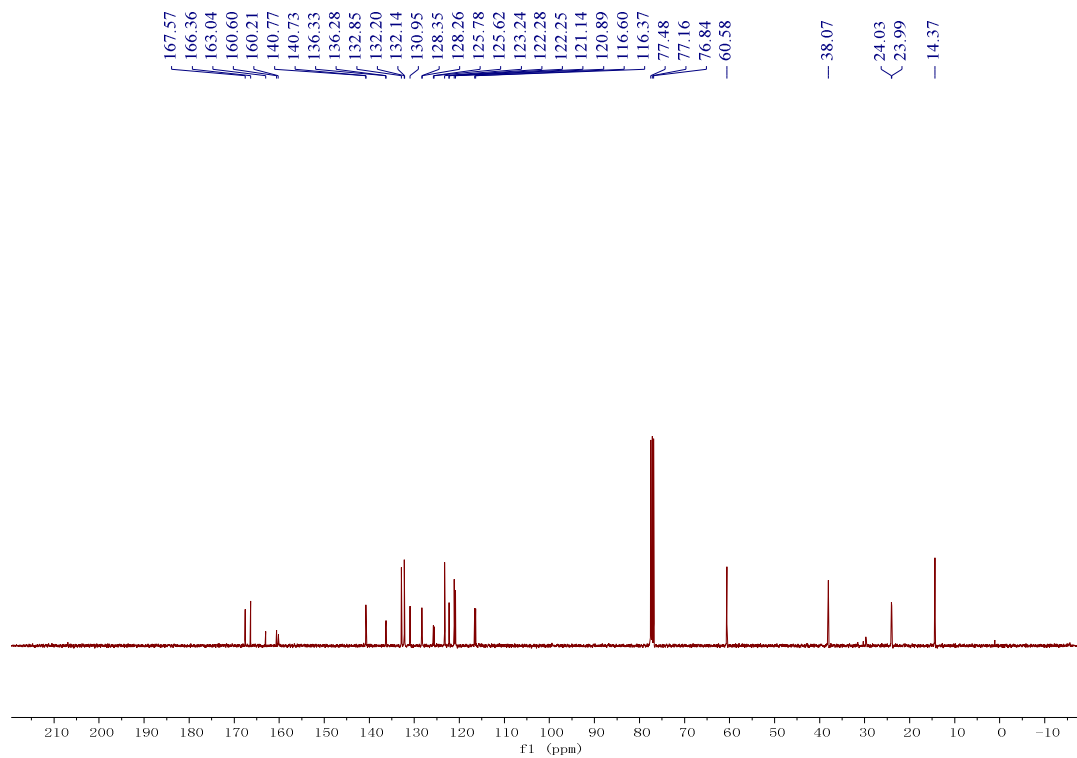



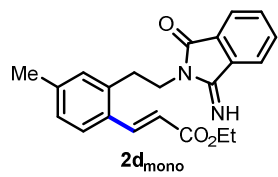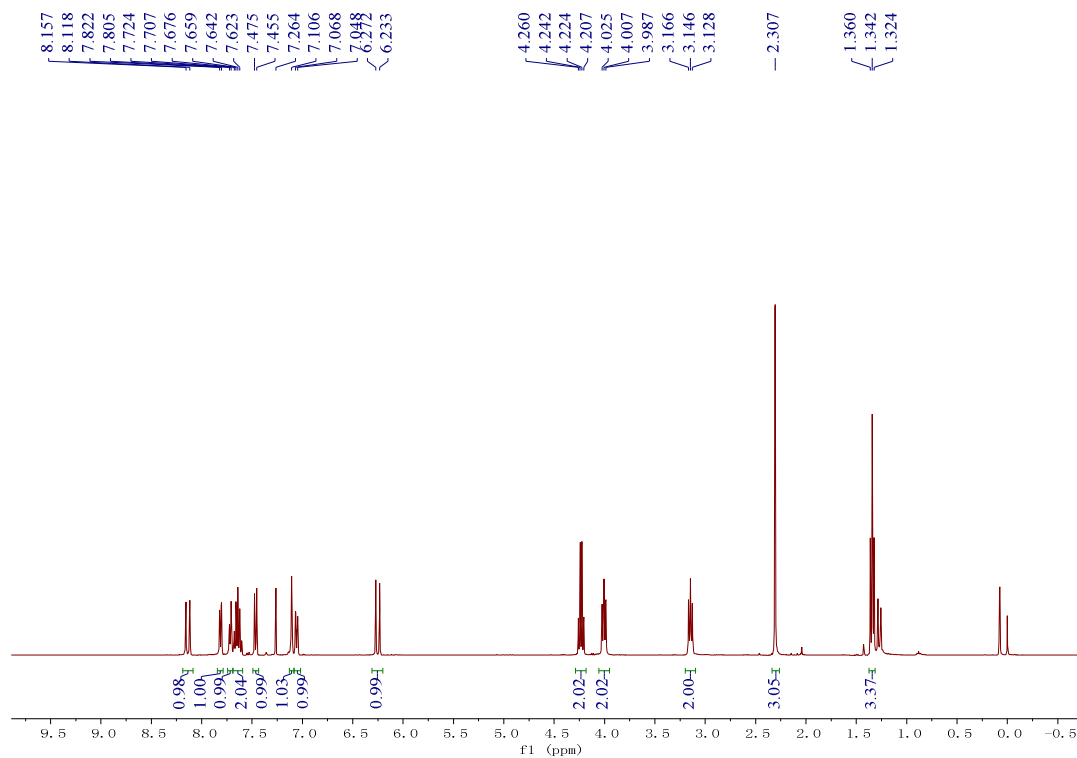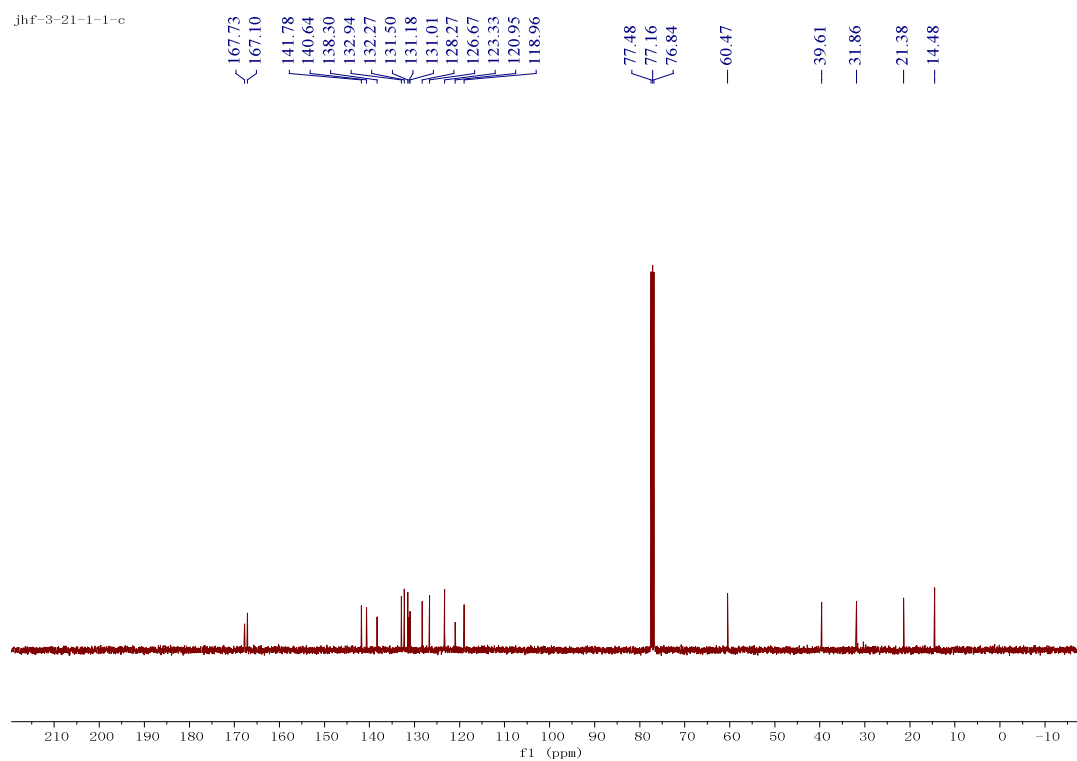

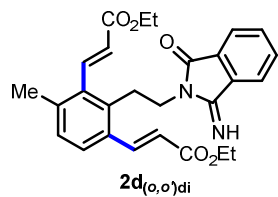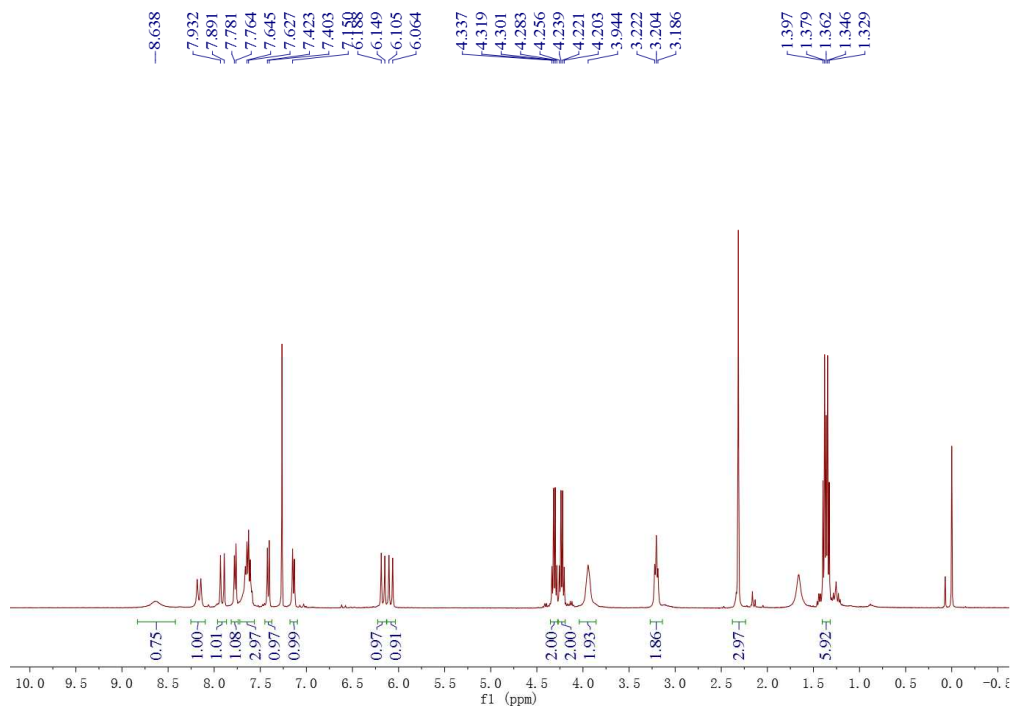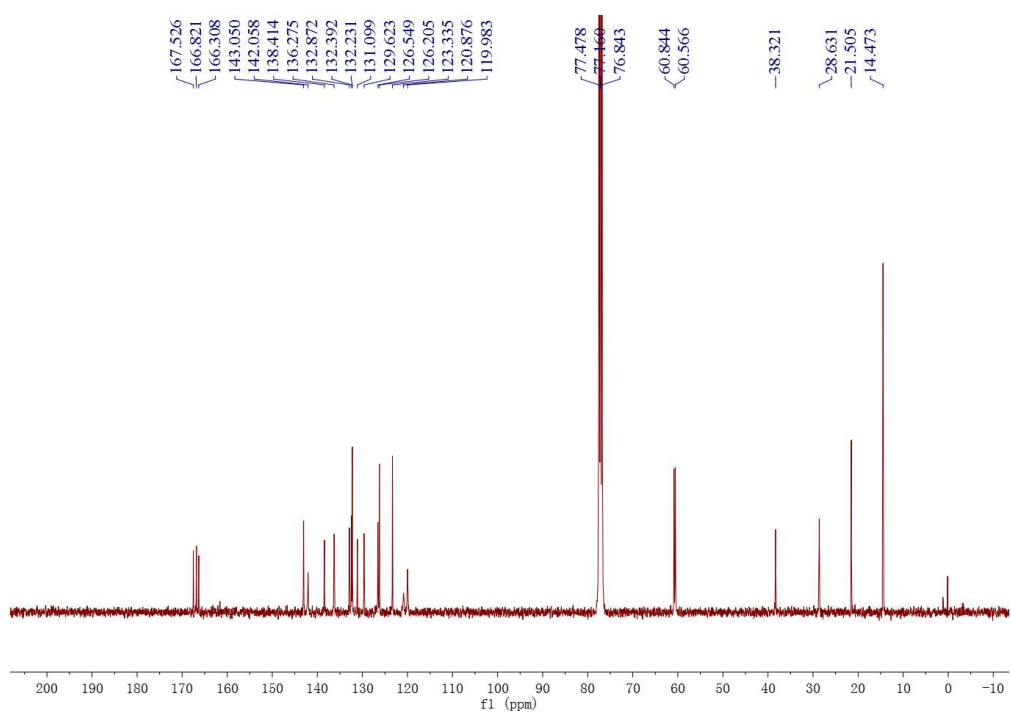

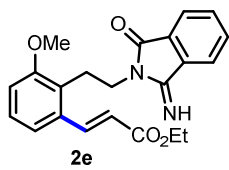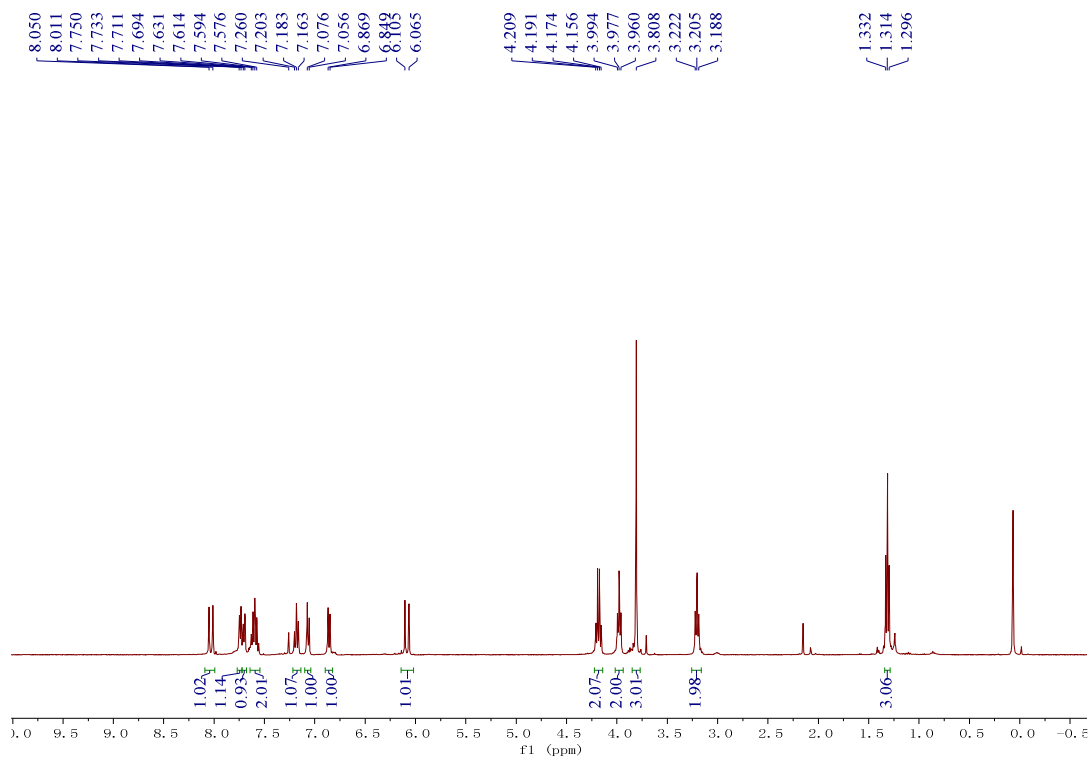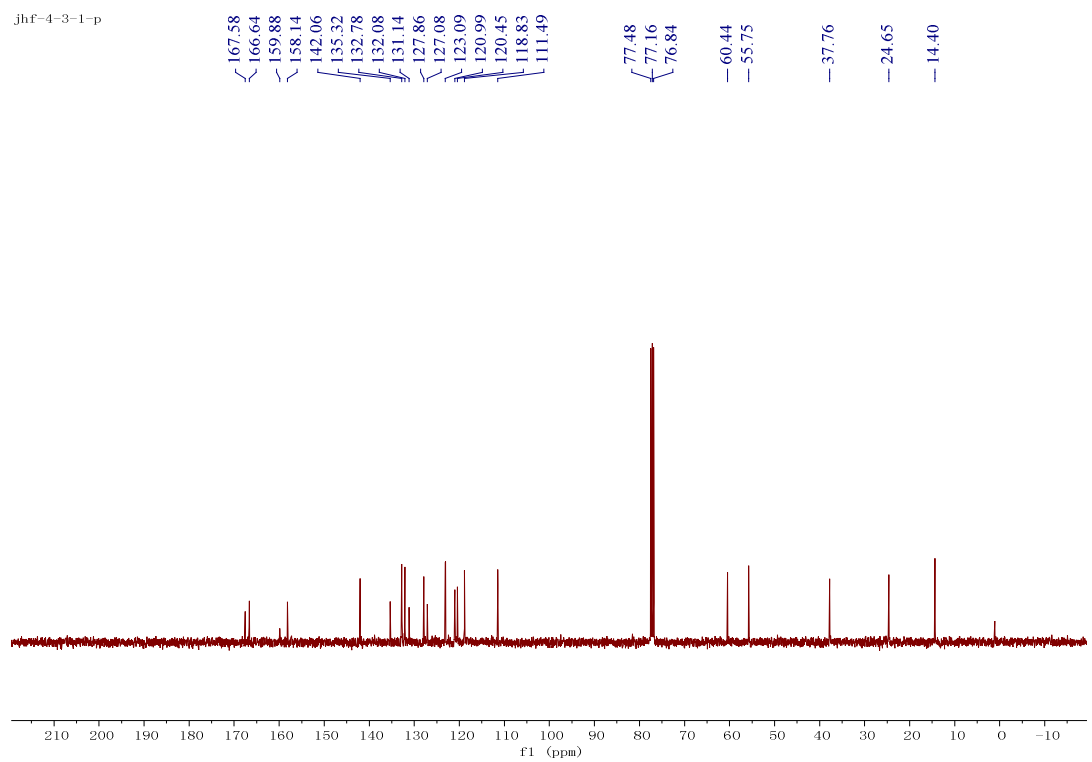

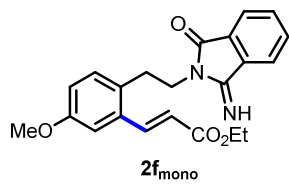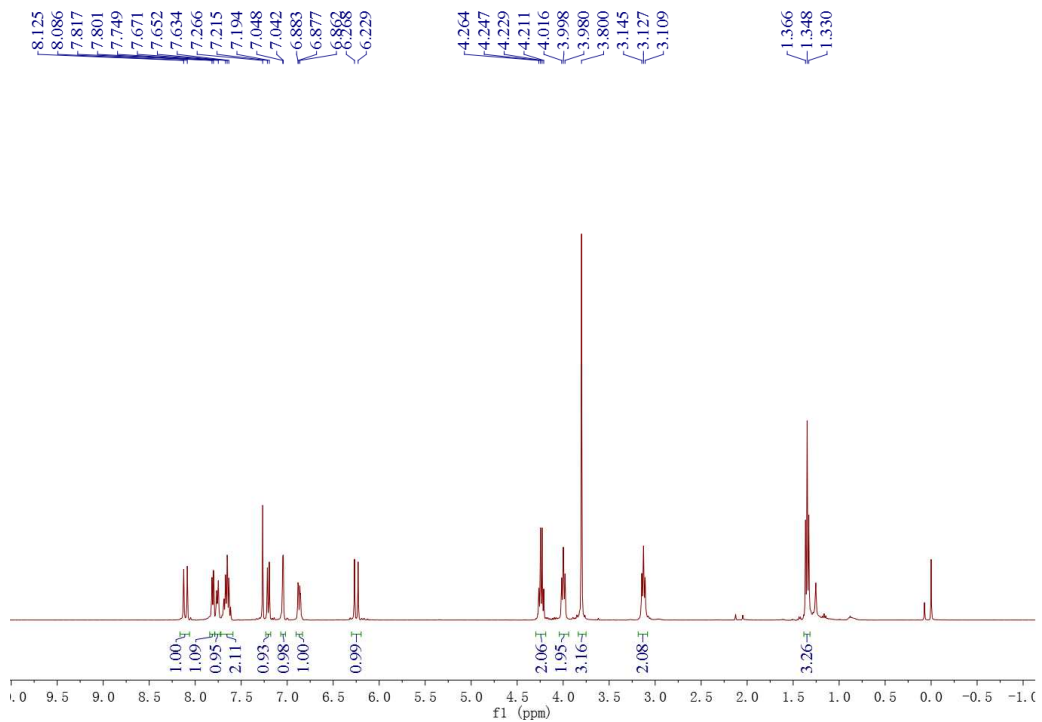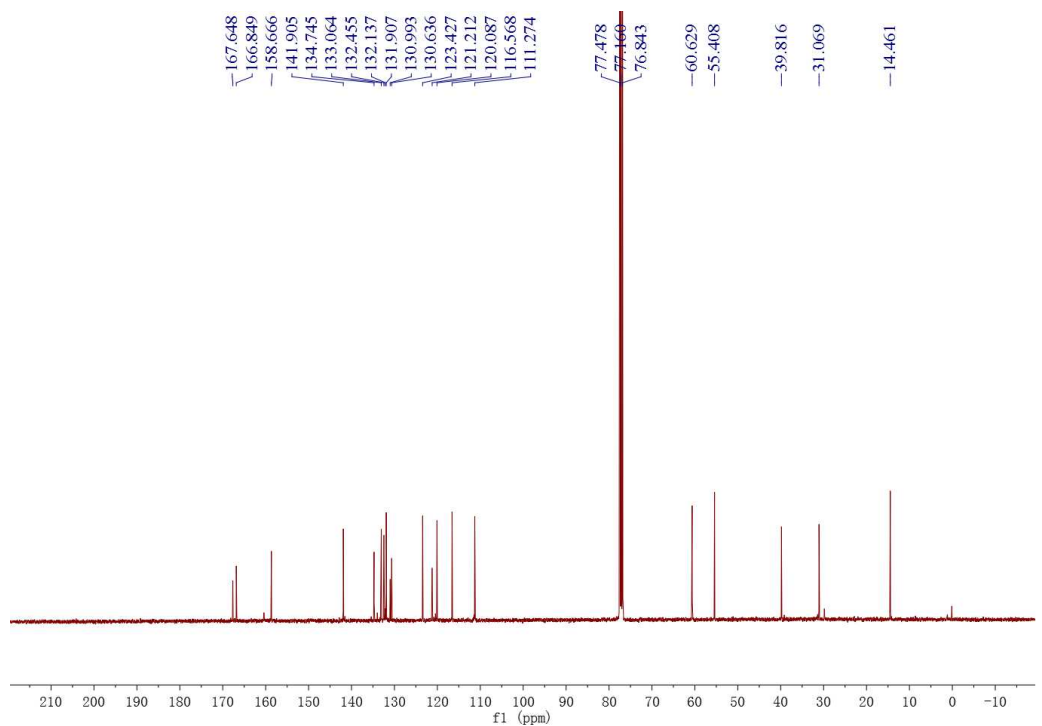

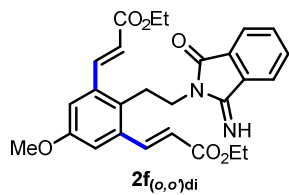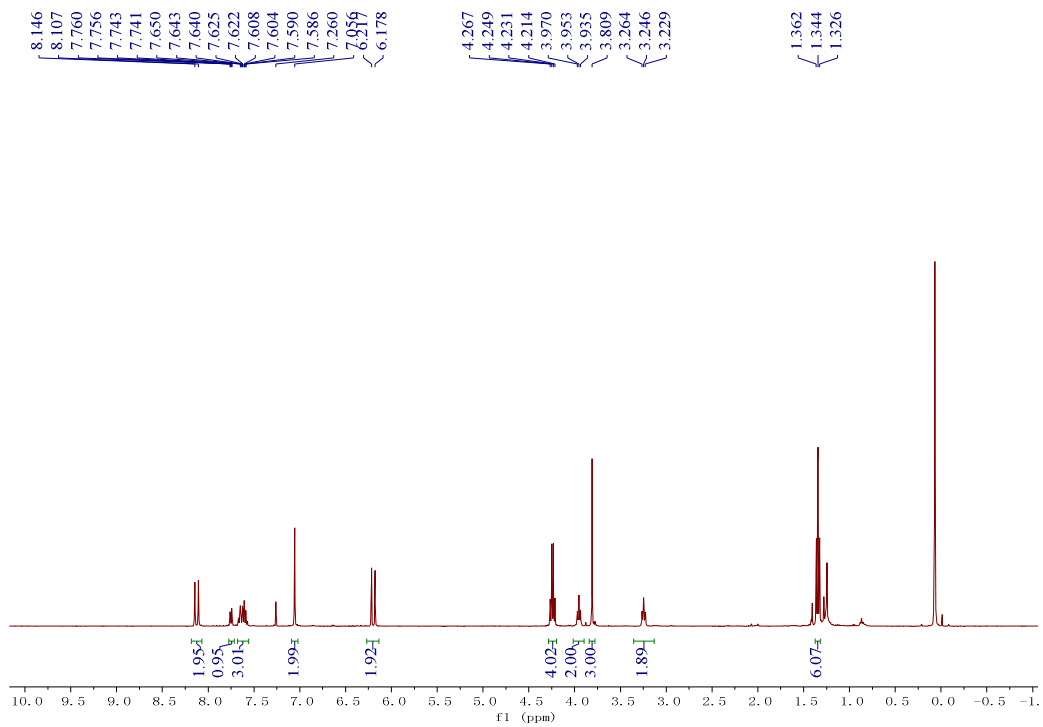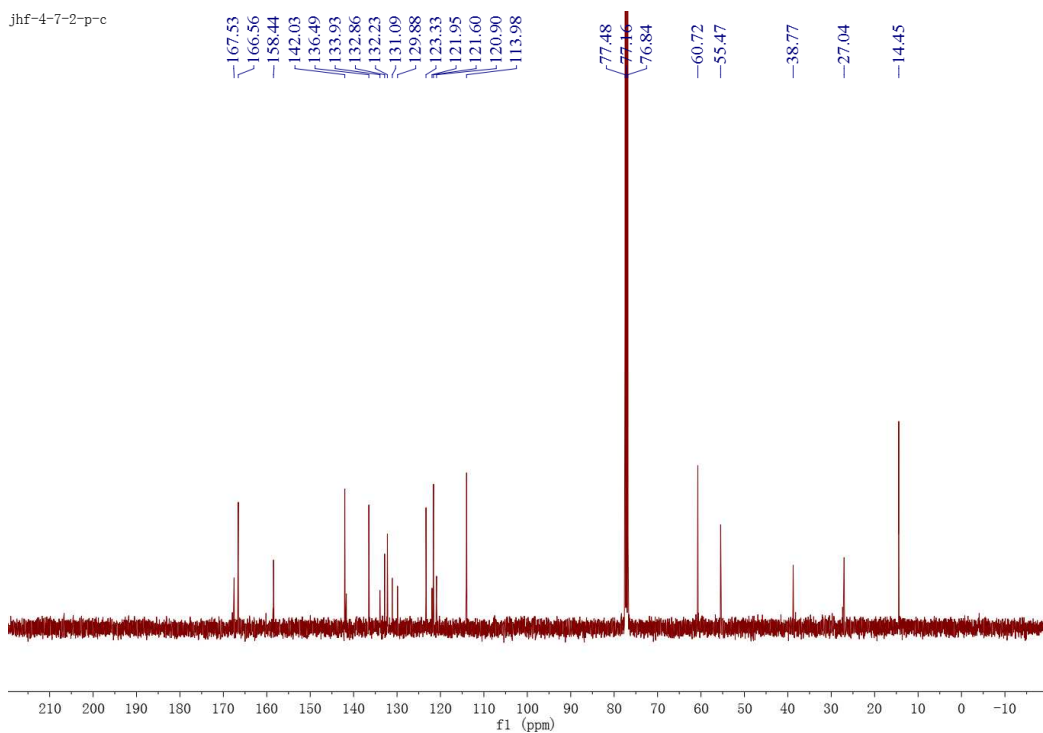

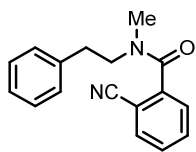

3a

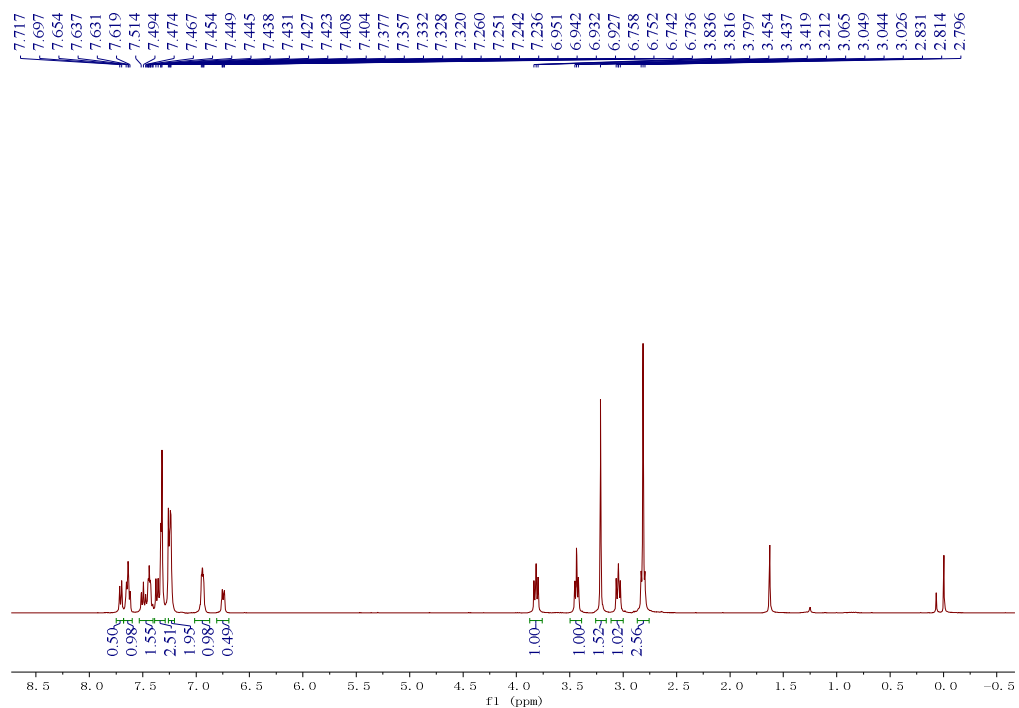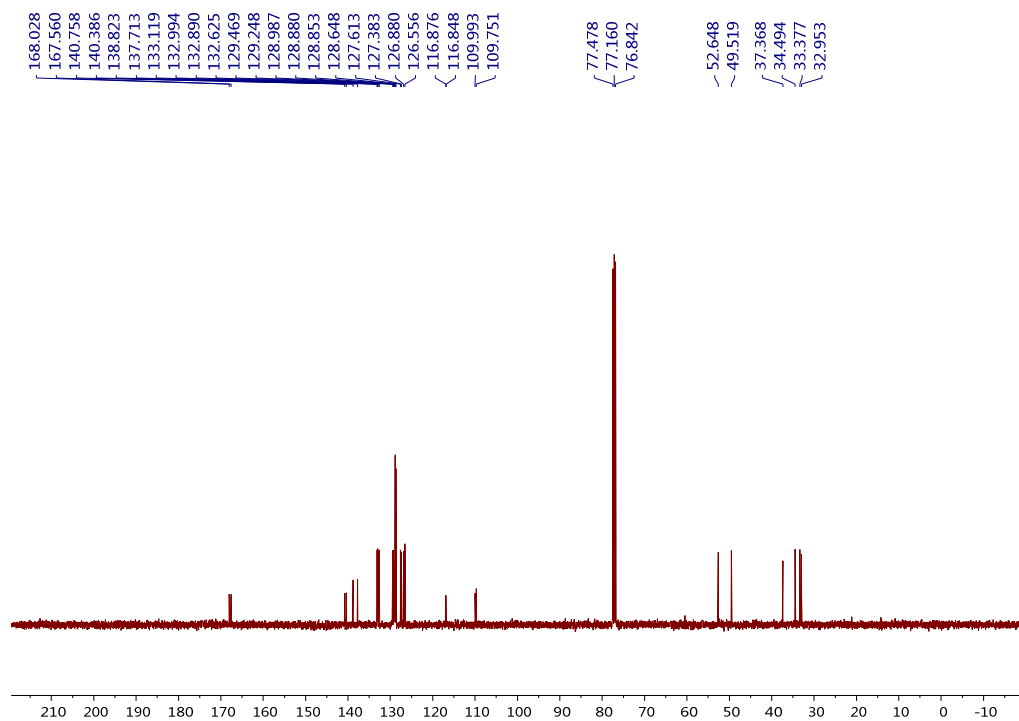

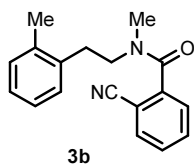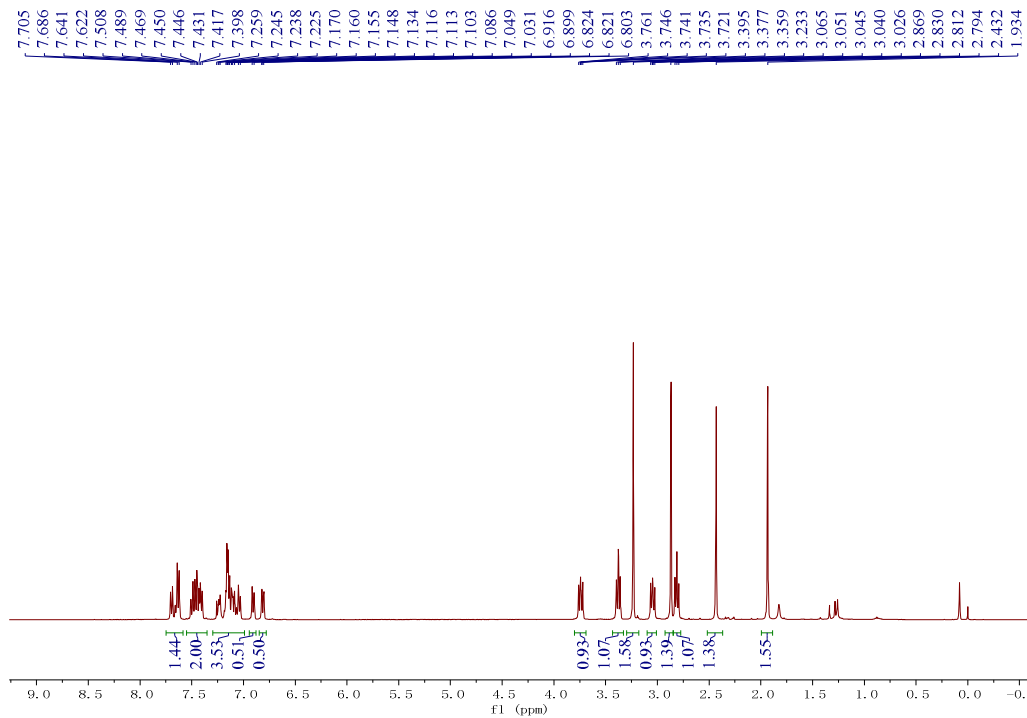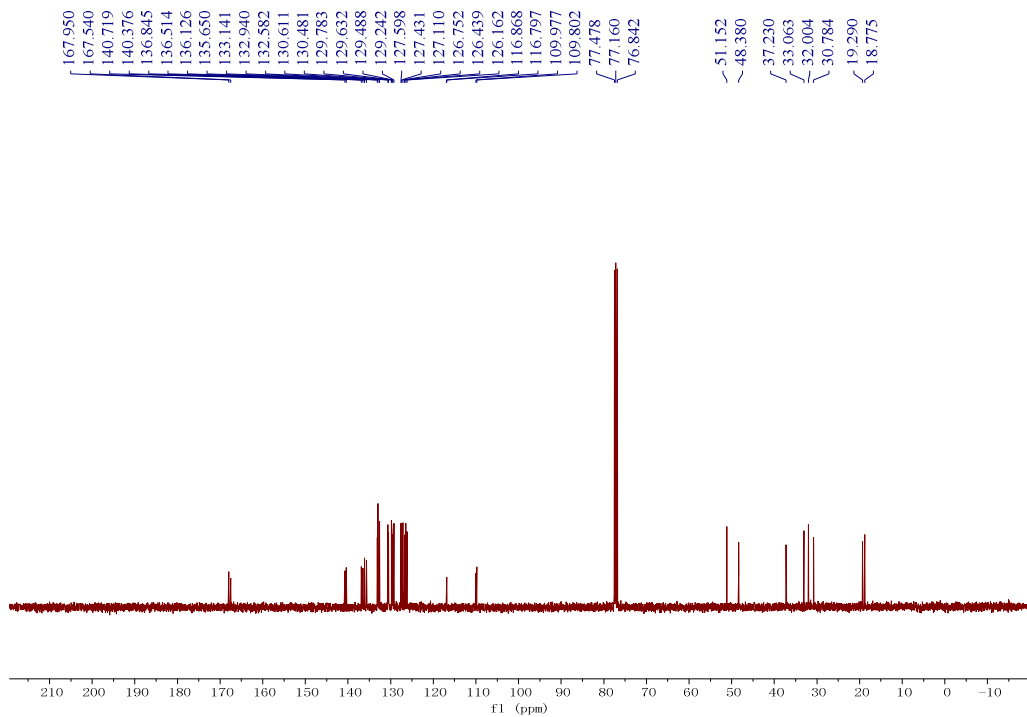

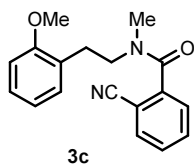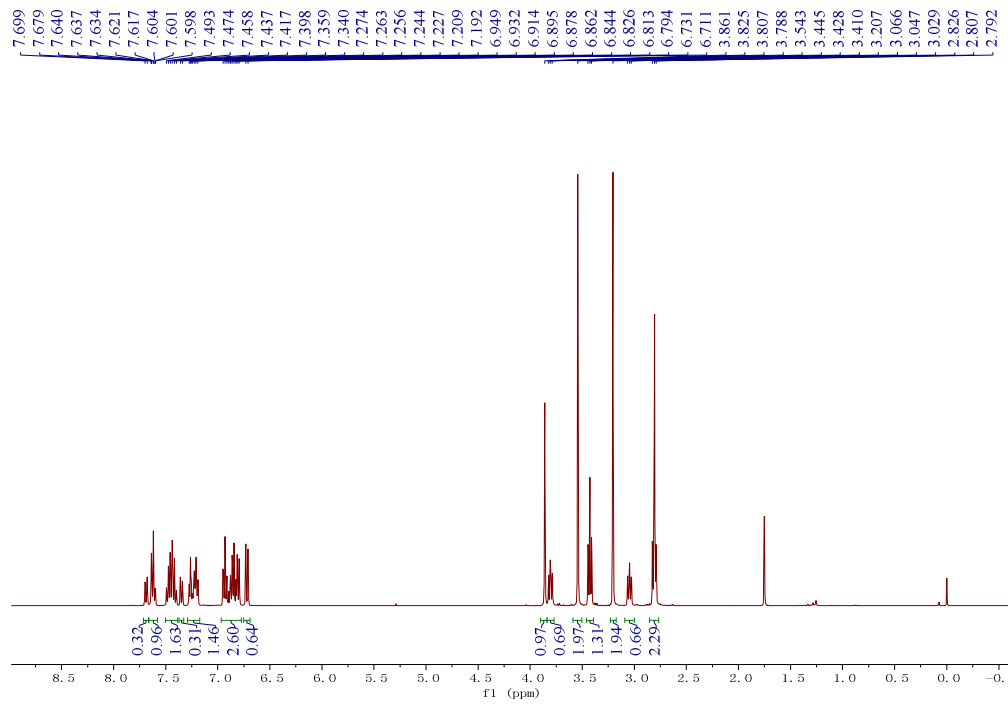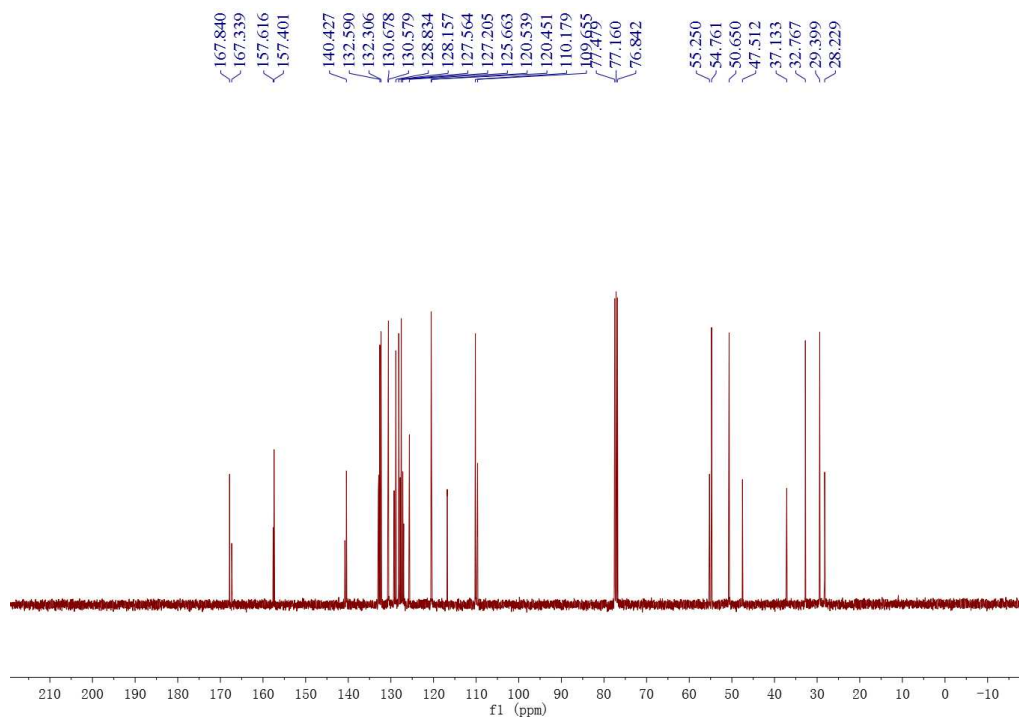



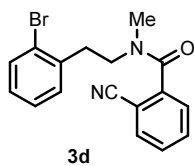

3d

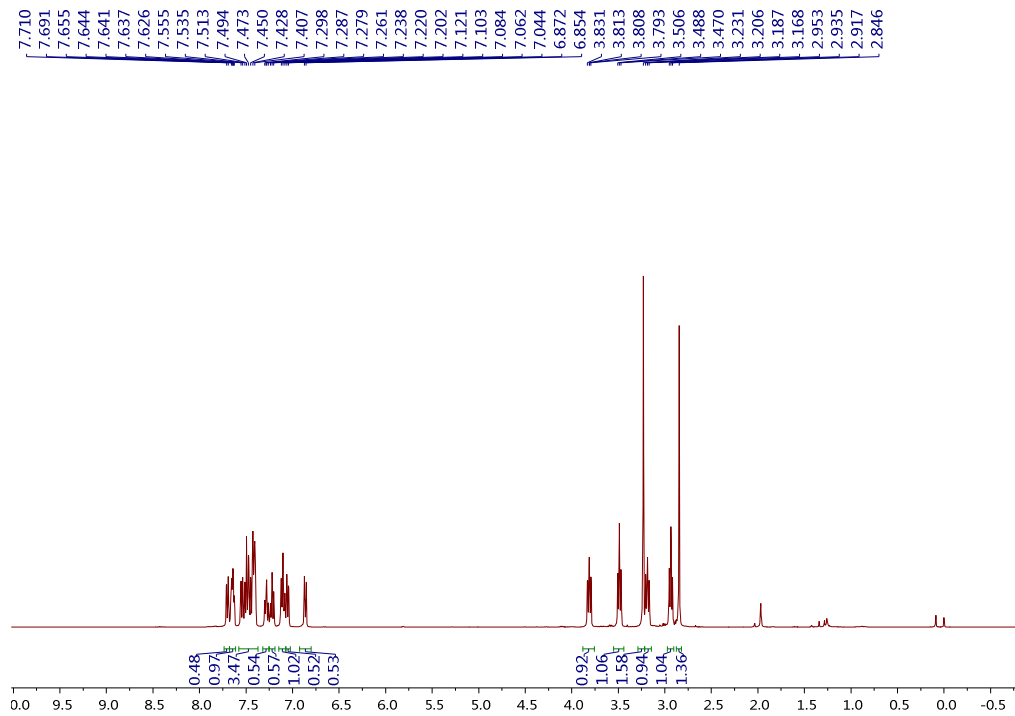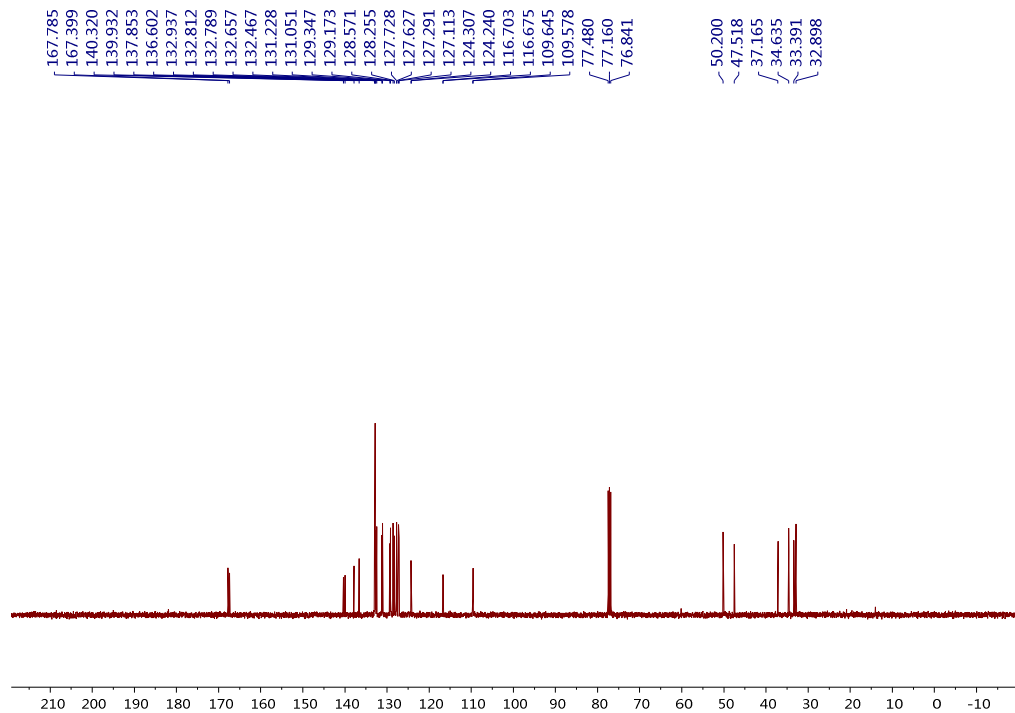

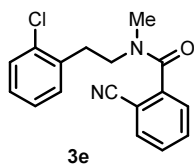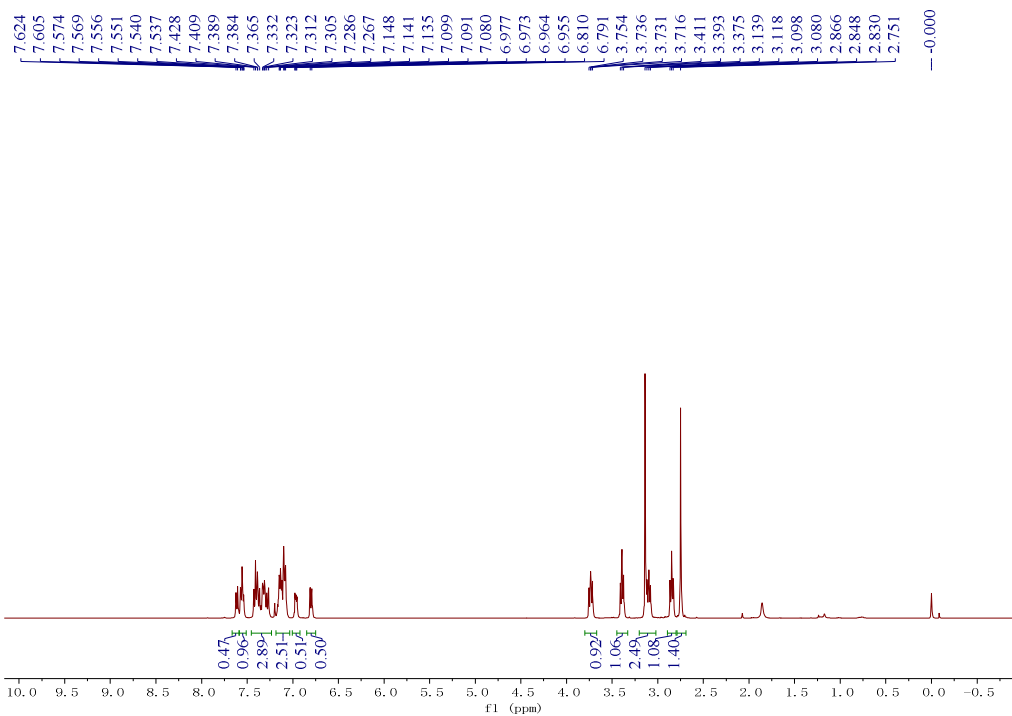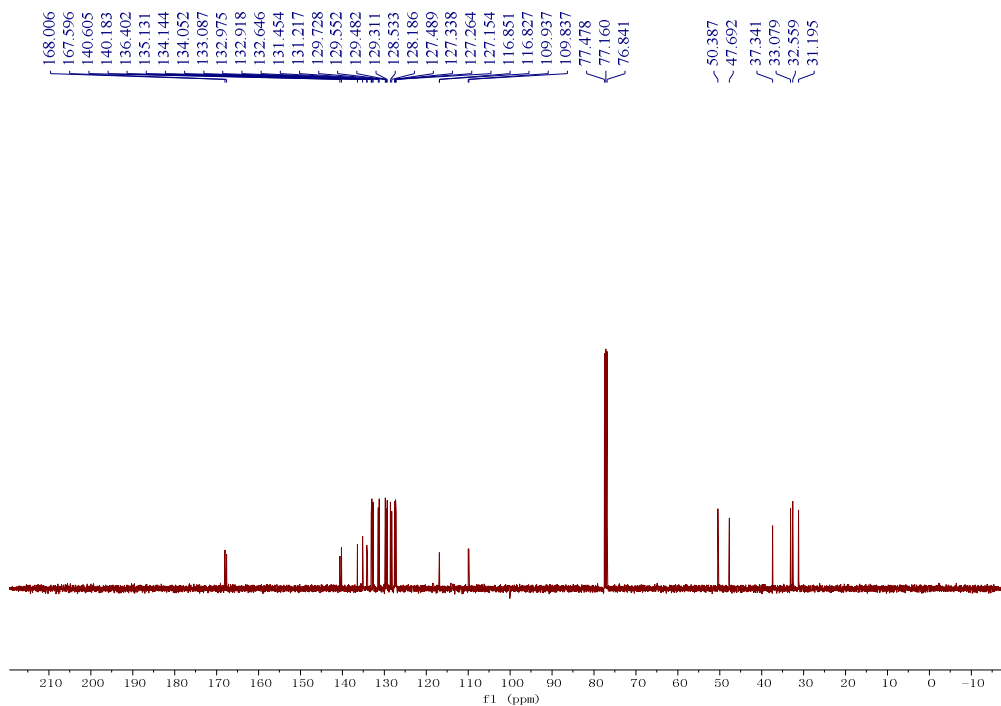

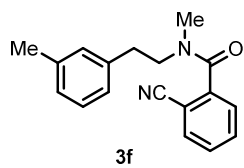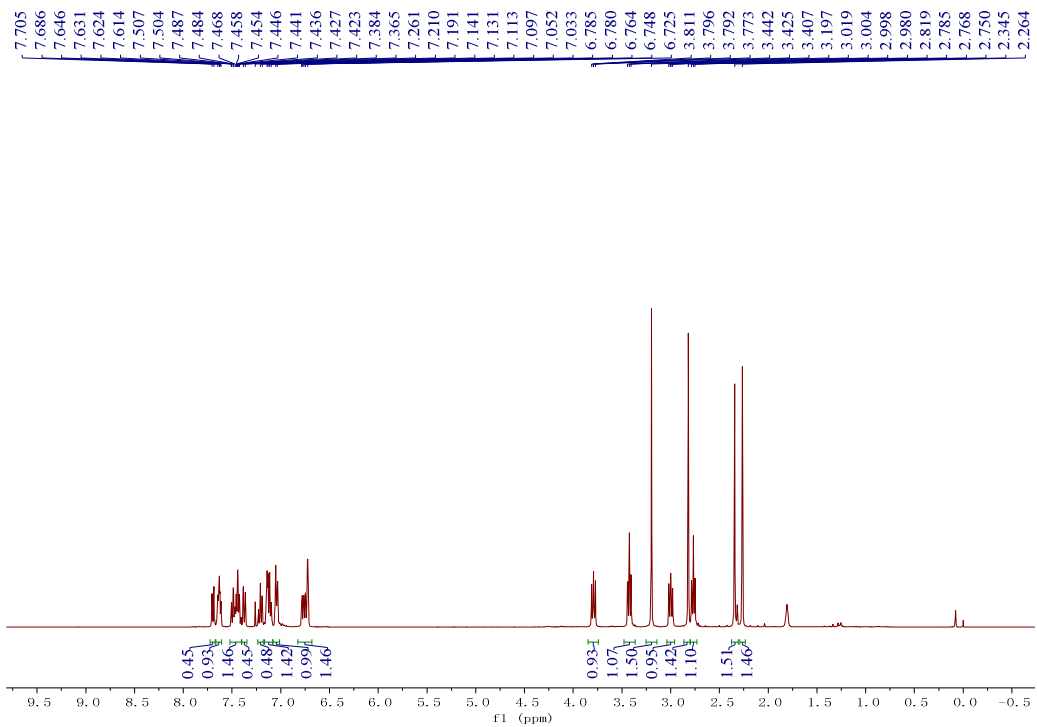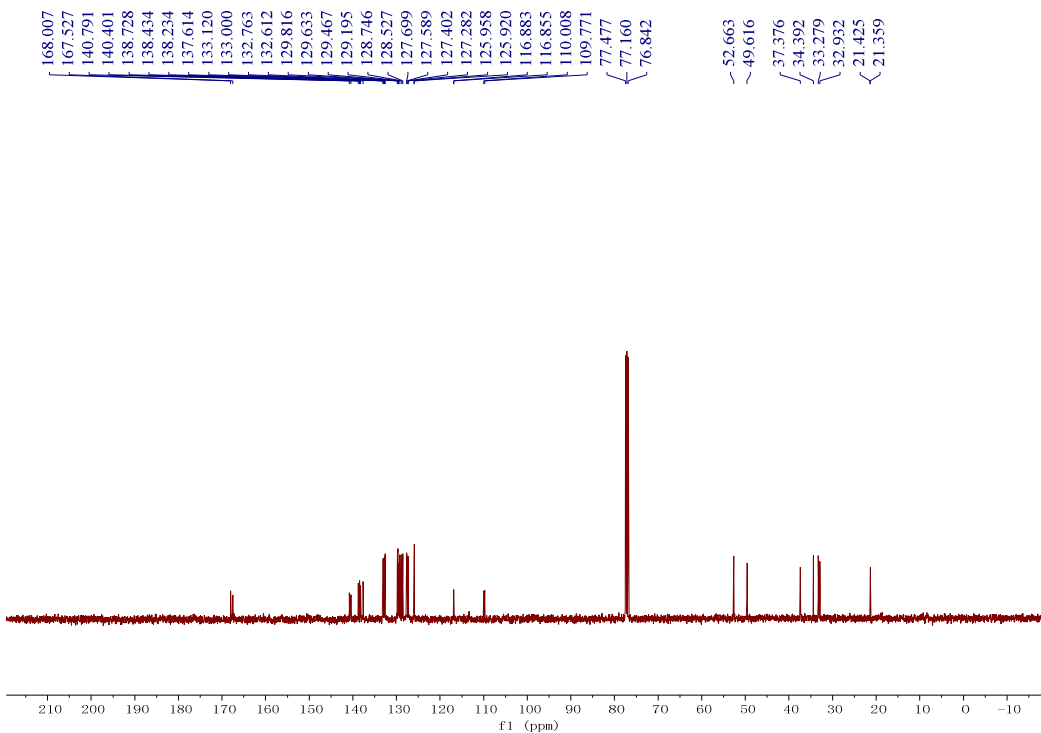

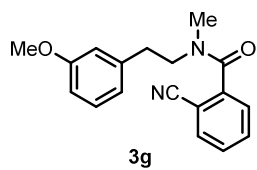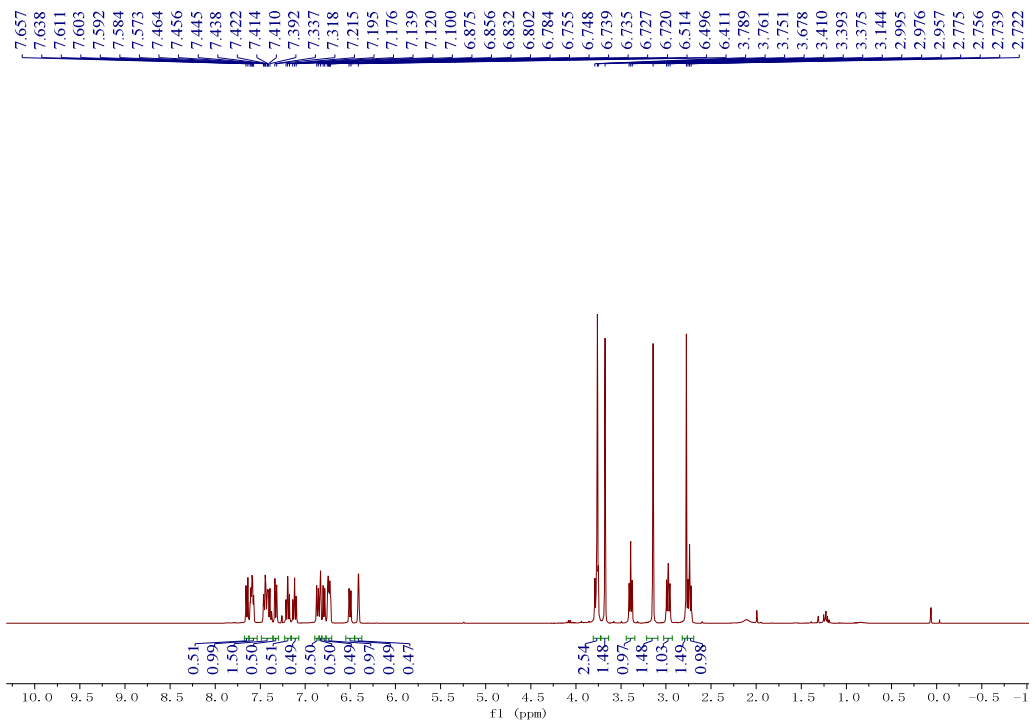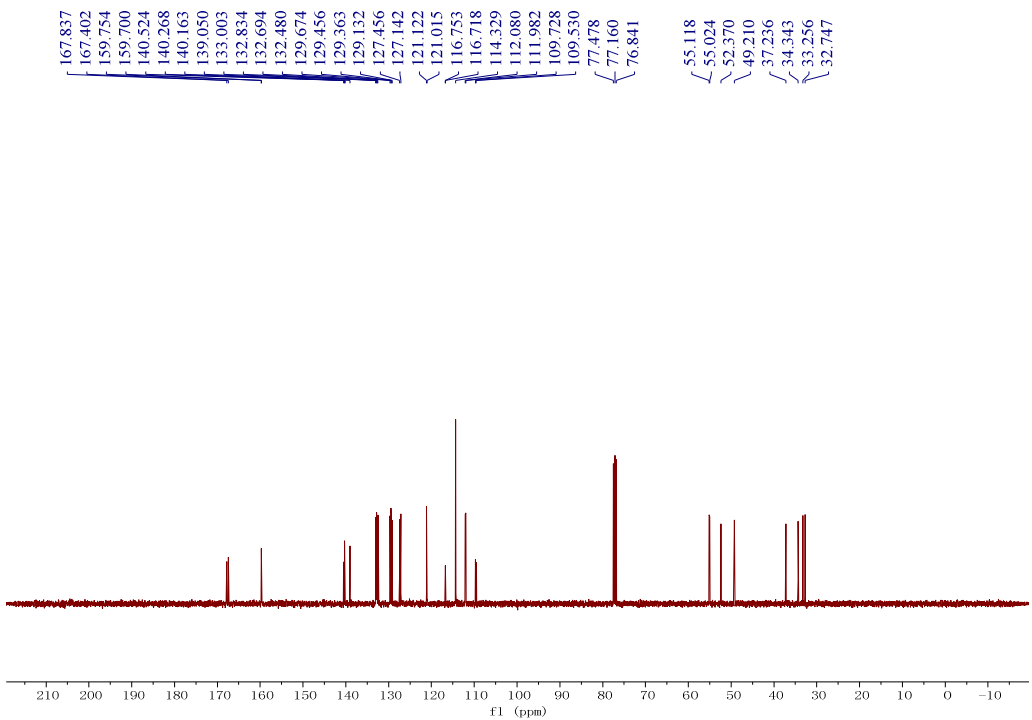

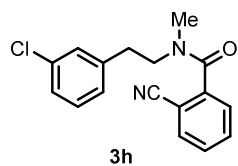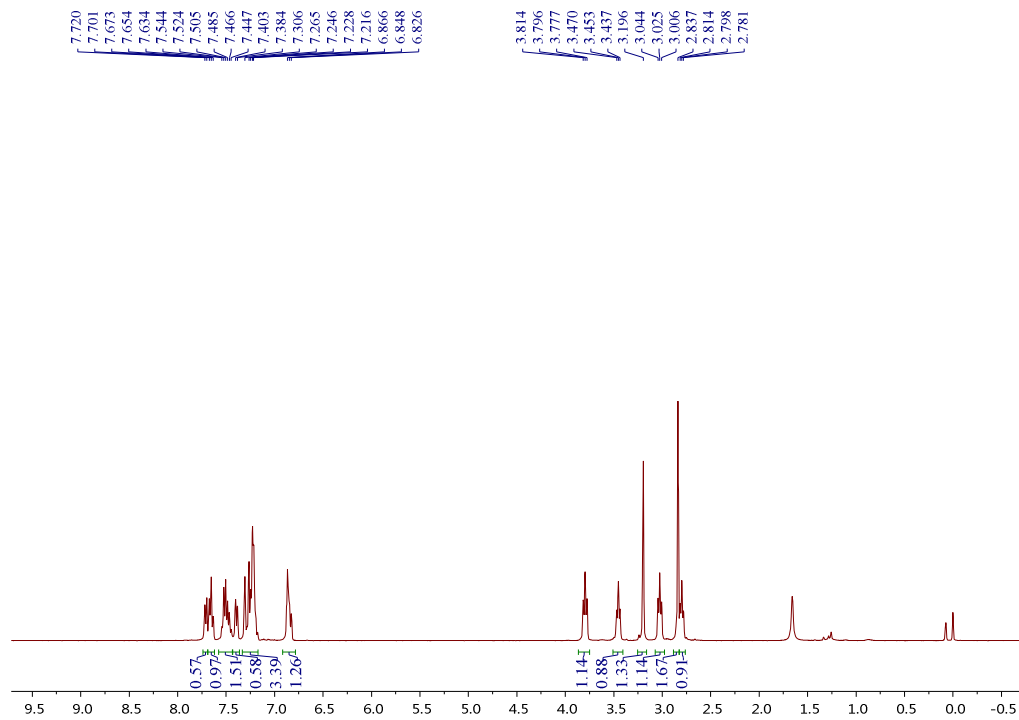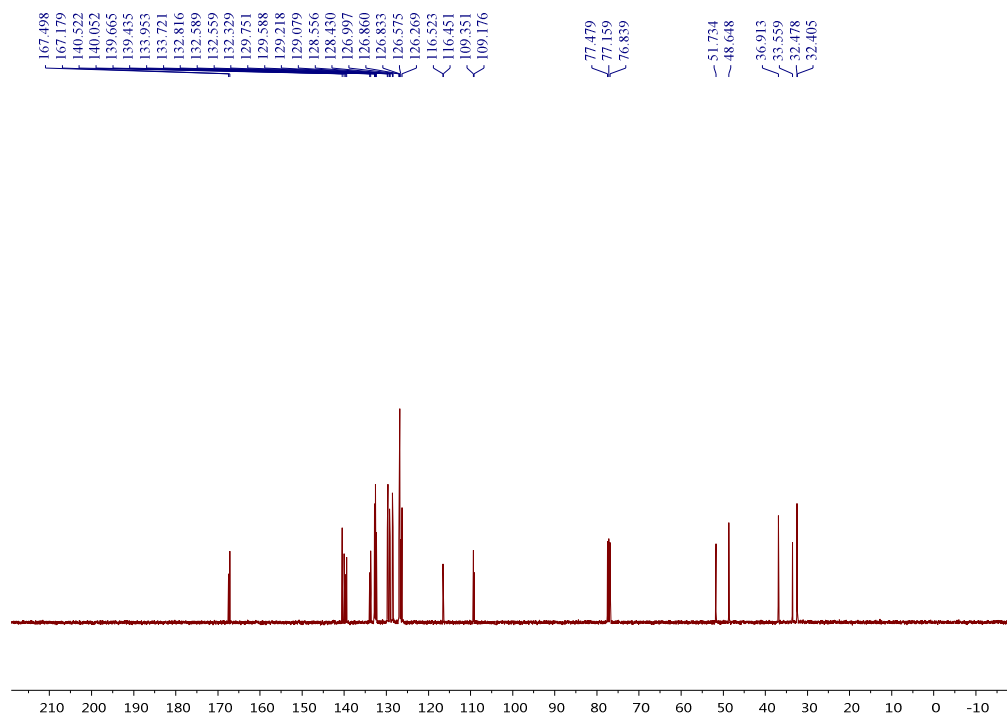

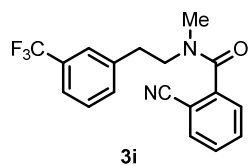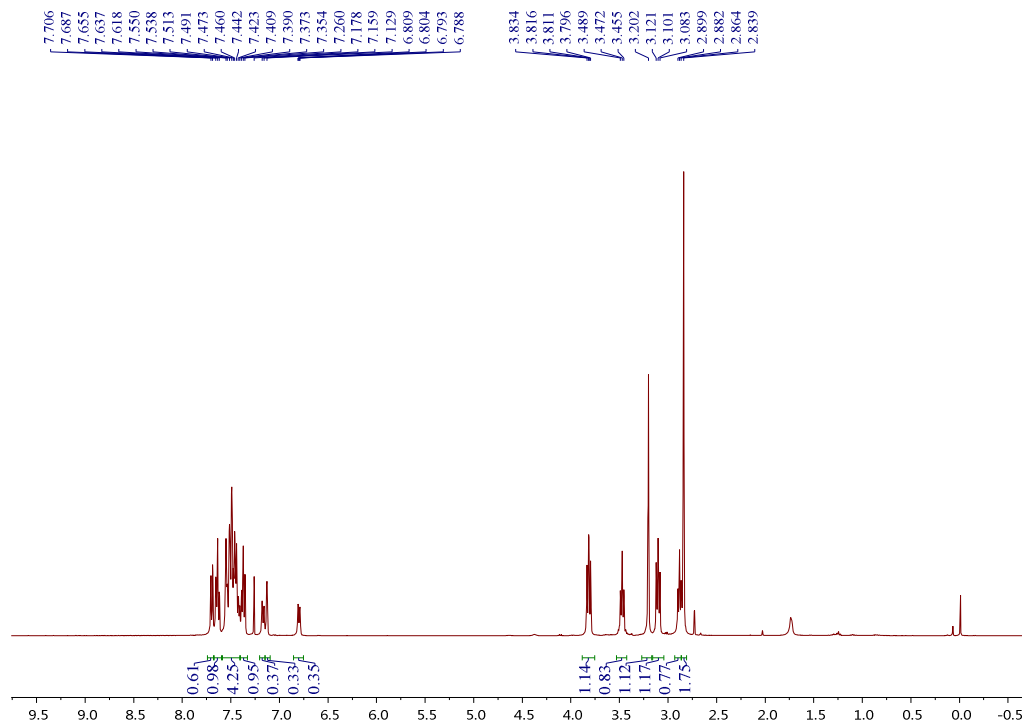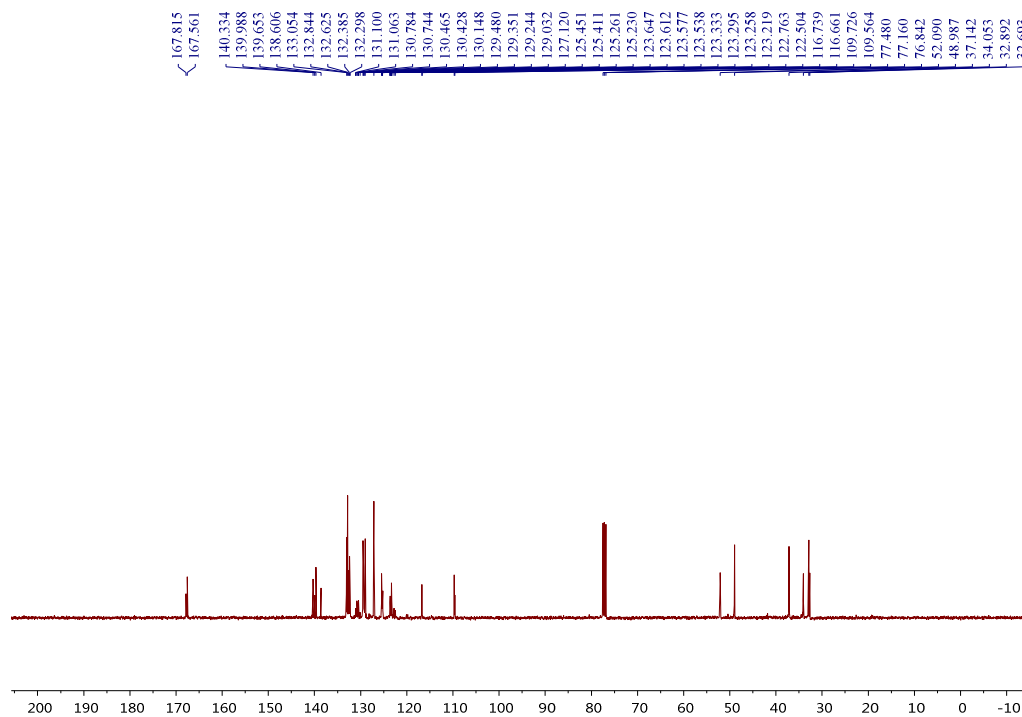

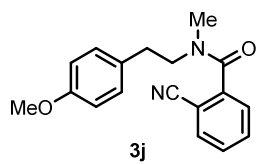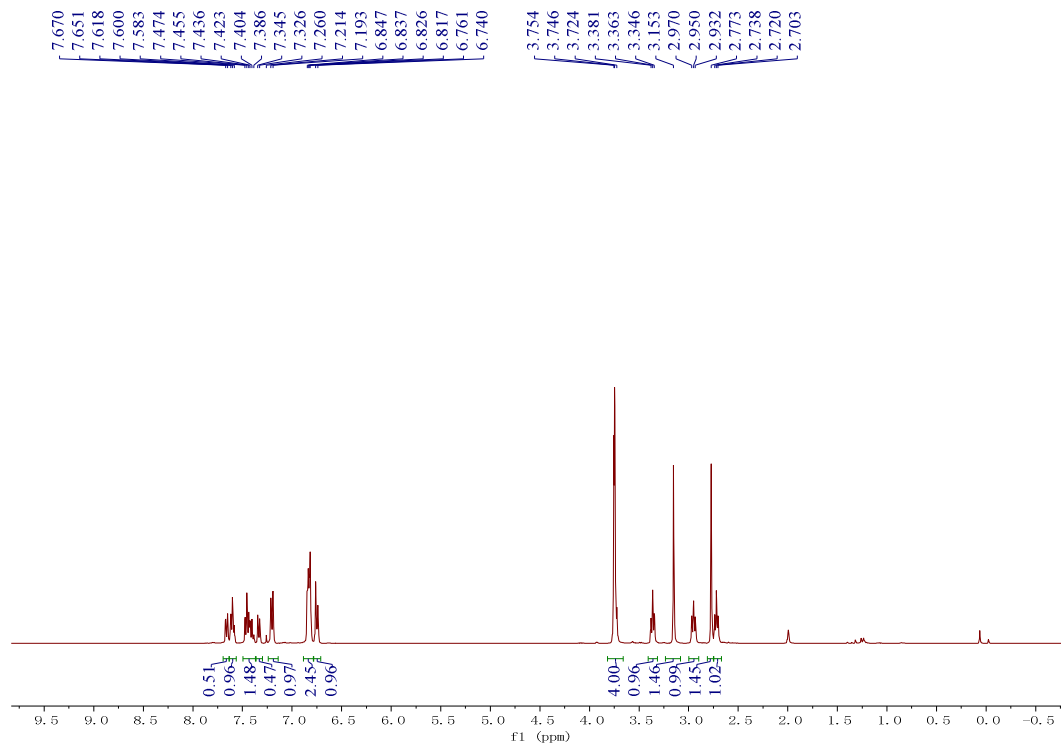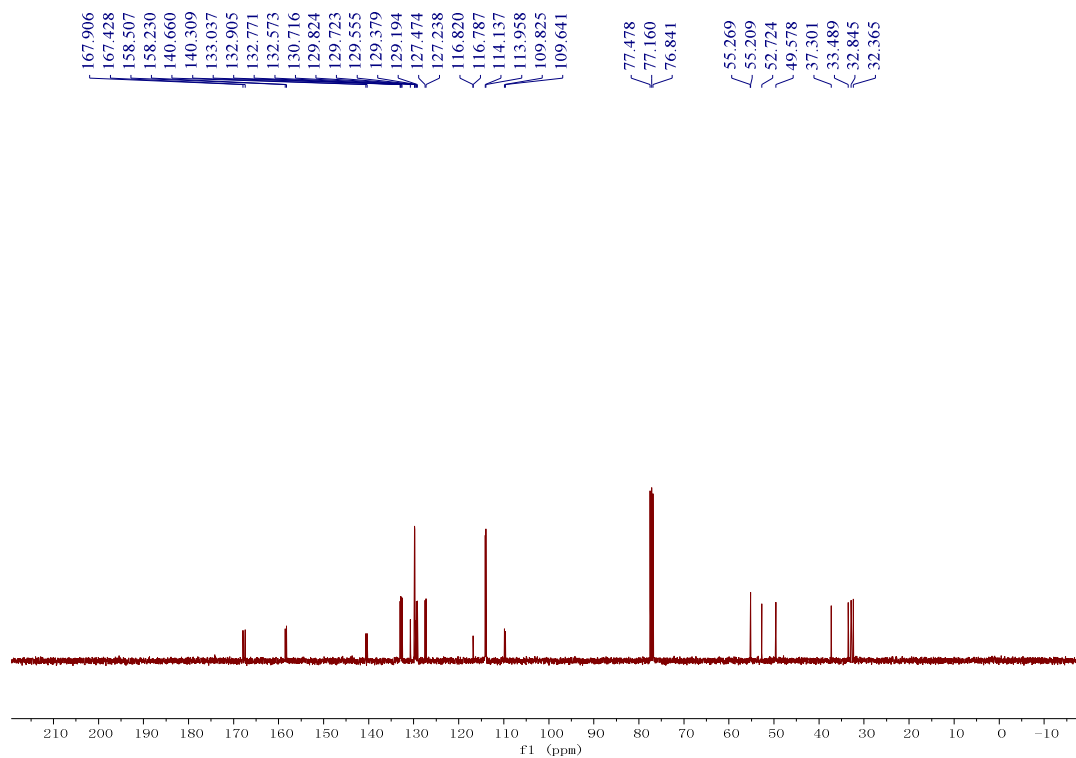

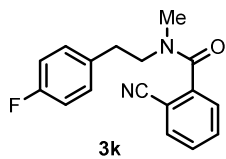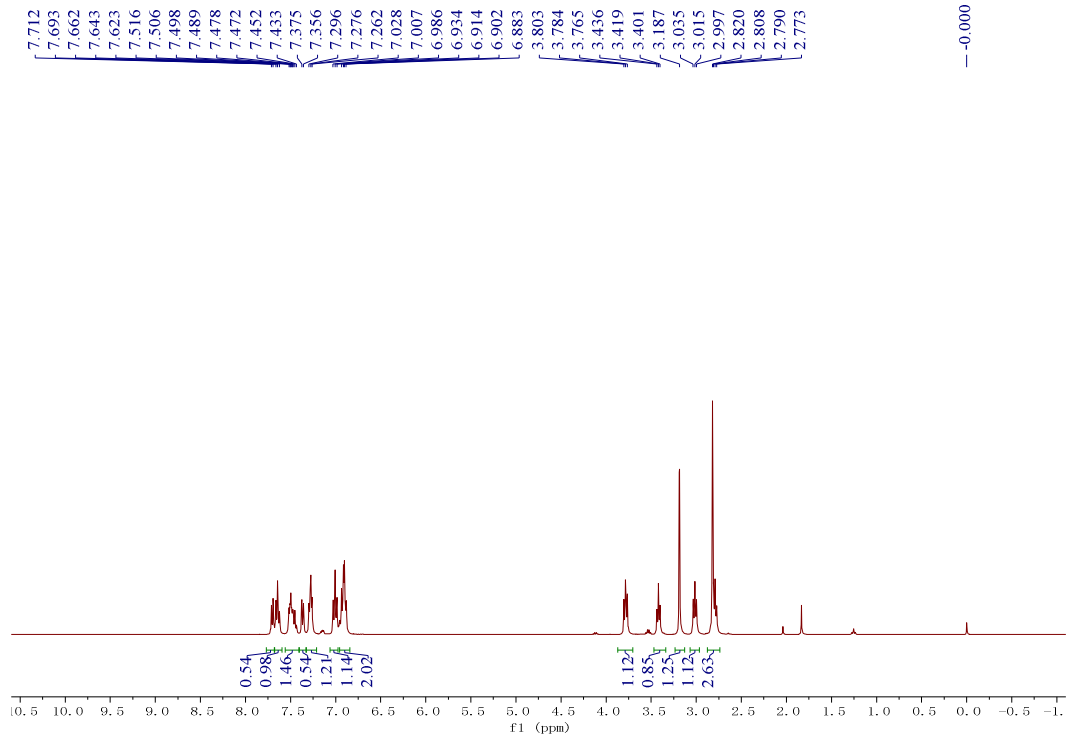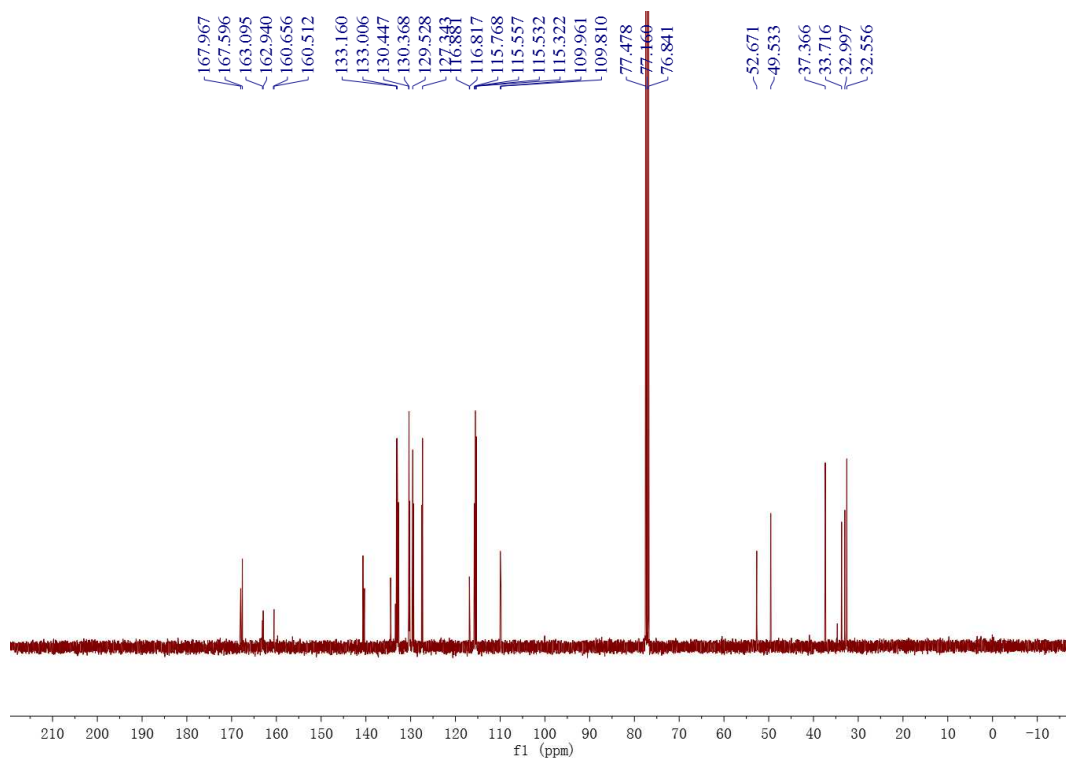



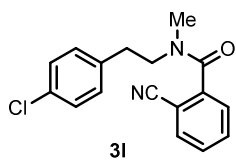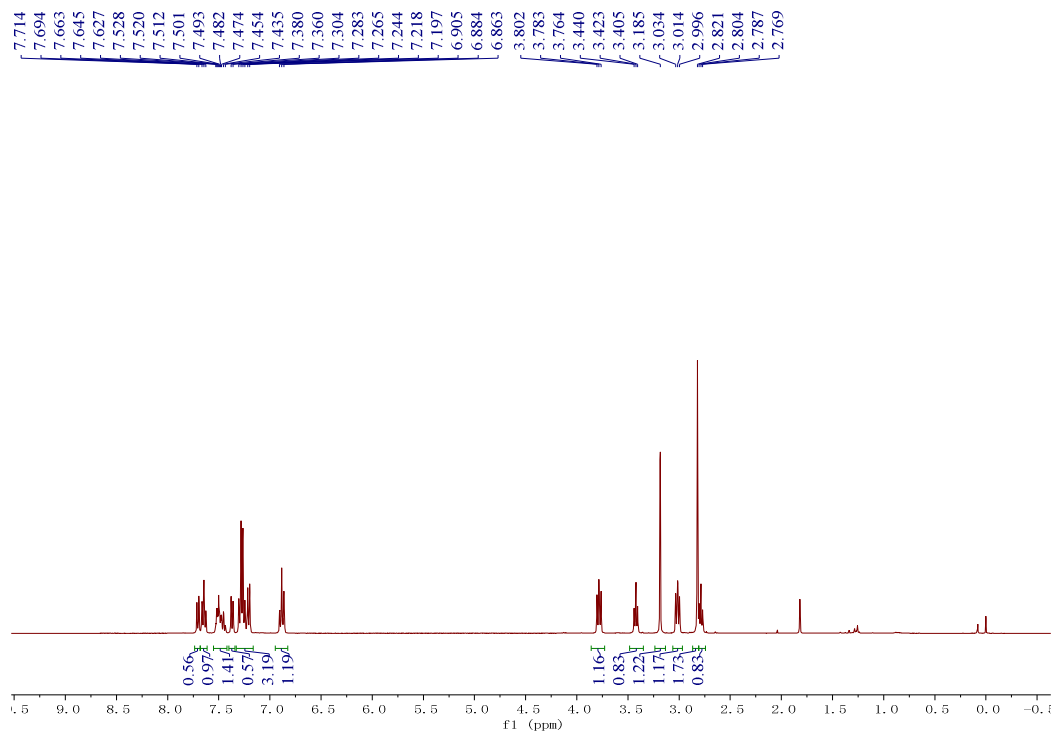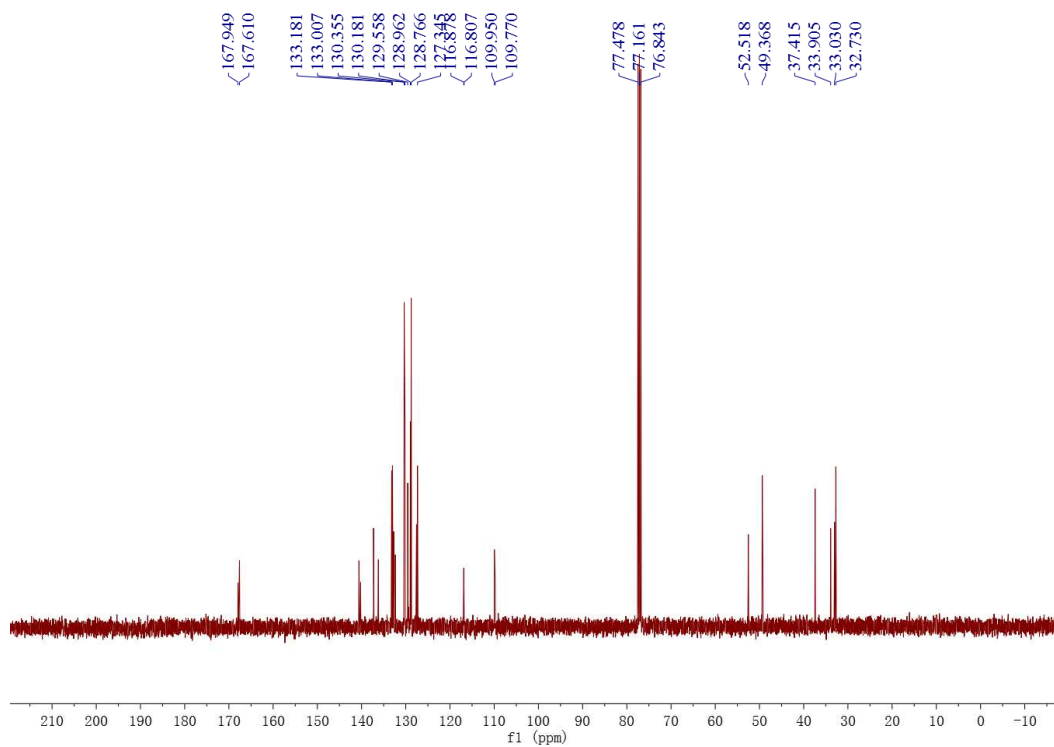

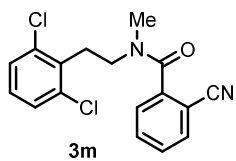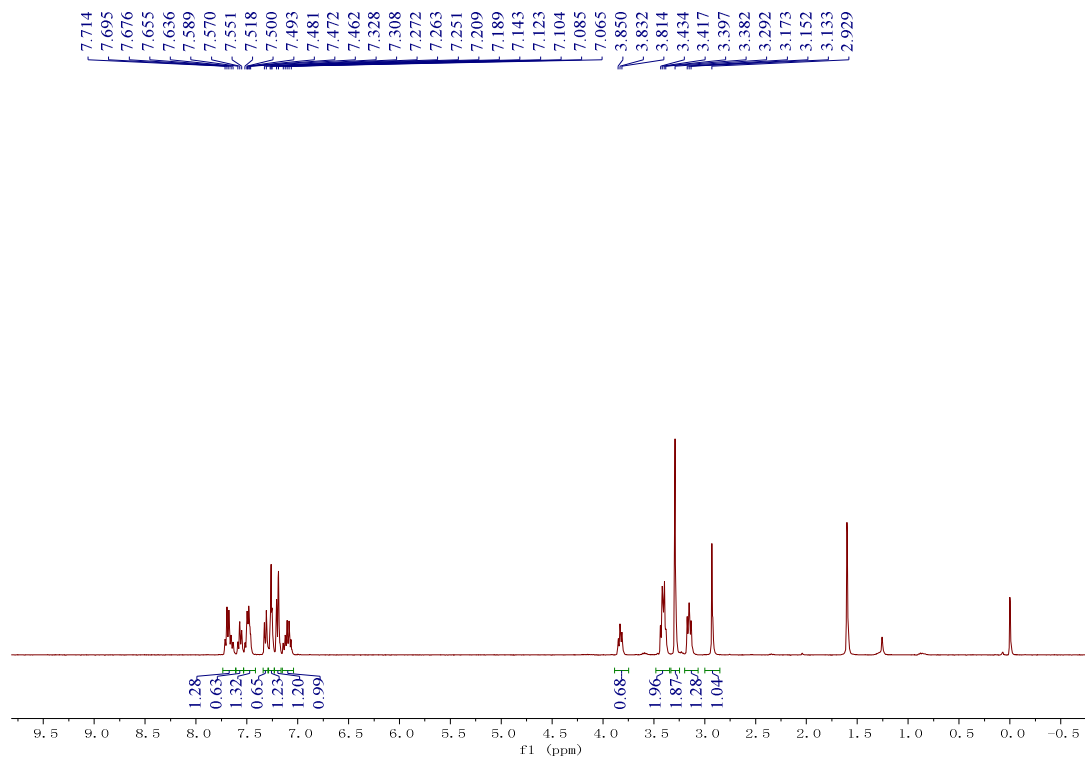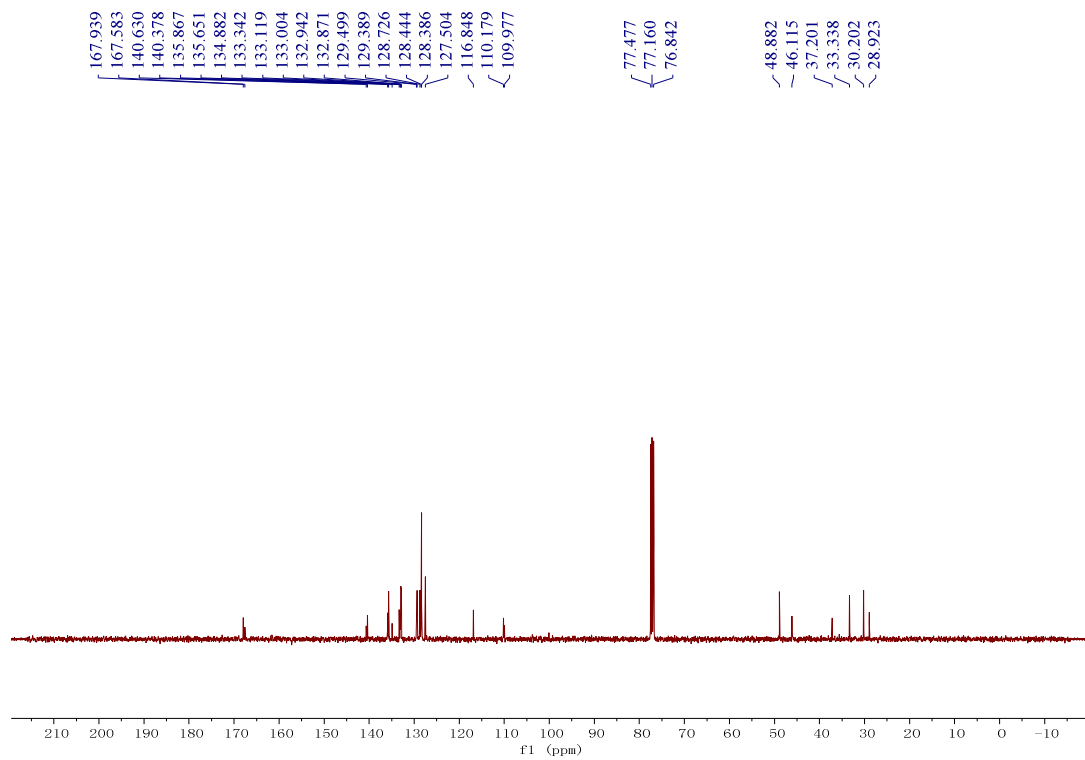

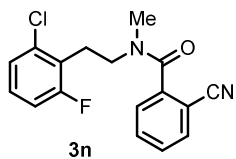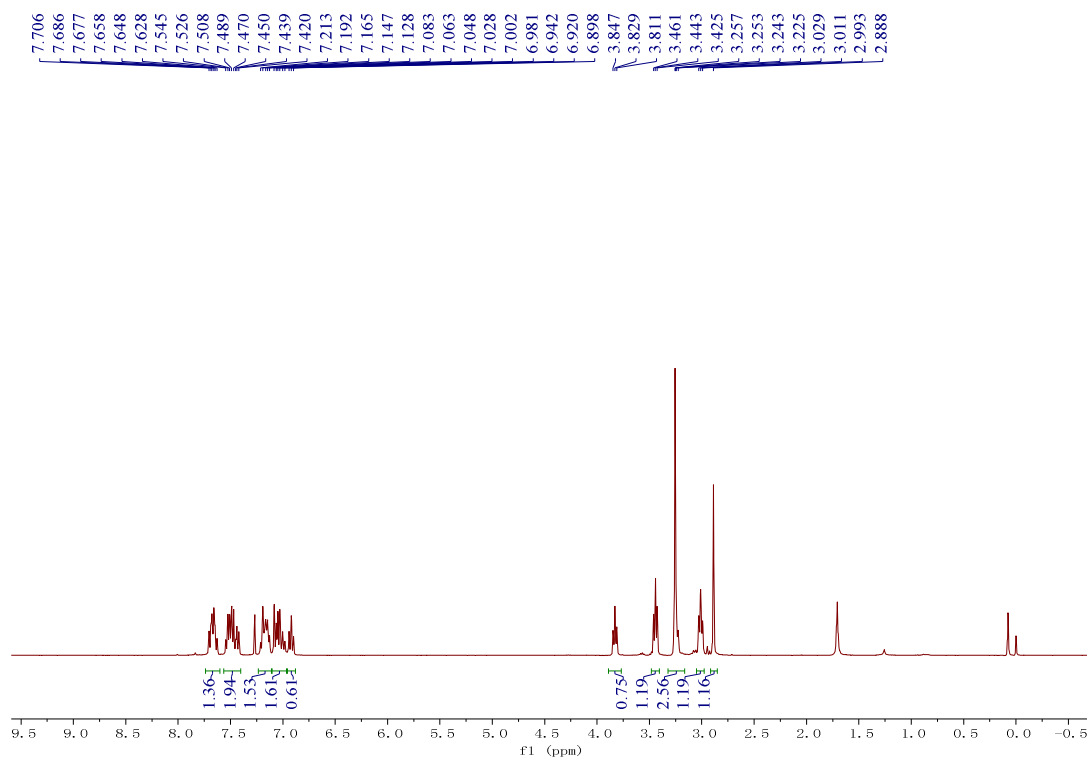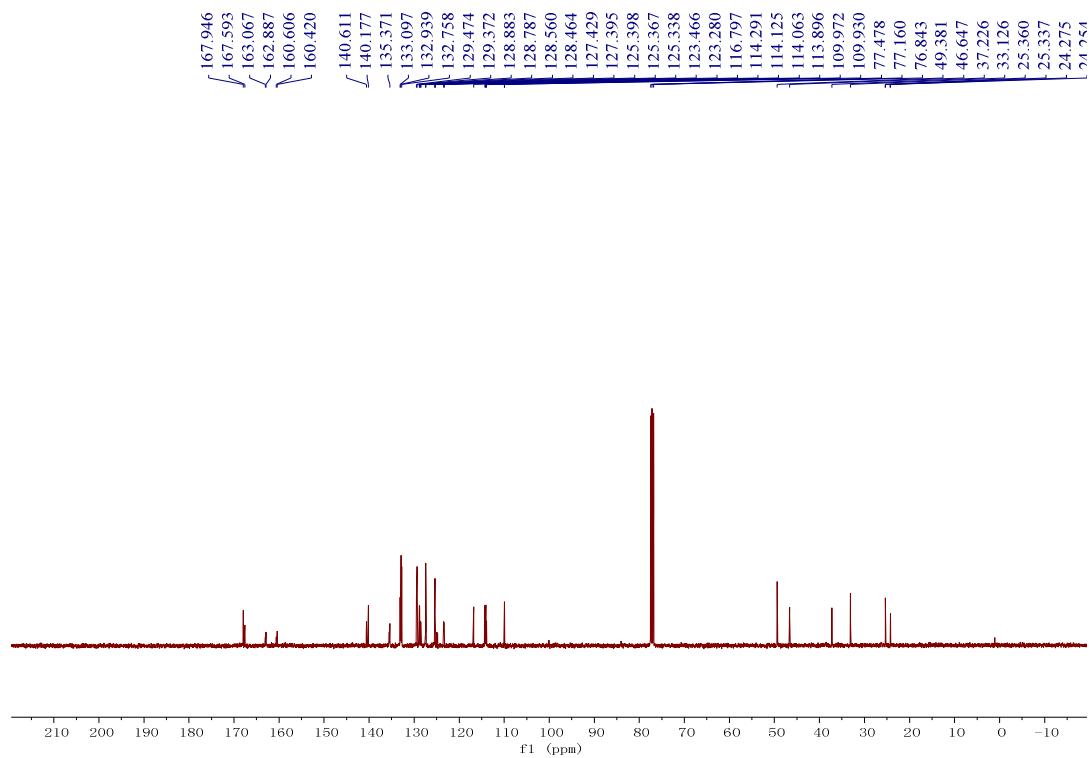

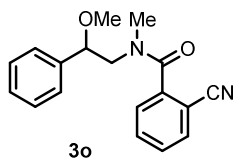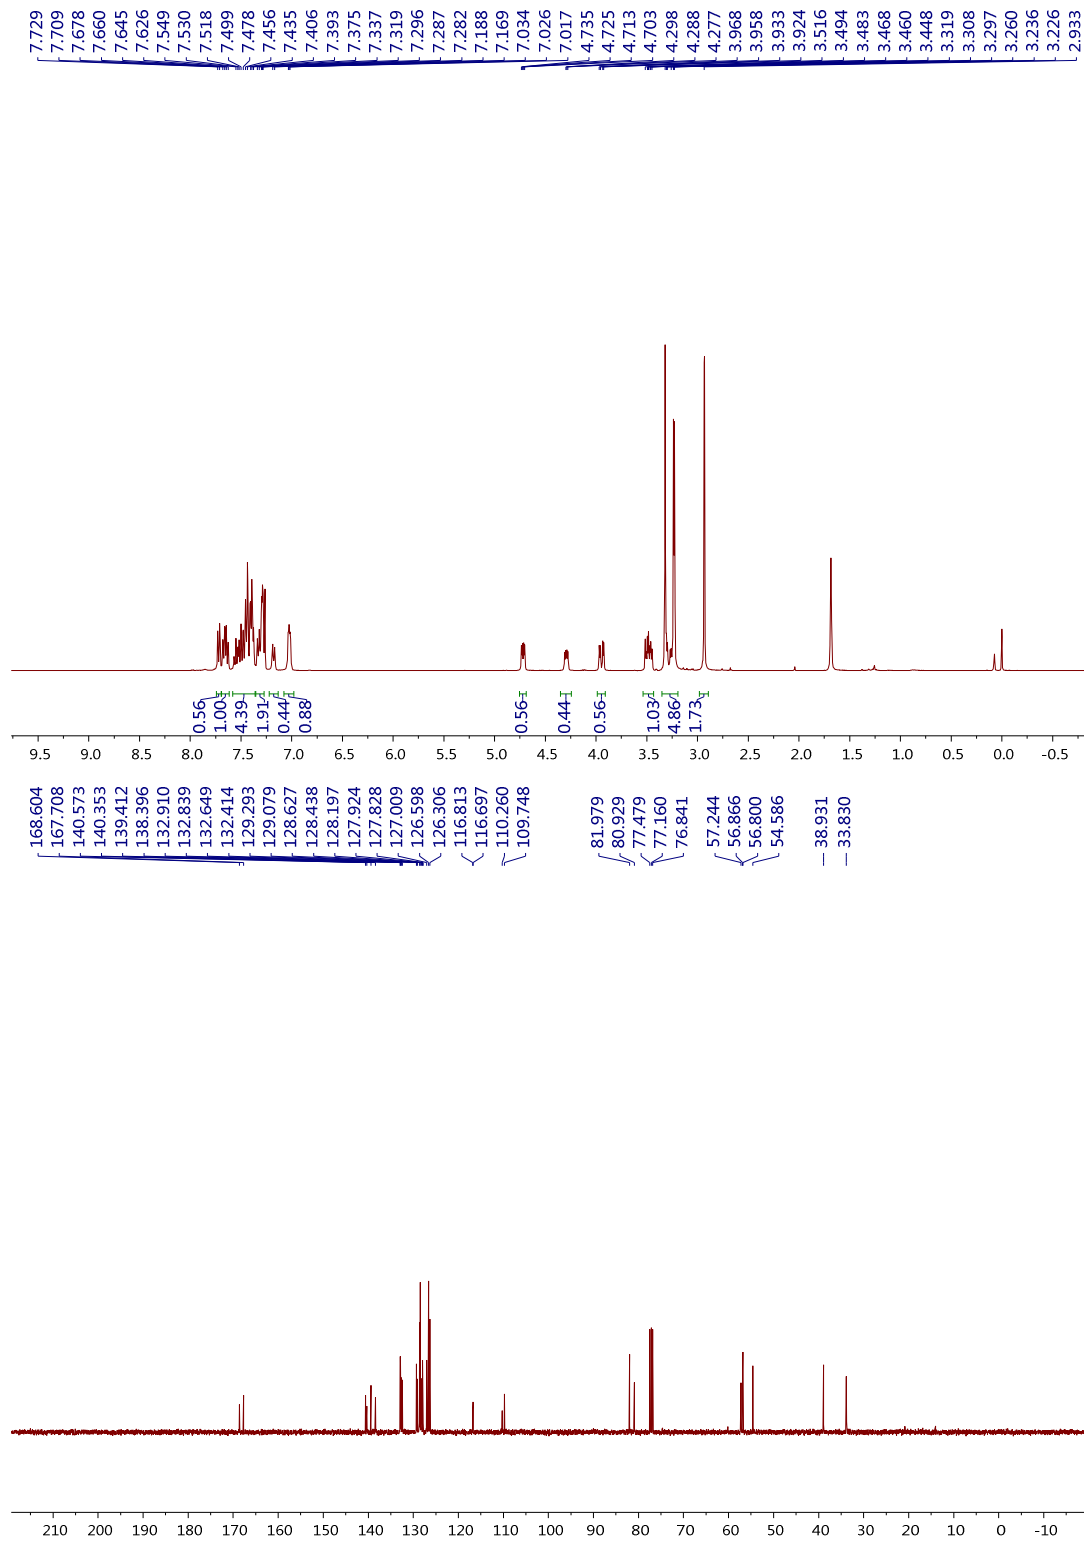

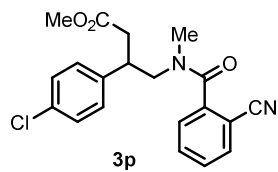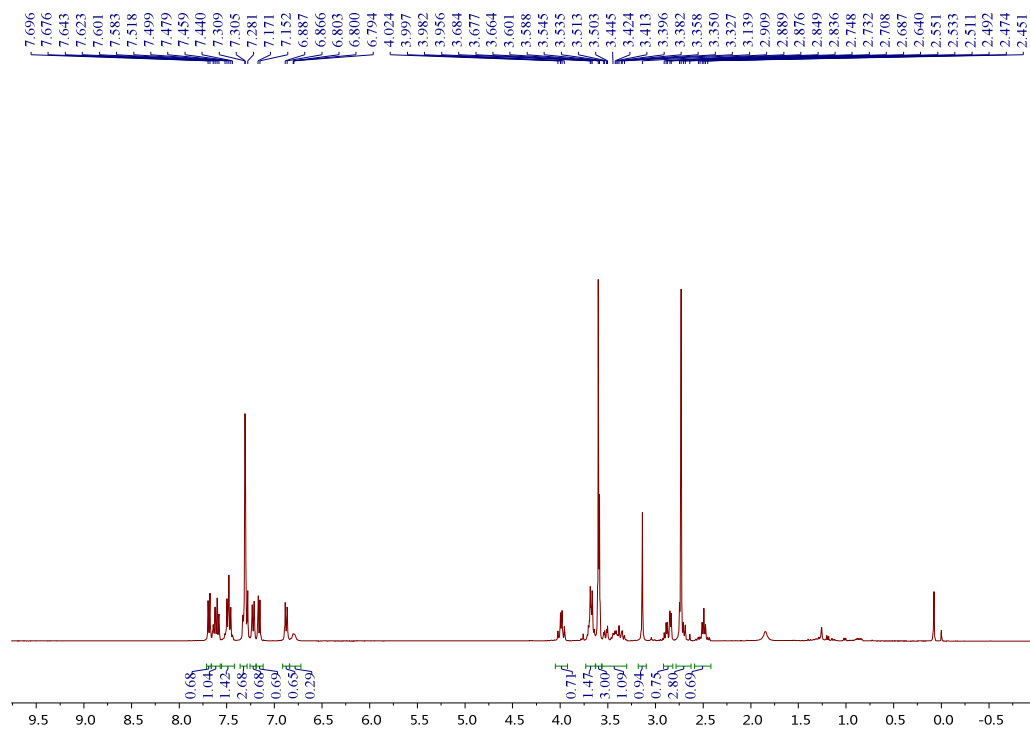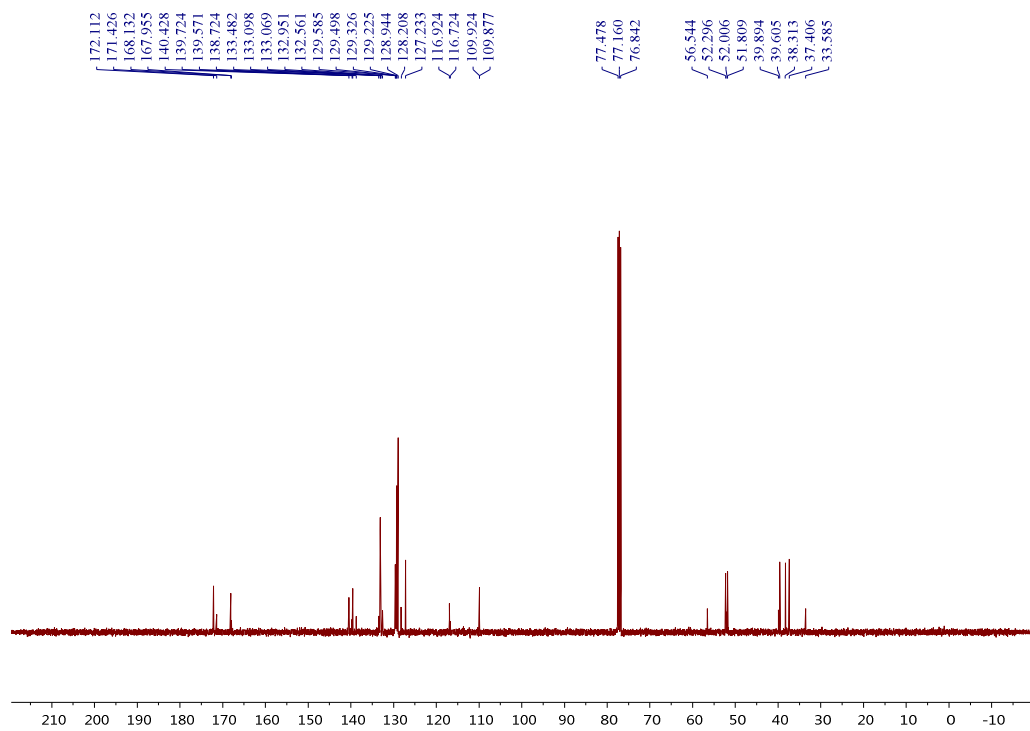

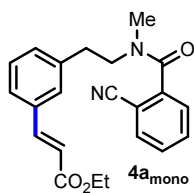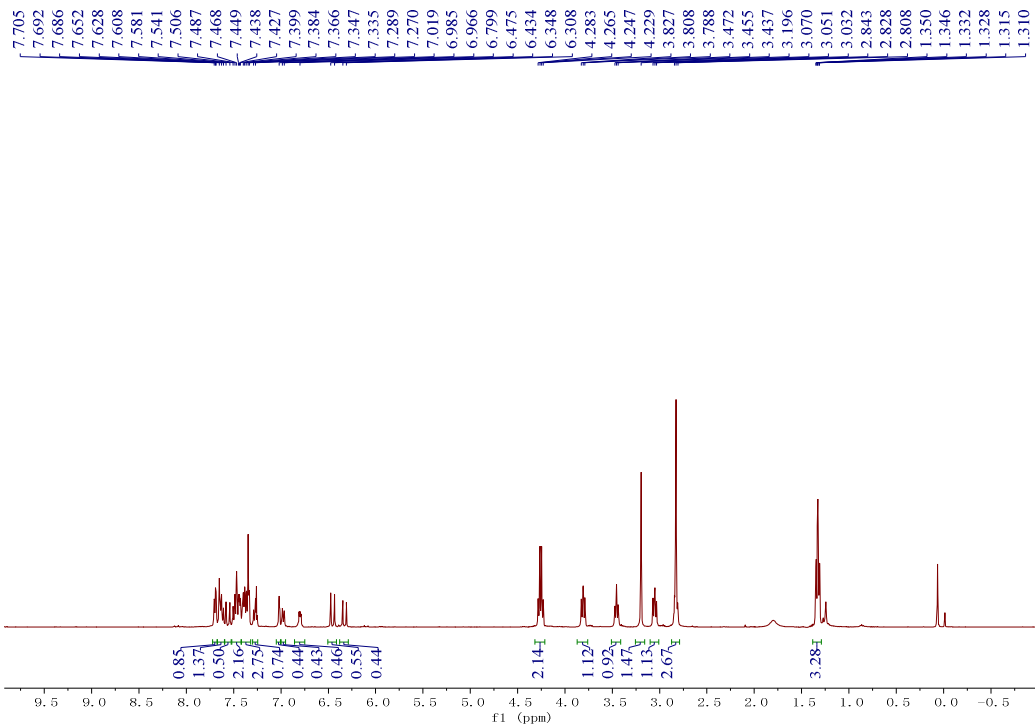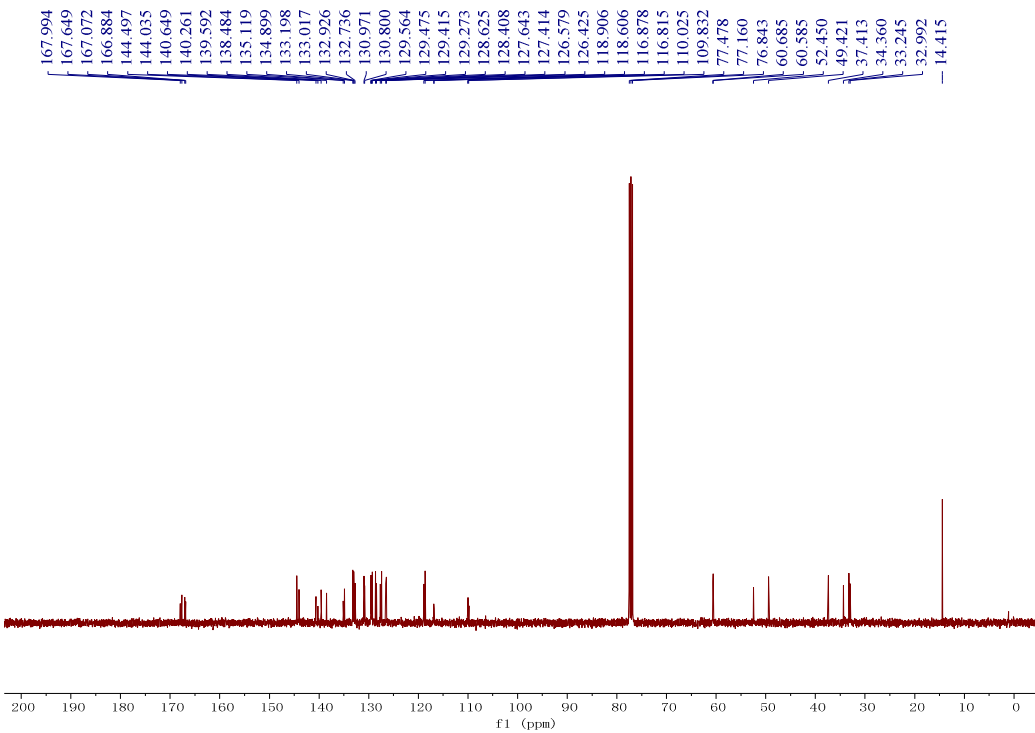

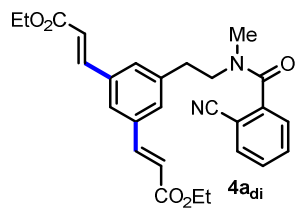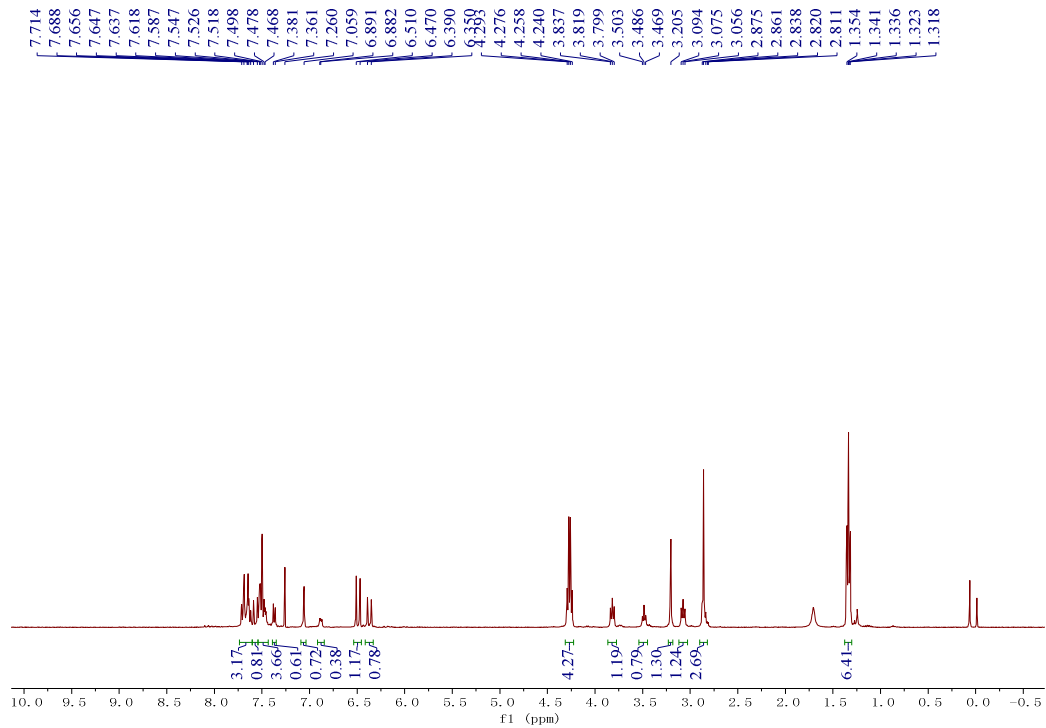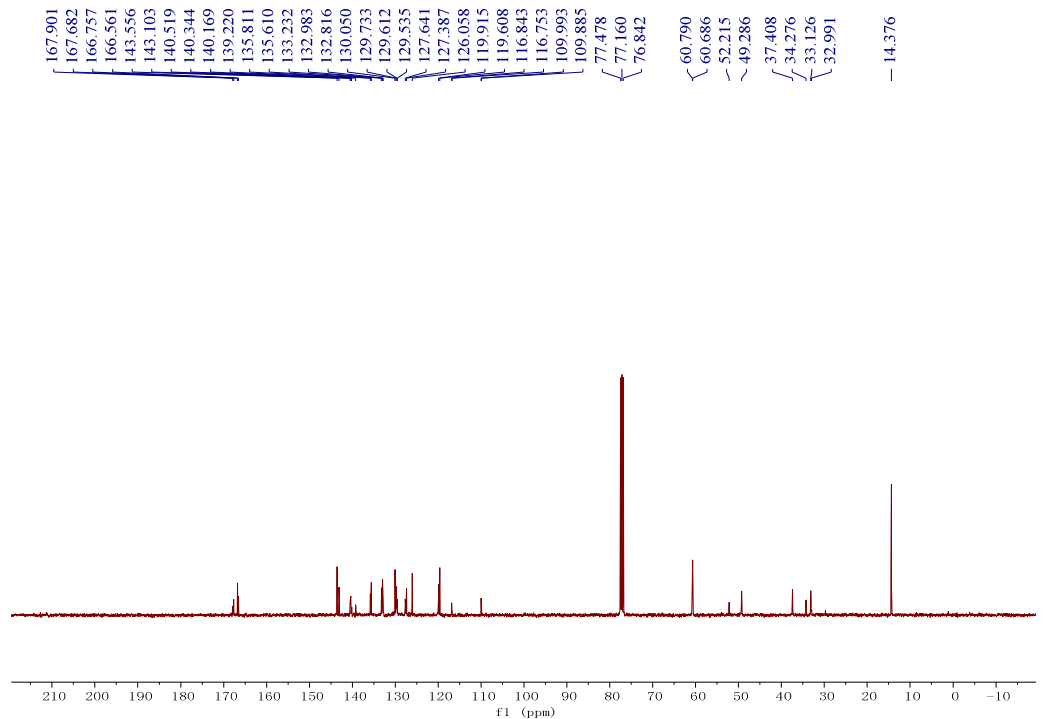

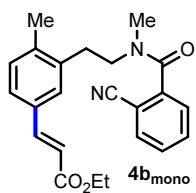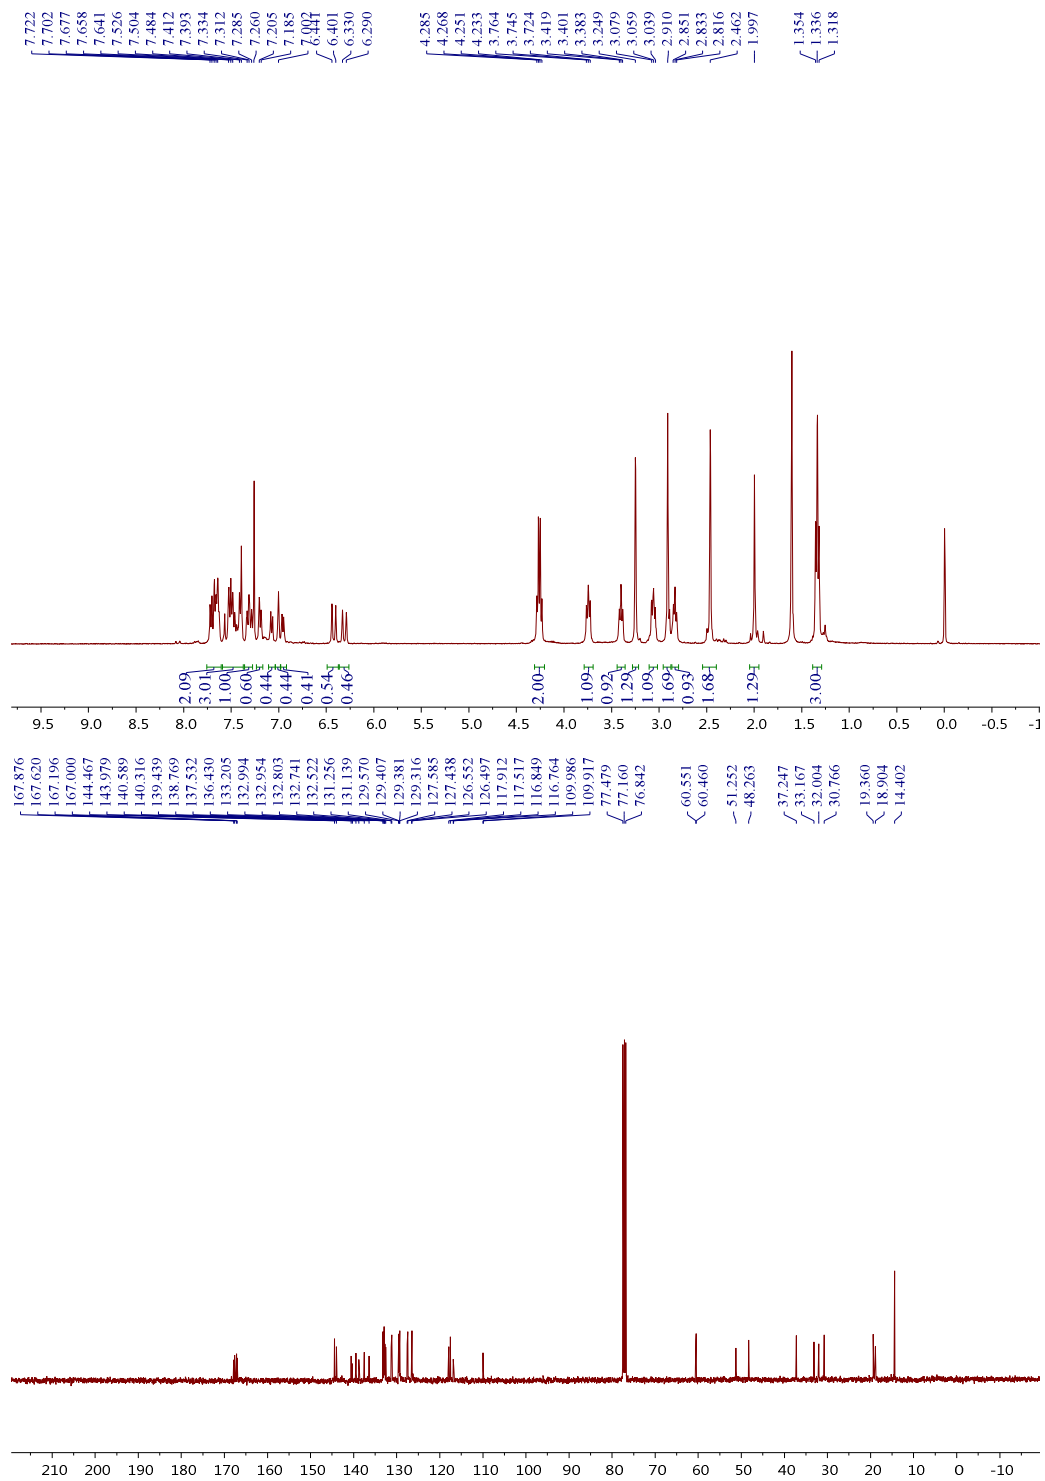



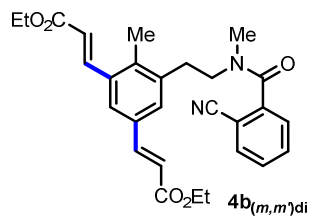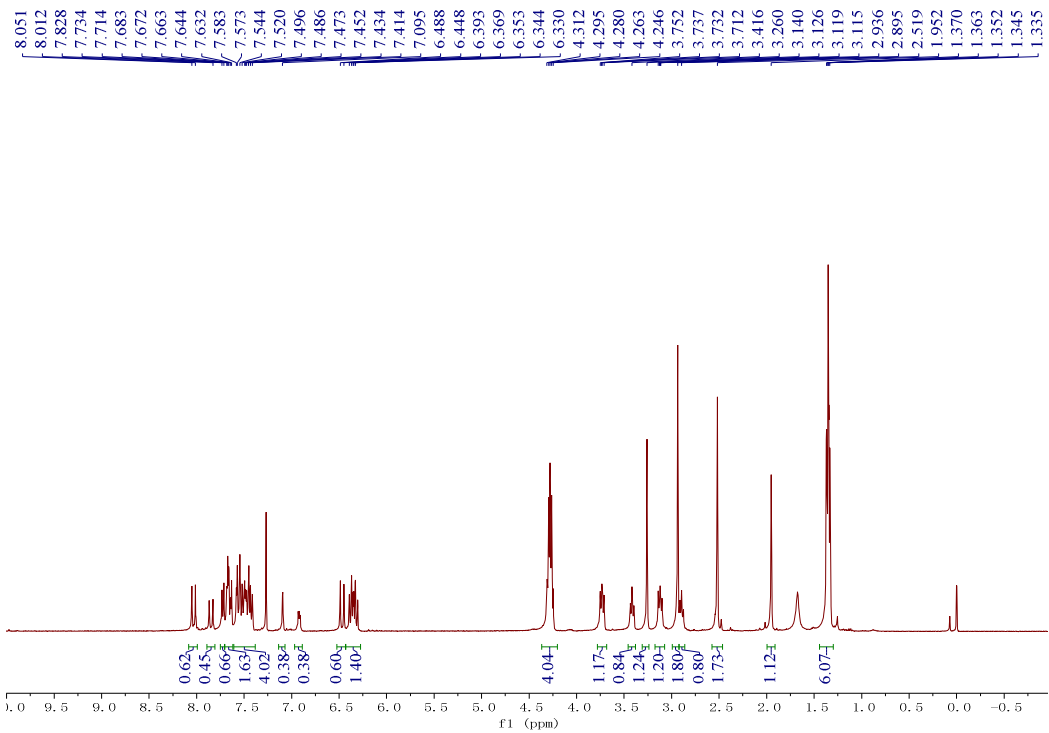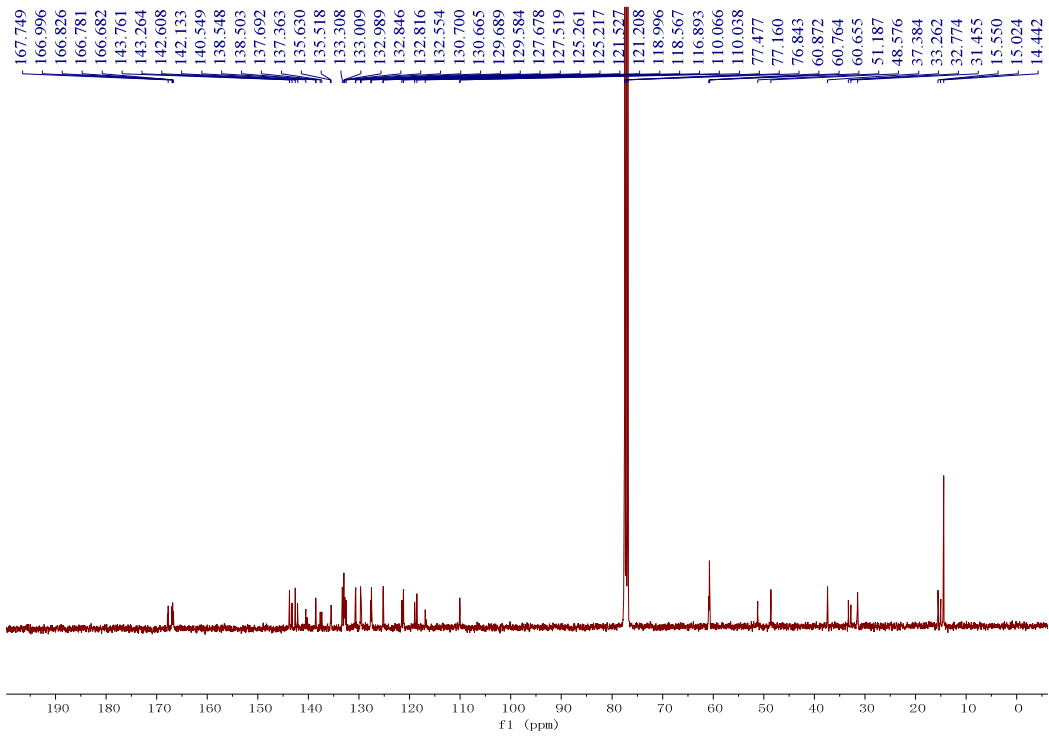

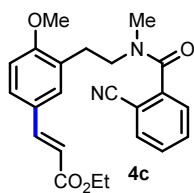

7.689  
7.670  
7.645  
7.627  
7.604  
7.585  
7.555  
7.515  
7.486  
7.468  
7.452  
7.430  
7.410  
7.398  
7.378  
7.361  
7.323  
7.304  
7.078  
6.896  
6.877  
6.867  
6.846  
6.745  
6.724  
6.351  
6.311  
6.241  
6.201  
4.264  
4.247  
4.229  
4.211  
3.887  
3.812  
3.794  
3.775  
3.603  
3.441  
3.423  
3.406  
3.200  
3.050  
3.032  
3.014  
2.848  
2.823  
2.810  
2.792  
1.336  
1.319  
1.301

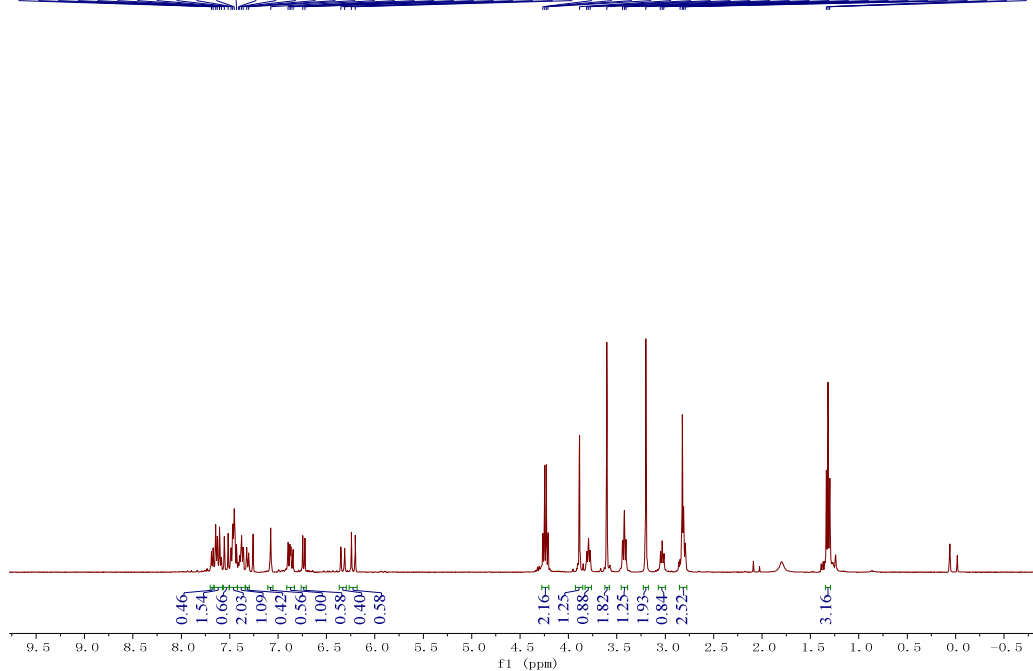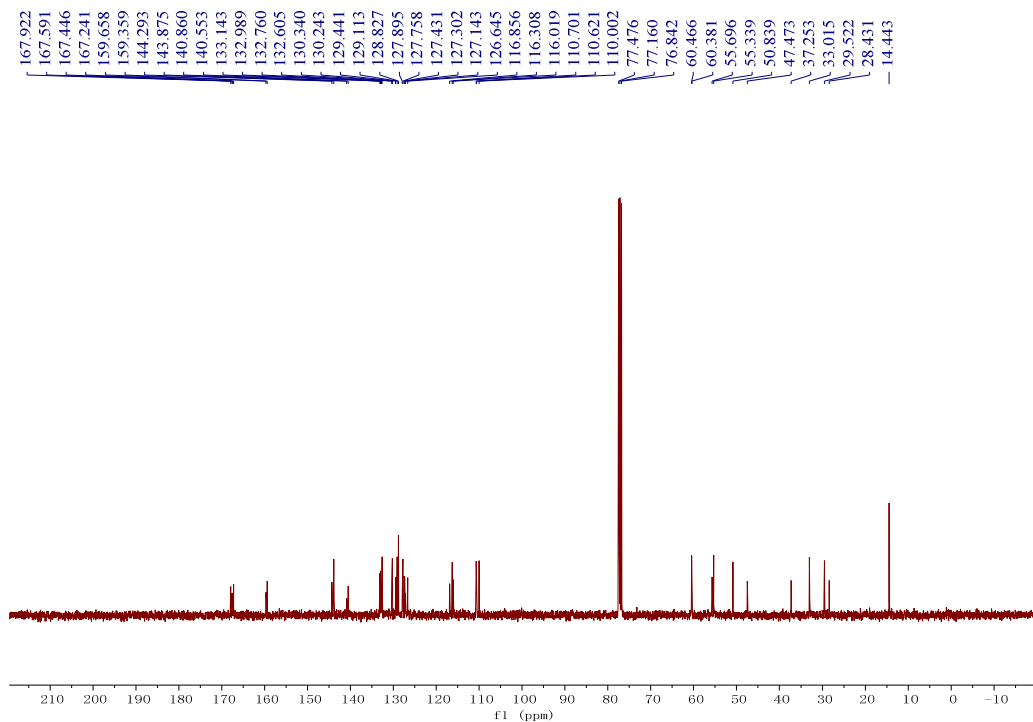

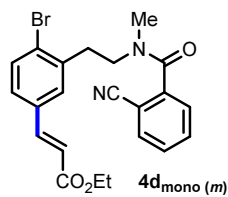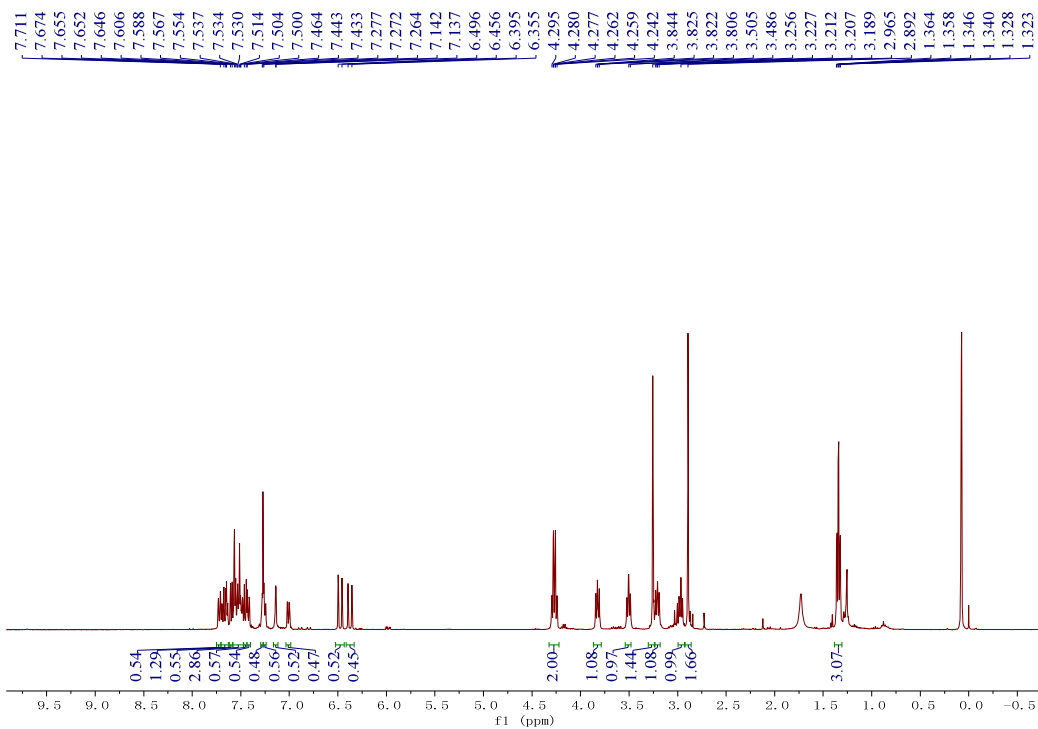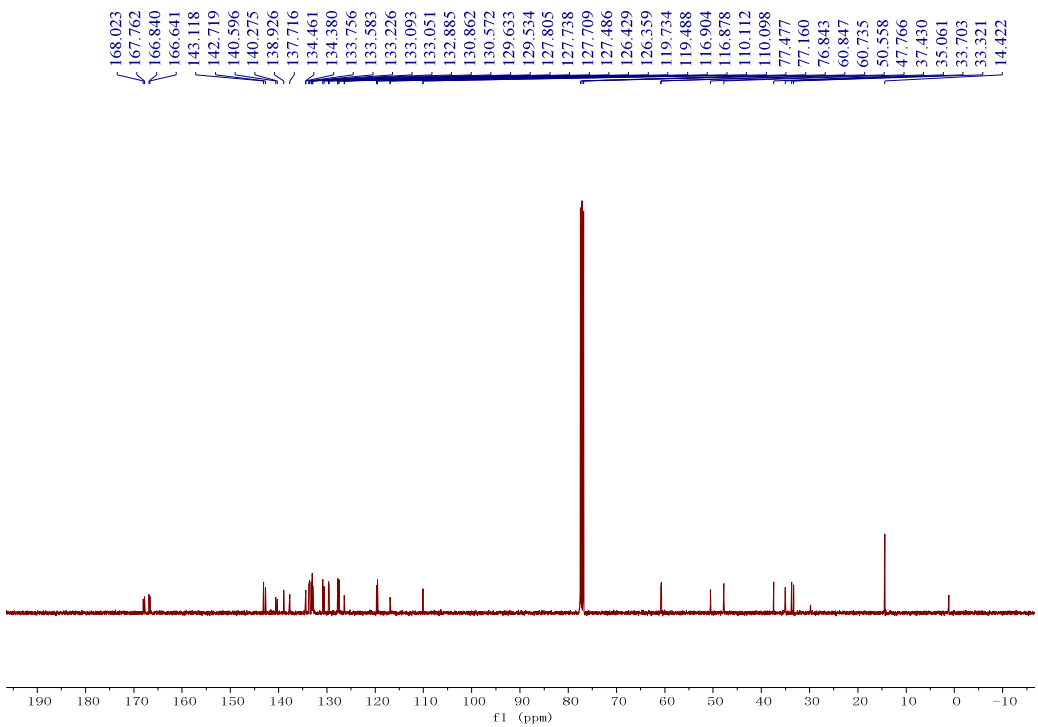

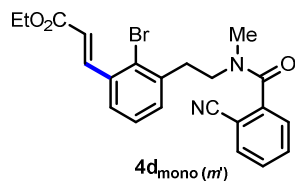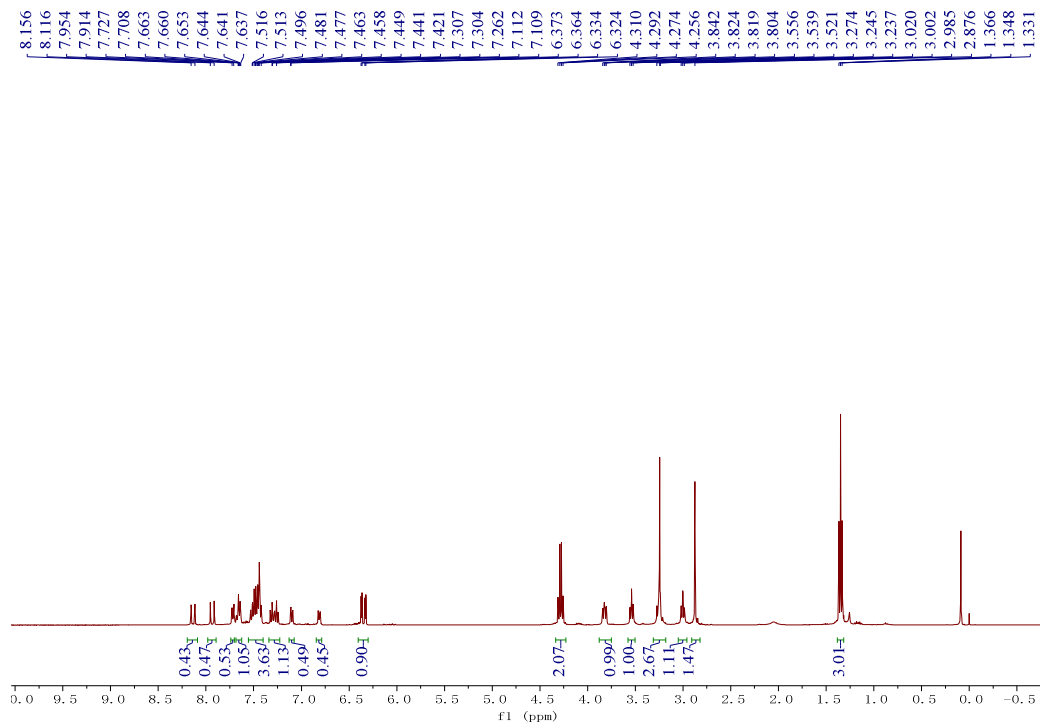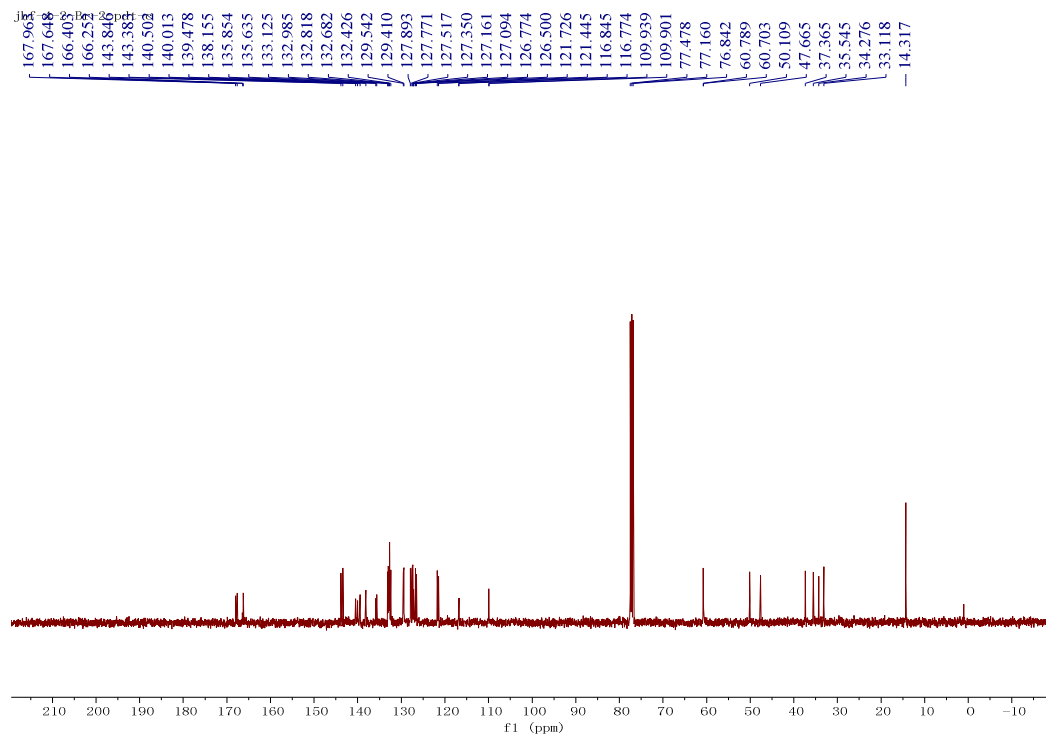

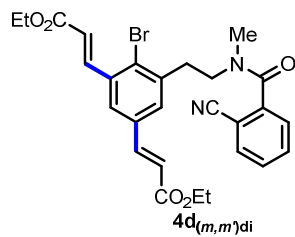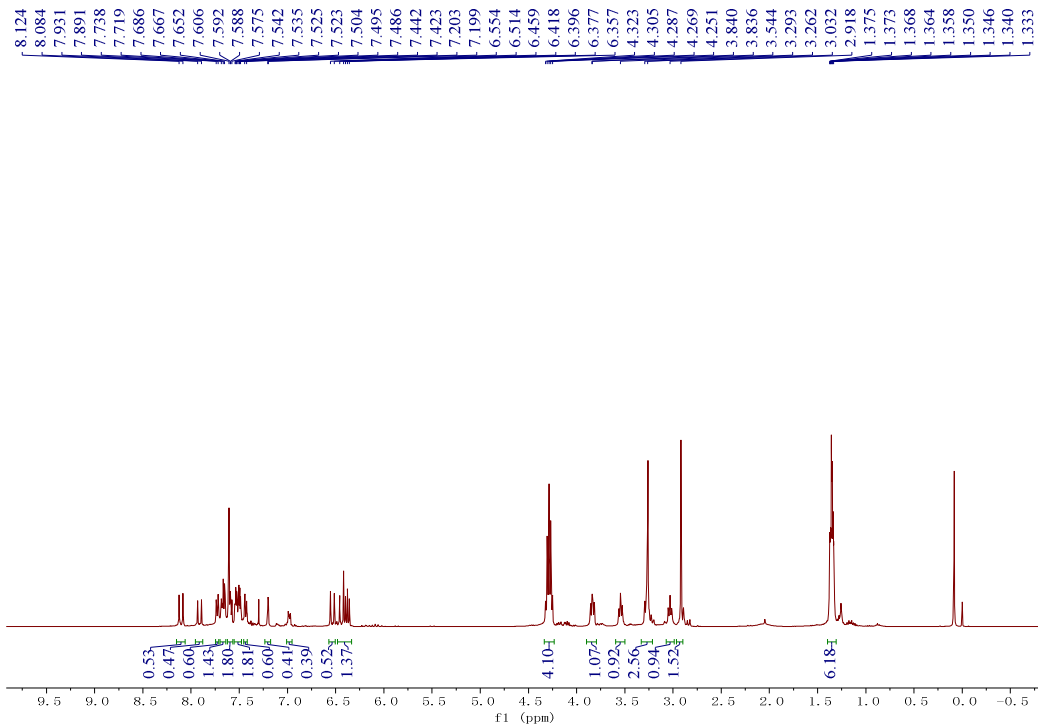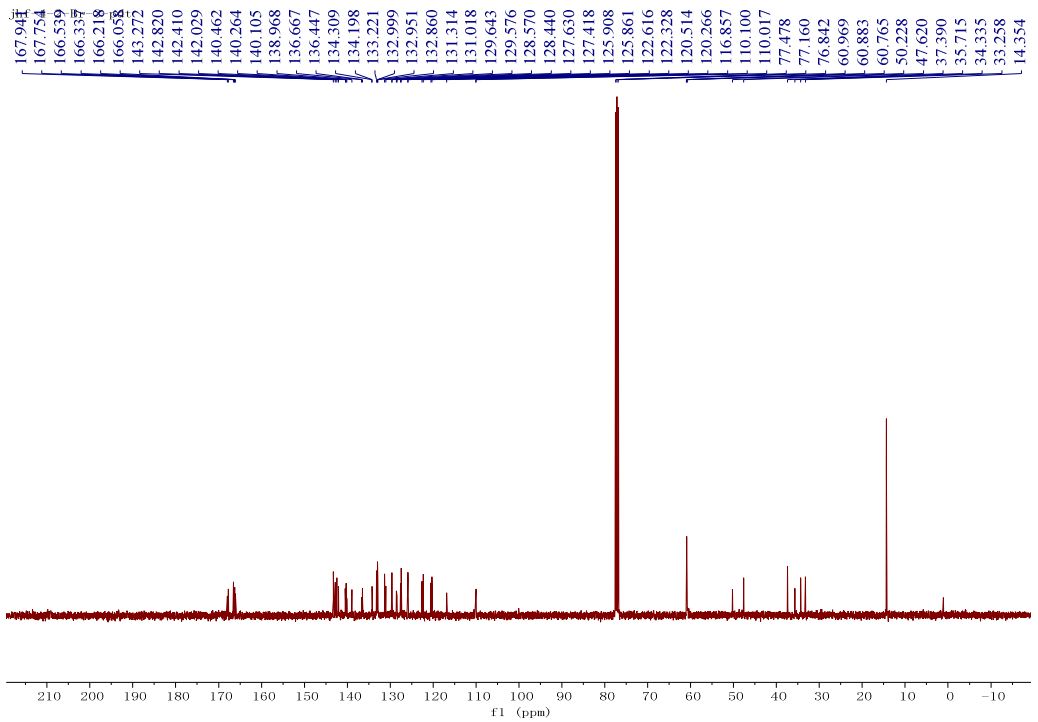

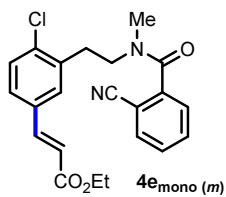

7.728  
7.709  
7.673  
7.658  
7.651  
7.618  
7.569  
7.526  
7.510  
7.501  
7.482  
7.422  
7.404  
7.385  
7.368  
7.364  
7.337  
7.333  
7.277  
7.269  
7.267  
7.256  
7.154  
7.149  
7.024  
6.477  
6.437  
6.375  
6.335  
4.298  
4.280  
4.262  
4.244  
3.850  
3.833  
3.828  
3.813  
3.511  
3.494  
3.475  
3.248  
3.219  
3.204  
3.199  
3.182  
2.978  
2.960  
2.942  
2.880  
1.361  
1.343  
1.325

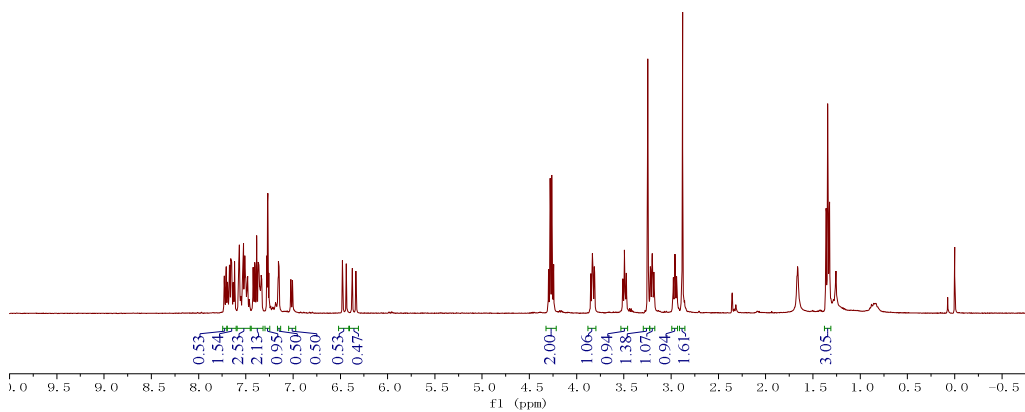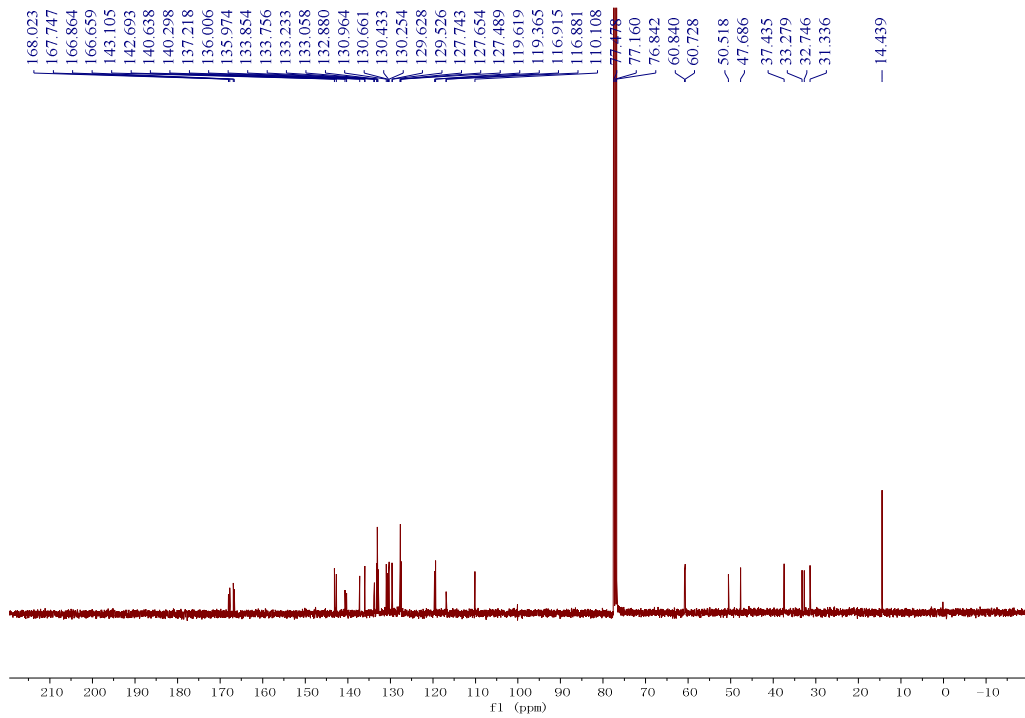

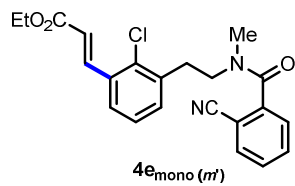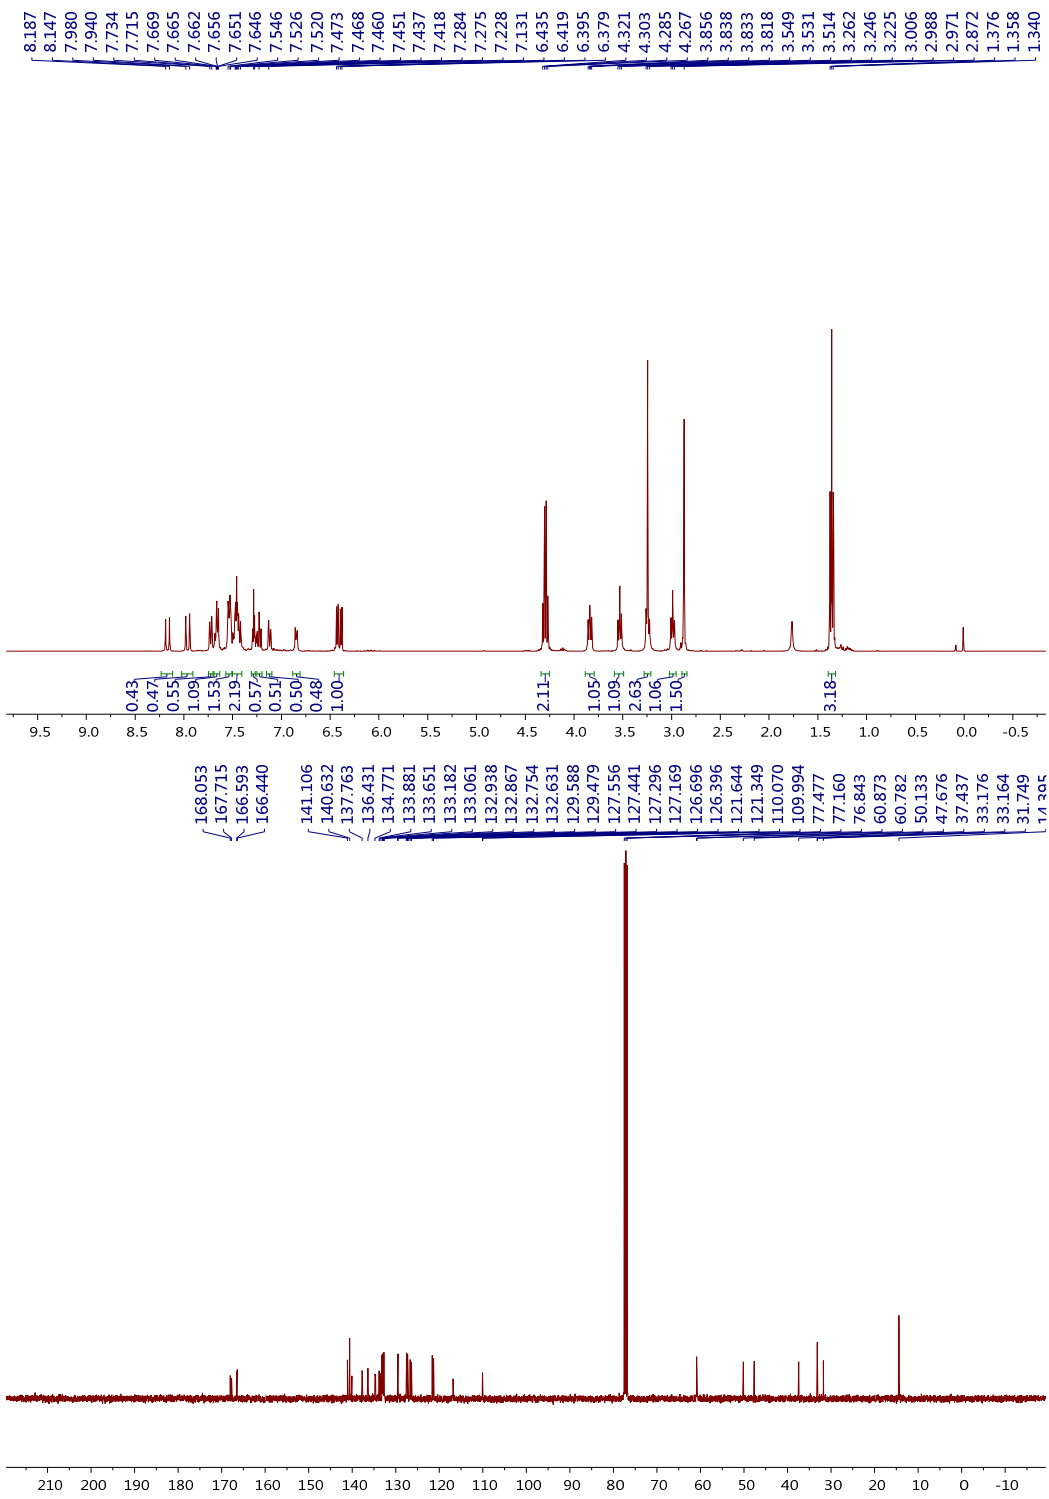

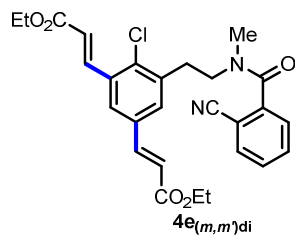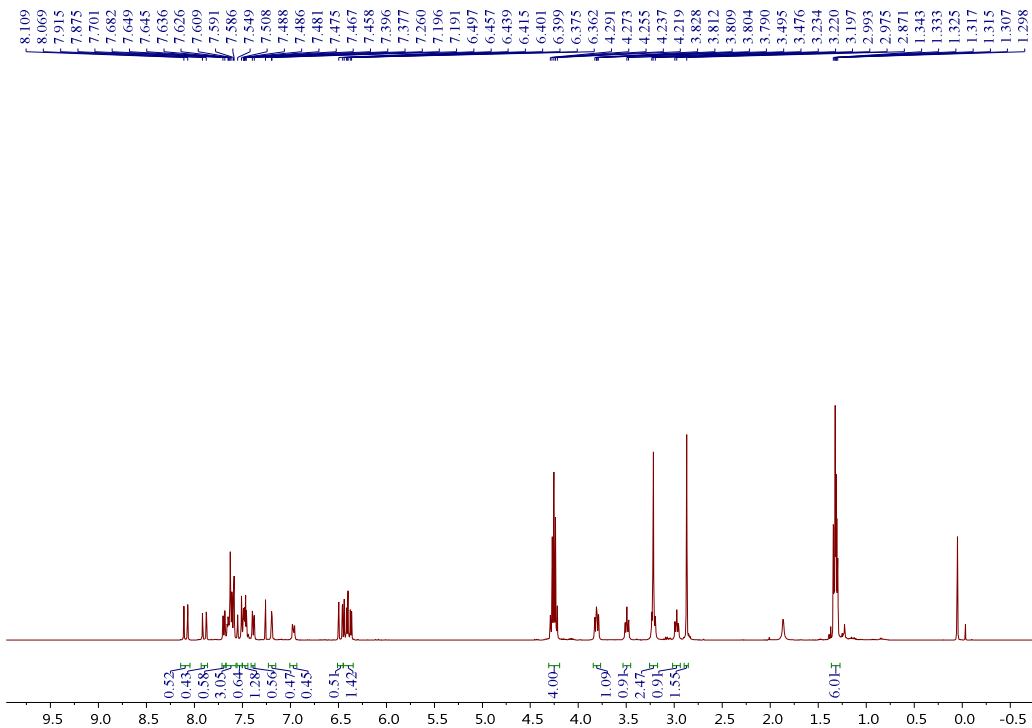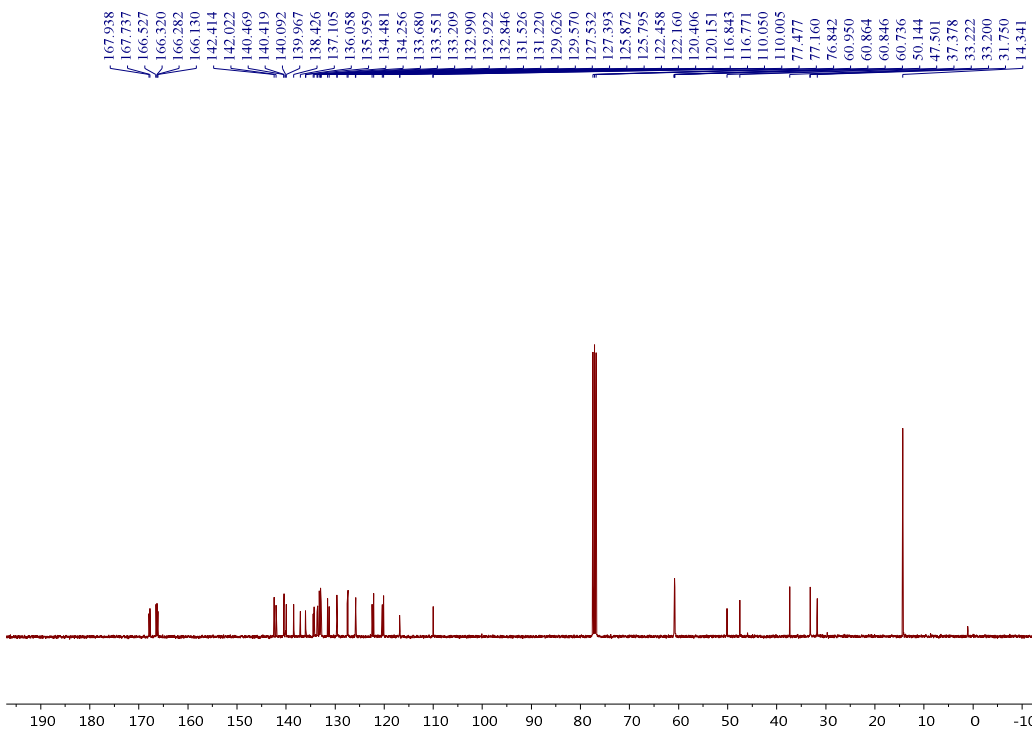



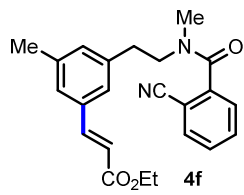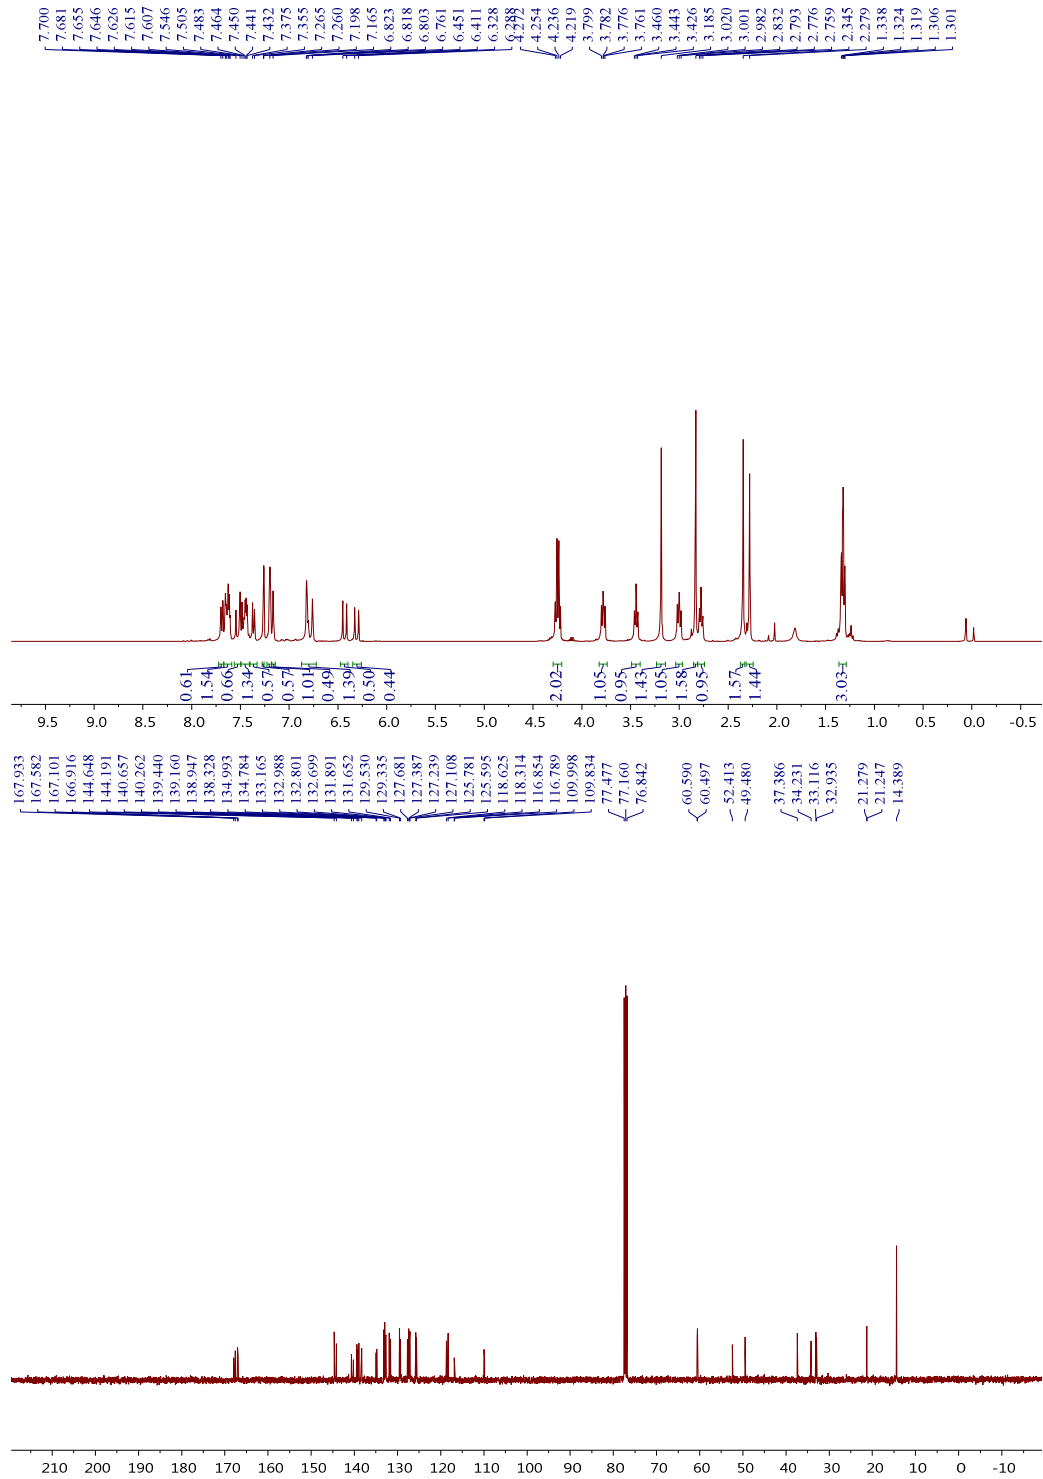

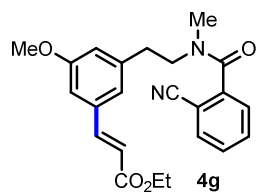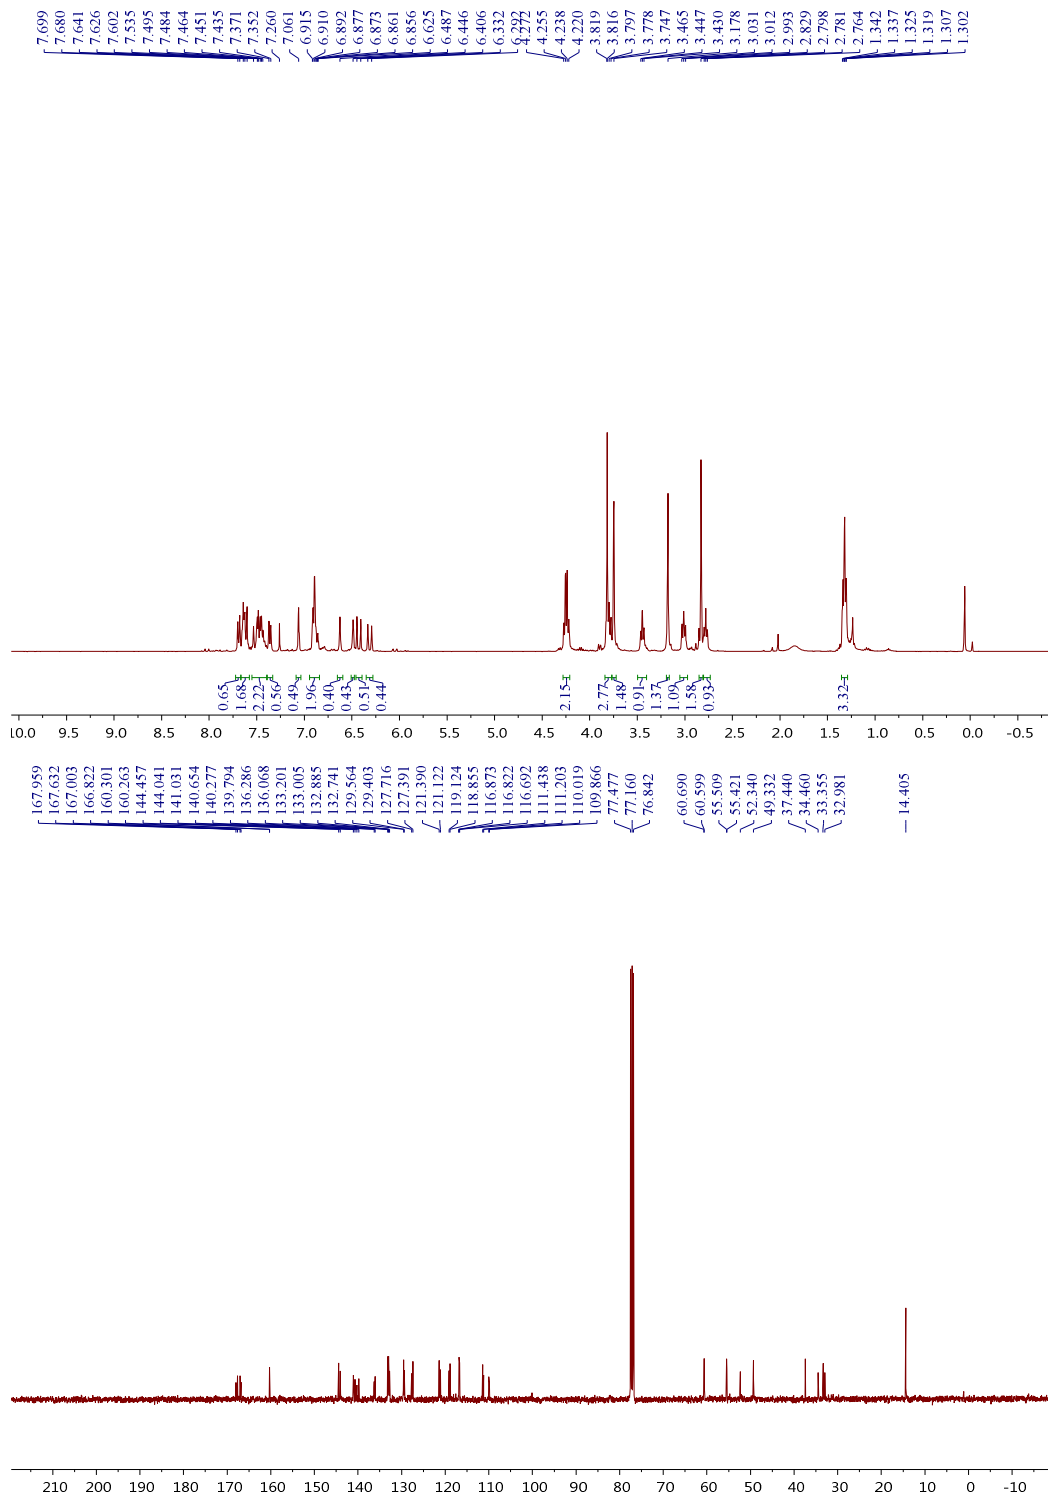

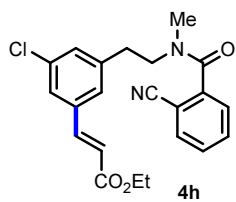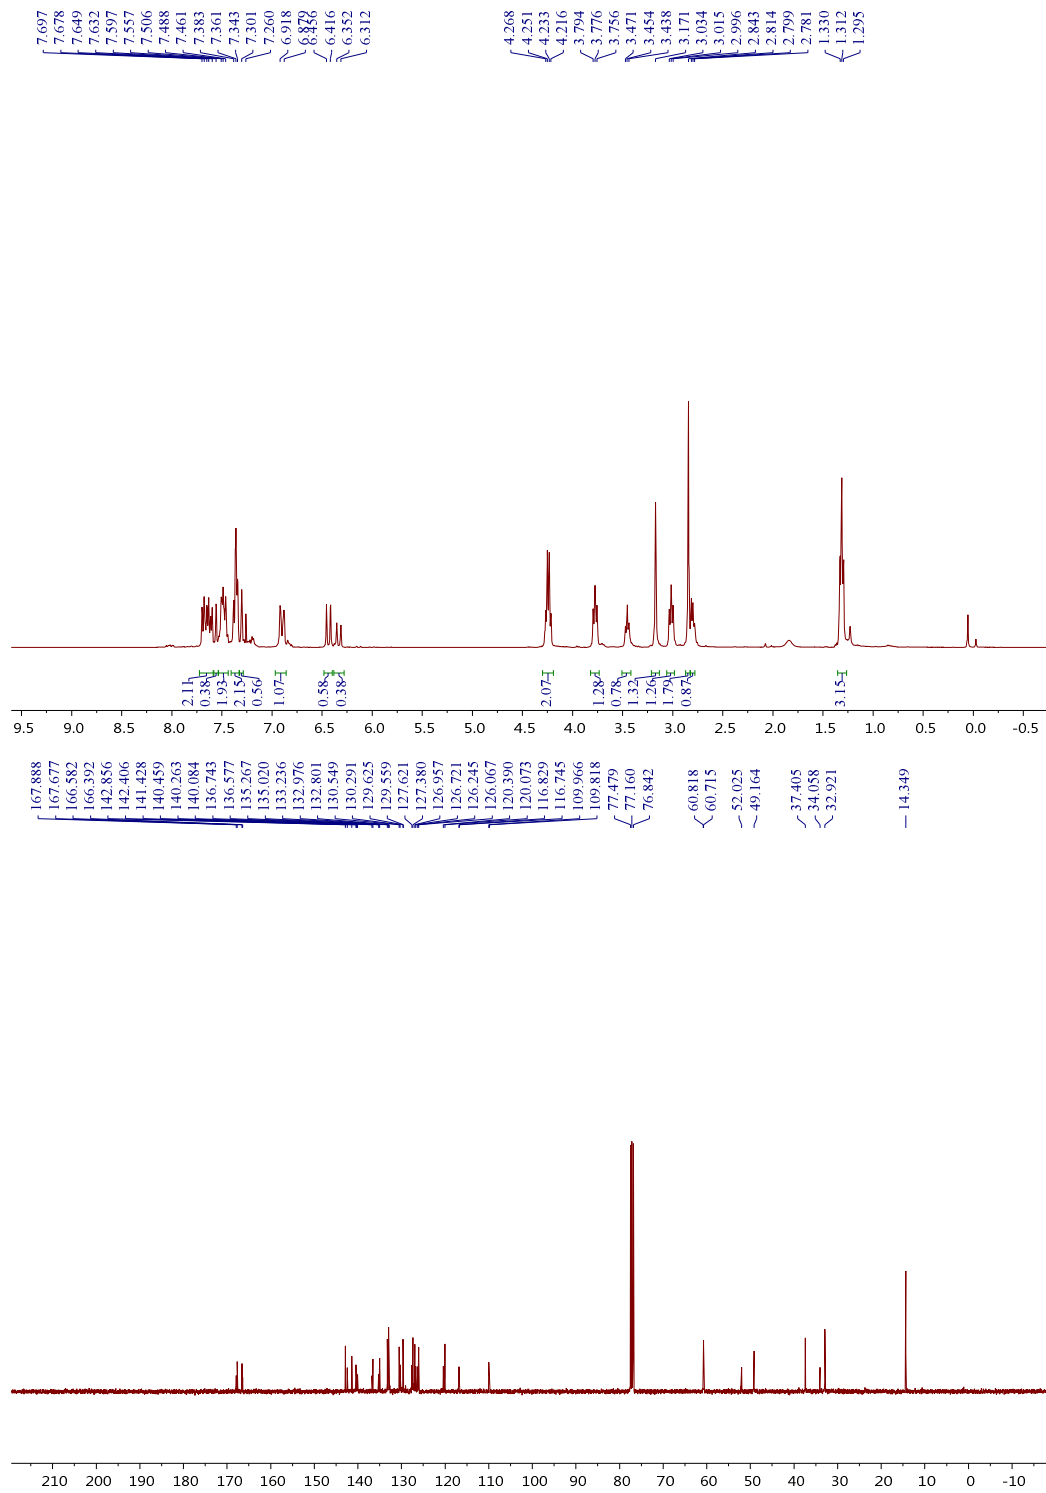

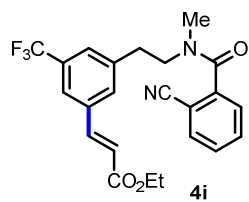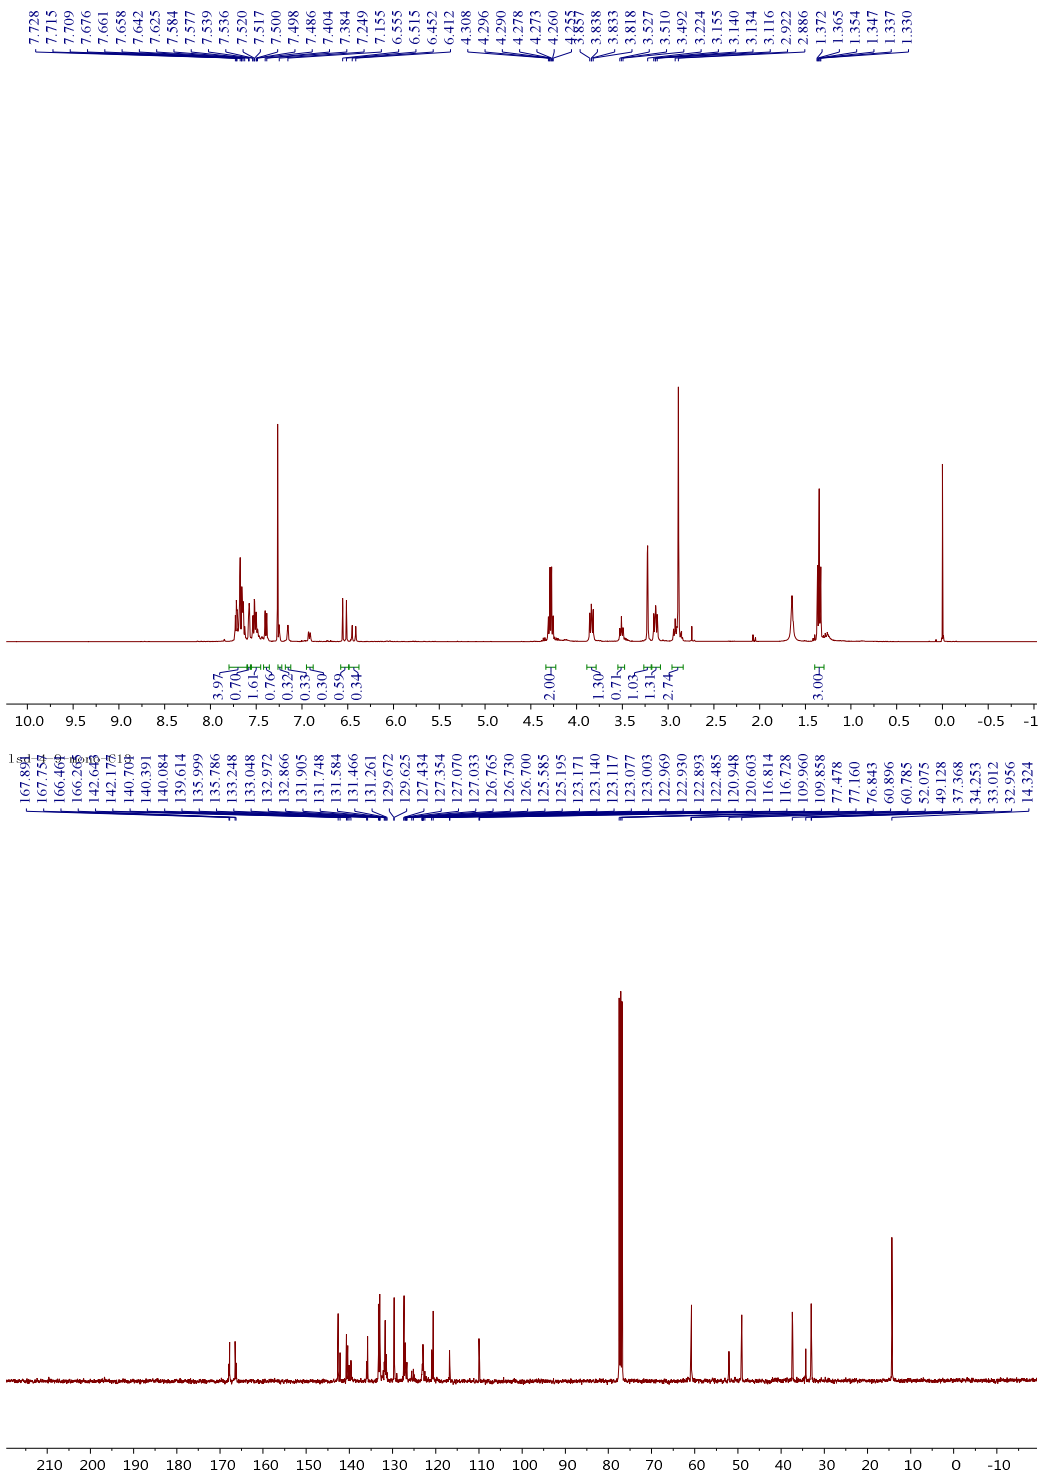

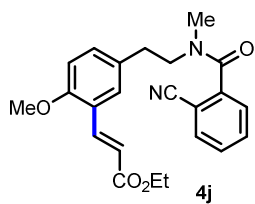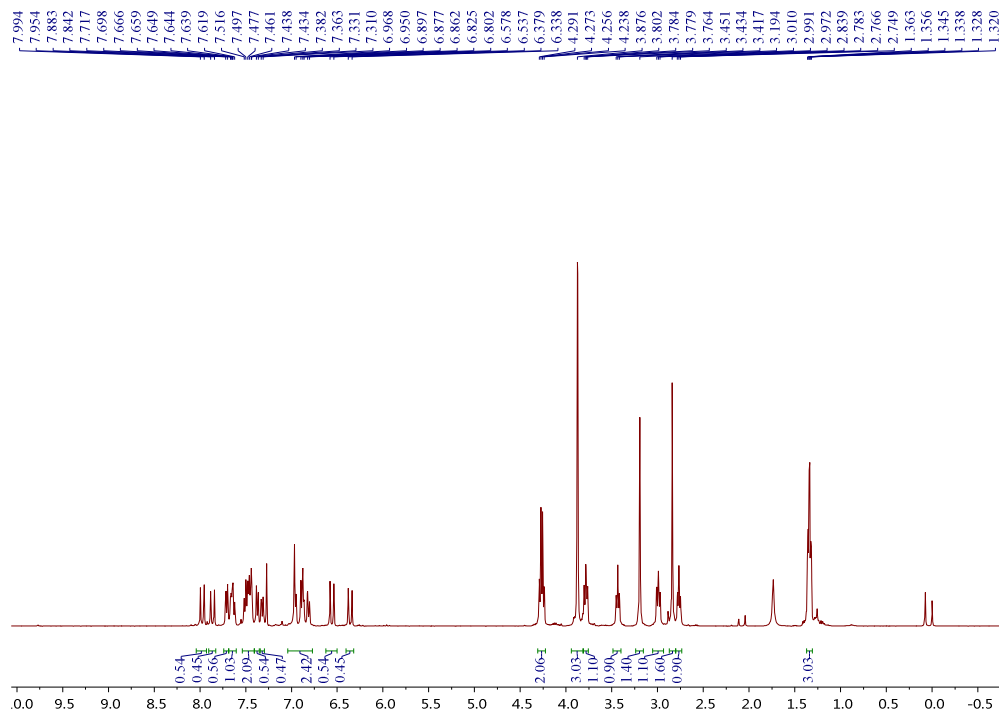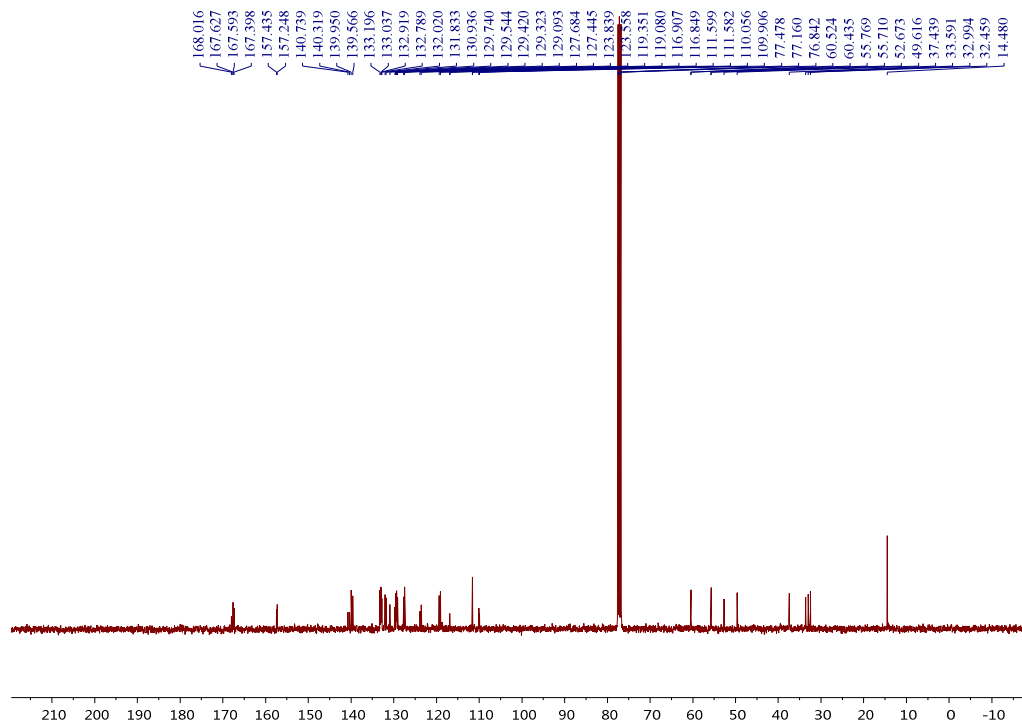

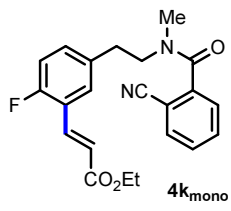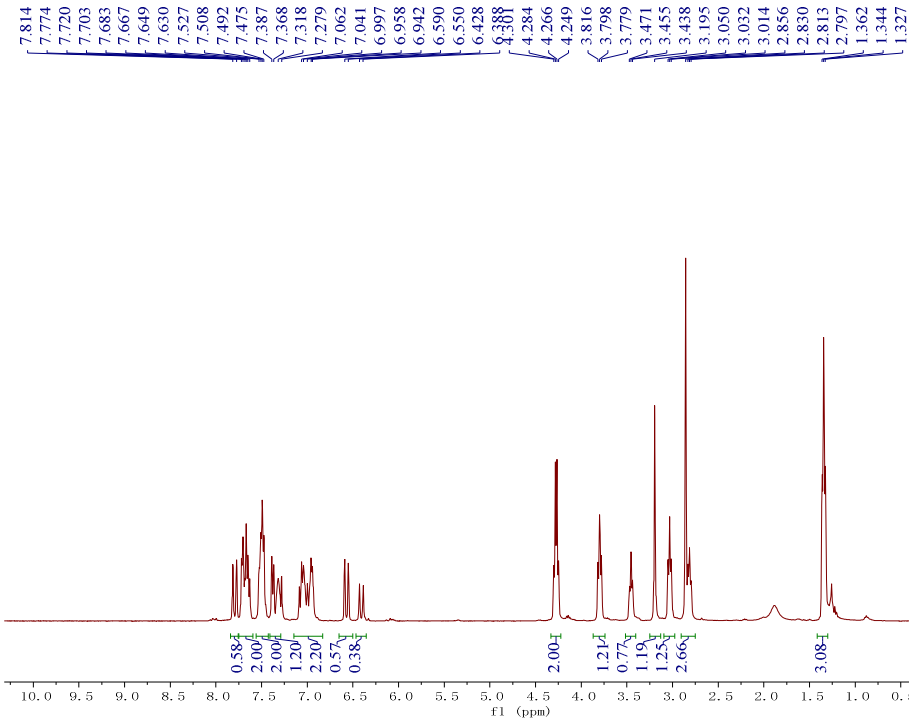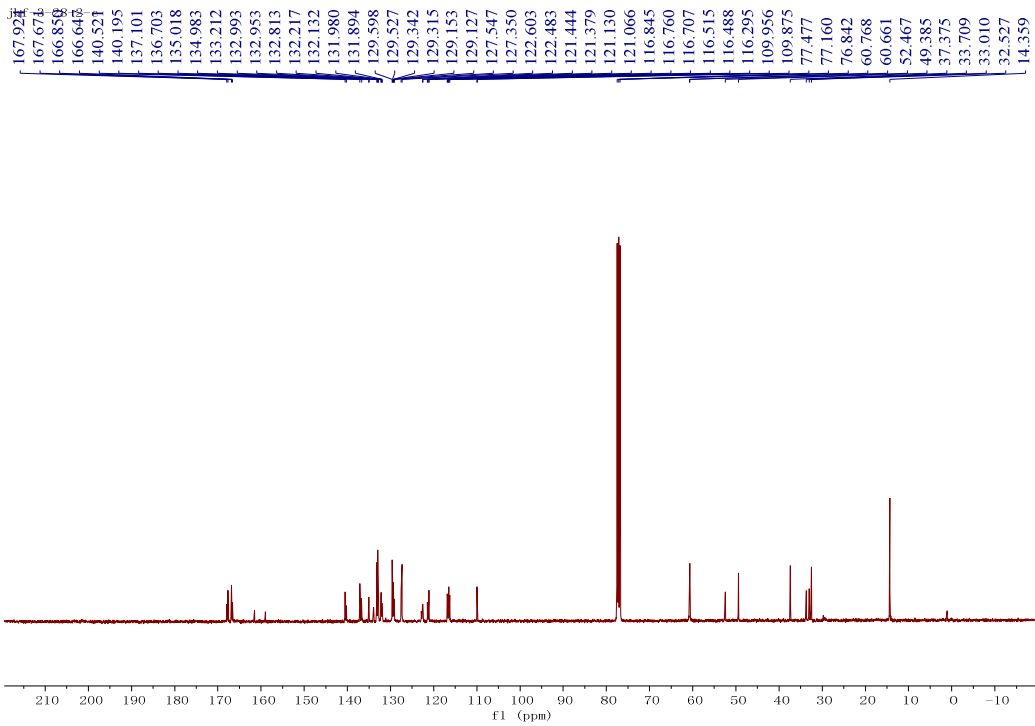

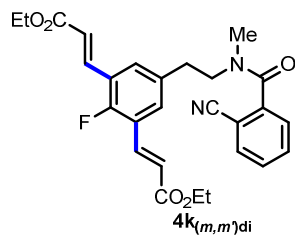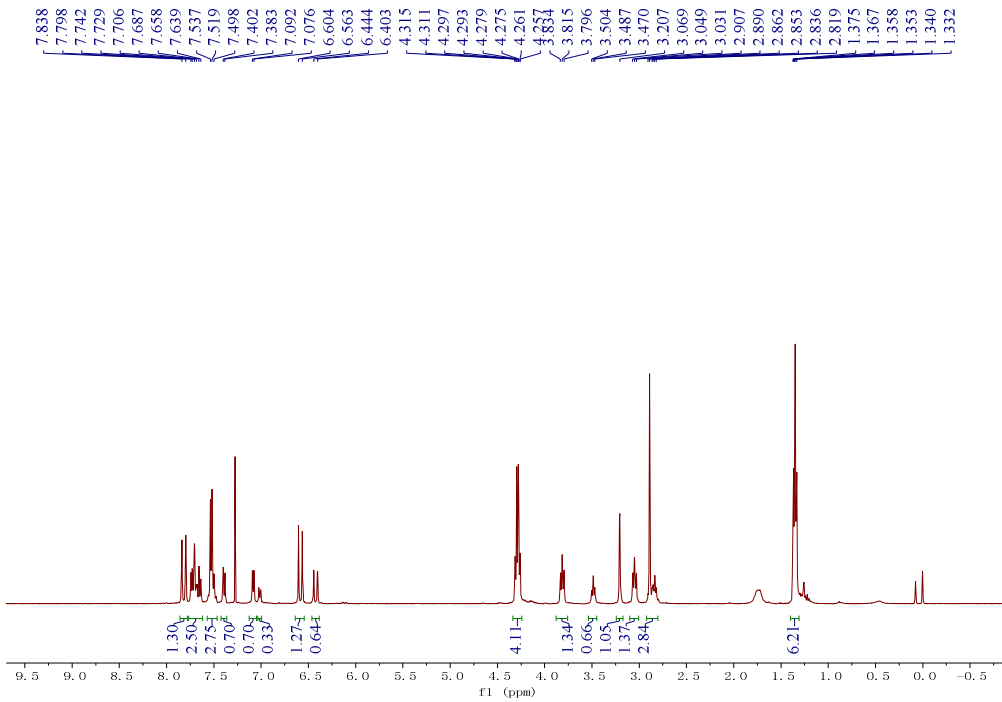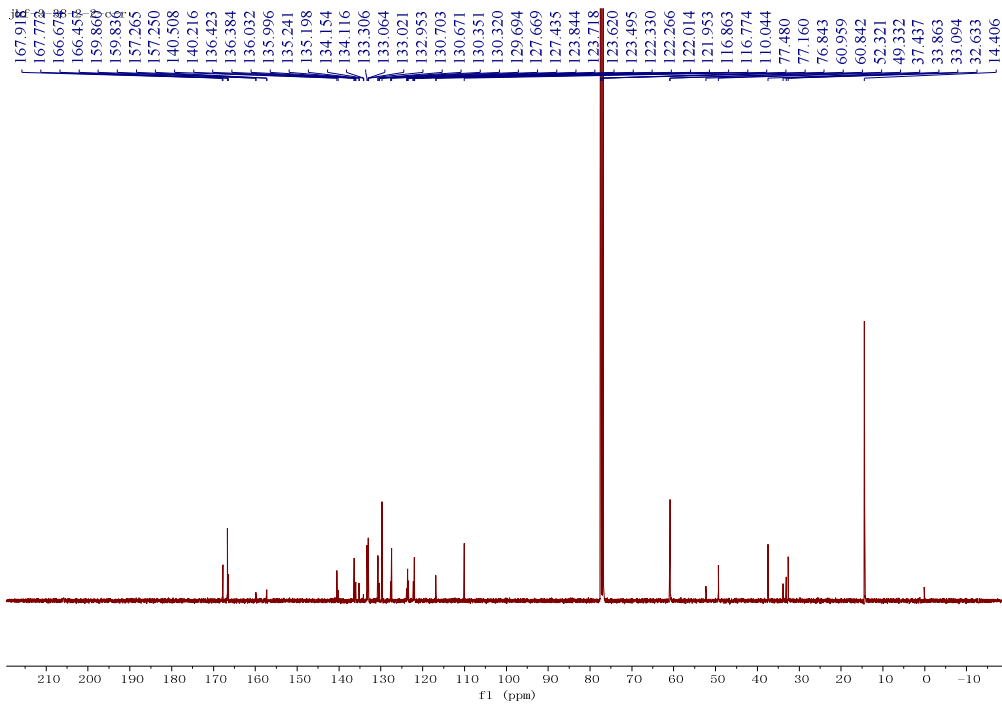

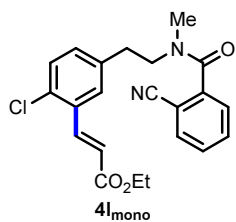

8.084  
8.044  
8.013  
7.973  
7.721  
7.702  
7.652  
7.633  
7.579  
7.530  
7.511  
7.491  
7.469  
7.386  
7.364  
7.297  
7.284  
7.126  
6.947  
6.926  
6.899  
6.511  
6.471  
6.262  
6.222  
4.309  
4.292  
4.275  
4.258  
3.824  
3.805  
3.786  
3.479  
3.462  
3.445  
3.198  
3.058  
3.039  
3.020  
2.861  
2.834  
2.818  
2.800  
1.374  
1.365  
1.356  
1.346  
1.330

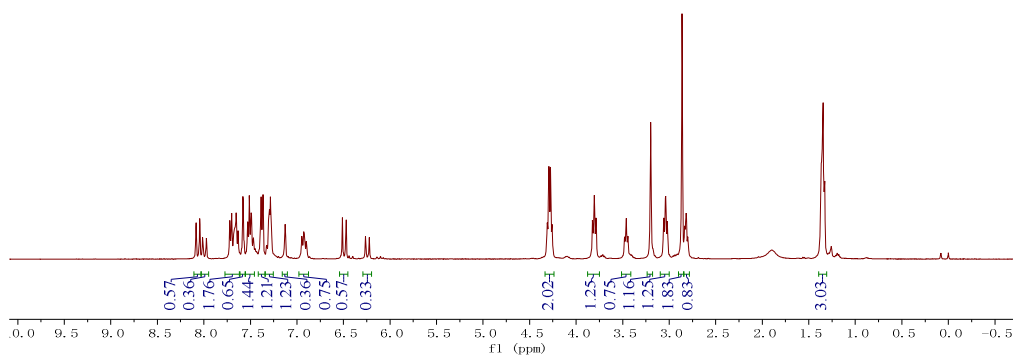

167.922  
167.695  
166.573  
166.323  
140.490  
140.244  
140.142  
139.883  
137.974  
136.906  
133.455  
133.233  
133.151  
133.122  
132.998  
132.851  
132.798  
131.713  
131.447  
130.541  
130.375  
129.628  
129.534  
128.120  
127.882  
127.582  
127.363  
121.439  
121.202  
116.842  
116.758  
109.968  
109.854  
77.478  
77.160  
76.840  
60.846  
60.739  
52.383  
49.219  
37.404  
33.965  
33.054  
32.746  
14.373

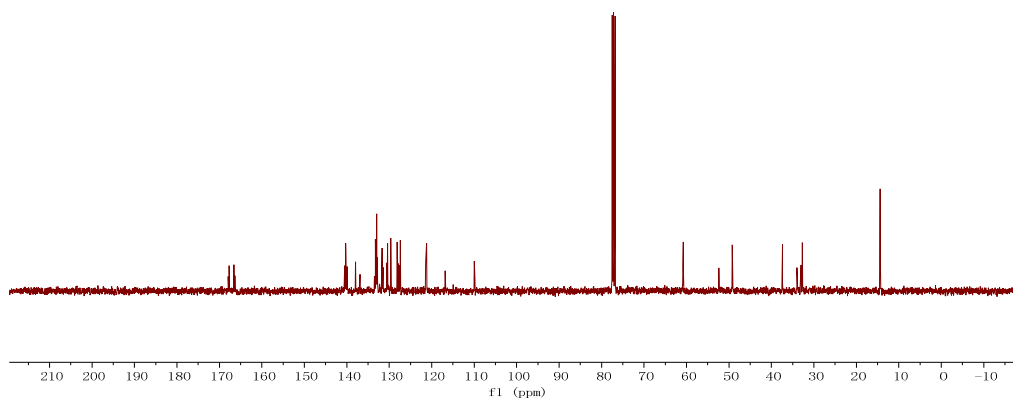



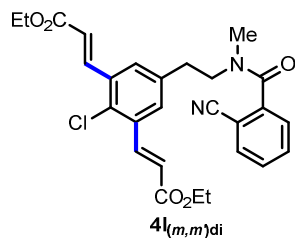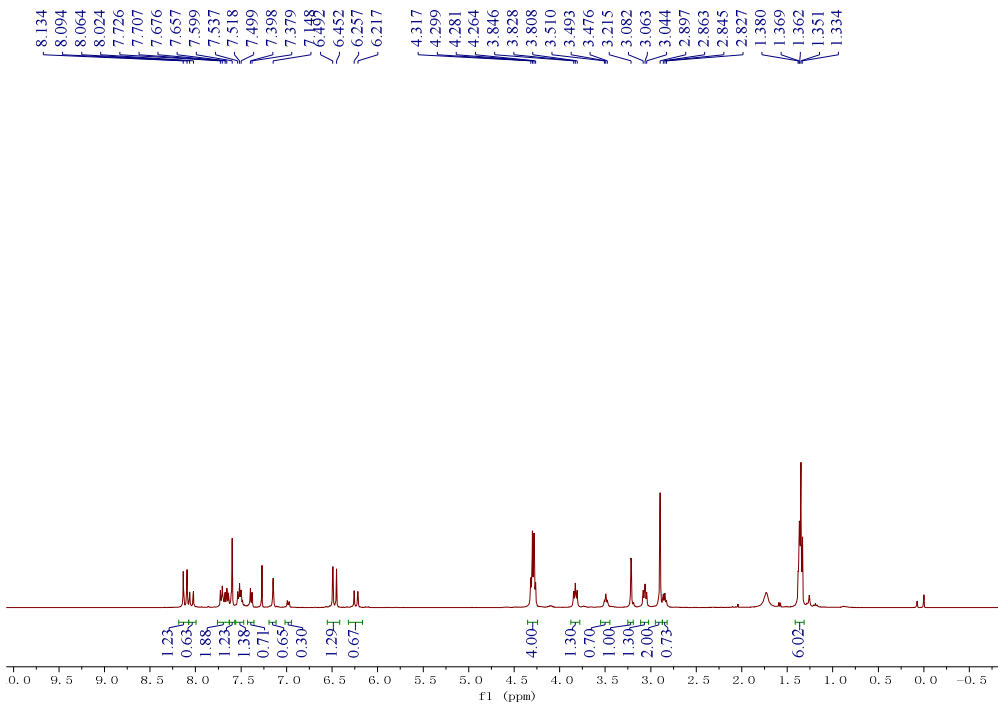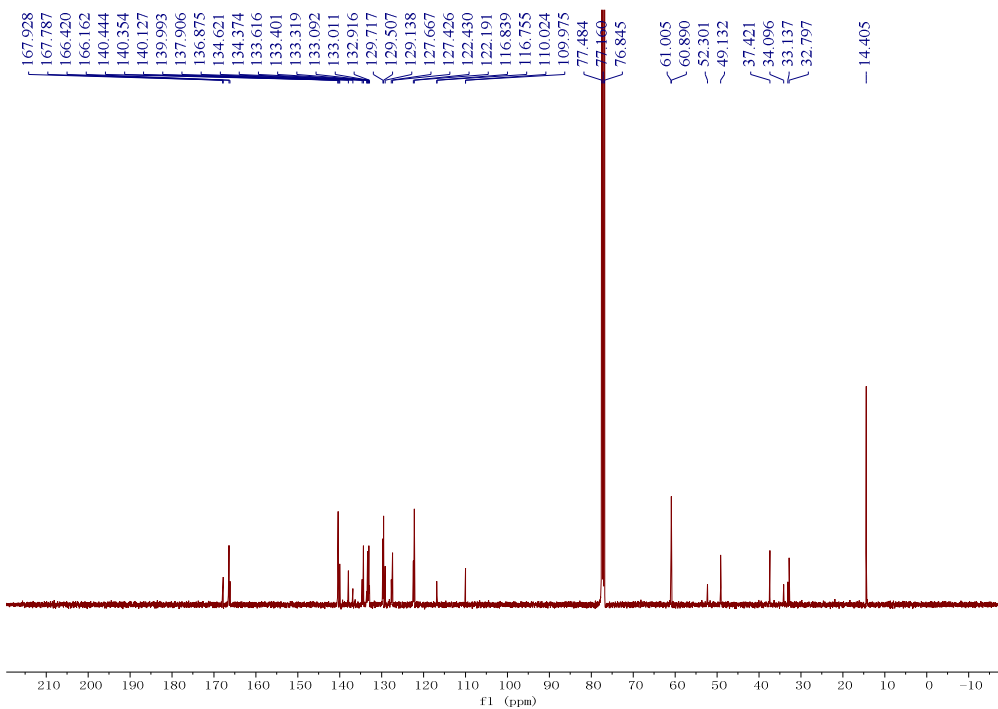

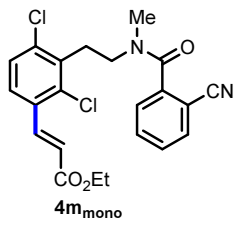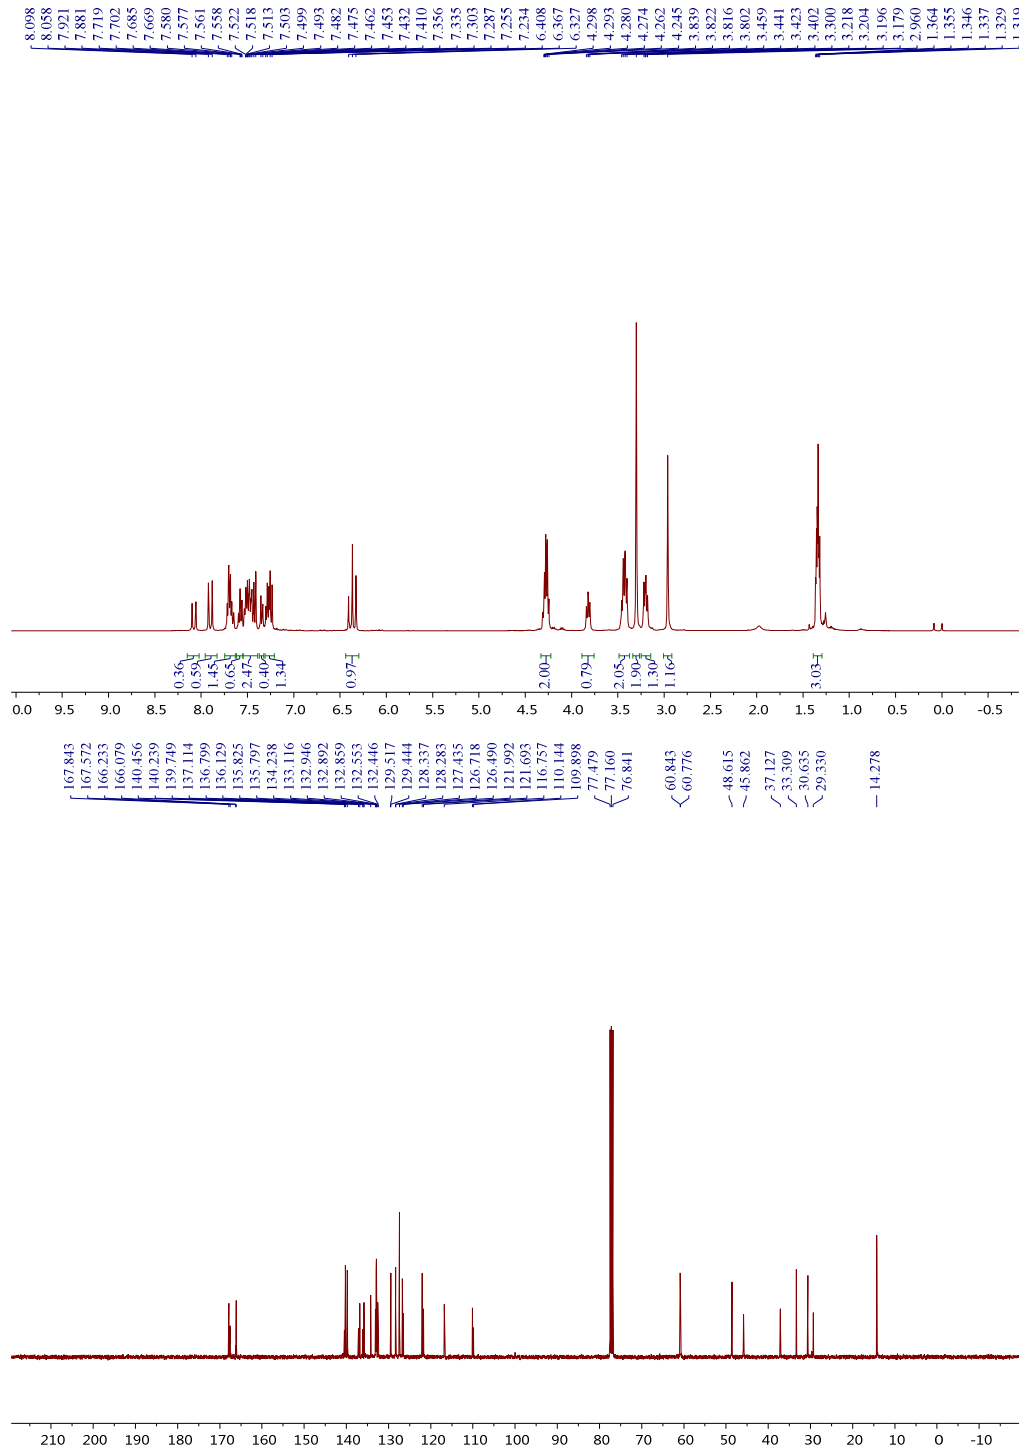

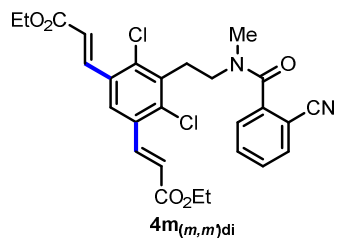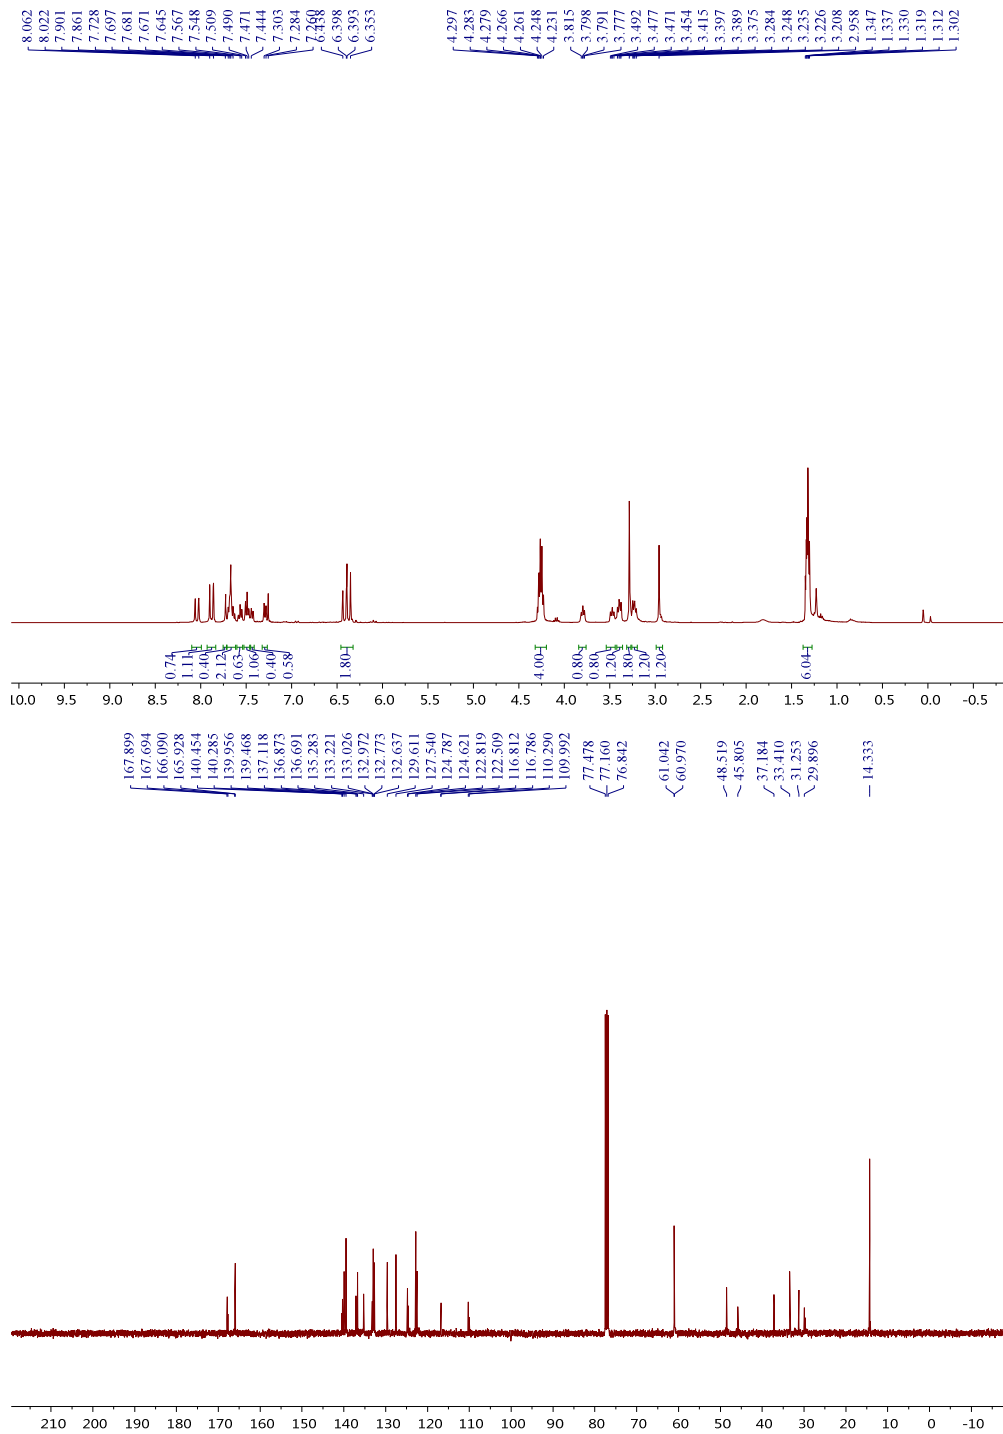

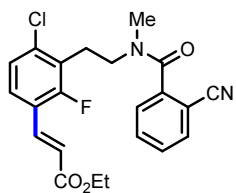

4nmono (m)

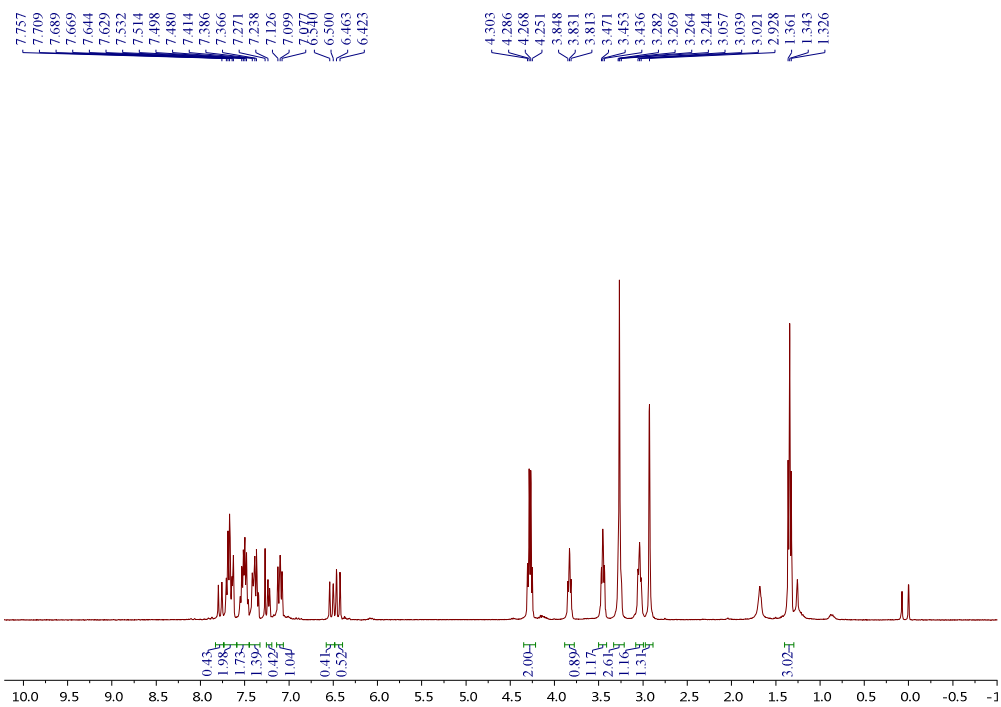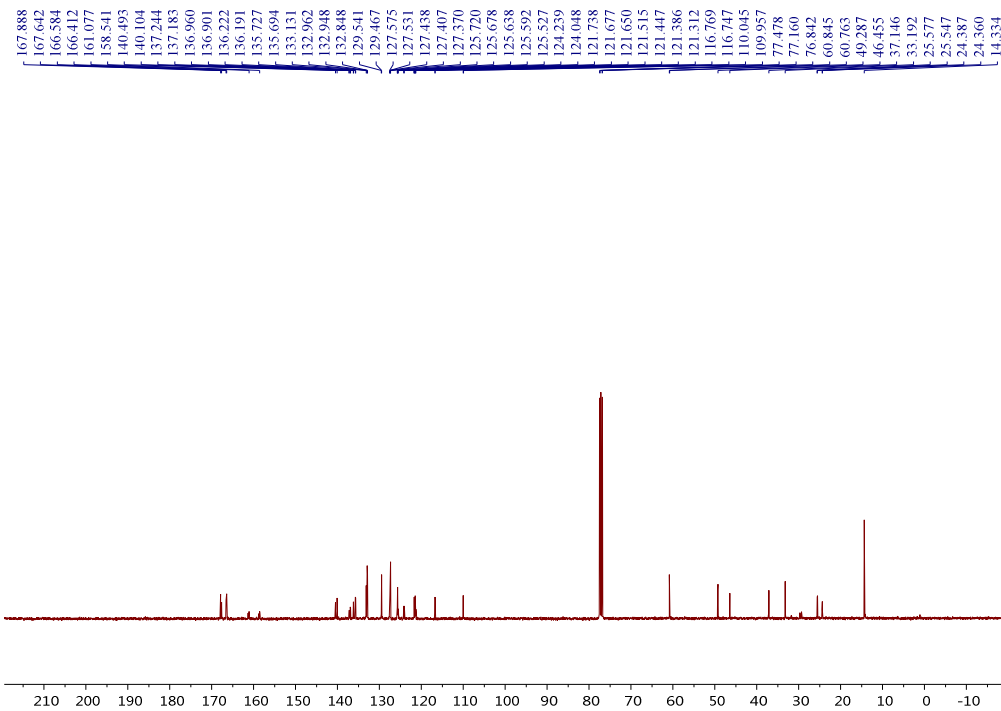

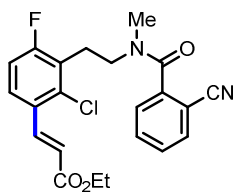

4nmono (m')

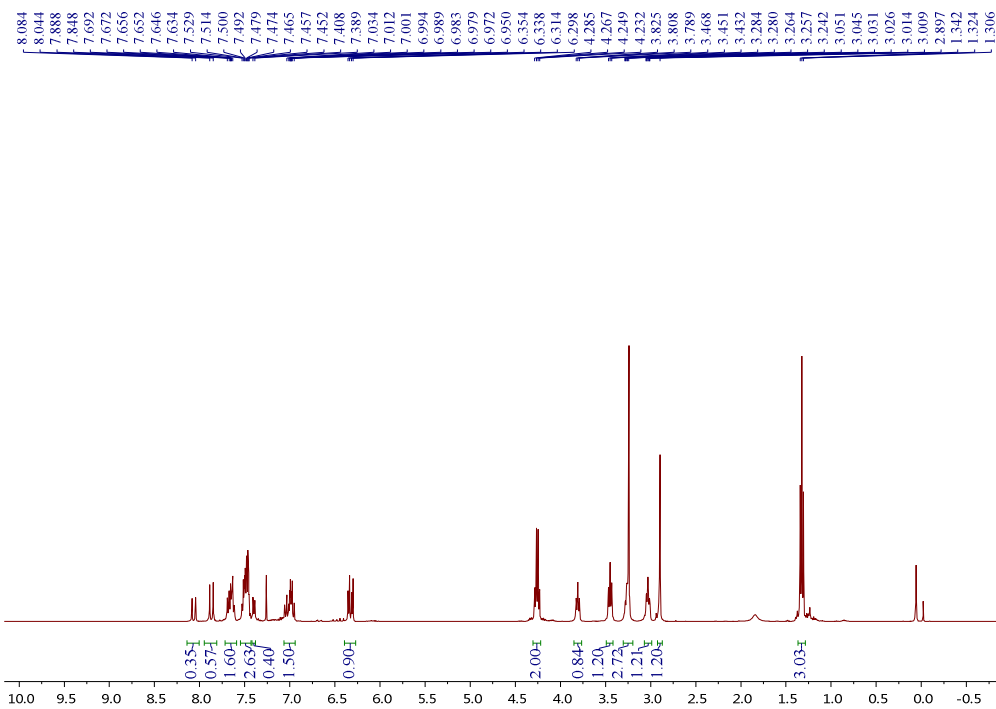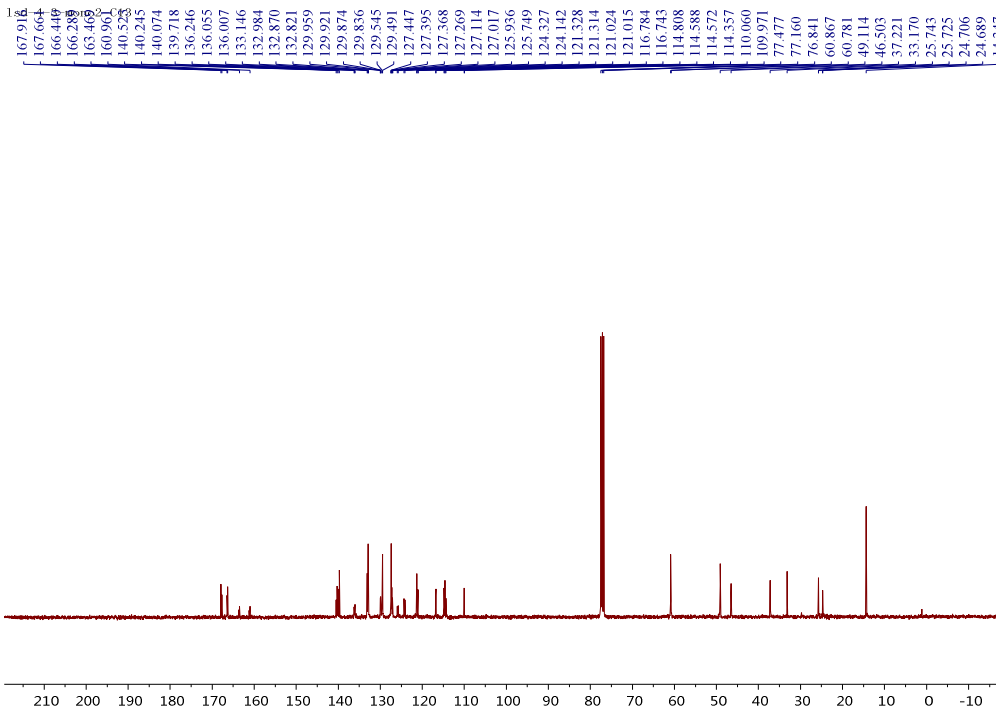

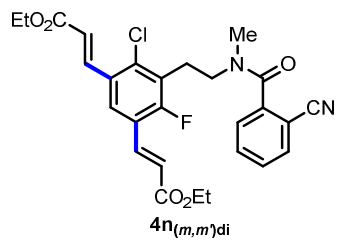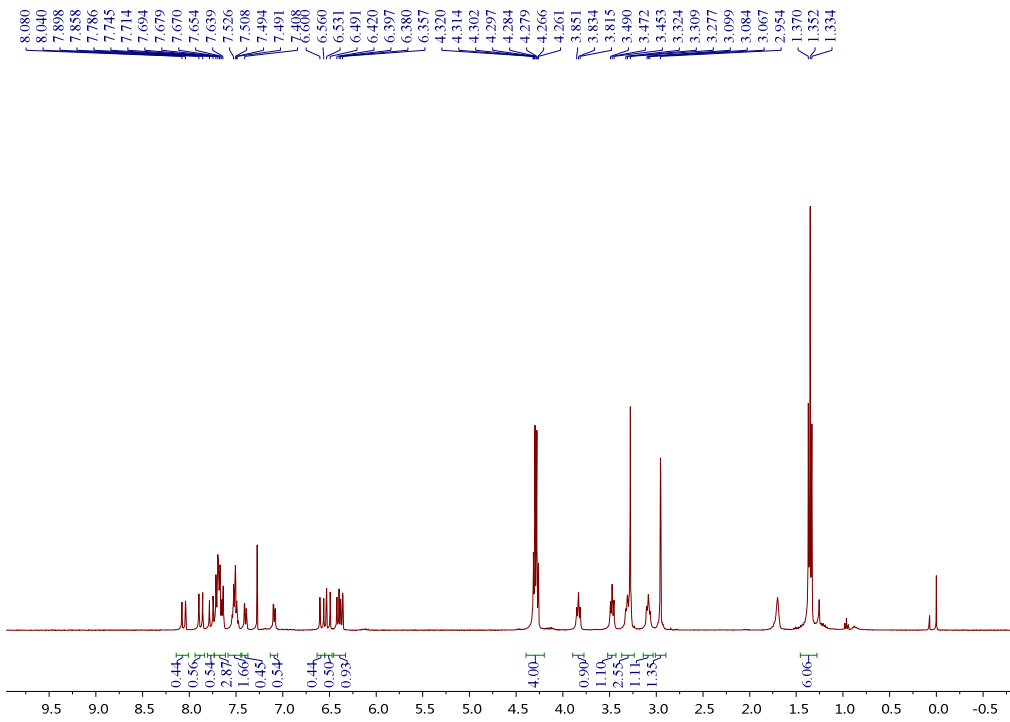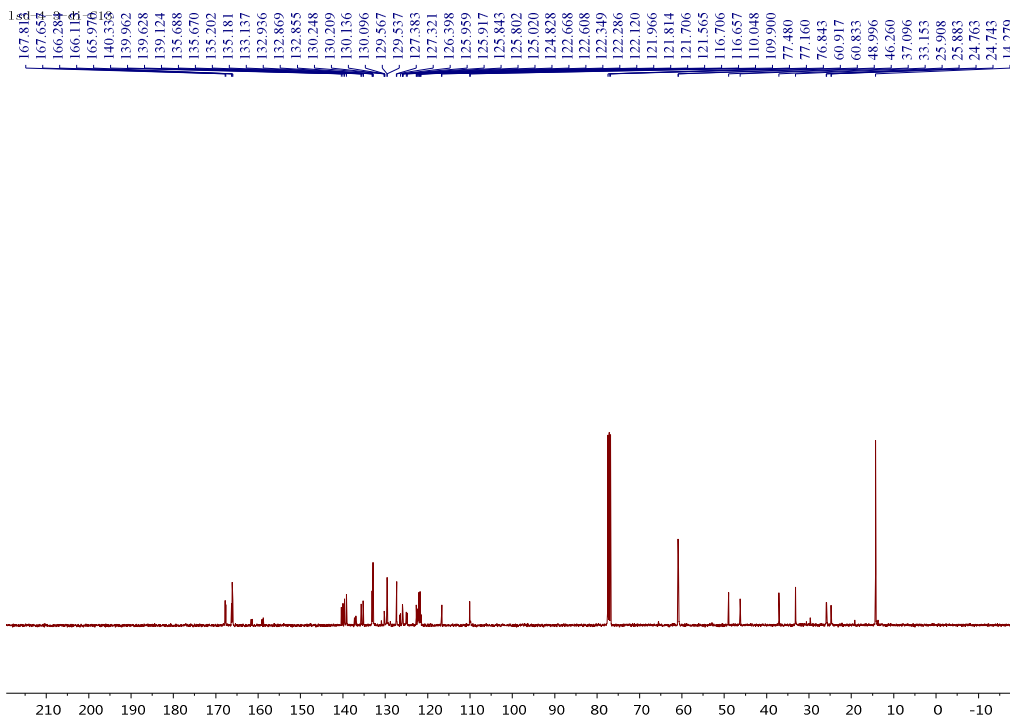

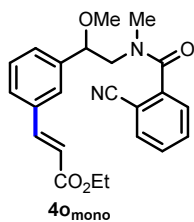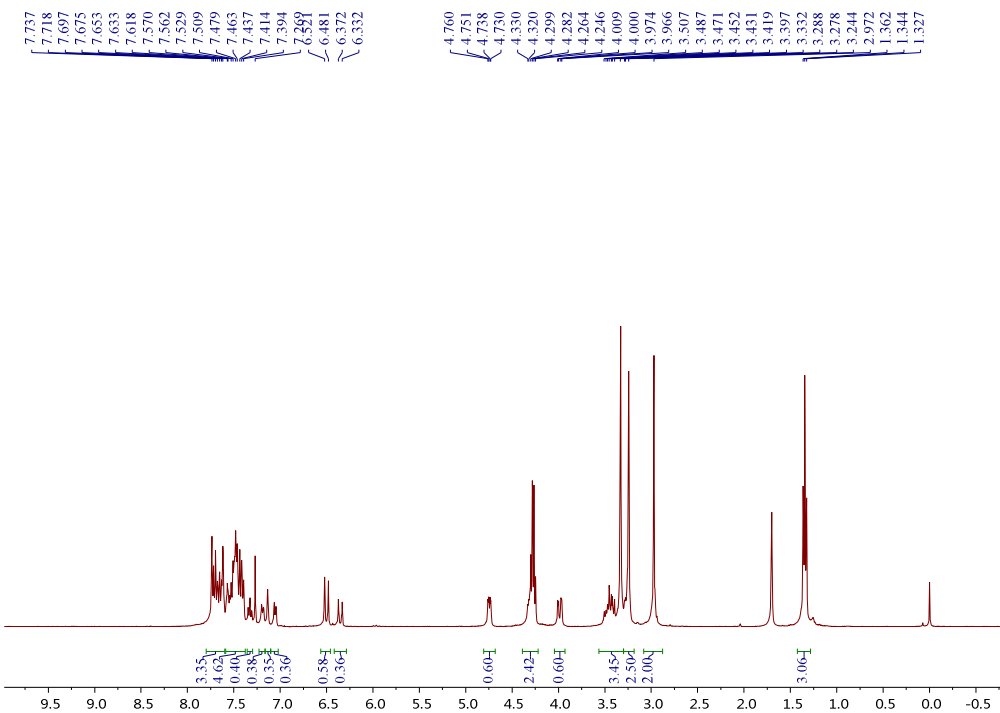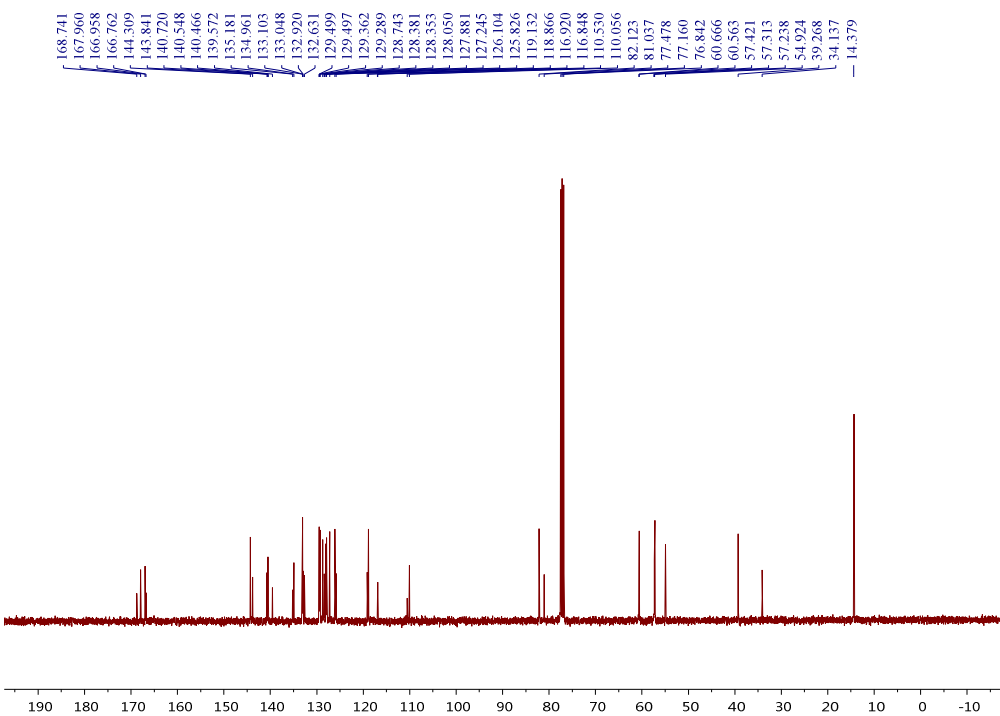

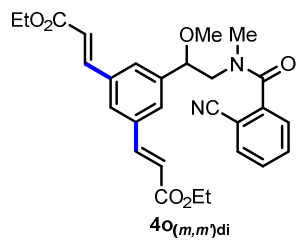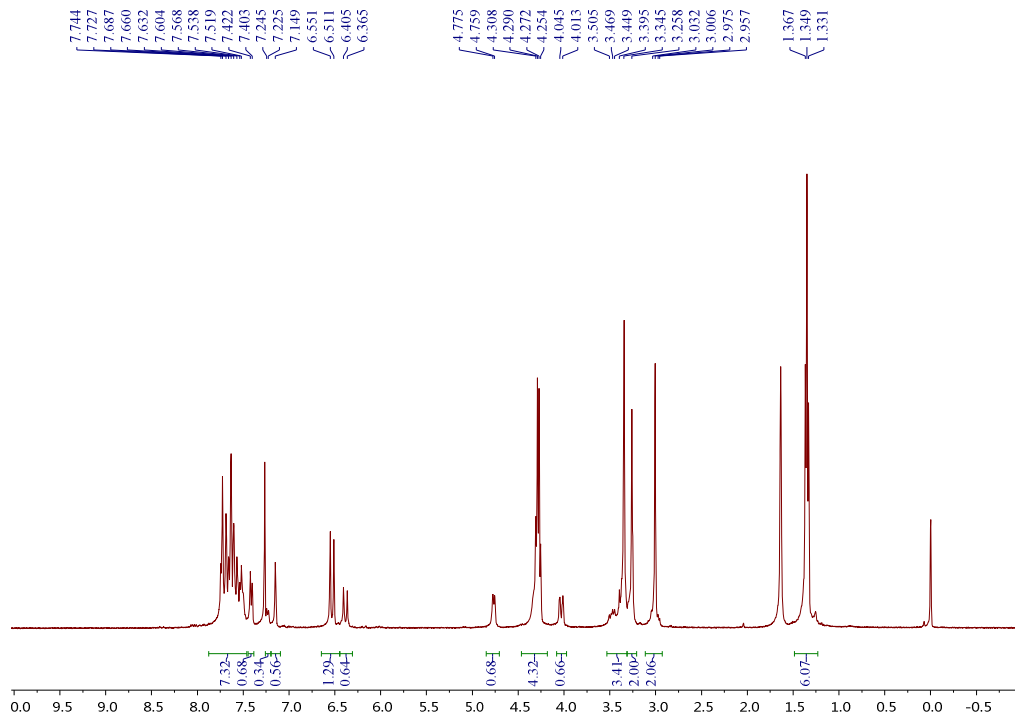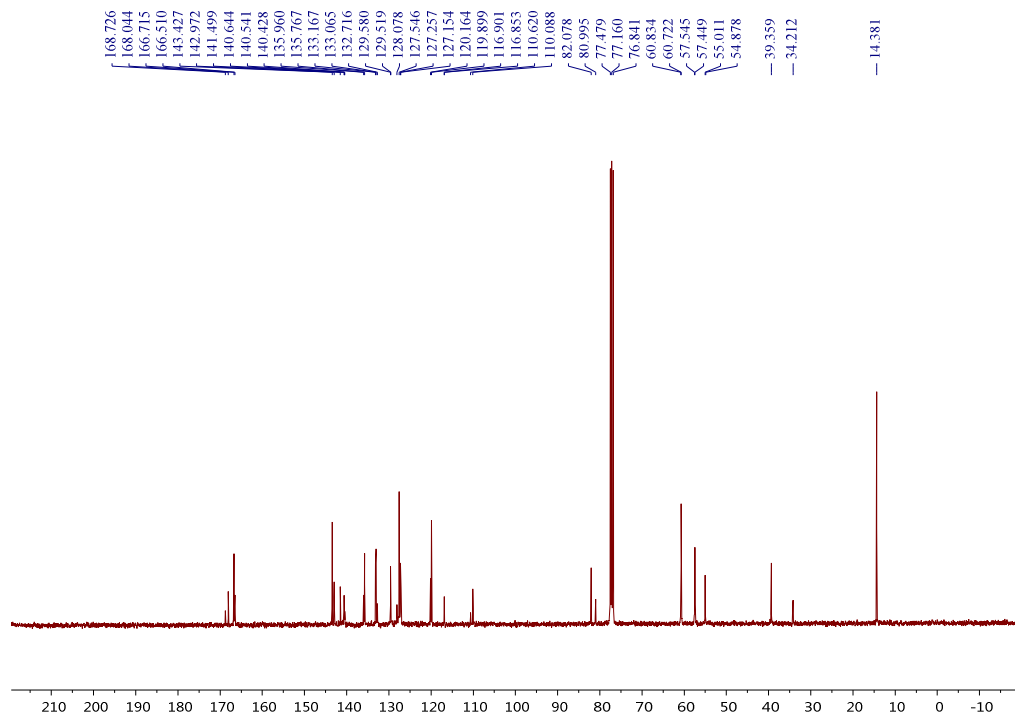



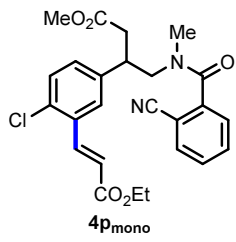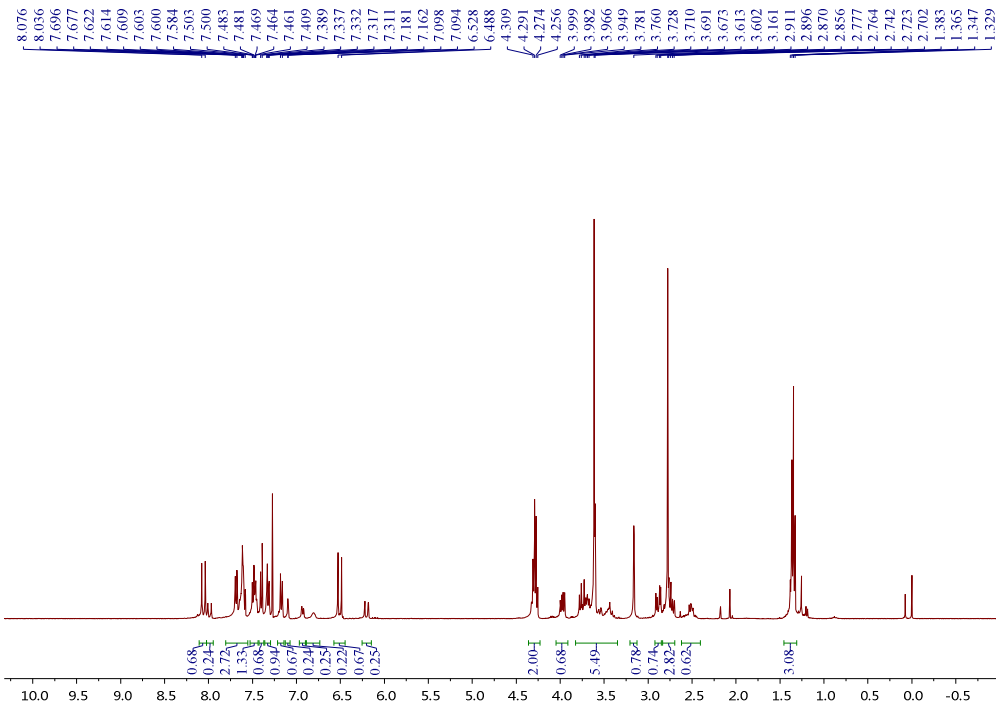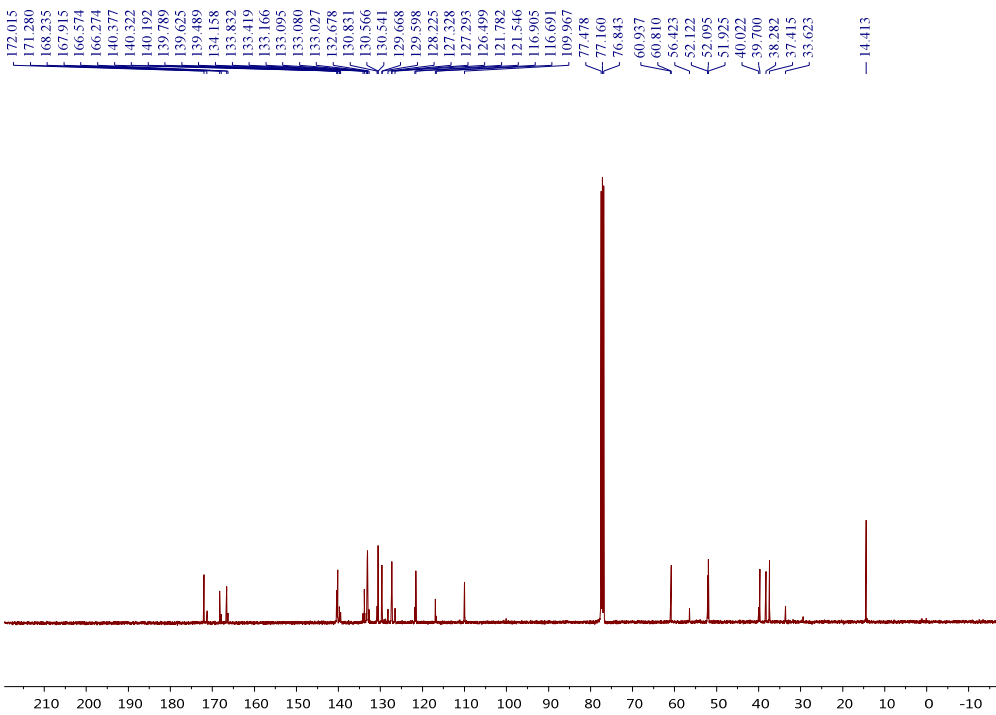

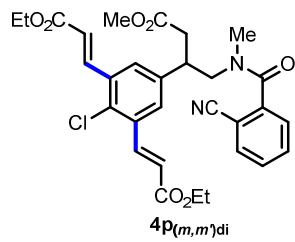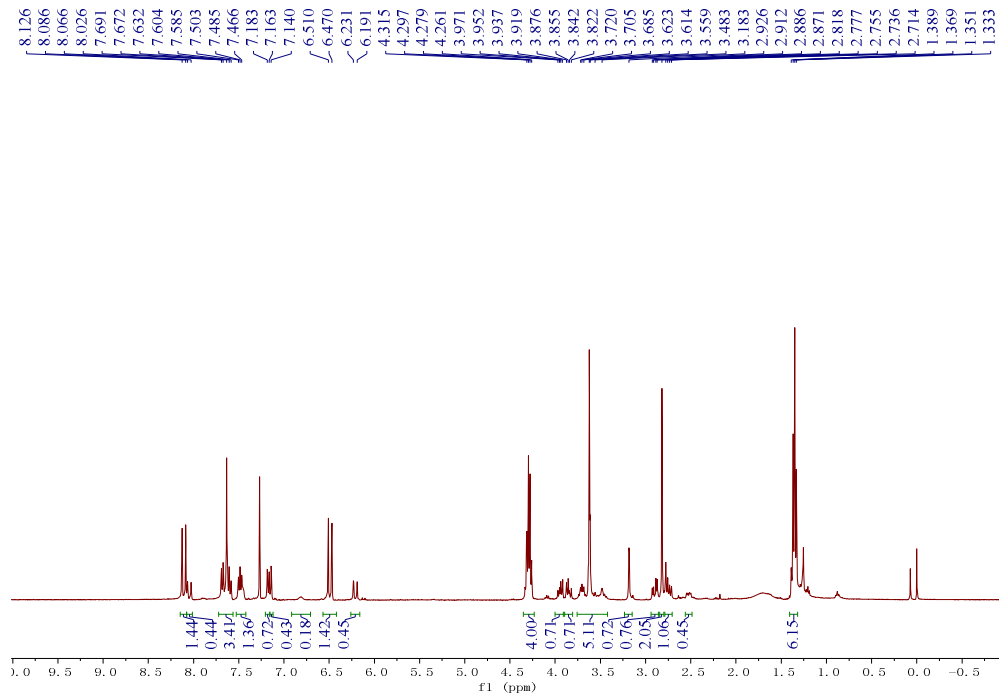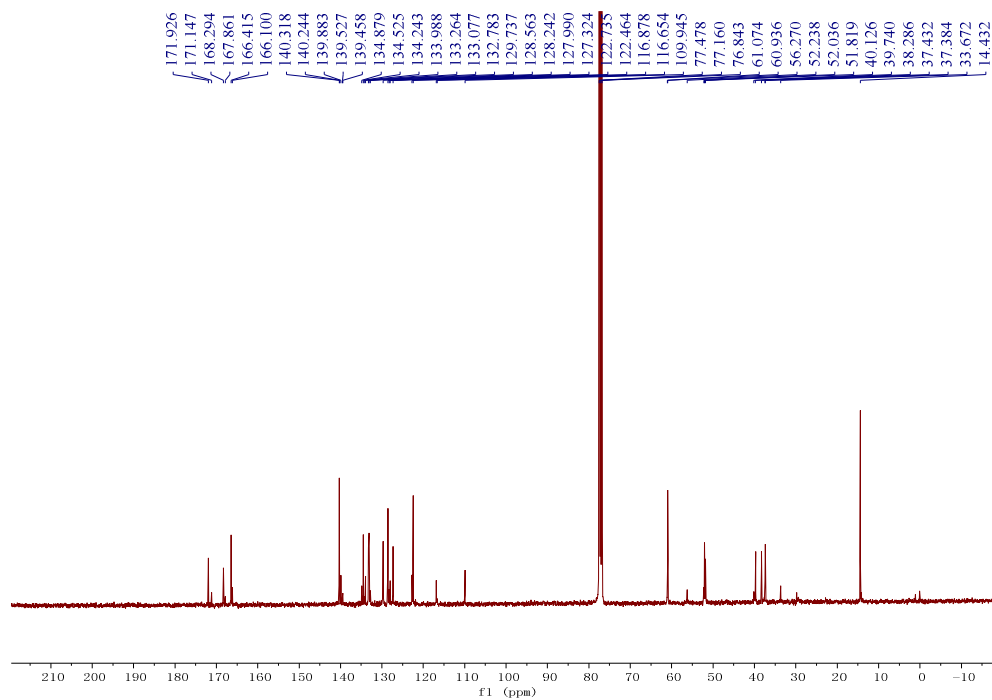

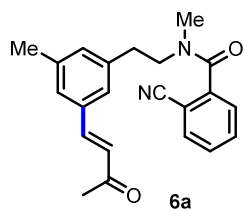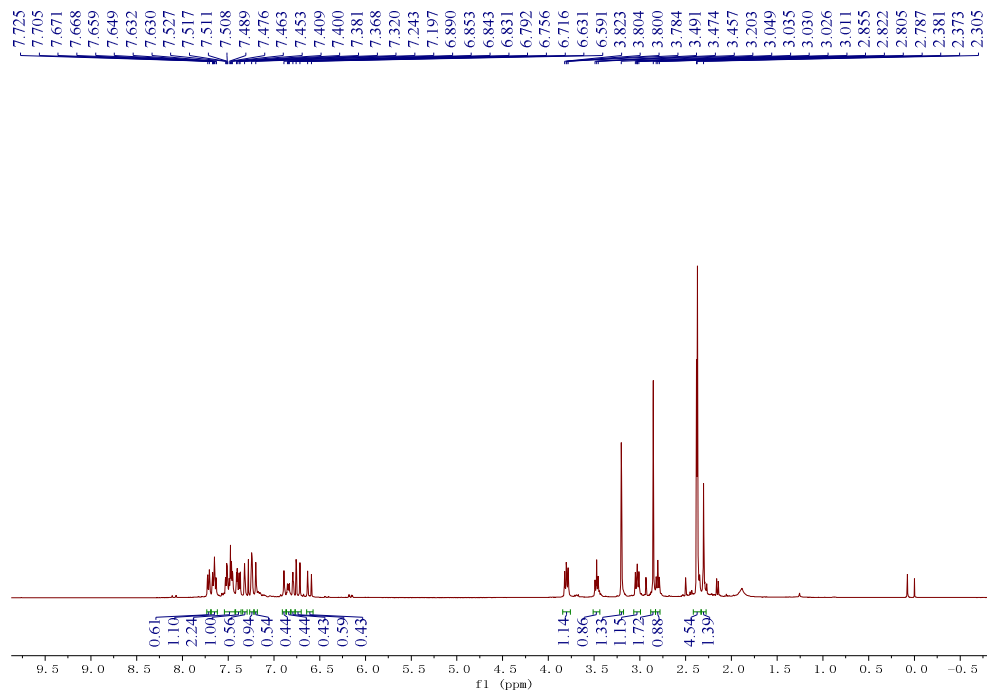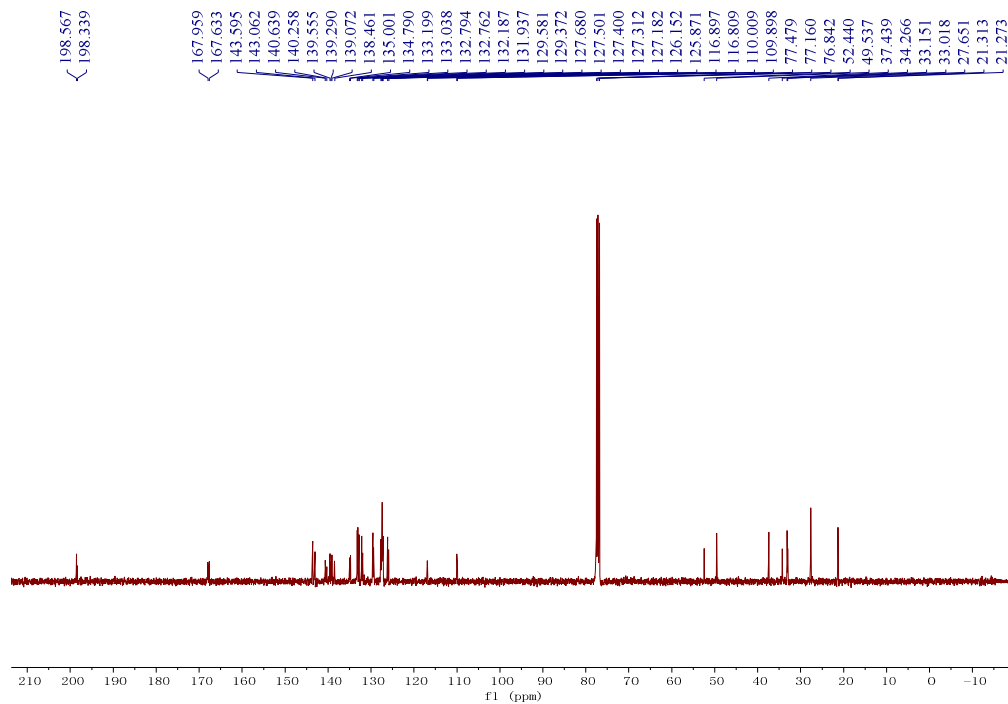

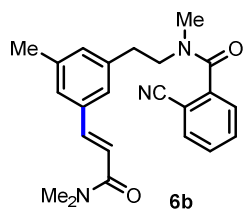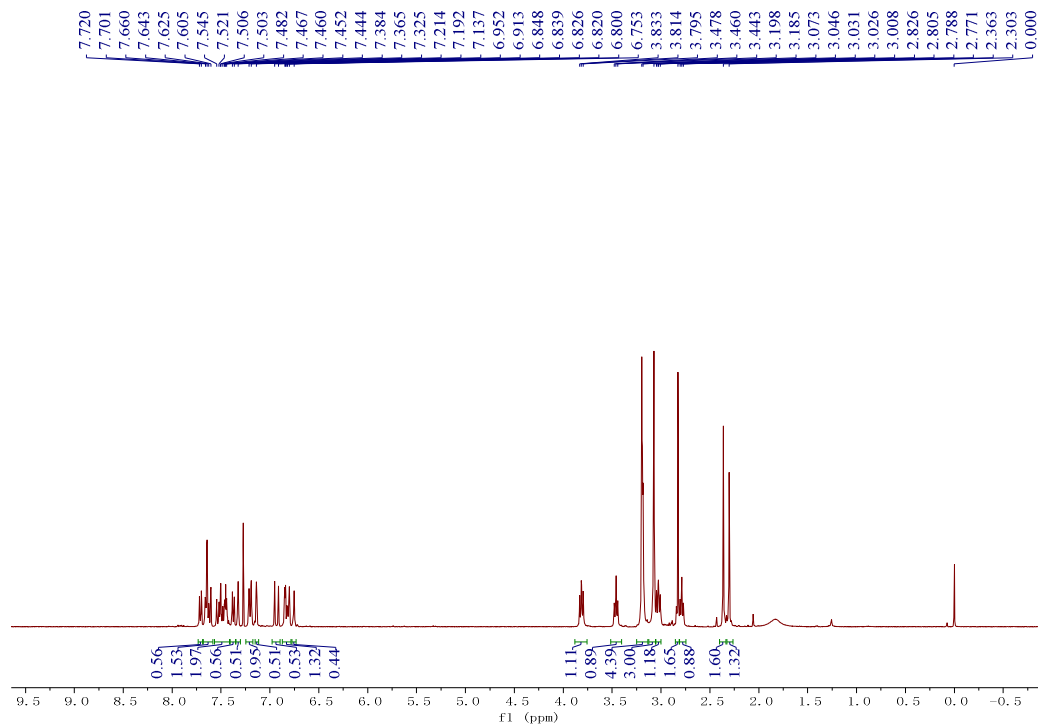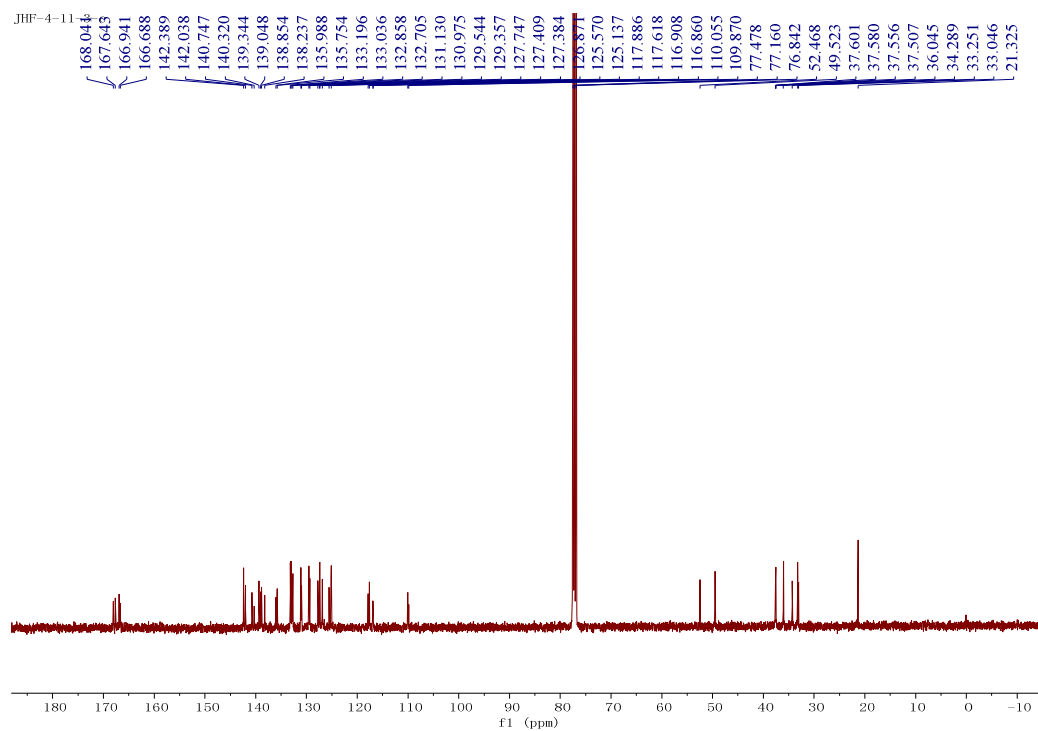

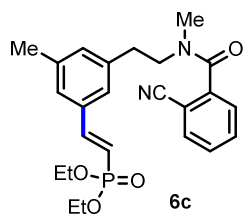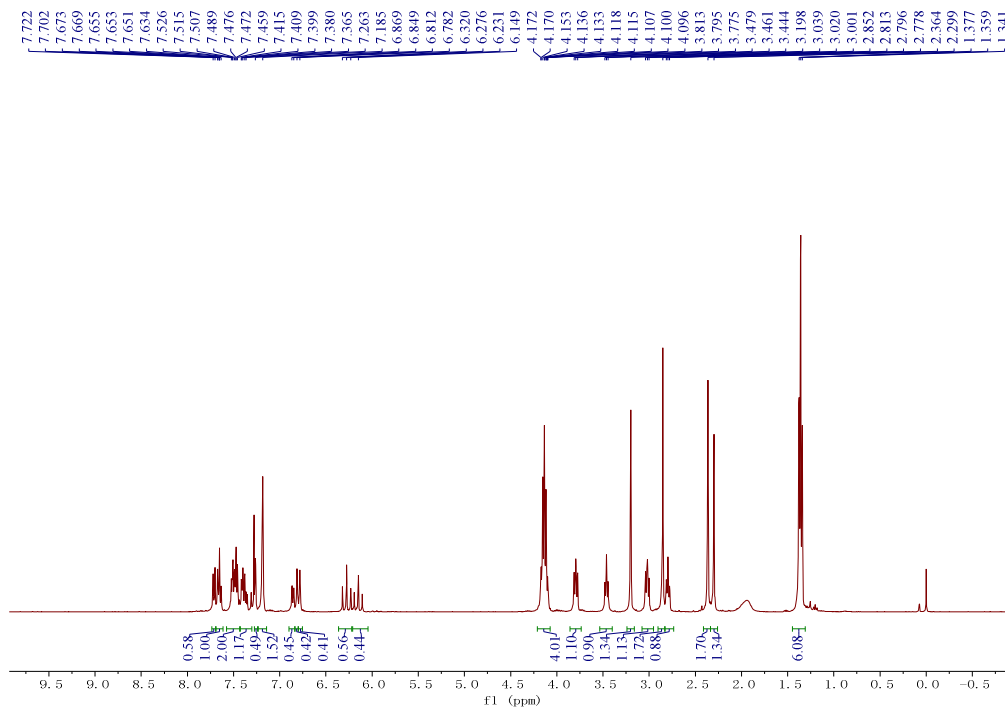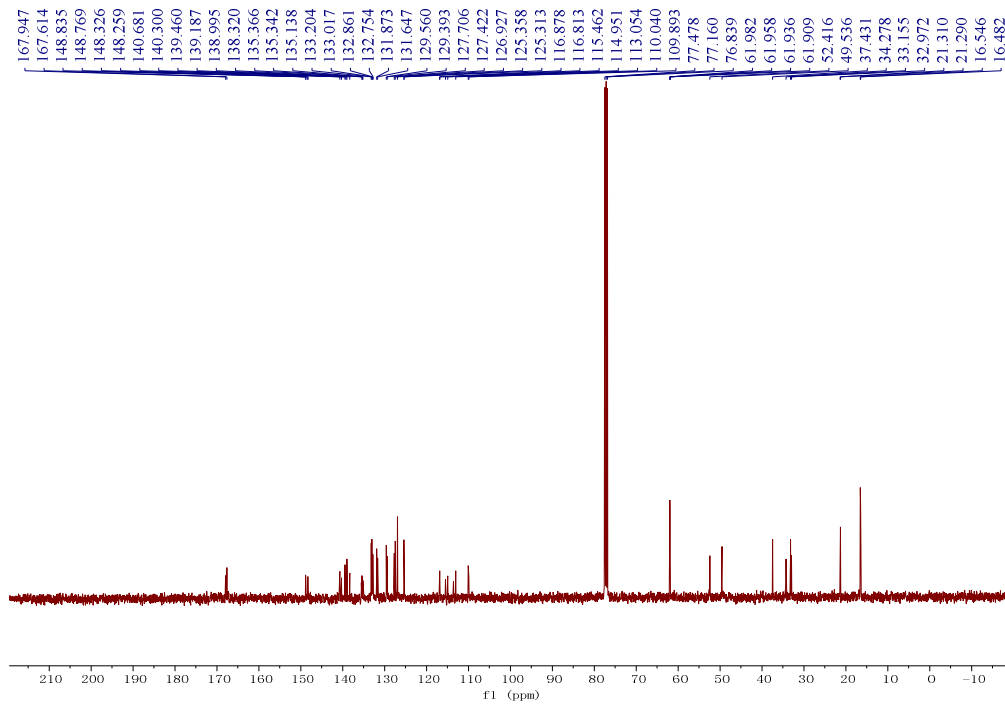

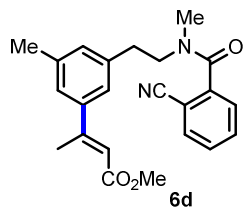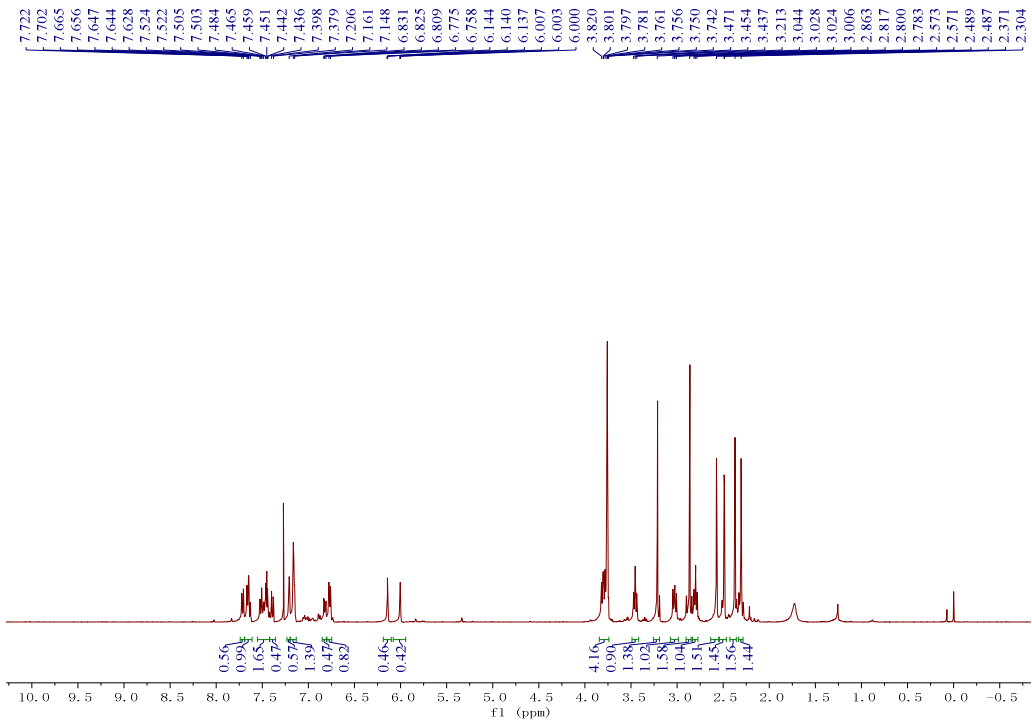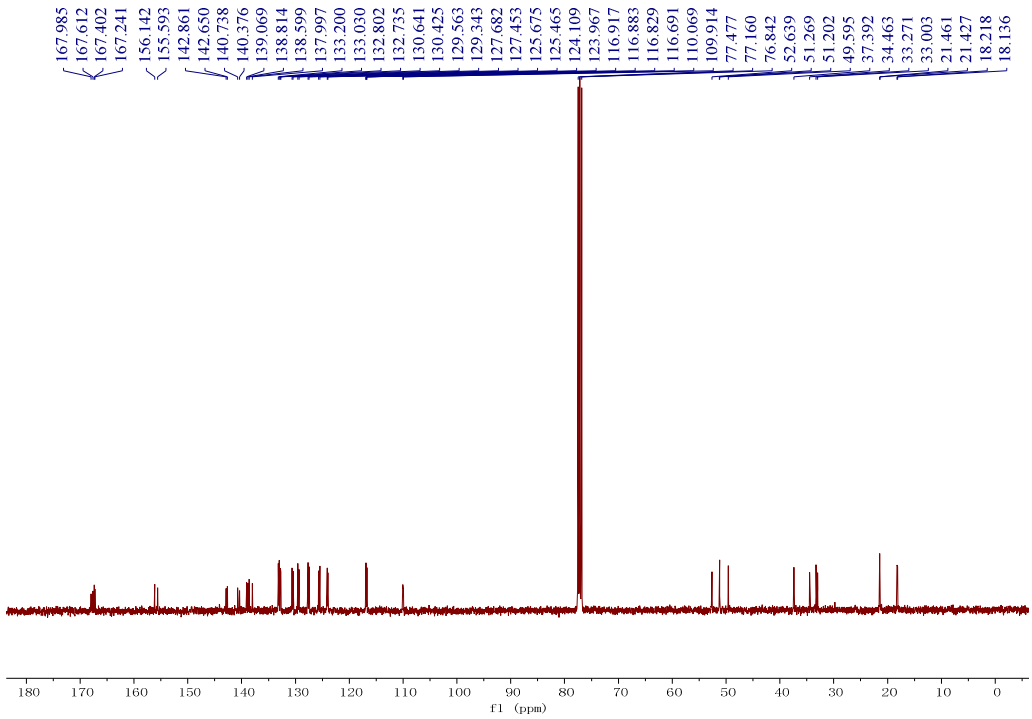

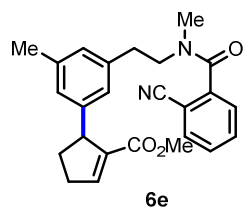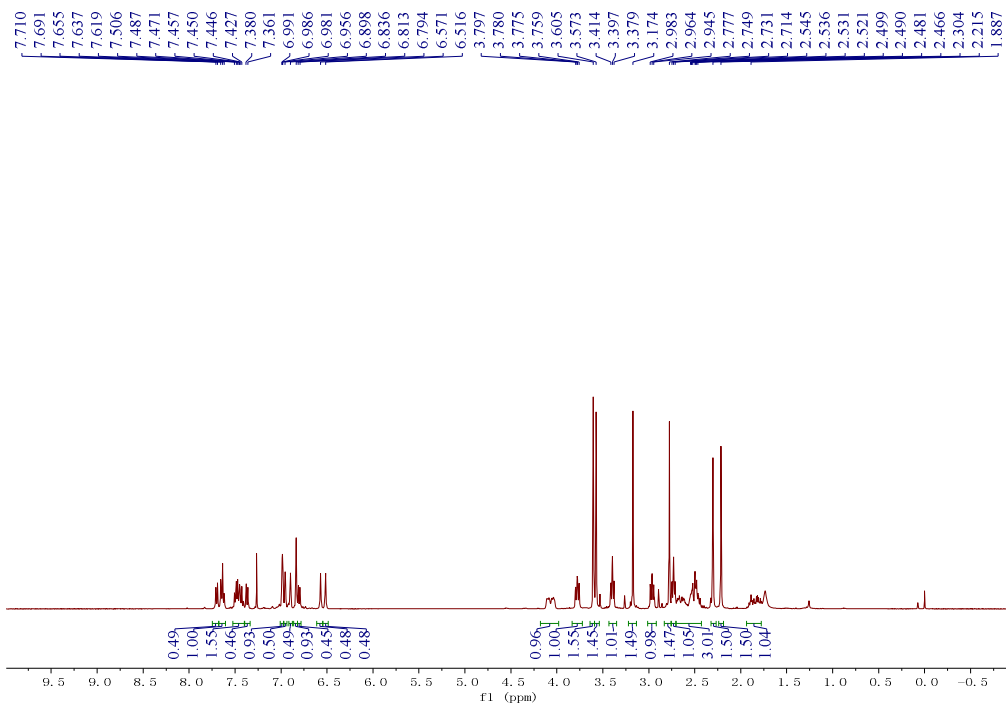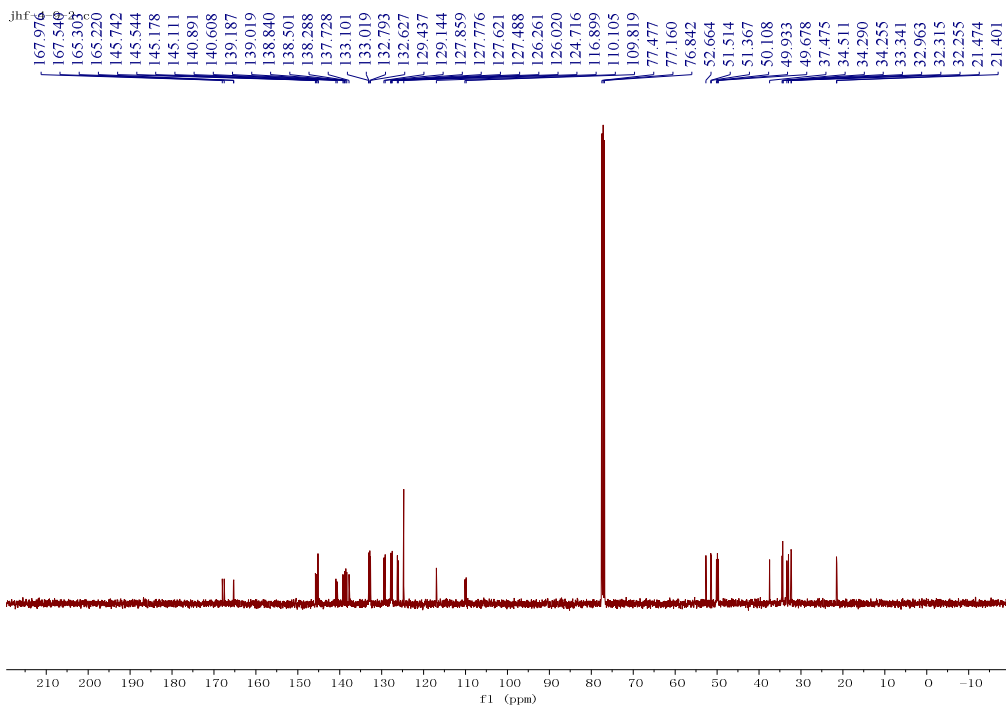

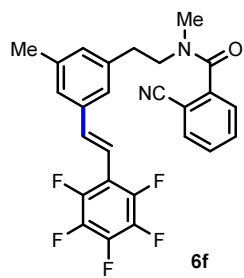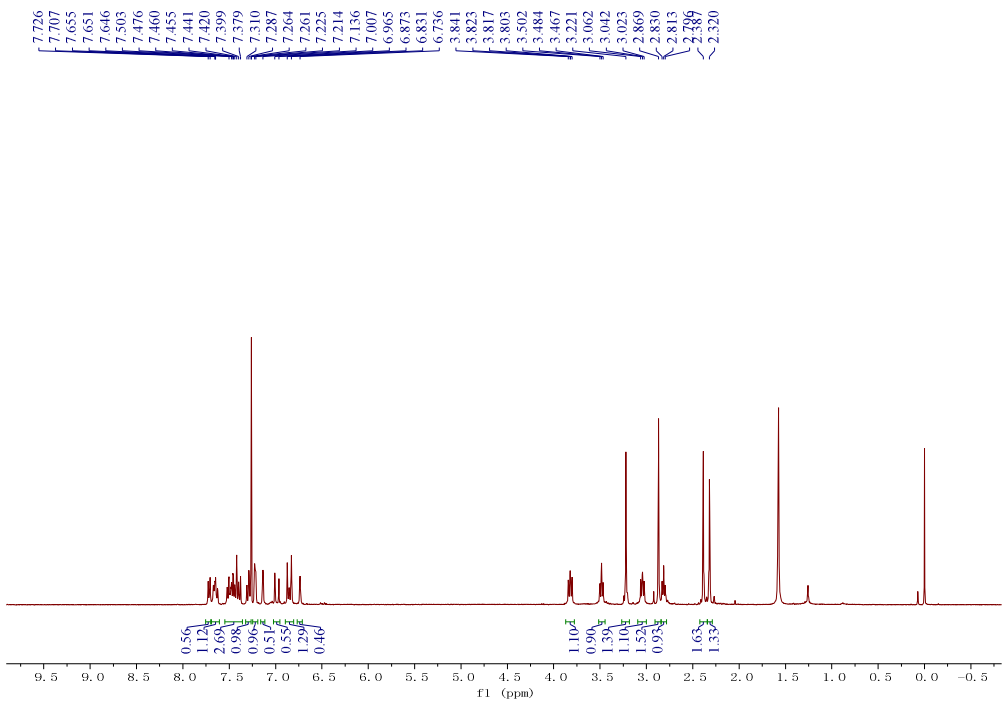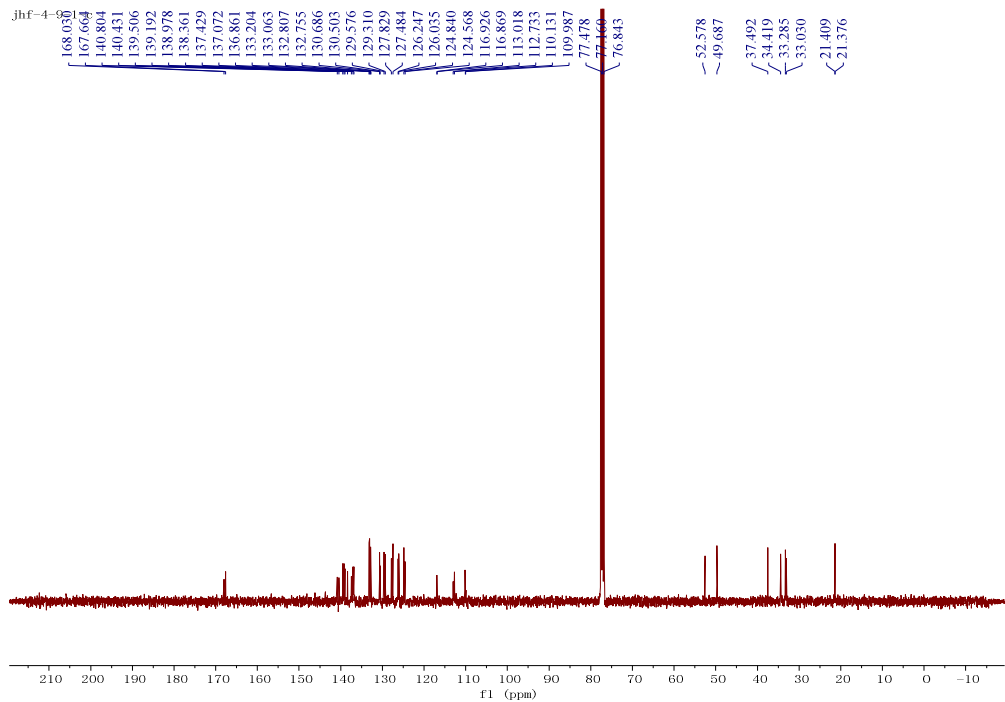



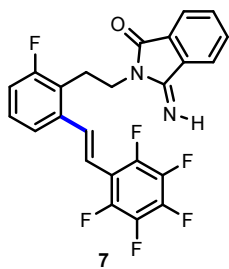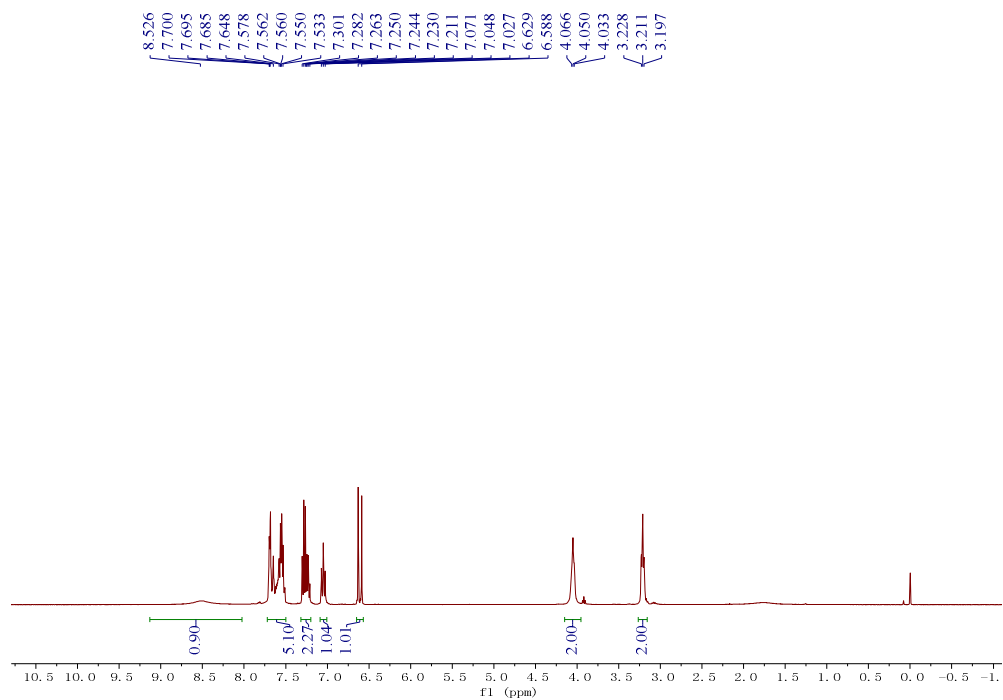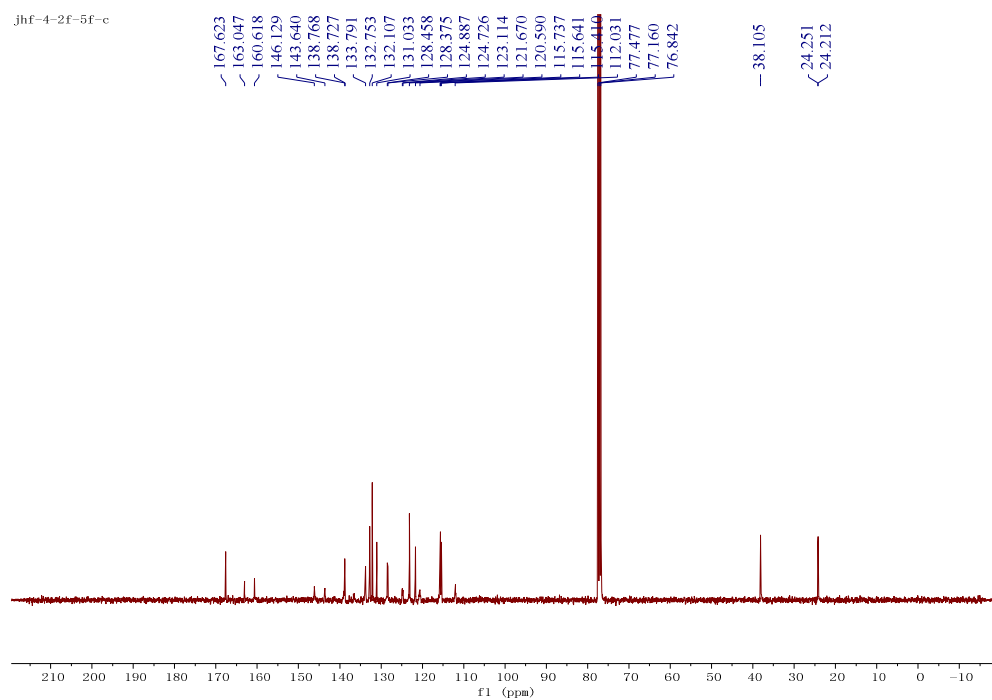

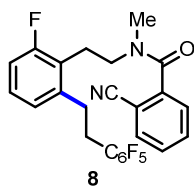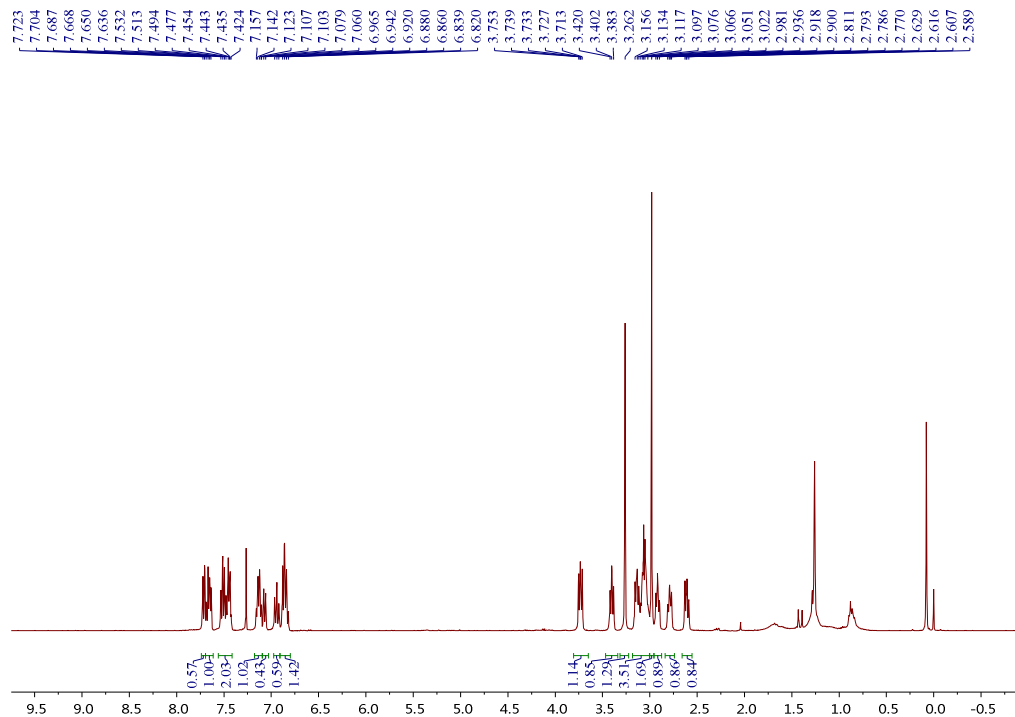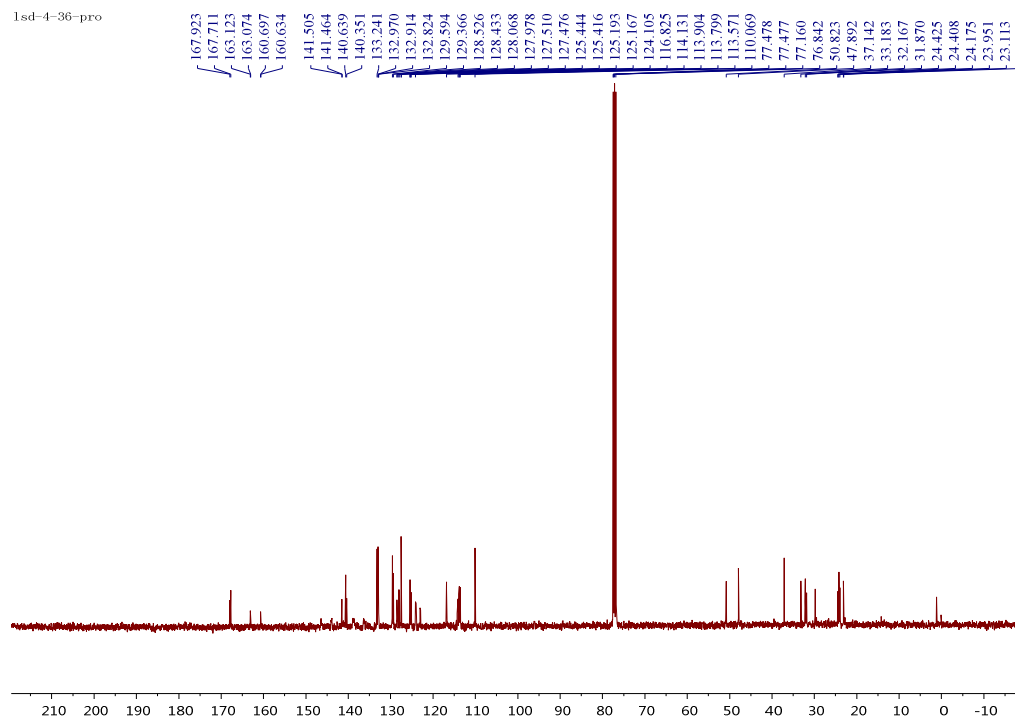

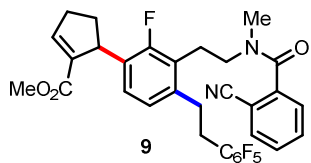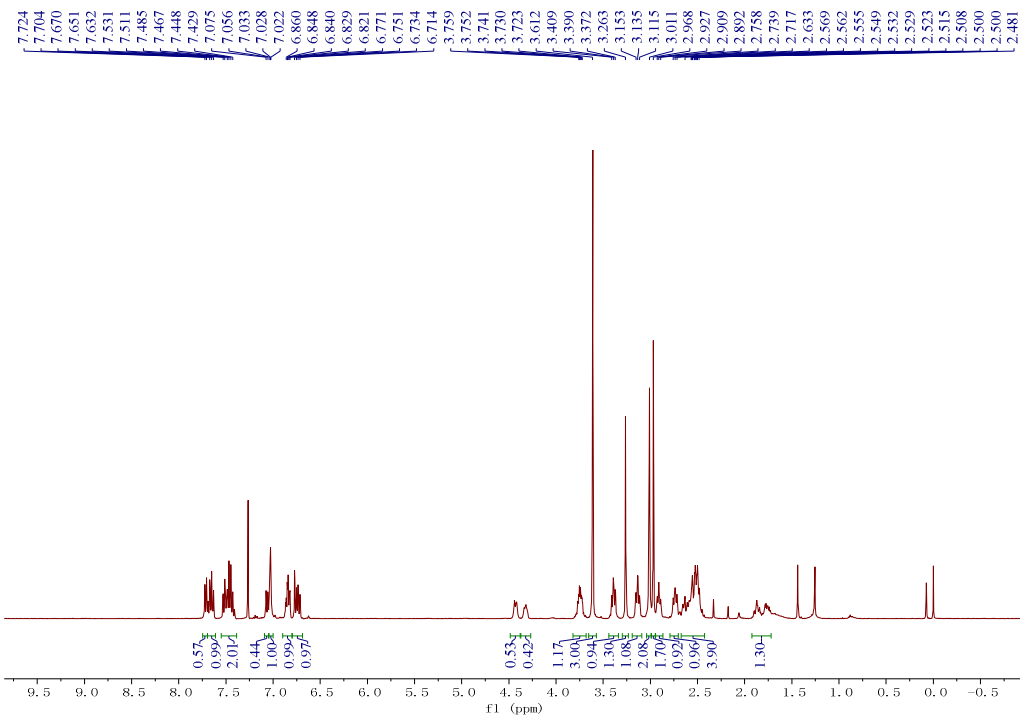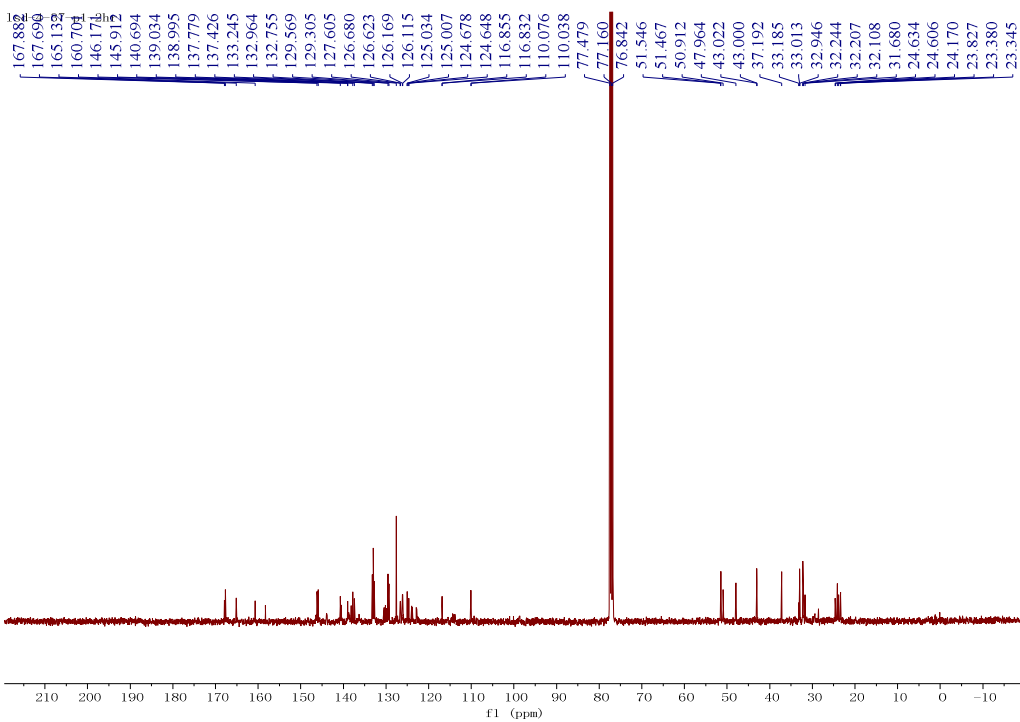

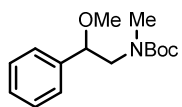

S4

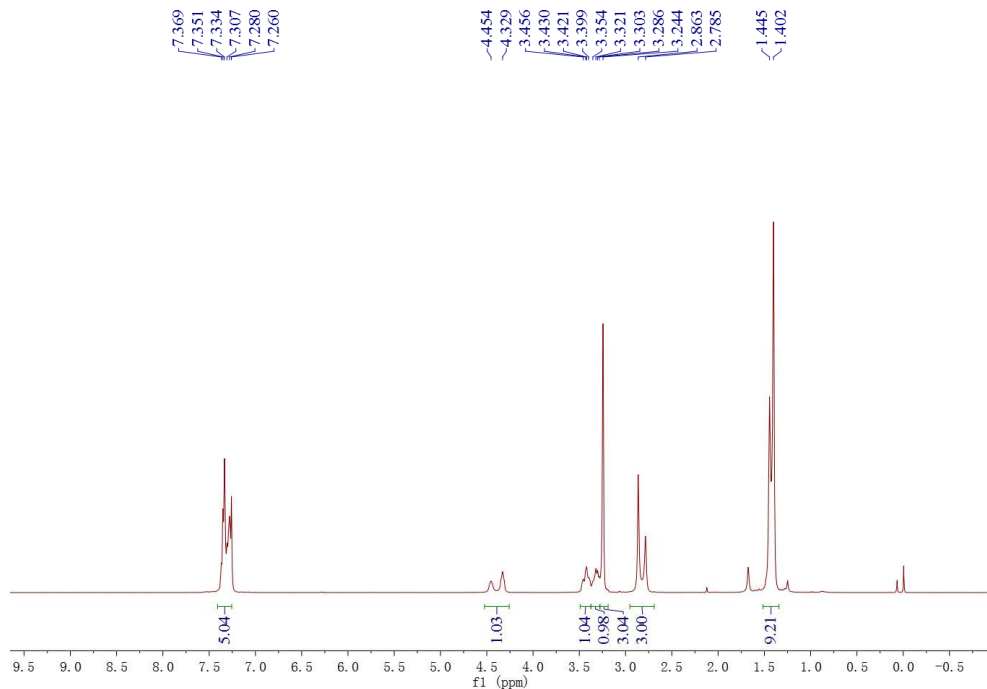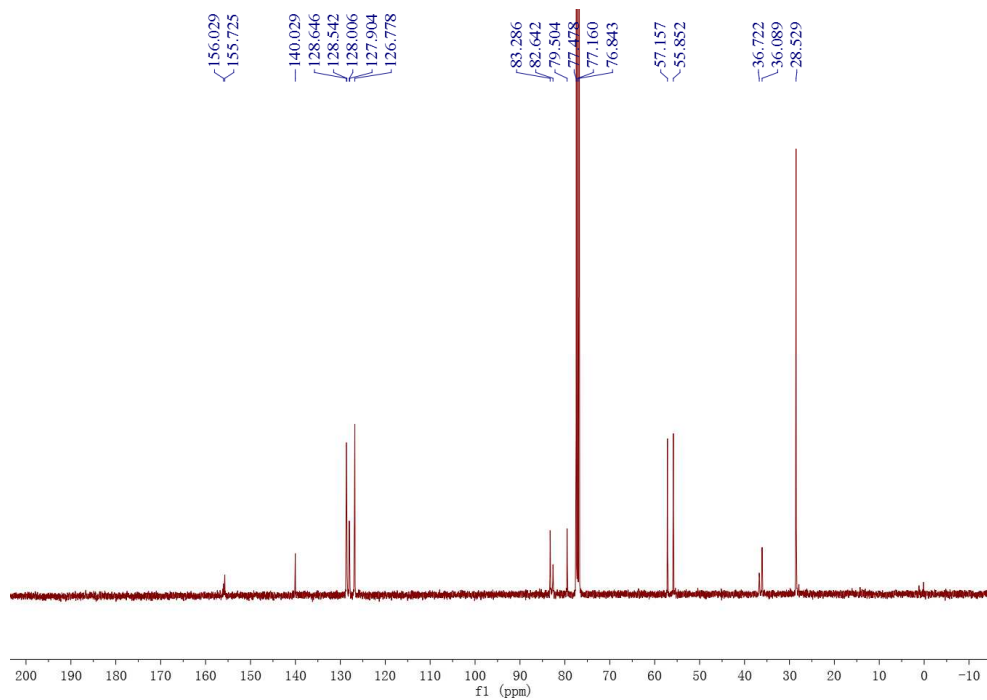

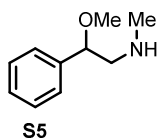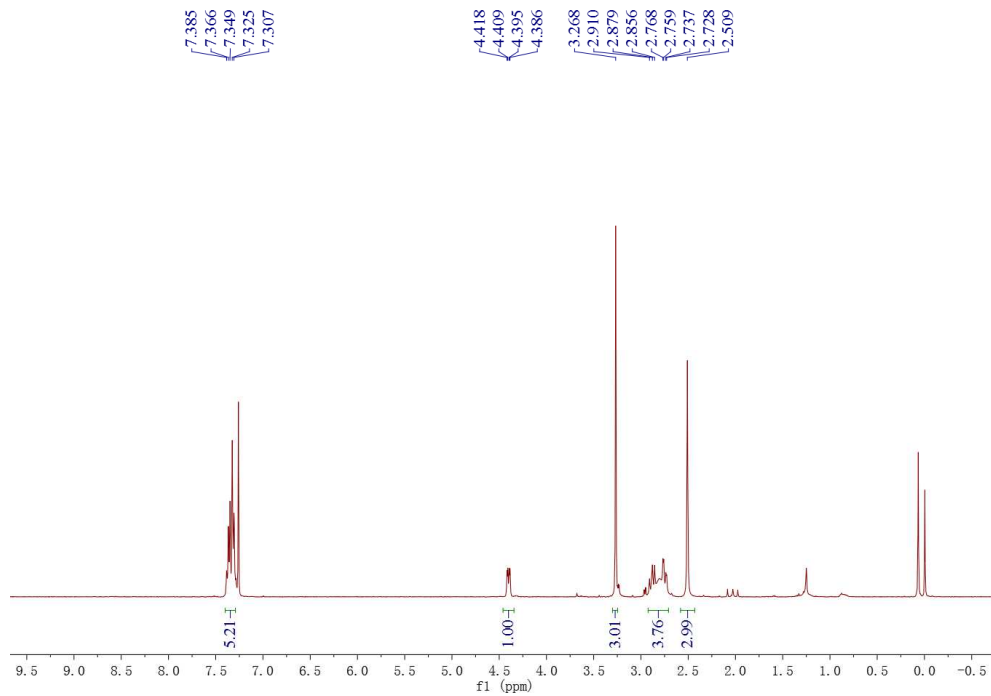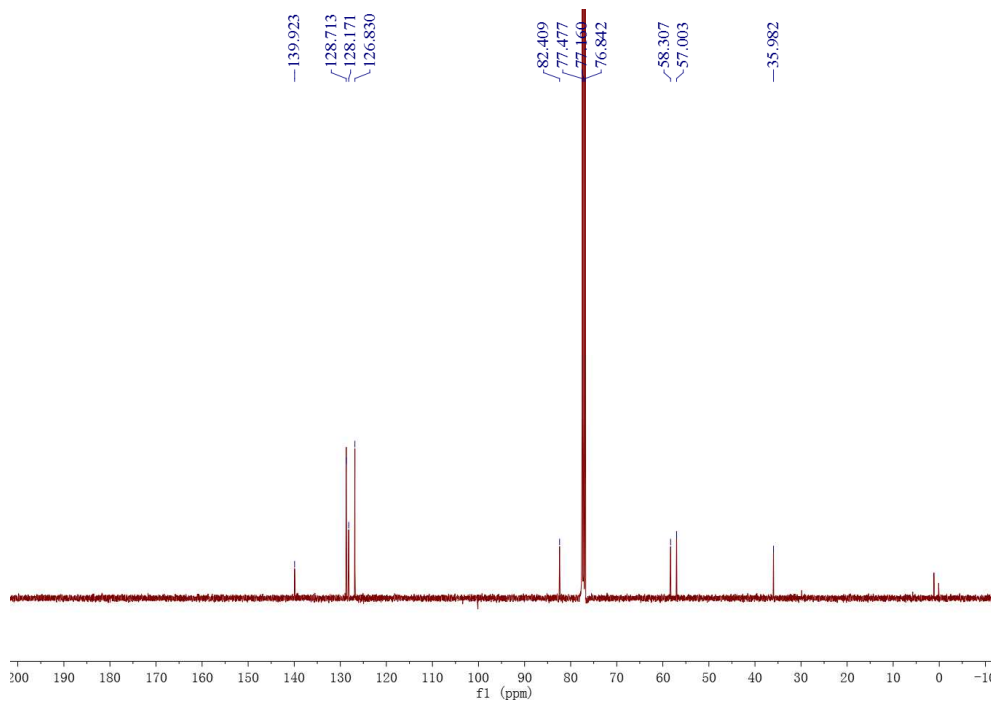

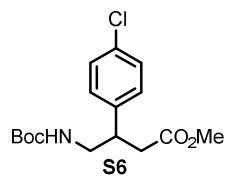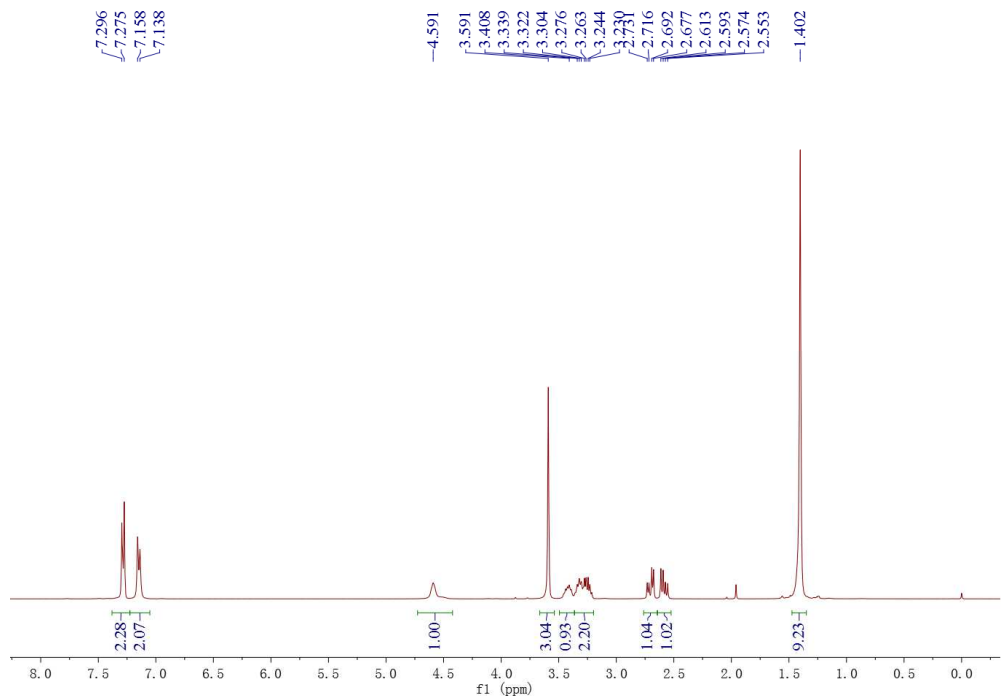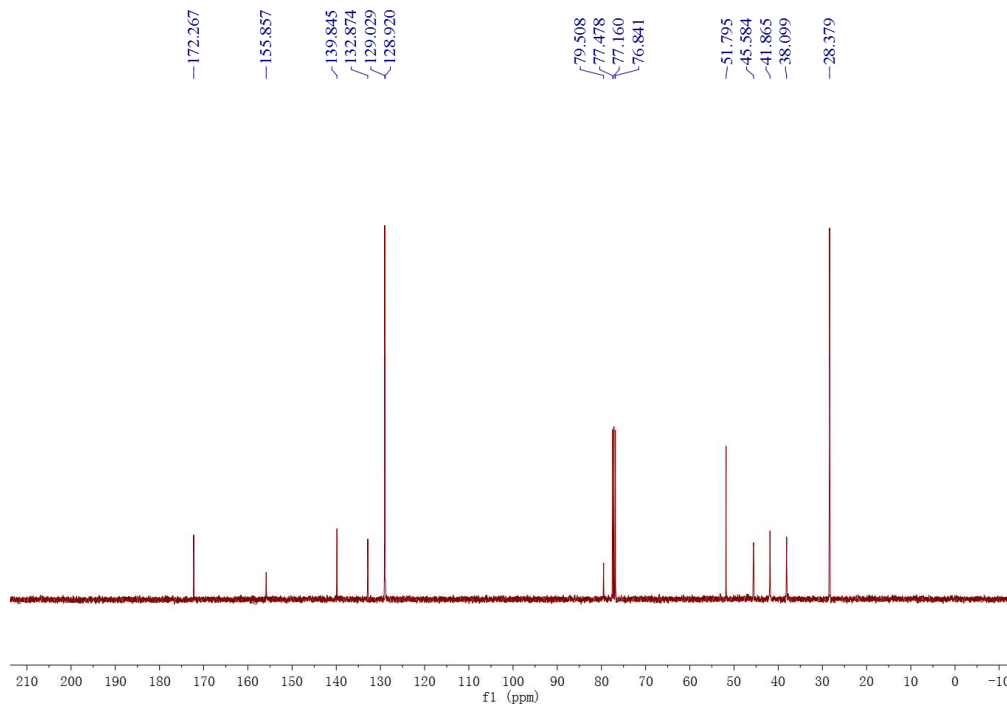

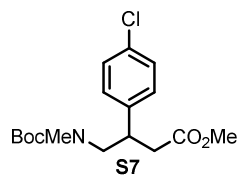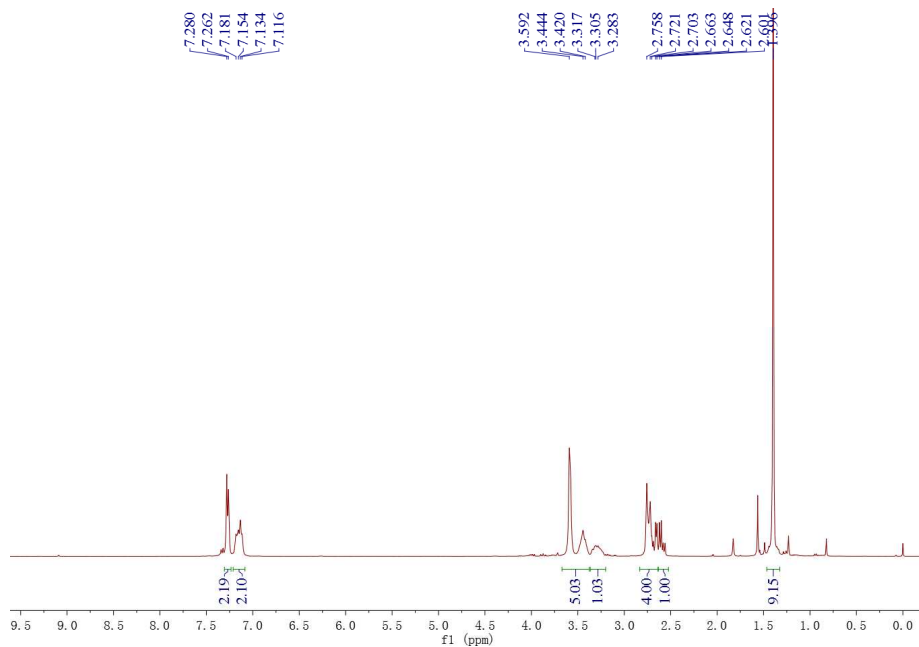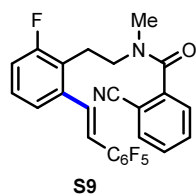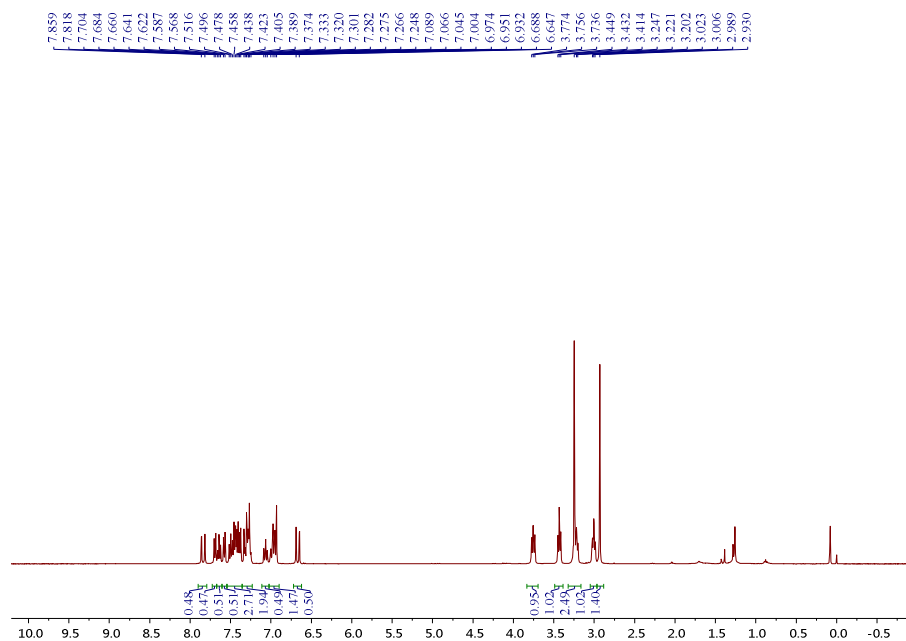

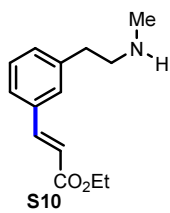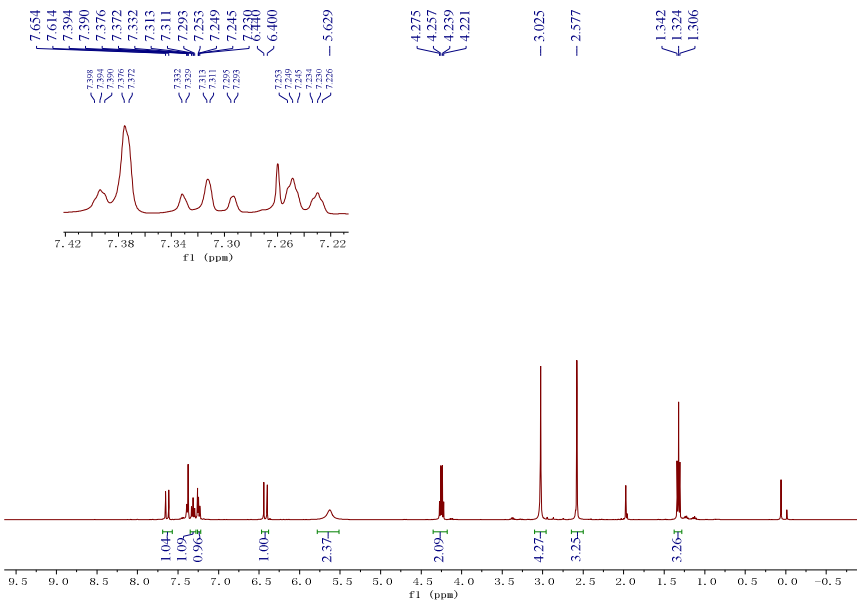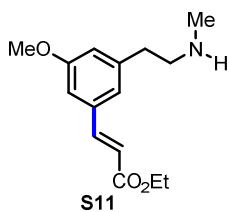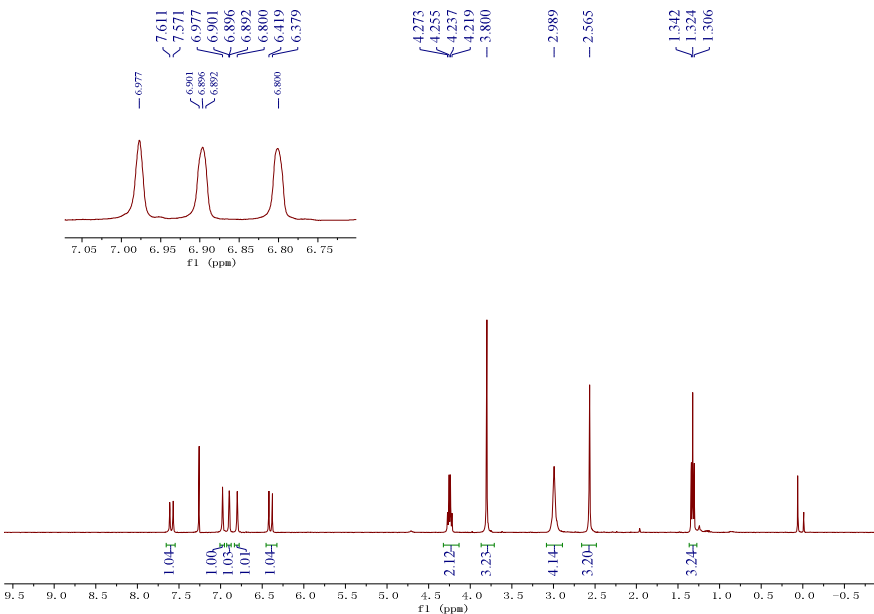



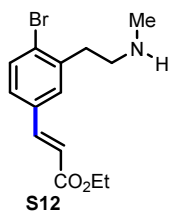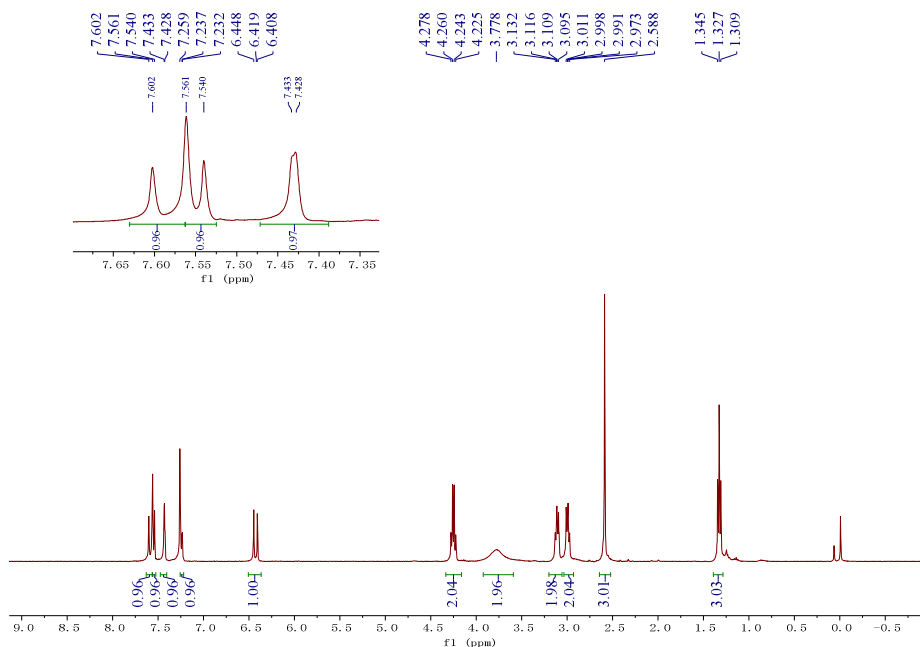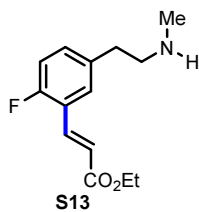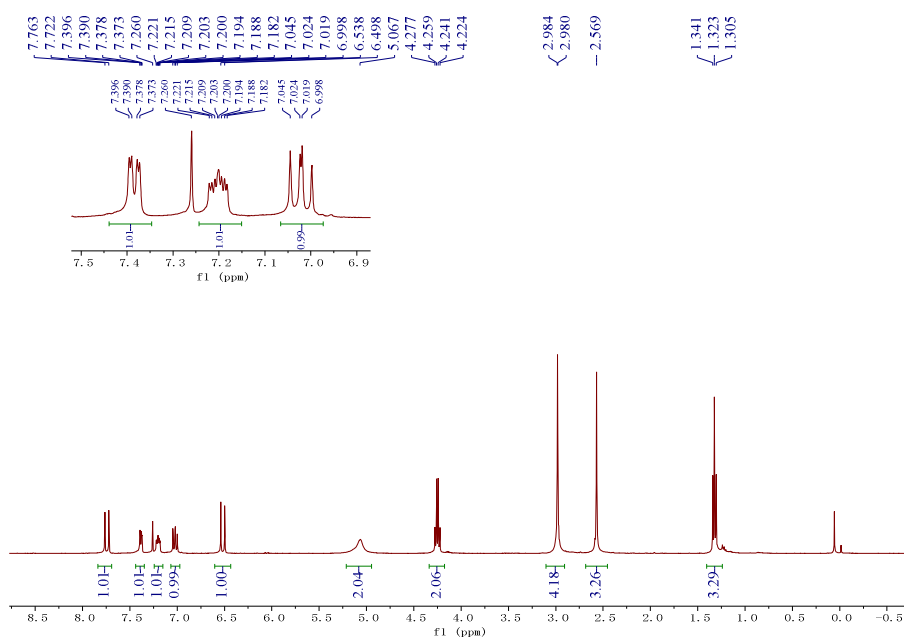

S113

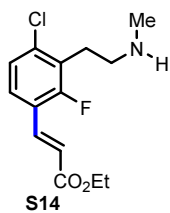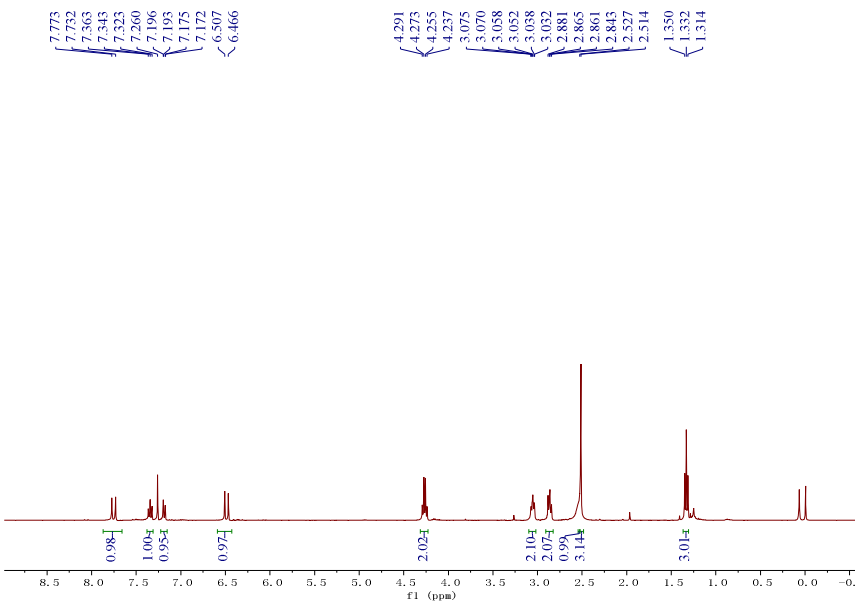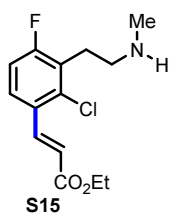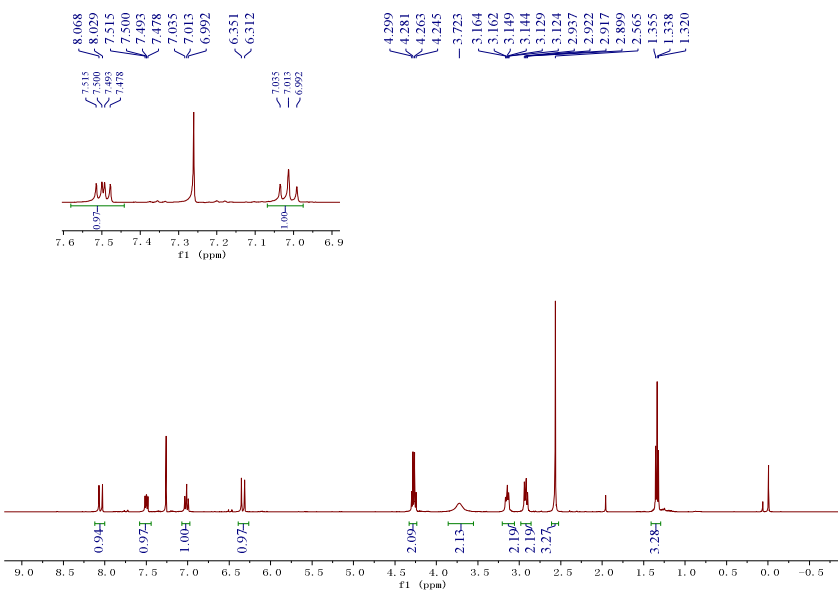

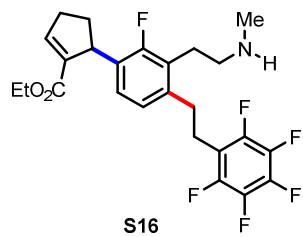

S16

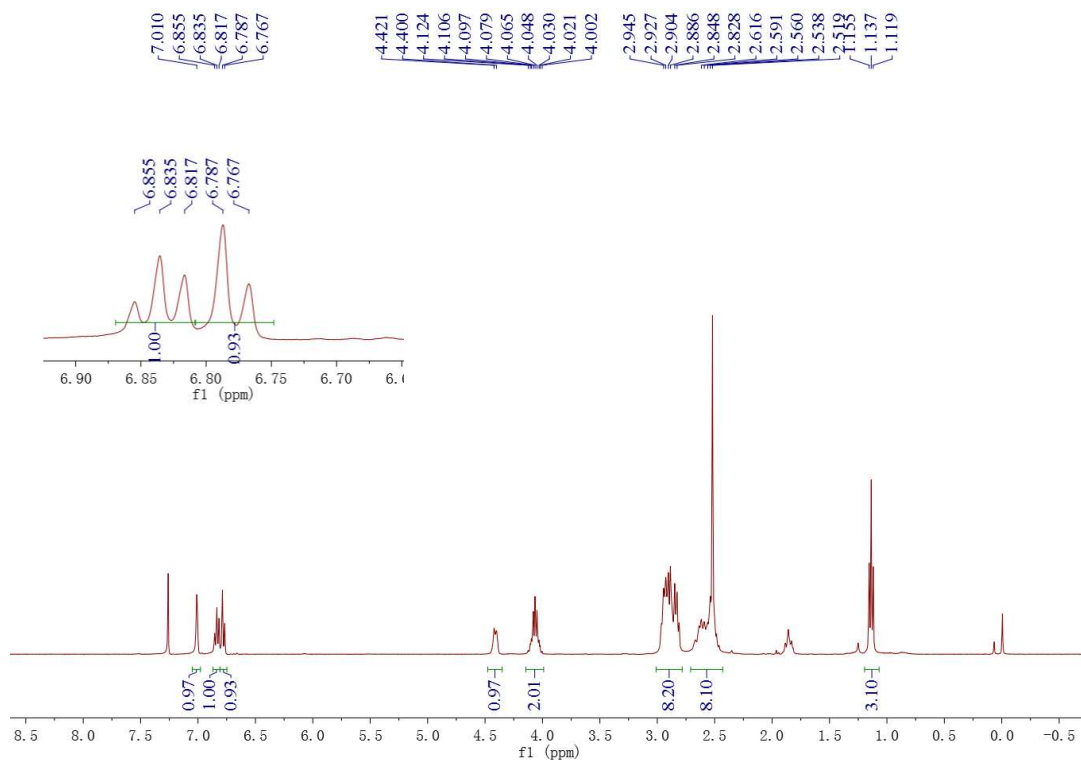

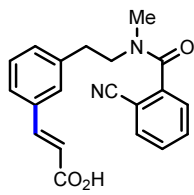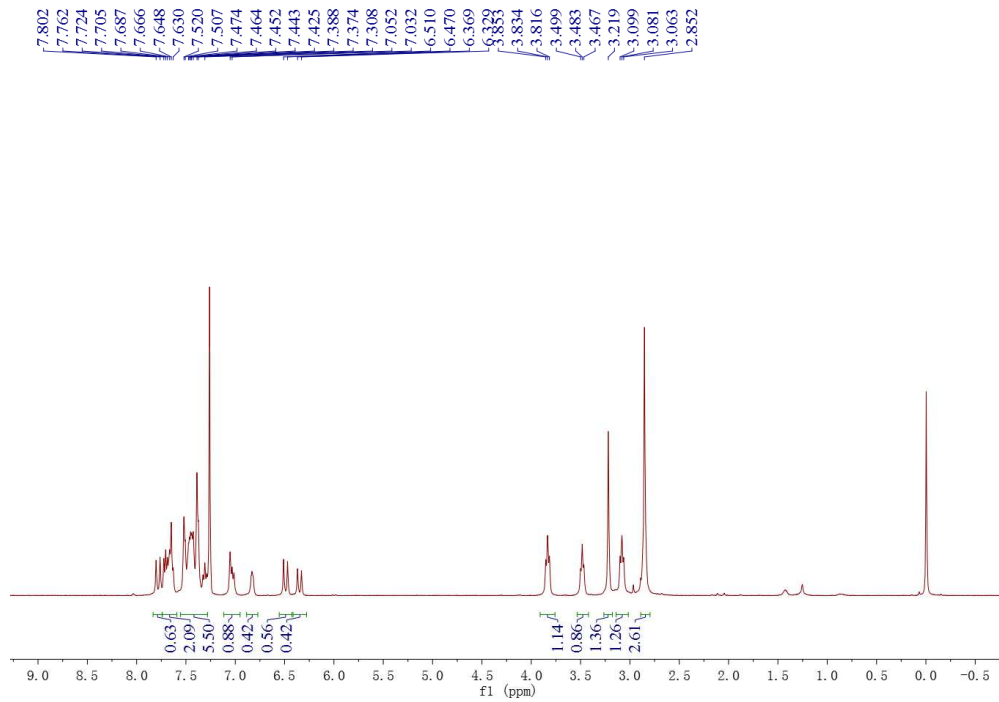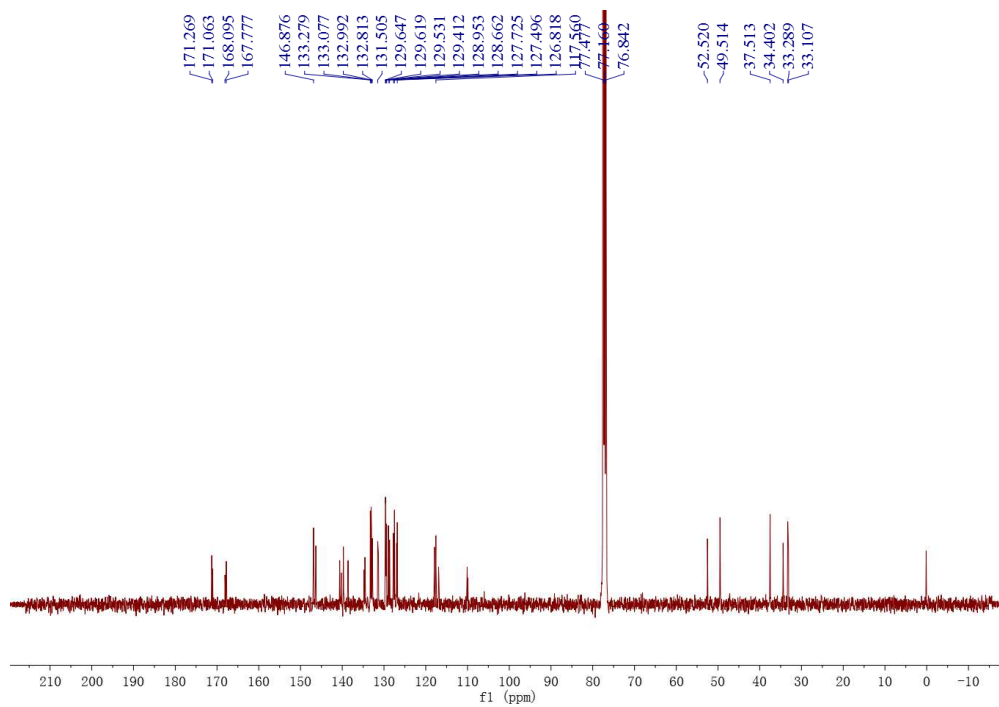

#### 4. X-Ray Crystallography data for 1a' (CCDC 1056709) and S17 (CCDC 1406595)

##### 1a' (CCDC 1056709):

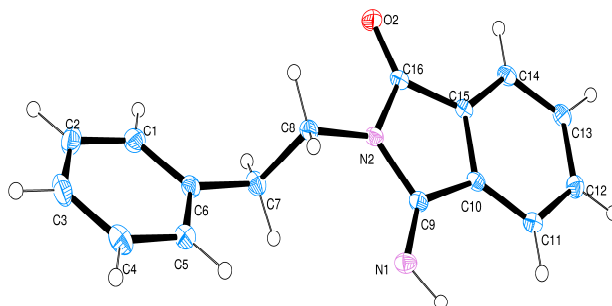

Table S1. Crystal data and structure refinement for Compound **1a'**.

|                                 |                                             |                             |
|---------------------------------|---------------------------------------------|-----------------------------|
| Identification code             | Compound-1a                                 |                             |
| Empirical formula               | C16 H14 N2 O                                |                             |
| Formula weight                  | 250.29                                      |                             |
| Temperature                     | 100.0(2) K                                  |                             |
| Wavelength                      | 1.54184 Å                                   |                             |
| Crystal system                  | Monoclinic                                  |                             |
| Space group                     | P 21/n                                      |                             |
| Unit cell dimensions            | a = 13.4616(3) Å                            | $\alpha = 90^\circ$ .       |
|                                 | b = 4.95900(10) Å                           | $\beta = 93.710(2)^\circ$ . |
|                                 | c = 19.7696(5) Å                            | $\gamma = 90^\circ$ .       |
| Volume                          | 1316.98(5) Å <sup>3</sup>                   |                             |
| Z                               | 4                                           |                             |
| Density (calculated)            | 1.262 Mg/m <sup>3</sup>                     |                             |
| Absorption coefficient          | 0.637 mm <sup>-1</sup>                      |                             |
| F(000)                          | 528                                         |                             |
| Crystal size                    | 0.120 x 0.030 x 0.020 mm <sup>3</sup>       |                             |
| Theta range for data collection | 3.859 to 73.251°.                           |                             |
| Index ranges                    | -15 ≤ h ≤ 16, -3 ≤ k ≤ 5, -20 ≤ l ≤ 24      |                             |
| Reflections collected           | 4354                                        |                             |
| Independent reflections         | 2540 [R(int) = 0.0222]                      |                             |
| Completeness to theta = 67.684° | 99.9 %                                      |                             |
| Absorption correction           | Semi-empirical from equivalents             |                             |
| Max. and min. transmission      | 1.00000 and 0.87424                         |                             |
| Refinement method               | Full-matrix least-squares on F <sup>2</sup> |                             |

|                                      |                                    |
|--------------------------------------|------------------------------------|
| Data / restraints / parameters       | 2540 / 0 / 176                     |
| Goodness-of-fit on $F^2$             | 1.042                              |
| Final R indices [ $I > 2\sigma(I)$ ] | R1 = 0.0368, wR2 = 0.0911          |
| R indices (all data)                 | R1 = 0.0474, wR2 = 0.0986          |
| Extinction coefficient               | n/a                                |
| Largest diff. peak and hole          | 0.211 and -0.205 e.Å <sup>-3</sup> |

Table S2. Atomic coordinates ( $\times 10^4$ ) and equivalent isotropic displacement parameters ( $\text{\AA}^2 \times 10^3$ ) for Ig-003\_a. U(eq) is defined as one third of the trace of the orthogonalized  $U^{ij}$  tensor.

|       | x       | y        | z       | U(eq) |
|-------|---------|----------|---------|-------|
| O(2)  | 6167(1) | 5269(2)  | 6691(1) | 26(1) |
| N(1)  | 3017(1) | 2771(2)  | 7234(1) | 22(1) |
| N(2)  | 4512(1) | 4401(2)  | 6853(1) | 19(1) |
| C(1)  | 3362(1) | 8744(3)  | 4795(1) | 27(1) |
| C(2)  | 2802(1) | 10768(3) | 4462(1) | 32(1) |
| C(3)  | 1881(1) | 11453(3) | 4677(1) | 33(1) |
| C(4)  | 1514(1) | 10119(3) | 5223(1) | 32(1) |
| C(5)  | 2073(1) | 8106(3)  | 5555(1) | 27(1) |
| C(6)  | 3004(1) | 7395(3)  | 5348(1) | 22(1) |
| C(7)  | 3614(1) | 5276(3)  | 5733(1) | 24(1) |
| C(8)  | 4060(1) | 6445(3)  | 6403(1) | 20(1) |
| C(9)  | 3962(1) | 2696(3)  | 7252(1) | 18(1) |
| C(10) | 4707(1) | 1037(3)  | 7653(1) | 18(1) |
| C(11) | 4585(1) | -984(3)  | 8126(1) | 21(1) |
| C(12) | 5446(1) | -2135(3) | 8433(1) | 23(1) |
| C(13) | 6390(1) | -1270(3) | 8277(1) | 23(1) |
| C(14) | 6506(1) | 756(3)   | 7799(1) | 21(1) |
| C(15) | 5647(1) | 1864(3)  | 7490(1) | 18(1) |
| C(16) | 5531(1) | 4030(3)  | 6971(1) | 19(1) |

Table S3. Bond lengths [Å] and angles [°] for lg-003\_a.

---

|             |            |
|-------------|------------|
| O(2)-C(16)  | 1.2162(16) |
| N(1)-C(9)   | 1.2713(16) |
| N(1)-H(1N)  | 0.937(19)  |
| N(2)-C(16)  | 1.3889(15) |
| N(2)-C(9)   | 1.4007(17) |
| N(2)-C(8)   | 1.4554(16) |
| C(1)-C(6)   | 1.3940(19) |
| C(1)-C(2)   | 1.394(2)   |
| C(1)-H(1)   | 0.9500     |
| C(2)-C(3)   | 1.378(2)   |
| C(2)-H(2)   | 0.9500     |
| C(3)-C(4)   | 1.384(2)   |
| C(3)-H(3)   | 0.9500     |
| C(4)-C(5)   | 1.389(2)   |
| C(4)-H(4)   | 0.9500     |
| C(5)-C(6)   | 1.3904(19) |
| C(5)-H(5)   | 0.9500     |
| C(6)-C(7)   | 1.5081(19) |
| C(7)-C(8)   | 1.5331(18) |
| C(7)-H(7A)  | 0.9900     |
| C(7)-H(7B)  | 0.9900     |
| C(8)-H(8A)  | 0.9900     |
| C(8)-H(8B)  | 0.9900     |
| C(9)-C(10)  | 1.4855(18) |
| C(10)-C(15) | 1.3880(17) |
| C(10)-C(11) | 1.3878(19) |
| C(11)-C(12) | 1.3950(18) |
| C(11)-H(11) | 0.9500     |
| C(12)-C(13) | 1.3961(19) |
| C(12)-H(12) | 0.9500     |
| C(13)-C(14) | 1.394(2)   |
| C(13)-H(13) | 0.9500     |
| C(14)-C(15) | 1.3852(18) |
| C(14)-H(14) | 0.9500     |
| C(15)-C(16) | 1.4867(19) |



|                   |            |
|-------------------|------------|
| C(9)-N(1)-H(1N)   | 111.5(11)  |
| C(16)-N(2)-C(9)   | 112.16(11) |
| C(16)-N(2)-C(8)   | 124.34(11) |
| C(9)-N(2)-C(8)    | 123.37(10) |
| C(6)-C(1)-C(2)    | 120.79(14) |
| C(6)-C(1)-H(1)    | 119.6      |
| C(2)-C(1)-H(1)    | 119.6      |
| C(3)-C(2)-C(1)    | 120.10(14) |
| C(3)-C(2)-H(2)    | 119.9      |
| C(1)-C(2)-H(2)    | 119.9      |
| C(2)-C(3)-C(4)    | 119.74(14) |
| C(2)-C(3)-H(3)    | 120.1      |
| C(4)-C(3)-H(3)    | 120.1      |
| C(3)-C(4)-C(5)    | 120.17(14) |
| C(3)-C(4)-H(4)    | 119.9      |
| C(5)-C(4)-H(4)    | 119.9      |
| C(4)-C(5)-C(6)    | 120.93(13) |
| C(4)-C(5)-H(5)    | 119.5      |
| C(6)-C(5)-H(5)    | 119.5      |
| C(5)-C(6)-C(1)    | 118.27(13) |
| C(5)-C(6)-C(7)    | 119.96(12) |
| C(1)-C(6)-C(7)    | 121.74(13) |
| C(6)-C(7)-C(8)    | 110.03(11) |
| C(6)-C(7)-H(7A)   | 109.7      |
| C(8)-C(7)-H(7A)   | 109.7      |
| C(6)-C(7)-H(7B)   | 109.7      |
| C(8)-C(7)-H(7B)   | 109.7      |
| H(7A)-C(7)-H(7B)  | 108.2      |
| N(2)-C(8)-C(7)    | 112.95(11) |
| N(2)-C(8)-H(8A)   | 109.0      |
| C(7)-C(8)-H(8A)   | 109.0      |
| N(2)-C(8)-H(8B)   | 109.0      |
| C(7)-C(8)-H(8B)   | 109.0      |
| H(8A)-C(8)-H(8B)  | 107.8      |
| N(1)-C(9)-N(2)    | 122.07(12) |
| N(1)-C(9)-C(10)   | 132.16(12) |
| N(2)-C(9)-C(10)   | 105.77(10) |
| C(15)-C(10)-C(11) | 121.25(12) |

|                   |            |
|-------------------|------------|
| C(15)-C(10)-C(9)  | 107.89(11) |
| C(11)-C(10)-C(9)  | 130.85(11) |
| C(10)-C(11)-C(12) | 117.26(12) |
| C(10)-C(11)-H(11) | 121.4      |
| C(12)-C(11)-H(11) | 121.4      |
| C(11)-C(12)-C(13) | 121.35(13) |
| C(11)-C(12)-H(12) | 119.3      |
| C(13)-C(12)-H(12) | 119.3      |
| C(14)-C(13)-C(12) | 121.00(12) |
| C(14)-C(13)-H(13) | 119.5      |
| C(12)-C(13)-H(13) | 119.5      |
| C(15)-C(14)-C(13) | 117.23(12) |
| C(15)-C(14)-H(14) | 121.4      |
| C(13)-C(14)-H(14) | 121.4      |
| C(14)-C(15)-C(10) | 121.90(13) |
| C(14)-C(15)-C(16) | 129.66(12) |
| C(10)-C(15)-C(16) | 108.44(11) |
| O(2)-C(16)-N(2)   | 125.01(12) |
| O(2)-C(16)-C(15)  | 129.27(12) |
| N(2)-C(16)-C(15)  | 105.72(10) |

---

Symmetry transformations used to generate equivalent atoms:

Table S4. Anisotropic displacement parameters ( $\text{\AA}^2 \times 10^3$ ) for Ig-003\_a. The anisotropic displacement factor exponent takes the form:  $-2\pi^2 [ h^2 a^{*2} U^{11} + \dots + 2 h k a^* b^* U^{12} ]$

|       | $U^{11}$ | $U^{22}$ | $U^{33}$ | $U^{23}$ | $U^{13}$ | $U^{12}$ |
|-------|----------|----------|----------|----------|----------|----------|
| O(2)  | 18(1)    | 32(1)    | 29(1)    | 5(1)     | 2(1)     | -5(1)    |
| N(1)  | 14(1)    | 20(1)    | 30(1)    | -1(1)    | 2(1)     | 1(1)     |
| N(2)  | 14(1)    | 19(1)    | 23(1)    | 0(1)     | -1(1)    | -1(1)    |
| C(1)  | 30(1)    | 28(1)    | 23(1)    | -3(1)    | 1(1)     | -6(1)    |
| C(2)  | 49(1)    | 26(1)    | 21(1)    | 3(1)     | -5(1)    | -10(1)   |
| C(3)  | 42(1)    | 24(1)    | 29(1)    | 0(1)     | -16(1)   | 2(1)     |
| C(4)  | 25(1)    | 37(1)    | 33(1)    | -2(1)    | -6(1)    | 5(1)     |
| C(5)  | 24(1)    | 31(1)    | 26(1)    | 4(1)     | -1(1)    | -2(1)    |
| C(6)  | 25(1)    | 19(1)    | 21(1)    | -2(1)    | -4(1)    | -2(1)    |
| C(7)  | 26(1)    | 21(1)    | 25(1)    | -3(1)    | -4(1)    | 2(1)     |
| C(8)  | 19(1)    | 17(1)    | 24(1)    | 1(1)     | -2(1)    | 0(1)     |
| C(9)  | 17(1)    | 16(1)    | 21(1)    | -3(1)    | 0(1)     | 0(1)     |
| C(10) | 16(1)    | 17(1)    | 20(1)    | -4(1)    | -1(1)    | 1(1)     |
| C(11) | 18(1)    | 21(1)    | 23(1)    | -3(1)    | 1(1)     | -1(1)    |
| C(12) | 25(1)    | 22(1)    | 22(1)    | 1(1)     | 0(1)     | 2(1)     |
| C(13) | 18(1)    | 26(1)    | 24(1)    | -1(1)    | -3(1)    | 5(1)     |
| C(14) | 14(1)    | 25(1)    | 25(1)    | -1(1)    | -1(1)    | 1(1)     |
| C(15) | 16(1)    | 20(1)    | 19(1)    | -3(1)    | 0(1)     | 0(1)     |
| C(16) | 15(1)    | 21(1)    | 22(1)    | -4(1)    | -1(1)    | -1(1)    |

**S17 (CCDC 1406595):**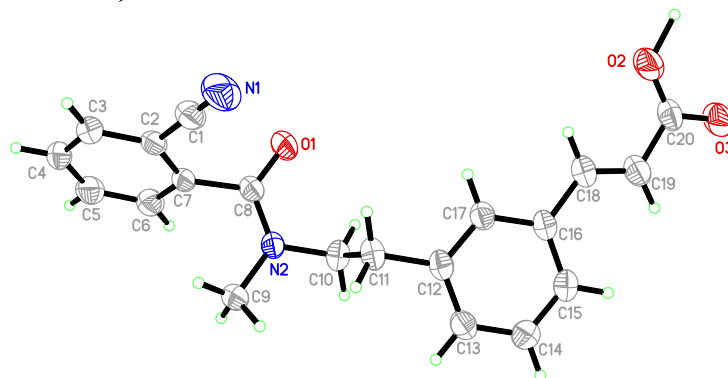

Table 1. Crystal data and structure refinement for 1\_a.

|                                 |                                                               |                 |
|---------------------------------|---------------------------------------------------------------|-----------------|
| Identification code             | compound-1                                                    |                 |
| Empirical formula               | C <sub>20</sub> H <sub>18</sub> N <sub>2</sub> O <sub>3</sub> |                 |
| Formula weight                  | 334.36                                                        |                 |
| Temperature                     | 293(2) K                                                      |                 |
| Wavelength                      | 0.71073 Å                                                     |                 |
| Crystal system                  | Monoclinic                                                    |                 |
| Space group                     | C 2/c                                                         |                 |
| Unit cell dimensions            | a = 33.970(16) Å                                              | α = 90°.        |
|                                 | b = 6.299(3) Å                                                | β = 92.257(8)°. |
|                                 | c = 16.431(8) Å                                               | γ = 90°.        |
| Volume                          | 3513(3) Å <sup>3</sup>                                        |                 |
| Z                               | 8                                                             |                 |
| Density (calculated)            | 1.264 Mg/m <sup>3</sup>                                       |                 |
| Absorption coefficient          | 0.086 mm <sup>-1</sup>                                        |                 |
| F(000)                          | 1408                                                          |                 |
| Crystal size                    | 0.200 x 0.180 x 0.150 mm <sup>3</sup>                         |                 |
| Theta range for data collection | 2.400 to 27.516°.                                             |                 |
| Index ranges                    | -44 ≤ h ≤ 42, -8 ≤ k ≤ 8, -20 ≤ l ≤ 21                        |                 |
| Reflections collected           | 12961                                                         |                 |
| Independent reflections         | 4016 [R(int) = 0.0269]                                        |                 |
| Completeness to theta = 25.242° | 99.7 %                                                        |                 |
| Absorption correction           | Semi-empirical from equivalents                               |                 |
| Max. and min. transmission      | 1.0000 and 0.9560                                             |                 |
| Refinement method               | Full-matrix least-squares on F <sup>2</sup>                   |                 |
| Data / restraints / parameters  | 4016 / 0 / 230                                                |                 |

|                                      |                                       |
|--------------------------------------|---------------------------------------|
| Goodness-of-fit on $F^2$             | 1.090                                 |
| Final R indices [ $I > 2\sigma(I)$ ] | R1 = 0.0586, wR2 = 0.1406             |
| R indices (all data)                 | R1 = 0.0856, wR2 = 0.1579             |
| Extinction coefficient               | n/a                                   |
| Largest diff. peak and hole          | 0.202 and -0.178 e. $\text{\AA}^{-3}$ |

Table 2. Atomic coordinates ( $\times 10^4$ ) and equivalent isotropic displacement parameters ( $\text{\AA}^2 \times 10^3$ ) for 1\_a.  $U(\text{eq})$  is defined as one third of the trace of the orthogonalized  $U^{ij}$  tensor.

|       | x       | y       | z       | U(eq)  |
|-------|---------|---------|---------|--------|
| O(1)  | 6374(1) | 358(3)  | 4870(1) | 100(1) |
| O(2)  | 5338(1) | 548(3)  | 9311(1) | 91(1)  |
| O(3)  | 4831(1) | 2477(3) | 9675(1) | 92(1)  |
| N(1)  | 7374(1) | 36(4)   | 5463(1) | 97(1)  |
| N(2)  | 6407(1) | 3734(2) | 4426(1) | 51(1)  |
| C(1)  | 7270(1) | 70(3)   | 4796(1) | 65(1)  |
| C(2)  | 7135(1) | 118(3)  | 3949(1) | 51(1)  |
| C(3)  | 7372(1) | -688(3) | 3355(1) | 62(1)  |
| C(4)  | 7239(1) | -648(3) | 2551(1) | 68(1)  |
| C(5)  | 6876(1) | 156(3)  | 2344(1) | 66(1)  |
| C(6)  | 6640(1) | 968(3)  | 2932(1) | 60(1)  |
| C(7)  | 6768(1) | 960(3)  | 3743(1) | 49(1)  |
| C(8)  | 6499(1) | 1682(3) | 4398(1) | 58(1)  |
| C(9)  | 6603(1) | 5366(3) | 3965(1) | 62(1)  |
| C(10) | 6134(1) | 4463(3) | 5033(1) | 57(1)  |
| C(11) | 6344(1) | 5200(3) | 5814(1) | 58(1)  |
| C(12) | 6052(1) | 5940(3) | 6419(1) | 52(1)  |
| C(13) | 5885(1) | 7952(3) | 6357(1) | 58(1)  |
| C(14) | 5618(1) | 8629(3) | 6919(1) | 62(1)  |
| C(15) | 5510(1) | 7305(3) | 7541(1) | 58(1)  |
| C(16) | 5659(1) | 5249(3) | 7599(1) | 52(1)  |
| C(17) | 5934(1) | 4611(3) | 7038(1) | 53(1)  |
| C(18) | 5535(1) | 3720(3) | 8211(1) | 58(1)  |
| C(19) | 5234(1) | 3871(4) | 8687(1) | 65(1)  |
| C(20) | 5133(1) | 2203(4) | 9259(1) | 63(1)  |

Table 3. Bond lengths [Å] and angles [°] for 1\_a.

---

|              |          |
|--------------|----------|
| O(1)-C(8)    | 1.226(2) |
| O(2)-C(20)   | 1.254(3) |
| O(2)-H(2O)   | 1.26(3)  |
| O(3)-C(20)   | 1.268(2) |
| N(1)-C(1)    | 1.139(3) |
| N(2)-C(8)    | 1.331(2) |
| N(2)-C(9)    | 1.454(2) |
| N(2)-C(10)   | 1.462(2) |
| C(1)-C(2)    | 1.448(3) |
| C(2)-C(3)    | 1.386(3) |
| C(2)-C(7)    | 1.387(3) |
| C(3)-C(4)    | 1.380(3) |
| C(3)-H(3)    | 0.9500   |
| C(4)-C(5)    | 1.363(3) |
| C(4)-H(4)    | 0.9500   |
| C(5)-C(6)    | 1.378(3) |
| C(5)-H(5)    | 0.9500   |
| C(6)-C(7)    | 1.385(3) |
| C(6)-H(6)    | 0.9500   |
| C(7)-C(8)    | 1.508(2) |
| C(9)-H(9A)   | 0.9800   |
| C(9)-H(9B)   | 0.9800   |
| C(9)-H(9C)   | 0.9800   |
| C(10)-C(11)  | 1.517(3) |
| C(10)-H(10A) | 0.9900   |
| C(10)-H(10B) | 0.9900   |
| C(11)-C(12)  | 1.506(2) |
| C(11)-H(11A) | 0.9900   |
| C(11)-H(11B) | 0.9900   |
| C(12)-C(17)  | 1.387(2) |
| C(12)-C(13)  | 1.390(3) |
| C(13)-C(14)  | 1.387(3) |
| C(13)-H(13)  | 0.9500   |
| C(14)-C(15)  | 1.380(3) |
| C(14)-H(14)  | 0.9500   |
| C(15)-C(16)  | 1.393(3) |

|                  |            |
|------------------|------------|
| C(15)-H(15)      | 0.9500     |
| C(16)-C(17)      | 1.397(2)   |
| C(16)-C(18)      | 1.467(3)   |
| C(17)-H(17)      | 0.9500     |
| C(18)-C(19)      | 1.314(3)   |
| C(18)-H(18)      | 0.9500     |
| C(19)-C(20)      | 1.459(3)   |
| C(19)-H(19)      | 0.9500     |
|                  |            |
| C(20)-O(2)-H(20) | 122.8(11)  |
| C(8)-N(2)-C(9)   | 123.76(16) |
| C(8)-N(2)-C(10)  | 119.01(15) |
| C(9)-N(2)-C(10)  | 116.66(15) |
| N(1)-C(1)-C(2)   | 179.6(3)   |
| C(3)-C(2)-C(7)   | 120.70(16) |
| C(3)-C(2)-C(1)   | 119.92(18) |
| C(7)-C(2)-C(1)   | 119.38(17) |
| C(4)-C(3)-C(2)   | 119.3(2)   |
| C(4)-C(3)-H(3)   | 120.3      |
| C(2)-C(3)-H(3)   | 120.3      |
| C(5)-C(4)-C(3)   | 120.31(18) |
| C(5)-C(4)-H(4)   | 119.8      |
| C(3)-C(4)-H(4)   | 119.8      |
| C(4)-C(5)-C(6)   | 120.64(18) |
| C(4)-C(5)-H(5)   | 119.7      |
| C(6)-C(5)-H(5)   | 119.7      |
| C(5)-C(6)-C(7)   | 120.21(19) |
| C(5)-C(6)-H(6)   | 119.9      |
| C(7)-C(6)-H(6)   | 119.9      |
| C(6)-C(7)-C(2)   | 118.80(16) |
| C(6)-C(7)-C(8)   | 120.65(18) |
| C(2)-C(7)-C(8)   | 120.35(16) |
| O(1)-C(8)-N(2)   | 123.41(18) |
| O(1)-C(8)-C(7)   | 118.74(18) |
| N(2)-C(8)-C(7)   | 117.85(15) |
| N(2)-C(9)-H(9A)  | 109.5      |
| N(2)-C(9)-H(9B)  | 109.5      |
| H(9A)-C(9)-H(9B) | 109.5      |



|                     |            |
|---------------------|------------|
| N(2)-C(9)-H(9C)     | 109.5      |
| H(9A)-C(9)-H(9C)    | 109.5      |
| H(9B)-C(9)-H(9C)    | 109.5      |
| N(2)-C(10)-C(11)    | 112.59(15) |
| N(2)-C(10)-H(10A)   | 109.1      |
| C(11)-C(10)-H(10A)  | 109.1      |
| N(2)-C(10)-H(10B)   | 109.1      |
| C(11)-C(10)-H(10B)  | 109.1      |
| H(10A)-C(10)-H(10B) | 107.8      |
| C(12)-C(11)-C(10)   | 110.68(15) |
| C(12)-C(11)-H(11A)  | 109.5      |
| C(10)-C(11)-H(11A)  | 109.5      |
| C(12)-C(11)-H(11B)  | 109.5      |
| C(10)-C(11)-H(11B)  | 109.5      |
| H(11A)-C(11)-H(11B) | 108.1      |
| C(17)-C(12)-C(13)   | 118.38(17) |
| C(17)-C(12)-C(11)   | 120.85(18) |
| C(13)-C(12)-C(11)   | 120.74(17) |
| C(14)-C(13)-C(12)   | 120.49(18) |
| C(14)-C(13)-H(13)   | 119.8      |
| C(12)-C(13)-H(13)   | 119.8      |
| C(15)-C(14)-C(13)   | 120.43(19) |
| C(15)-C(14)-H(14)   | 119.8      |
| C(13)-C(14)-H(14)   | 119.8      |
| C(14)-C(15)-C(16)   | 120.43(17) |
| C(14)-C(15)-H(15)   | 119.8      |
| C(16)-C(15)-H(15)   | 119.8      |
| C(15)-C(16)-C(17)   | 118.25(17) |
| C(15)-C(16)-C(18)   | 122.90(17) |
| C(17)-C(16)-C(18)   | 118.84(18) |
| C(12)-C(17)-C(16)   | 121.95(18) |
| C(12)-C(17)-H(17)   | 119.0      |
| C(16)-C(17)-H(17)   | 119.0      |
| C(19)-C(18)-C(16)   | 127.8(2)   |
| C(19)-C(18)-H(18)   | 116.1      |
| C(16)-C(18)-H(18)   | 116.1      |
| C(18)-C(19)-C(20)   | 122.6(2)   |
| C(18)-C(19)-H(19)   | 118.7      |

|                   |            |
|-------------------|------------|
| C(20)-C(19)-H(19) | 118.7      |
| O(2)-C(20)-O(3)   | 122.4(2)   |
| O(2)-C(20)-C(19)  | 119.91(19) |
| O(3)-C(20)-C(19)  | 117.7(2)   |

---

Symmetry transformations used to generate equivalent atoms:

Table 4. Anisotropic displacement parameters ( $\text{\AA}^2 \times 10^3$ ) for 1\_a. The anisotropic displacement factor exponent takes the form:  $-2\pi^2 [ h^2 a^{*2} U^{11} + \dots + 2 h k a^* b^* U^{12} ]$

|       | U <sup>11</sup> | U <sup>22</sup> | U <sup>33</sup> | U <sup>23</sup> | U <sup>13</sup> | U <sup>12</sup> |
|-------|-----------------|-----------------|-----------------|-----------------|-----------------|-----------------|
| O(1)  | 143(2)          | 59(1)           | 105(1)          | 17(1)           | 77(1)           | 0(1)            |
| O(2)  | 92(1)           | 100(1)          | 82(1)           | 30(1)           | 40(1)           | 20(1)           |
| O(3)  | 83(1)           | 106(1)          | 91(1)           | 29(1)           | 45(1)           | 17(1)           |
| N(1)  | 137(2)          | 100(2)          | 54(1)           | 10(1)           | -6(1)           | 4(1)            |
| N(2)  | 58(1)           | 49(1)           | 48(1)           | -2(1)           | 16(1)           | -3(1)           |
| C(1)  | 85(2)           | 59(1)           | 51(1)           | 7(1)            | 8(1)            | 2(1)            |
| C(2)  | 70(1)           | 40(1)           | 44(1)           | 5(1)            | 10(1)           | -3(1)           |
| C(3)  | 72(1)           | 57(1)           | 58(1)           | 7(1)            | 16(1)           | 11(1)           |
| C(4)  | 97(2)           | 57(1)           | 52(1)           | 0(1)            | 27(1)           | 10(1)           |
| C(5)  | 96(2)           | 59(1)           | 43(1)           | -2(1)           | 3(1)            | 2(1)            |
| C(6)  | 69(1)           | 58(1)           | 52(1)           | 3(1)            | 3(1)            | 2(1)            |
| C(7)  | 63(1)           | 38(1)           | 46(1)           | 2(1)            | 15(1)           | -3(1)           |
| C(8)  | 72(1)           | 48(1)           | 55(1)           | 3(1)            | 21(1)           | -5(1)           |
| C(9)  | 80(1)           | 49(1)           | 59(1)           | 3(1)            | 19(1)           | -4(1)           |
| C(10) | 52(1)           | 67(1)           | 52(1)           | -9(1)           | 11(1)           | 1(1)            |
| C(11) | 55(1)           | 75(1)           | 46(1)           | -1(1)           | 10(1)           | -1(1)           |
| C(12) | 52(1)           | 64(1)           | 41(1)           | -3(1)           | 5(1)            | -6(1)           |
| C(13) | 63(1)           | 62(1)           | 49(1)           | 5(1)            | 7(1)            | -5(1)           |
| C(14) | 62(1)           | 60(1)           | 64(1)           | 0(1)            | 6(1)            | 4(1)            |
| C(15) | 55(1)           | 68(1)           | 51(1)           | -7(1)           | 10(1)           | 0(1)            |
| C(16) | 52(1)           | 64(1)           | 41(1)           | -2(1)           | 7(1)            | -7(1)           |
| C(17) | 59(1)           | 56(1)           | 44(1)           | -1(1)           | 6(1)            | -2(1)           |
| C(18) | 58(1)           | 72(1)           | 44(1)           | 0(1)            | 7(1)            | -6(1)           |
| C(19) | 64(1)           | 80(2)           | 52(1)           | 10(1)           | 9(1)            | 2(1)            |
| C(20) | 56(1)           | 85(2)           | 48(1)           | 7(1)            | 11(1)           | 1(1)            |

Table 5. Hydrogen coordinates ( $\times 10^4$ ) and isotropic displacement parameters ( $\text{\AA}^2 \times 10^3$ ) for 1\_a.

|        | x       | y        | z        | U(eq) |
|--------|---------|----------|----------|-------|
| H(2O)  | 5263(7) | -960(40) | 9787(16) | 109   |
| H(3)   | 7624    | -1263    | 3500     | 75    |
| H(4)   | 7401    | -1184    | 2139     | 82    |
| H(5)   | 6785    | 156      | 1790     | 79    |
| H(6)   | 6388    | 1536     | 2780     | 72    |
| H(9A)  | 6868    | 4881     | 3839     | 94    |
| H(9B)  | 6623    | 6671     | 4289     | 94    |
| H(9C)  | 6451    | 5646     | 3457     | 94    |
| H(10A) | 5952    | 3291     | 5159     | 68    |
| H(10B) | 5975    | 5648     | 4801     | 68    |
| H(11A) | 6502    | 4018     | 6052     | 70    |
| H(11B) | 6526    | 6378     | 5692     | 70    |
| H(13)  | 5954    | 8869     | 5926     | 70    |
| H(14)  | 5508    | 10014    | 6875     | 74    |
| H(15)  | 5333    | 7798     | 7932     | 69    |
| H(17)  | 6043    | 3225     | 7080     | 63    |
| H(18)  | 5690    | 2471     | 8270     | 70    |
| H(19)  | 5076    | 5115     | 8658     | 78    |

Table 6. Hydrogen bonds for 1\_a [ $\text{\AA}$  and  $^\circ$ ].

| D-H...A             | d(D-H)  | d(H...A) | d(D...A) | $\angle(\text{DHA})$ |
|---------------------|---------|----------|----------|----------------------|
| O(2)-H(2O)...O(2)#1 | 1.26(3) | 2.58(3)  | 3.361(3) | 117.7(15)            |
| O(2)-H(2O)...O(3)#1 | 1.26(3) | 1.35(3)  | 2.610(2) | 176(2)               |

Symmetry transformations used to generate equivalent atoms:

#1  $-x+1, -y, -z+2$
